# Supplementary material
Source: publisher site journal article supplement (https://www.dovepress.com/article/supplementary_file/574294/574294_Supplementary%20file%201(0228).xlsx)
Supplement: Supplementary file 1 [file 574294_Supplementary%20file%201(0228).xlsx]

## Sheet: Catalog
Catalog
Table S1. Gene expression of ferroptosis pathway in GSEA for model vs control groups.
Table S2. Gene expression of ferroptosis pathway in GSEA for DHA vs model groups.
Table S3. Summary of UKBPPP exposure data with F-statistics in the present study.
Table S4. Summary of ferroptosis-related exposure data with F-statistics in the present study.
Table S5. Causal relationship analysis results between UKBPPP and SONFH.
Table S6. SNP analysis results of UKBPPP and SONFH causal relationship.
Table S7. Heterogeneity analysis results of UKBPPP and SONFH causal relationship.
Table S8. Horizontal pleiotropy analysis results of UKBPPP and SONFH causal relationship.
Table S9. Summary of SONFH exposure data with F-statistics for reverse Mendelian randomization analysis in the present study.
Table S10. Causal relationship analysis results of ferroptosis-related targets and SONFH.
Table S11. SNP analysis results of ferroptosis-related targets and SONFH causal relationship.
Table S12. Heterogeneity analysis results of ferroptosis-related targets and SONFH causal relationship.
Table S13. Horizontal pleiotropy analysis results of ferroptosis-related targets and SONFH causal relationship.
Table S14. Causal relationship analysis results of UKBPPP key genes and ferroptosis core genes.
Table S15. SNP analysis results of UKBPPP key genes and ferroptosis core genes causal relationship.
Table S16. Heterogeneity analysis results of UKBPPP key genes and ferroptosis core genes causal relationship.
Table S17. Horizontal pleiotropy analysis results of UKBPPP key genes and ferroptosis core genes causal relationship.

## Sheet: Table S1
Table S1. Gene expression of ferroptosis pathway in GSEA for model vs control groups.
id	model_7	model_8	model_9	Control_3	Control_7	Control_8
Inhca	19.5739	15.2237	20.7497	8.57943	9.68252	9.37776
Tfrc	247.576	203.484	198.207	112.676	131.976	121.362
Ftl1l1	1.56002	1.61161	1.95664	1.02285	1.014	0.961673
Alox15	108.956	89.4532	150.009	43.5283	77.0046	34.3571
Hmox1	101.986	62.282	80.8441	49.5554	51.2549	46.3294
LOC100359668	2.84578	3.15425	3.96047	2.06812	2.10798	2.53727
Gclm	64.0415	52.6064	70.4629	33.0652	50.3953	42.5189
RGD1560687	2.5397	2.17549	4.40941	1.70059	1.88935	1.44726
Ftl1	1842.81	1756.1	1946.18	1309.76	1334.67	1320.76
LOC100362384	14.7847	14.125	16.0198	12.9041	9.94352	9.326
Slc7a11	0.166661	0.0886377	0.0723798	0.0566683	0.0719079	0.0329077
Slc3a2	71.8856	69.6947	74.32	52.9443	53.3518	53.5403
Acsl1	26.827	25.3295	25.6292	19.9187	18.4259	19.9601
Acsl6	0.30702	0.514029	0.133206	0.0923721	0.16941	0.183274
Slc11a2	15.8861	14.1176	15.4049	10.4275	11.3161	12.46
Prnp	37.4183	39.4937	43.1477	29.1706	32.6759	28.7078
Acsl5	45.1908	42.3657	57.609	36.1374	37.0411	41.4223
Fth1	1455.49	1545.29	1579.39	1199.84	1219.84	1207.73
Ncoa4	117.814	103.182	118.609	78.8	92.0057	102.972
Steap3	16.8589	17.3521	19.1744	13.7343	16.2786	13.1462
Slc39a14	9.67551	11.1803	5.89561	7.89954	5.92717	6.64198
Acsl4	7.04737	6.20823	6.66689	5.14253	5.65125	5.72747
LOC120102993	1.62244	0.998454	1.20673	0.966516	1.33561	0.907091
Slc39a8	19.6945	18.1855	18.1521	17.1271	16.4058	15.1499
Slc40a1	92.3818	71.6679	95.1425	73.9033	77.3025	74.5894
Lpcat3	60.889	50.358	71.3064	49.86	61.7095	55.0246
Gpx4	134.486	167.831	145.317	139.488	131.93	140.571
Gclc	28.1239	29.6469	40.8552	18.568	36.5405	33.3219
Map1lc3b	77.4509	77.7669	78.9523	75.2553	69.7329	72.6217
RGD1566189	1.23896	1.08655	0.663702	0.790785	1.01622	1.02048
Sat2	3.1555	3.73122	3.96947	3.8684	3.67454	2.94681
Atg7	1.33634	1.40859	2.26884	1.33027	1.78815	1.71554
LOC100360087	8.89931	9.23813	10.8077	16.0148	6.07967	5.73861
Tf	860.892	654.425	1051.08	548.511	999.767	956.774
Map1lc3a	69.8879	85.7522	60.7525	83.2392	68.0243	61.5346
Cybb	101.035	90.6556	140.845	87.7456	121.974	117.167
Vdac2	84.5538	93.8551	93.8586	95.239	85.6873	93.6059
Tp53	38.1864	37.7342	48.502	44.6261	42.887	38.9359
Vdac3	97.7429	96.412	105.901	91.5422	106.891	107.468
Pcbp1	160.417	134.032	179.543	150.462	176.465	162.047
Pcbp2	48.4721	50.6778	53.6031	55.5274	56.074	54.5719
Sat1	51.543	65.9185	46.1089	79.7368	49.1231	55.1775
Gss	5.24635	5.87559	5.59369	6.56652	5.78184	6.34197
Atg5	10.7864	11.2136	11.7198	12.5751	12.6802	13.9244
Cp	36.8433	39.6738	33.0025	49.8213	39.9285	48.9111
Acsl3	9.26055	10.1855	9.44307	15.2467	12.0175	12.1559

## Sheet: Table S2
Table S2. Gene expression of ferroptosis pathway in GSEA for DHA vs model groups.
id	DHA_3	DHA_2	DHA_7	model_7	model_8	model_9
Cp	42.4005	37.6026	48.772	36.8433	39.6738	33.0025
Cybb	254.536	111.8	100.761	101.035	90.6556	140.845
Tf	2173.03	745.842	712.793	860.892	654.425	1051.08
Acsl3	10.5829	11.4254	10.343	9.26055	10.1855	9.44307
Gss	6.78172	6.02141	5.81126	5.24635	5.87559	5.59369
Atg7	2.00612	1.7943	1.68288	1.33634	1.40859	2.26884
Lpcat3	71.8831	66.6921	55.7735	60.889	50.358	71.3064
Tp53	34.5607	47.6062	47.7943	38.1864	37.7342	48.502
Atg5	12.714	11.0278	11.4199	10.7864	11.2136	11.7198
Pcbp1	157.65	170.058	165.714	160.417	134.032	179.543
Pcbp2	48.5032	51.7662	54.7016	48.4721	50.6778	53.6031
Vdac2	105.815	85.6546	84.0577	84.5538	93.8551	93.8586
Slc7a11	0.208844	0.0794547	0.0415421	0.166661	0.0886377	0.0723798
Sat1	50.5344	48.6589	59.7196	51.543	65.9185	46.1089
Gclc	19.1256	31.8519	42.2721	28.1239	29.6469	40.8552
RGD1566189	0.97535	0.938634	0.924426	1.23896	1.08655	0.663702
Map1lc3b	66.7595	77.1931	79.1657	77.4509	77.7669	78.9523
Acsl5	49.8611	44.0046	44.2003	45.1908	42.3657	57.609
Steap3	11.8019	21.053	17.4277	16.8589	17.3521	19.1744
Gclm	32.0266	75.2267	64.4467	64.0415	52.6064	70.4629
Ncoa4	64.3476	129.401	116.207	117.814	103.182	118.609
Slc3a2	44.9183	83.418	68.8519	71.8856	69.6947	74.32
Slc40a1	65.027	89.4773	80.8891	92.3818	71.6679	95.1425
RGD1560687	2.63634	2.43726	2.71662	2.5397	2.17549	4.40941
Acsl1	22.2079	25.0941	22.553	26.827	25.3295	25.6292
Acsl4	5.84202	6.25794	5.77686	7.04737	6.20823	6.66689
Vdac3	86.2305	94.2173	88.218	97.7429	96.412	105.901
LOC120102993	0.78028	1.46662	0.984067	1.62244	0.998454	1.20673
Alox15	22.8689	153.041	86.2702	108.956	89.4532	150.009
Sat2	2.12258	3.22605	3.95363	3.1555	3.73122	3.96947
Slc11a2	6.96453	16.3321	13.6227	15.8861	14.1176	15.4049
Tfrc	113.165	242.618	172.026	247.576	203.484	198.207
Inhca	6.08626	20.8639	15.3799	19.5739	15.2237	20.7497
Gpx4	122.756	130.728	118.45	134.486	167.831	145.317
Prnp	17.1473	38.2246	37.0702	37.4183	39.4937	43.1477
Fth1	1060.46	1380.72	1314.64	1455.49	1545.29	1579.39
Map1lc3a	68.1003	56.0908	51.3326	69.8879	85.7522	60.7525
Ftl1	1300.58	1622.47	1544.68	1842.81	1756.1	1946.18
LOC100362384	11.0403	13.7982	10.4132	14.7847	14.125	16.0198
Slc39a8	12.9967	14.7988	15.847	19.6945	18.1855	18.1521
Hmox1	29.8876	63.9888	68.2668	101.986	62.282	80.8441
Slc39a14	6.41378	4.85037	7.33484	9.67551	11.1803	5.89561
LOC100359668	2.5544	2.91722	1.27527	2.84578	3.15425	3.96047
LOC100360087	6.06559	7.42271	7.39821	8.89931	9.23813	10.8077
Acsl6	0.0205076	0.101762	0.117562	0.30702	0.514029	0.133206
Ftl1l1	0.908333	1.11219	1.01167	1.56002	1.61161	1.95664

## Sheet: Table S3
Table S3. Summary of UKBPPP exposure data with F-statistics in the present study.
Source.Name	chr.exposure	pos.exposure	ID	other_allele.exposure	effect_allele.exposure	eaf.exposure	INFO	samplesize.exposure	TEST	beta.exposure	se.exposure	CHISQ	LOG10P	EXTRA	pval.exposure	exposure	SNP	R2	F
A1BG_P04217_OID30771_v1_Inflammation_II_expo_rt.txt	chr19	57479588	19:57990956:A:G:imp:v1	A	G	0.971101	0.974356	33995	ADD	0.138139	0.0215053	41.261	9.87549	NA	1.33e-10	A1BG	rs2885060	0.00121227	41.2587
A1BG_P04217_OID30771_v1_Inflammation_II_expo_rt.txt	chr19	57758313	19:58269681:G:A:imp:v1	G	A	0.0189756	0.979013	33995	ADD	-0.149098	0.0263334	32.0577	7.8249	NA	1.5e-08	A1BG	rs114853328	0.000942118	32.0556
A1BG_P04217_OID30771_v1_Inflammation_II_expo_rt.txt	chr19	58206880	19:58718247:T:C:imp:v1	T	C	0.0578173	1.00019	33995	ADD	-0.19073	0.0152322	156.788	35.2445	NA	5.7e-36	A1BG	rs45601339	0.00459092	156.779
A1BG_P04217_OID30771_v1_Inflammation_II_expo_rt.txt	chr19	58239047	19:58750413:C:T:imp:v1	C	T	0.394685	0.997575	33995	ADD	0.0402654	0.00728189	30.5756	7.49336	NA	3.21e-08	A1BG	rs8111222	0.000898608	30.5739
A1BG_P04217_OID30771_v1_Inflammation_II_expo_rt.txt	chr19	58247309	19:58758675:T:C:imp:v1	T	C	0.0199208	0.944073	33995	ADD	-0.14887	0.0261886	32.3139	7.88215	NA	1.31e-08	A1BG	rs146670855	0.000949647	32.312
A1BG_P04217_OID30771_v1_Inflammation_II_expo_rt.txt	chr19	58299461	19:58810827:G:T:imp:v1	G	T	0.0250954	0.95957	33995	ADD	-0.25967	0.0232088	125.181	28.333	NA	4.65e-29	A1BG	rs73570604	0.00366882	125.174
A1BG_P04217_OID30771_v1_Inflammation_II_expo_rt.txt	chr19	58347310	19:58858676:A:G:imp:v1	A	G	0.952234	0.997477	33995	ADD	0.297273	0.0166904	317.232	70.2362	NA	5.8e-71	A1BG	rs1265957	0.00924546	317.214
A1BG_P04217_OID30771_v1_Inflammation_II_expo_rt.txt	chr19	58363342	19:58874709:C:T:imp:v1	C	T	0.078074	0.961096	33995	ADD	-0.0886414	0.0135155	43.0137	10.2647	NA	5.44e-11	A1BG	rs7245923	0.0012637	43.0114
A1BG_P04217_OID30771_v1_Inflammation_II_expo_rt.txt	chr19	58377074	19:58888441:A:T:imp:v1	A	T	0.41911	1.00098	33995	ADD	0.0726998	0.0071995	101.967	23.2484	NA	5.64e-24	A1BG	rs8106477	0.00299052	101.961
A1BG_P04217_OID30771_v1_Inflammation_II_expo_rt.txt	chr19	58455277	19:58966644:A:T:imp:v1	A	T	0.183974	0.949817	33995	ADD	-0.0799453	0.00941235	72.1423	16.6985	NA	2e-17	A1BG	rs60037165	0.00211765	72.138
A1BG_P04217_OID30771_v1_Inflammation_II_expo_rt.txt	chr19	58521385	19:59032752:G:A:imp:v1	G	A	0.938802	0.802546	33995	ADD	0.190452	0.016556	132.329	29.8971	NA	1.27e-30	A1BG	rs7260485	0.00387755	132.323
AAMDC_Q9H7C9_OID30236_v1_Cardiometabolic_II_expo_rt.txt	chr11	76967227	11:76678271:T:C:imp:v1	T	C	0.740308	0.993046	33042	ADD	0.107713	0.00868885	153.677	34.5646	NA	2.73e-35	AAMDC	rs11237042	0.00462946	153.669
AAMDC_Q9H7C9_OID30236_v1_Cardiometabolic_II_expo_rt.txt	chr11	76969508	11:76680552:T:C:imp:v1	T	C	0.734722	0.985075	33042	ADD	0.111902	0.00866466	166.791	37.4299	NA	3.72e-38	AAMDC	rs10899336	0.0050225	166.781
AAMDC_Q9H7C9_OID30236_v1_Cardiometabolic_II_expo_rt.txt	chr11	77003689	11:76714733:A:C:imp:v1	A	C	0.0298777	0.969694	33042	ADD	-0.124649	0.0226481	30.2908	7.42959	NA	3.72e-08	AAMDC	rs116873354	0.000915904	30.2892
AAMDC_Q9H7C9_OID30236_v1_Cardiometabolic_II_expo_rt.txt	chr11	77046308	11:76757355:C:A:imp:v1	C	A	0.279708	0.974508	33042	ADD	-0.0691047	0.00856865	65.0414	15.1346	NA	7.34e-16	AAMDC	rs7104919	0.00196458	65.0375
AAMDC_Q9H7C9_OID30236_v1_Cardiometabolic_II_expo_rt.txt	chr11	77047555	11:76758602:CT:C:imp:v1	CT	C	0.299439	0.868223	33042	ADD	0.0527914	0.00889535	35.2209	8.53114	NA	2.94e-09	AAMDC	rs78477352	0.00106481	35.2188
AAMDC_Q9H7C9_OID30236_v1_Cardiometabolic_II_expo_rt.txt	chr11	77062117	11:76773164:C:T:imp:v1	C	T	0.0254474	0.945956	33042	ADD	-0.392062	0.024793	250.063	55.5994	NA	2.52e-56	AAMDC	rs148128720	0.00751122	250.049
AAMDC_Q9H7C9_OID30236_v1_Cardiometabolic_II_expo_rt.txt	chr11	77091428	11:76802474:T:C:imp:v1	T	C	0.229828	0.985362	33042	ADD	-0.0982821	0.00908891	116.93	26.5267	NA	2.97e-27	AAMDC	rs3781686	0.00352635	116.923
AAMDC_Q9H7C9_OID30236_v1_Cardiometabolic_II_expo_rt.txt	chr11	77101910	11:76812956:G:A:imp:v1	G	A	0.0881408	0.948205	33042	ADD	-0.145601	0.0137509	112.117	25.4726	NA	3.37e-26	AAMDC	rs12417314	0.00338165	112.109
AAMDC_Q9H7C9_OID30236_v1_Cardiometabolic_II_expo_rt.txt	chr11	77122292	11:76833338:T:C:imp:v1	T	C	0.294389	0.986582	33042	ADD	0.0535609	0.0083866	40.7873	9.77023	NA	1.7e-10	AAMDC	rs4945146	0.00123288	40.7847
AAMDC_Q9H7C9_OID30236_v1_Cardiometabolic_II_expo_rt.txt	chr11	77126506	11:76837552:C:T:imp:v1	C	T	0.0831669	0.995022	33042	ADD	-0.225609	0.0137803	268.036	59.517	NA	3.04e-60	AAMDC	rs10899353	0.00804675	268.021
AAMDC_Q9H7C9_OID30236_v1_Cardiometabolic_II_expo_rt.txt	chr11	77131323	11:76842369:C:A:imp:v1	C	A	0.200204	0.970872	33042	ADD	0.0881522	0.00963027	83.7894	19.2593	NA	5.5e-20	AAMDC	rs67953300	0.00252943	83.7844
AAMDC_Q9H7C9_OID30236_v1_Cardiometabolic_II_expo_rt.txt	chr11	77151659	11:76862705:A:G:imp:v1	A	G	0.122389	0.989046	33042	ADD	0.0740333	0.0116482	40.3957	9.68319	NA	2.07e-10	AAMDC	rs35831542	0.00122107	40.3934
AAMDC_Q9H7C9_OID30236_v1_Cardiometabolic_II_expo_rt.txt	chr11	77170942	11:76881988:C:T:imp:v1	C	T	0.280721	0.965631	33042	ADD	-0.166215	0.00860016	373.532	82.4968	NA	3.19e-83	AAMDC	rs11607721	0.0111784	373.509
AAMDC_Q9H7C9_OID30236_v1_Cardiometabolic_II_expo_rt.txt	chr11	77185922	11:76896967:AT:A:imp:v1	AT	A	0.114902	0.75591	33042	ADD	-0.131859	0.0136965	92.6837	21.2121	NA	6.14e-22	AAMDC	rs375787810	0.00279716	92.6774
AAMDC_Q9H7C9_OID30236_v1_Cardiometabolic_II_expo_rt.txt	chr11	77193145	11:76904190:C:G:imp:v1	C	G	0.287213	0.767863	33042	ADD	-0.0756388	0.00957684	62.3798	14.5479	NA	2.83e-15	AAMDC	rs61900021	0.00188434	62.3761
AAMDC_Q9H7C9_OID30236_v1_Cardiometabolic_II_expo_rt.txt	chr11	77237869	11:76948914:C:G:imp:v1	C	G	0.0904457	0.987883	33042	ADD	-0.658418	0.0133184	2444.01	532.502	NA	0	AAMDC	rs76470233	0.0688719	2443.84
AAMDC_Q9H7C9_OID30236_v1_Cardiometabolic_II_expo_rt.txt	chr11	77243853	11:76954898:A:G:imp:v1	A	G	0.467824	0.995389	33042	ADD	-0.139224	0.00763392	332.606	73.5849	NA	2.6e-74	AAMDC	rs7104577	0.00996591	332.588
AAMDC_Q9H7C9_OID30236_v1_Cardiometabolic_II_expo_rt.txt	chr11	77248284	11:76959329:C:T:imp:v1	C	T	0.57071	1.00369	33042	ADD	-0.114135	0.00765833	222.11	49.5038	NA	3.13e-50	AAMDC	rs7109758	0.00667719	222.097
AAMDC_Q9H7C9_OID30236_v1_Cardiometabolic_II_expo_rt.txt	chr11	77318223	11:77029268:C:T:imp:v1	C	T	0.100433	0.98617	33042	ADD	0.0860268	0.012718	45.7538	10.8726	NA	1.34e-11	AAMDC	rs61901805	0.00138281	45.7513
AAMDC_Q9H7C9_OID30236_v1_Cardiometabolic_II_expo_rt.txt	chr11	77429095	11:77140140:C:A:imp:v1	C	A	0.0951467	0.753231	33042	ADD	0.110661	0.0149144	55.053	12.9306	NA	1.17e-13	AAMDC	rs111660501	0.00166337	55.0492
AAMDC_Q9H7C9_OID30236_v1_Cardiometabolic_II_expo_rt.txt	chr11	77504240	11:77215285:A:G:imp:v1	A	G	0.416681	0.966895	33042	ADD	-0.132299	0.00783715	284.969	63.2073	NA	6.2e-64	AAMDC	rs3018475	0.00855069	284.951
AAMDC_Q9H7C9_OID30236_v1_Cardiometabolic_II_expo_rt.txt	chr11	77513473	11:77224518:A:C:imp:v1	A	C	0.939664	0.962455	33042	ADD	-0.100867	0.0162574	38.4947	9.26041	NA	5.49e-10	AAMDC	rs3018482	0.00116365	38.4919
AAMDC_Q9H7C9_OID30236_v1_Cardiometabolic_II_expo_rt.txt	chr11	77523173	11:77234218:C:T:imp:v1	C	T	0.656373	0.908143	33042	ADD	0.0732852	0.00839051	76.288	17.6105	NA	2.45e-18	AAMDC	rs2156844	0.0023035	76.2833
AAMDC_Q9H7C9_OID30236_v1_Cardiometabolic_II_expo_rt.txt	chr11	77527049	11:77238094:C:A:imp:v1	C	A	0.0114578	0.970567	33042	ADD	-0.987595	0.0362169	743.595	163.004	NA	9.91e-164	AAMDC	rs79453342	0.0220092	743.548
AAMDC_Q9H7C9_OID30236_v1_Cardiometabolic_II_expo_rt.txt	chr11	77546767	11:77257812:C:T:imp:v1	C	T	0.188649	0.740594	33042	ADD	-0.087937	0.0112742	60.8374	14.2077	NA	6.2e-15	AAMDC	rs375211102	0.00183783	60.8339
AAMDC_Q9H7C9_OID30236_v1_Cardiometabolic_II_expo_rt.txt	chr11	77554530	11:77265575:C:G:imp:v1	C	G	0.0154198	0.990319	33042	ADD	-0.943181	0.0309656	927.749	203.04	NA	9.12e-204	AAMDC	rs117532108	0.0273111	927.694
AAMDC_Q9H7C9_OID30236_v1_Cardiometabolic_II_expo_rt.txt	chr11	77596455	11:77307500:A:T:imp:v1	A	T	0.503519	0.89482	33042	ADD	0.209117	0.00803353	677.589	148.651	NA	2.23e-149	AAMDC	rs10899393	0.0200948	677.547
AAMDC_Q9H7C9_OID30236_v1_Cardiometabolic_II_expo_rt.txt	chr11	77626407	11:77337452:G:A:imp:v1	G	A	0.0521542	0.991155	33042	ADD	0.110751	0.0171589	41.66	9.96413	NA	1.09e-10	AAMDC	rs182863395	0.00125922	41.6572
AAMDC_Q9H7C9_OID30236_v1_Cardiometabolic_II_expo_rt.txt	chr11	77646768	11:77357813:C:A:imp:v1	C	A	0.0638511	0.847224	33042	ADD	0.127226	0.0168724	56.8585	13.3294	NA	4.68e-14	AAMDC	rs148716401	0.00171785	56.8554
AAMDC_Q9H7C9_OID30236_v1_Cardiometabolic_II_expo_rt.txt	chr11	77649706	11:77360751:G:T:imp:v1	G	T	0.343085	0.996265	33042	ADD	-0.324722	0.00801234	1642.49	358.369	NA	0	AAMDC	rs10899396	0.0473554	1642.4
AAMDC_Q9H7C9_OID30236_v1_Cardiometabolic_II_expo_rt.txt	chr11	77678724	11:77389769:T:C:imp:v1	T	C	0.0467928	0.966716	33042	ADD	0.122151	0.0182794	44.655	10.6289	NA	2.35e-11	AAMDC	rs78194335	0.00134964	44.6523
AAMDC_Q9H7C9_OID30236_v1_Cardiometabolic_II_expo_rt.txt	chr11	77689584	11:77400629:A:G:imp:v1	A	G	0.0779311	1.00224	33042	ADD	0.165997	0.0141436	137.746	31.0818	NA	8.28e-32	AAMDC	rs56028401	0.00415152	137.738
AAMDC_Q9H7C9_OID30236_v1_Cardiometabolic_II_expo_rt.txt	chr11	77699003	11:77410048:C:T:imp:v1	C	T	0.0657497	0.997122	33042	ADD	-1.00365	0.0153429	4279.11	931.11	NA	0	AAMDC	rs79819324	0.114656	4278.81
AAMDC_Q9H7C9_OID30236_v1_Cardiometabolic_II_expo_rt.txt	chr11	77752183	11:77463228:C:T:imp:v1	C	T	0.073892	0.972243	33042	ADD	0.161738	0.0147213	120.708	27.3538	NA	4.43e-28	AAMDC	rs61900163	0.00363984	120.7
AAMDC_Q9H7C9_OID30236_v1_Cardiometabolic_II_expo_rt.txt	chr11	77763464	11:77474509:G:C:imp:v1	G	C	0.0420847	0.97304	33042	ADD	0.13444	0.0191776	49.1441	11.6237	NA	2.38e-12	AAMDC	rs116945460	0.0014851	49.1408
AAMDC_Q9H7C9_OID30236_v1_Cardiometabolic_II_expo_rt.txt	chr11	77773413	11:77484459:G:A:imp:v1	G	A	0.09386	0.96008	33042	ADD	0.106433	0.0132879	64.156	14.9395	NA	1.15e-15	AAMDC	rs71469580	0.0019379	64.1525
AAMDC_Q9H7C9_OID30236_v1_Cardiometabolic_II_expo_rt.txt	chr11	77776559	11:77487605:T:C:imp:v1	T	C	0.036068	0.974199	33042	ADD	0.183614	0.0206326	79.1959	18.2499	NA	5.62e-19	AAMDC	rs72949667	0.0023911	79.1913
AAMDC_Q9H7C9_OID30236_v1_Cardiometabolic_II_expo_rt.txt	chr11	77878178	11:77589224:T:C:imp:v1	T	C	0.326363	0.907599	33042	ADD	0.126674	0.00849849	222.174	49.5177	NA	3.04e-50	AAMDC	rs12793631	0.00667905	222.16
AAMDC_Q9H7C9_OID30236_v1_Cardiometabolic_II_expo_rt.txt	chr11	77924011	11:77635057:C:G:imp:v1	C	G	0.0224896	0.876969	33042	ADD	0.185521	0.0273403	46.0448	10.9371	NA	1.16e-11	AAMDC	rs147194775	0.00139158	46.0419
AAMDC_Q9H7C9_OID30236_v1_Cardiometabolic_II_expo_rt.txt	chr11	77953652	11:77664698:C:T:imp:v1	C	T	0.064519	0.993265	33042	ADD	0.120841	0.0155064	60.7304	14.1841	NA	6.54e-15	AAMDC	rs71469599	0.00183461	60.7268
AAMDC_Q9H7C9_OID30236_v1_Cardiometabolic_II_expo_rt.txt	chr11	77972831	11:77683877:GT:G:imp:v1	GT	G	0.459293	0.966778	33042	ADD	0.185217	0.0077461	571.734	125.628	NA	2.36e-126	AAMDC	rs57723618	0.017009	571.701
AAMDC_Q9H7C9_OID30236_v1_Cardiometabolic_II_expo_rt.txt	chr11	77990815	11:77701861:T:A:imp:v1	T	A	0.506272	0.997672	33042	ADD	-0.255211	0.00760664	1125.68	246.062	NA	8.67e-247	AAMDC	rs3819256	0.0329456	1125.61
AAMDC_Q9H7C9_OID30236_v1_Cardiometabolic_II_expo_rt.txt	chr11	77993245	11:77704291:A:C:imp:v1	A	C	0.0421114	0.954395	33042	ADD	0.136819	0.019353	49.9801	11.8088	NA	1.55e-12	AAMDC	rs72941376	0.00151034	49.977
AAMDC_Q9H7C9_OID30236_v1_Cardiometabolic_II_expo_rt.txt	chr11	77997298	11:77708344:G:A:imp:v1	G	A	0.0822563	0.984609	33042	ADD	0.118668	0.013937	72.4986	16.7769	NA	1.67e-17	AAMDC	rs112937307	0.00218933	72.494
AAMDC_Q9H7C9_OID30236_v1_Cardiometabolic_II_expo_rt.txt	chr11	77997580	11:77708626:A:G:imp:v1	A	G	0.141639	0.944808	33042	ADD	0.128245	0.0112034	131.034	29.6136	NA	2.43e-30	AAMDC	rs111979010	0.00394999	131.025
AAMDC_Q9H7C9_OID30236_v1_Cardiometabolic_II_expo_rt.txt	chr11	78008762	11:77719808:G:C:imp:v1	G	C	0.334705	0.986697	33042	ADD	-0.315471	0.00809914	1517.2	331.144	NA	0	AAMDC	rs7931300	0.0439013	1517.1
AAMDC_Q9H7C9_OID30236_v1_Cardiometabolic_II_expo_rt.txt	chr11	78019218	11:77730264:T:G:imp:v1	T	G	0.230349	0.991337	33042	ADD	0.103748	0.00905252	131.347	29.6822	NA	2.08e-30	AAMDC	rs112365406	0.00395942	131.339
AAMDC_Q9H7C9_OID30236_v1_Cardiometabolic_II_expo_rt.txt	chr11	78026268	11:77737314:C:T:imp:v1	C	T	0.0795995	0.966036	33042	ADD	-0.315676	0.014271	489.297	107.693	NA	2.03e-108	AAMDC	rs4945239	0.0145923	489.269
AAMDC_Q9H7C9_OID30236_v1_Cardiometabolic_II_expo_rt.txt	chr11	78033122	11:77744168:A:T:imp:v1	A	T	0.0636369	0.93976	33042	ADD	0.122837	0.0160406	58.6436	13.7236	NA	1.89e-14	AAMDC	rs55808847	0.00177166	58.6396
AAMDC_Q9H7C9_OID30236_v1_Cardiometabolic_II_expo_rt.txt	chr11	78035139	11:77746185:G:C:imp:v1	G	C	0.436215	0.982725	33042	ADD	0.154151	0.00772467	398.229	87.8736	NA	1.34e-88	AAMDC	rs9651741	0.0119087	398.205
AAMDC_Q9H7C9_OID30236_v1_Cardiometabolic_II_expo_rt.txt	chr11	78055621	11:77766667:T:C:imp:v1	T	C	0.2623	0.767785	33042	ADD	0.119523	0.00985382	147.127	33.1331	NA	7.36e-34	AAMDC	rs7125460	0.004433	147.119
AAMDC_Q9H7C9_OID30236_v1_Cardiometabolic_II_expo_rt.txt	chr11	78099865	11:77810911:T:A:imp:v1	T	A	0.848922	0.989584	33042	ADD	0.36292	0.0106582	1159.46	253.404	NA	3.94e-254	AAMDC	rs645892	0.0339008	1159.39
AAMDC_Q9H7C9_OID30236_v1_Cardiometabolic_II_expo_rt.txt	chr11	78195340	11:77906386:T:G:imp:v1	T	G	0.758008	0.806656	33042	ADD	-0.0570269	0.00986645	33.407	8.12637	NA	7.48e-09	AAMDC	rs2450132	0.00101003	33.405
AAMDC_Q9H7C9_OID30236_v1_Cardiometabolic_II_expo_rt.txt	chr11	78219401	11:77930447:G:A:imp:v1	G	A	0.0292053	1.00087	33042	ADD	-0.702254	0.0225333	971.263	212.499	NA	3.17e-213	AAMDC	rs61749244	0.0285555	971.209
AAMDC_Q9H7C9_OID30236_v1_Cardiometabolic_II_expo_rt.txt	chr11	78253244	11:77964290:T:G:imp:v1	T	G	0.138799	0.956751	33042	ADD	0.0893004	0.0112286	63.2492	14.7396	NA	1.82e-15	AAMDC	rs56003293	0.00191055	63.2455
AAMDC_Q9H7C9_OID30236_v1_Cardiometabolic_II_expo_rt.txt	chr11	78294218	11:78005264:T:C:imp:v1	T	C	0.0166865	0.980737	33042	ADD	-0.667961	0.0299321	497.997	109.586	NA	2.59e-110	AAMDC	rs12416780	0.0148479	497.968
AAMDC_Q9H7C9_OID30236_v1_Cardiometabolic_II_expo_rt.txt	chr11	78415061	11:78126107:G:A:imp:v1	G	A	0.015531	0.974972	33042	ADD	-0.231763	0.0311059	55.514	13.0325	NA	9.28e-14	AAMDC	rs146777906	0.00167729	55.5107
AAMDC_Q9H7C9_OID30236_v1_Cardiometabolic_II_expo_rt.txt	chr11	78437974	11:78149020:C:CA:imp:v1	C	CA	0.560395	0.700217	33042	ADD	-0.0663218	0.00914191	52.6306	12.3952	NA	4.03e-13	AAMDC	rs373764208	0.00159031	52.6275
AAMDC_Q9H7C9_OID30236_v1_Cardiometabolic_II_expo_rt.txt	chr11	78461996	11:78173042:A:G:imp:v1	A	G	0.0855082	0.974757	33042	ADD	-0.289669	0.0137502	443.798	97.7922	NA	1.61e-98	AAMDC	rs17753334	0.0132533	443.772
AAMDC_Q9H7C9_OID30236_v1_Cardiometabolic_II_expo_rt.txt	chr11	78481813	11:78192859:T:A:imp:v1	T	A	0.0127324	0.971308	33042	ADD	-0.294208	0.0343515	73.3528	16.9648	NA	1.08e-17	AAMDC	rs112083647	0.00221507	73.3485
AAMDC_Q9H7C9_OID30236_v1_Cardiometabolic_II_expo_rt.txt	chr11	78491865	11:78202911:G:A:imp:v1	G	A	0.0569302	0.979212	33042	ADD	0.110292	0.0165587	44.3647	10.5645	NA	2.73e-11	AAMDC	rs12226618	0.00134087	44.3618
AAMDC_Q9H7C9_OID30236_v1_Cardiometabolic_II_expo_rt.txt	chr11	78504438	11:78215484:T:G:imp:v1	T	G	0.0107051	0.690395	33042	ADD	-0.355891	0.0444177	64.1982	14.9488	NA	1.13e-15	AAMDC	rs12277887	0.00193915	64.1942
AAMDC_Q9H7C9_OID30236_v1_Cardiometabolic_II_expo_rt.txt	chr11	78519537	11:78230583:G:C:imp:v1	G	C	0.0152836	0.996545	33042	ADD	-0.200996	0.0309944	42.0538	10.0516	NA	8.88e-11	AAMDC	rs117243587	0.00127113	42.0516
AAMDC_Q9H7C9_OID30236_v1_Cardiometabolic_II_expo_rt.txt	chr11	78575295	11:78286340:G:T:imp:v1	G	T	0.0736336	1.01058	33042	ADD	0.0818473	0.0144687	31.9998	7.81196	NA	1.54e-08	AAMDC	rs113402493	0.000967527	31.998
AAMDC_Q9H7C9_OID30236_v1_Cardiometabolic_II_expo_rt.txt	chr11	78648636	11:78359681:C:T:imp:v1	C	T	0.0146631	0.963393	33042	ADD	-0.3225	0.0321848	100.405	22.9059	NA	1.24e-23	AAMDC	rs139638975	0.00302952	100.399
AAMDC_Q9H7C9_OID30236_v1_Cardiometabolic_II_expo_rt.txt	chr11	78684171	11:78395216:C:T:imp:v1	C	T	0.34864	0.962595	33042	ADD	-0.0552435	0.0081211	46.2735	10.9878	NA	1.03e-11	AAMDC	rs4993013	0.00139849	46.2707
AAMDC_Q9H7C9_OID30236_v1_Cardiometabolic_II_expo_rt.txt	chr11	78698559	11:78409604:T:G:imp:v1	T	G	0.0154891	0.980693	33042	ADD	-0.263984	0.0310567	72.251	16.7224	NA	1.89e-17	AAMDC	rs17753788	0.00218187	72.2467
AAMDC_Q9H7C9_OID30236_v1_Cardiometabolic_II_expo_rt.txt	chr11	78703944	11:78414989:C:G:imp:v1	C	G	0.0328541	0.986484	33042	ADD	-0.20967	0.0214607	95.4518	21.8195	NA	1.52e-22	AAMDC	rs11607768	0.00288049	95.4462
AAMDC_Q9H7C9_OID30236_v1_Cardiometabolic_II_expo_rt.txt	chr11	78771068	11:78482113:G:A:imp:v1	G	A	0.100569	1.00295	33042	ADD	-0.175664	0.012603	194.276	43.4309	NA	3.71e-44	AAMDC	rs34863597	0.00584528	194.264
AAMDC_Q9H7C9_OID30236_v1_Cardiometabolic_II_expo_rt.txt	chr11	78772778	11:78483823:C:T:imp:v1	C	T	0.130459	0.991934	33042	ADD	-0.0721842	0.0113168	40.6855	9.7476	NA	1.79e-10	AAMDC	rs1970745	0.00122981	40.6828
AAMDC_Q9H7C9_OID30236_v1_Cardiometabolic_II_expo_rt.txt	chr11	78837089	11:78548134:G:C:imp:v1	G	C	0.449449	0.987099	33042	ADD	0.0653785	0.00768332	72.4055	16.7564	NA	1.75e-17	AAMDC	rs553604	0.00218653	72.4012
AARSD1_Q9BTE6_OID21311_v1_Oncology_expo_rt.txt	chr17	42927572	17:41079589:T:C:imp:v1	T	C	0.507428	0.857346	33533	ADD	-0.0434121	0.00778289	31.1129	7.61359	NA	2.43e-08	AARSD1	rs691801	0.000926968	31.111
AARSD1_Q9BTE6_OID21311_v1_Oncology_expo_rt.txt	chr17	42985119	17:41137136:T:C:imp:v1	T	C	0.199422	0.927165	33533	ADD	-0.0531904	0.00936907	32.231	7.86363	NA	1.37e-08	AARSD1	rs149951966	0.000960249	32.2291
AARSD1_Q9BTE6_OID21311_v1_Oncology_expo_rt.txt	chr17	42988528	17:41140545:C:T:imp:v1	C	T	0.289876	0.993105	33533	ADD	0.131661	0.00797006	272.891	60.5751	NA	2.66e-61	AARSD1	rs323500	0.00807233	272.876
AARSD1_Q9BTE6_OID21311_v1_Oncology_expo_rt.txt	chr17	43114980	17:41266997:C:T:imp:v1	C	T	0.0466406	1.00138	33533	ADD	0.111186	0.0170804	42.3742	10.1227	NA	7.54e-11	AARSD1	rs8176104	0.00126207	42.3719
AARSD1_Q9BTE6_OID21311_v1_Oncology_expo_rt.txt	chr17	43366279	17:41443647:T:G:imp:v1	T	G	0.0558099	0.973606	33533	ADD	0.094043	0.0159243	34.8763	8.45428	NA	3.51e-09	AARSD1	rs147832718	0.00103898	34.8744
AARSD1_Q9BTE6_OID21311_v1_Oncology_expo_rt.txt	chr17	43438559	17:41515927:G:A:imp:v1	G	A	0.167976	0.987488	33533	ADD	0.0609593	0.00970209	39.4774	9.47902	NA	3.32e-10	AARSD1	rs9903493	0.00117589	39.4751
AARSD1_Q9BTE6_OID21311_v1_Oncology_expo_rt.txt	chr17	43463160	17:41540528:G:A:imp:v1	G	A	0.48805	0.99365	33533	ADD	-0.055768	0.00723284	59.45	13.9016	NA	1.25e-14	AARSD1	rs12449433	0.00176975	59.4465
ABCA2_Q9BZC7_OID30146_v1_Cardiometabolic_II_expo_rt.txt	chr9	137019482	9:139913934:G:A:imp:v1	G	A	0.0867145	0.996378	32862	ADD	-0.10686	0.013609	61.6563	14.3883	NA	4.09e-15	ABCA2	rs35529305	0.00187271	61.6526
ABHD14B_Q96IU4_OID20921_v1_Neurology_expo_rt.txt	chr3	50963232	3:51000663:T:C:imp:v1	T	C	0.24408	0.989879	33375	ADD	-0.0779446	0.00882298	78.0444	17.9967	NA	1.01e-18	ABHD14B	rs66793762	0.00233295	78.0397
ABHD14B_Q96IU4_OID20921_v1_Neurology_expo_rt.txt	chr3	51096877	3:51134308:C:T:imp:v1	C	T	0.0157488	0.905303	33375	ADD	-0.41661	0.0318264	171.35	38.4257	NA	3.75e-39	ABHD14B	rs113284266	0.00510786	171.34
ABHD14B_Q96IU4_OID20921_v1_Neurology_expo_rt.txt	chr3	51099271	3:51136702:A:G:imp:v1	A	G	0.0226517	0.998478	33375	ADD	-0.51179	0.02535	407.593	89.912	NA	1.22e-90	ABHD14B	rs73087240	0.0120652	407.569
ABHD14B_Q96IU4_OID20921_v1_Neurology_expo_rt.txt	chr3	51777928	3:51811944:A:G:imp:v1	A	G	0.309786	0.957114	33375	ADD	-0.0669315	0.00833459	64.4901	15.0131	NA	9.7e-16	ABHD14B	rs13092298	0.00192856	64.4862
ABHD14B_Q96IU4_OID20921_v1_Neurology_expo_rt.txt	chr3	52010442	3:52044458:A:C:imp:v1	A	C	0.117473	0.961007	33375	ADD	-0.216973	0.0119418	330.121	73.0436	NA	9.04e-74	ABHD14B	rs148341748	0.00979436	330.1
ABHD14B_Q96IU4_OID20921_v1_Neurology_expo_rt.txt	chr3	52011357	3:52045373:C:T:imp:v1	C	T	0.184146	0.964316	33375	ADD	-0.103721	0.00990763	109.596	24.9203	NA	1.2e-25	ABHD14B	rs59076737	0.00327302	109.589
ABHD14B_Q96IU4_OID20921_v1_Neurology_expo_rt.txt	chr3	52052996	3:52087012:C:T:imp:v1	C	T	0.0110262	0.991599	33375	ADD	-1.23987	0.0362523	1169.71	255.631	NA	2.34e-256	ABHD14B	rs190682742	0.033861	1169.65
ABHD14B_Q96IU4_OID20921_v1_Neurology_expo_rt.txt	chr3	52163616	3:52197632:C:G:imp:v1	C	G	0.139172	0.983013	33375	ADD	-0.0792189	0.0109863	51.9939	12.2544	NA	5.57e-13	ABHD14B	rs62261069	0.00155546	51.9911
ABHD14B_Q96IU4_OID20921_v1_Neurology_expo_rt.txt	chr3	52178708	3:52212724:C:T:imp:v1	C	T	0.355081	0.829401	33375	ADD	-0.0637994	0.00864937	54.4081	12.7881	NA	1.63e-13	ABHD14B	rs3852071	0.00162755	54.4049
ABHD14B_Q96IU4_OID20921_v1_Neurology_expo_rt.txt	chr3	52268769	3:52302785:T:C:imp:v1	T	C	0.0856594	0.990648	33375	ADD	-0.135856	0.013529	100.838	23.0008	NA	9.98e-24	ABHD14B	rs76033947	0.00301228	100.832
ABHD14B_Q96IU4_OID20921_v1_Neurology_expo_rt.txt	chr3	52297798	3:52331814:G:A:imp:v1	G	A	0.0152659	1.00044	33375	ADD	-0.280219	0.0307367	83.1152	19.1112	NA	7.74e-20	ABHD14B	rs114665416	0.00248416	83.1103
ABHD14B_Q96IU4_OID20921_v1_Neurology_expo_rt.txt	chr3	52497665	3:52531681:G:A:imp:v1	G	A	0.0675252	0.981437	33375	ADD	-0.140965	0.0151598	86.4634	19.8466	NA	1.42e-20	ABHD14B	rs67749743	0.00258399	86.4589
ABHD14B_Q96IU4_OID20921_v1_Neurology_expo_rt.txt	chr3	52884986	3:52919002:T:C:imp:v1	T	C	0.253129	0.999651	33375	ADD	-0.0654659	0.00867199	56.9892	13.3583	NA	4.38e-14	ABHD14B	rs2878762	0.00170463	56.9858
ABL1_P00519_OID21280_v1_Oncology_expo_rt.txt	chr9	130885205	9:133760592:C:T:imp:v1	C	T	0.014016	1.00089	33533	ADD	-0.177497	0.0316278	31.495	7.69907	NA	2e-08	ABL1	rs2229067	0.000938348	31.4933
ACAA1_P09110_OID21269_v1_Oncology_expo_rt.txt	chr3	38125604	3:38167095:A:G:imp:v1	A	G	0.0421491	1.00417	32907	ADD	0.13251	0.0188999	49.1556	11.6263	NA	2.36e-12	ACAA1	rs2229528	0.00149156	49.1532
ACAA1_P09110_OID21269_v1_Oncology_expo_rt.txt	chr3	38126634	3:38168125:A:C:imp:v1	A	C	0.0439724	1.01111	32907	ADD	-0.205541	0.0184671	123.879	28.048	NA	8.95e-29	ACAA1	rs61095322	0.00375042	123.872
ACAA1_P09110_OID21269_v1_Oncology_expo_rt.txt	chr3	38129319	3:38170810:C:G:imp:v1	C	G	0.144316	1.00459	32907	ADD	-0.125267	0.0108057	134.391	30.3479	NA	4.49e-31	ACAA1	rs156265	0.00406733	134.382
ACAA1_P09110_OID21269_v1_Oncology_expo_rt.txt	chr3	38301088	3:38342579:G:A:imp:v1	G	A	0.341132	0.976979	32907	ADD	0.0589332	0.00812249	52.6431	12.3979	NA	4e-13	ACAA1	rs34064643	0.0015972	52.6399
ACAA1_P09110_OID21269_v1_Oncology_expo_rt.txt	chr3	38315246	3:38356737:G:A:imp:v1	G	A	0.213213	0.986988	32907	ADD	0.0558877	0.00935705	35.6742	8.63222	NA	2.33e-09	ACAA1	rs3828441	0.00108292	35.6721
ACADM_P11310_OID31277_v1_Oncology_II_expo_rt.txt	chr1	75662706	1:76128391:C:T:imp:v1	C	T	0.0295635	1.00927	33335	ADD	0.131034	0.0224818	33.9712	8.25232	NA	5.59e-09	ACADM	rs114326816	0.00101804	33.9688
ACADM_P11310_OID31277_v1_Oncology_II_expo_rt.txt	chr1	75724261	1:76189946:G:T:imp:v1	G	T	0.308149	1.00244	33335	ADD	0.142001	0.00828067	294.071	65.1904	NA	6.45e-66	ACADM	rs61797339	0.00874454	294.053
ACADM_P11310_OID31277_v1_Oncology_II_expo_rt.txt	chr1	75814060	1:76279745:C:T:imp:v1	C	T	0.0376393	0.991781	33335	ADD	0.110268	0.0201808	29.8557	7.33215	NA	4.65e-08	ACADM	rs5745366	0.000894814	29.8536
ACADM_P11310_OID31277_v1_Oncology_II_expo_rt.txt	chr1	75884075	1:76349760:A:G:imp:v1	A	G	0.0935691	0.985189	33335	ADD	-0.0816335	0.0132346	38.0464	9.16064	NA	6.91e-10	ACADM	rs5745488	0.00114004	38.0443
ACADM_P11310_OID31277_v1_Oncology_II_expo_rt.txt	chr1	75886001	1:76351686:G:A:imp:v1	G	A	0.121928	0.934851	33335	ADD	-0.0659416	0.0120914	29.7417	7.3066	NA	4.94e-08	ACADM	rs184243465	0.000891411	29.7399
ACADSB_P45954_OID30356_v1_Cardiometabolic_II_expo_rt.txt	chr10	122439199	10:124198715:C:T:imp:v1	C	T	0.0216639	0.980182	33942	ADD	0.160466	0.0261318	37.7074	9.08517	NA	8.22e-10	ACADSB	rs146200891	0.00110971	37.7052
ACADSB_P45954_OID30356_v1_Cardiometabolic_II_expo_rt.txt	chr10	122675338	10:124434854:T:C:imp:v1	T	C	0.0160863	0.931589	33942	ADD	0.272877	0.0310069	77.4492	17.8659	NA	1.36e-18	ACADSB	rs145663998	0.00227662	77.4447
ACADSB_P45954_OID30356_v1_Cardiometabolic_II_expo_rt.txt	chr10	122734486	10:124494002:T:C:imp:v1	T	C	0.0247872	0.89887	33942	ADD	0.22301	0.0255517	76.1746	17.5856	NA	2.6e-18	ACADSB	rs141096093	0.00223923	76.1699
ACADSB_P45954_OID30356_v1_Cardiometabolic_II_expo_rt.txt	chr10	122804055	10:124563571:G:A:imp:v1	G	A	0.0120693	0.983998	33942	ADD	0.262025	0.0347632	56.8128	13.3194	NA	4.79e-14	ACADSB	rs117755809	0.00167102	56.8094
ACADSB_P45954_OID30356_v1_Cardiometabolic_II_expo_rt.txt	chr10	122933070	10:124692586:A:G:imp:v1	A	G	0.577658	0.996704	33942	ADD	-0.0864271	0.00763809	128.035	28.9575	NA	1.1e-29	ACADSB	rs4980169	0.00375801	128.028
ACADSB_P45954_OID30356_v1_Cardiometabolic_II_expo_rt.txt	chr10	122965544	10:124725060:T:C:imp:v1	T	C	0.0253558	0.976646	33942	ADD	-0.136591	0.0242381	31.7576	7.7578	NA	1.75e-08	ACADSB	rs117037140	0.000934767	31.7557
ACADSB_P45954_OID30356_v1_Cardiometabolic_II_expo_rt.txt	chr10	123034081	10:124793597:A:G:imp:v1	A	G	0.161325	0.993842	33942	ADD	0.154179	0.0102692	225.411	50.2238	NA	5.97e-51	ACADSB	rs4980245	0.00659728	225.399
ACADSB_P45954_OID30356_v1_Cardiometabolic_II_expo_rt.txt	chr10	123035030	10:124794546:A:G:imp:v1	A	G	0.479345	0.98956	33942	ADD	0.0888341	0.00757802	137.42	31.0105	NA	9.76e-32	ACADSB	rs56959125	0.00403233	137.411
ACADSB_P45954_OID30356_v1_Cardiometabolic_II_expo_rt.txt	chr10	123039167	10:124798683:A:T:imp:v1	A	T	0.0846732	0.992167	33942	ADD	0.37434	0.0135833	759.49	166.46	NA	3.47e-167	ACADSB	rs7913063	0.0218864	759.445
ACADSB_P45954_OID30356_v1_Cardiometabolic_II_expo_rt.txt	chr10	123049975	10:124809491:T:C:imp:v1	T	C	0.113488	0.993512	33942	ADD	-0.20698	0.0119134	301.848	66.8849	NA	1.3e-67	ACADSB	rs28505323	0.0088146	301.828
ACADSB_P45954_OID30356_v1_Cardiometabolic_II_expo_rt.txt	chr10	123105698	10:124865214:C:T:imp:v1	C	T	0.200519	0.93569	33942	ADD	-0.0682189	0.00972316	49.2261	11.6419	NA	2.28e-12	ACADSB	rs11248392	0.0014482	49.2231
ACADSB_P45954_OID30356_v1_Cardiometabolic_II_expo_rt.txt	chr10	123109117	10:124868633:A:T:imp:v1	A	T	0.115956	0.951	33942	ADD	-0.0729165	0.0120585	36.565	8.83073	NA	1.48e-09	ACADSB	rs17104646	0.00107612	36.5628
ACADSB_P45954_OID30356_v1_Cardiometabolic_II_expo_rt.txt	chr10	123114960	10:124874476:G:A:imp:v1	G	A	0.0622961	0.971239	33942	ADD	0.15591	0.0158098	97.2507	22.2141	NA	6.11e-23	ACADSB	rs72840964	0.00285703	97.2455
ACADSB_P45954_OID30356_v1_Cardiometabolic_II_expo_rt.txt	chr10	123134176	10:124893692:A:G:imp:v1	A	G	0.334608	0.988803	33942	ADD	-0.0492048	0.00802651	37.5804	9.0569	NA	8.77e-10	ACADSB	rs4980266	0.00110597	37.5782
ACADSB_P45954_OID30356_v1_Cardiometabolic_II_expo_rt.txt	chr10	123138732	10:124898248:A:G:imp:v1	A	G	0.0174995	0.946052	33942	ADD	-0.165502	0.0295351	31.3999	7.67781	NA	2.1e-08	ACADSB	rs71486643	0.000924252	31.3981
ACADSB_P45954_OID30356_v1_Cardiometabolic_II_expo_rt.txt	chr10	123143228	10:124902744:T:C:imp:v1	T	C	0.360379	1.00433	33942	ADD	0.0440676	0.00782722	31.6973	7.74431	NA	1.8e-08	ACADSB	rs7902081	0.000932998	31.6955
ACAN_P16112_OID20159_v1_Cardiometabolic_expo_rt.txt	chr15	88636356	15:89179587:G:A:imp:v1	G	A	0.413338	0.96671	33424	ADD	-0.058424	0.00723779	65.1584	15.1604	NA	6.91e-16	ACAN	rs55877319	0.00194566	65.1545
ACAN_P16112_OID20159_v1_Cardiometabolic_expo_rt.txt	chr15	88667084	15:89210315:C:T:imp:v1	C	T	0.0158135	0.957311	33424	ADD	0.170372	0.0287199	35.1908	8.52442	NA	2.99e-09	ACAN	rs117886589	0.00105176	35.1888
ACAN_P16112_OID20159_v1_Cardiometabolic_expo_rt.txt	chr15	88679305	15:89222536:A:T:imp:v1	A	T	0.125135	0.998645	33424	ADD	-0.0988599	0.010603	86.9323	19.9496	NA	1.12e-20	ACAN	rs73458886	0.00259416	86.9274
ACAN_P16112_OID20159_v1_Cardiometabolic_expo_rt.txt	chr15	88710037	15:89253268:T:C:imp:v1	T	C	0.191085	1.0097	33424	ADD	0.134292	0.00887053	229.194	51.0488	NA	8.94e-52	ACAN	rs4932196	0.00681044	229.179
ACAN_P16112_OID20159_v1_Cardiometabolic_expo_rt.txt	chr15	88848471	15:89391702:C:T:imp:v1	C	T	0.0159441	0.981697	33424	ADD	-0.182576	0.0282461	41.7802	9.99083	NA	1.02e-10	ACAN	rs142050326	0.00124844	41.7777
ACE_P12821_OID30696_v1_Inflammation_II_expo_rt.txt	chr17	62544505	17:60621866:C:T:imp:v1	C	T	0.100294	0.994178	33985	ADD	-0.0907379	0.012546	52.3076	12.3237	NA	4.75e-13	ACE	rs72835242	0.00153678	52.3048
ACE_P12821_OID30696_v1_Inflammation_II_expo_rt.txt	chr17	62811257	17:60888618:A:G:imp:v1	A	G	0.0503457	1.00237	33985	ADD	0.10158	0.0171659	35.0176	8.48581	NA	3.27e-09	ACE	rs74540094	0.00102932	35.0153
ACE_P12821_OID30696_v1_Inflammation_II_expo_rt.txt	chr17	62825966	17:60903327:A:G:imp:v1	A	G	0.959578	0.913606	33985	ADD	-0.144735	0.0199652	52.5535	12.3781	NA	4.19e-13	ACE	rs4968636	0.00154398	52.5502
ACE_P12821_OID30696_v1_Inflammation_II_expo_rt.txt	chr17	62828828	17:60906189:G:A:imp:v1	G	A	0.0266925	0.851334	33985	ADD	-0.15976	0.0252702	39.9683	9.58819	NA	2.58e-10	ACE	rs146873596	0.00117468	39.9662
ACE_P12821_OID30696_v1_Inflammation_II_expo_rt.txt	chr17	62834089	17:60911450:A:G:imp:v1	A	G	0.0636578	0.882378	33985	ADD	-0.155644	0.0163844	90.2402	20.6759	NA	2.11e-21	ACE	rs143598183	0.00264828	90.2356
ACE_P12821_OID30696_v1_Inflammation_II_expo_rt.txt	chr17	62923714	17:61001075:T:A:imp:v1	T	A	0.0698832	0.988586	33985	ADD	0.145223	0.0148207	96.0135	21.9427	NA	1.14e-22	ACE	rs16946650	0.00281722	96.0081
ACE_P12821_OID30696_v1_Inflammation_II_expo_rt.txt	chr17	62992139	17:61069500:G:A:imp:v1	G	A	0.22184	0.986353	33985	ADD	-0.177305	0.00911068	378.74	83.6307	NA	2.34e-84	ACE	rs4968748	0.0110215	378.717
ACE_P12821_OID30696_v1_Inflammation_II_expo_rt.txt	chr17	63008278	17:61085639:C:T:imp:v1	C	T	0.0243637	0.994834	33985	ADD	-0.186014	0.0244428	57.9148	13.5627	NA	2.74e-14	ACE	rs72843153	0.00170123	57.9114
ACE_P12821_OID30696_v1_Inflammation_II_expo_rt.txt	chr17	63009712	17:61087073:A:G:imp:v1	A	G	0.19106	0.994557	33985	ADD	0.126554	0.00958472	174.338	39.0782	NA	8.35e-40	ACE	rs16946713	0.00510368	174.328
ACE_P12821_OID30696_v1_Inflammation_II_expo_rt.txt	chr17	63013165	17:61090526:C:T:imp:v1	C	T	0.0214654	0.999077	33985	ADD	-0.157762	0.0259404	36.9873	8.92481	NA	1.19e-09	ACE	rs76703981	0.00108716	36.985
ACE_P12821_OID30696_v1_Inflammation_II_expo_rt.txt	chr17	63297353	17:61374714:G:A:imp:v1	G	A	0.0461233	1.01117	33985	ADD	-0.14033	0.0178217	62.0013	14.4644	NA	3.43e-15	ACE	rs75168245	0.00182106	61.9979
ACE_P12821_OID30696_v1_Inflammation_II_expo_rt.txt	chr17	63311874	17:61389235:A:T:imp:v1	A	T	0.0140503	0.838091	33985	ADD	0.234625	0.0348821	45.2423	10.7592	NA	1.74e-11	ACE	rs117851947	0.00132947	45.2395
ACE_P12821_OID30696_v1_Inflammation_II_expo_rt.txt	chr17	63354615	17:61431976:C:T:imp:v1	C	T	0.0159176	0.964308	33985	ADD	-0.198014	0.0305758	41.9405	10.0264	NA	9.41e-11	ACE	rs183122021	0.00123258	41.9383
ACE_P12821_OID30696_v1_Inflammation_II_expo_rt.txt	chr17	63365469	17:61442830:T:C:imp:v1	T	C	0.111358	0.950356	33985	ADD	0.106947	0.0122548	76.1606	17.5825	NA	2.62e-18	ACE	rs1074637	0.00223597	76.1551
ACE_P12821_OID30696_v1_Inflammation_II_expo_rt.txt	chr17	63391956	17:61469317:A:G:imp:v1	A	G	0.0138303	0.866982	33985	ADD	-0.245861	0.0345529	50.6302	11.9527	NA	1.12e-12	ACE	rs184200529	0.00148757	50.6273
ACE_P12821_OID30696_v1_Inflammation_II_expo_rt.txt	chr17	63407684	17:61485045:C:T:imp:v1	C	T	0.122789	0.994154	33985	ADD	0.111717	0.0114857	94.6077	21.6343	NA	2.32e-22	ACE	rs17687734	0.00277606	94.6015
ACE_P12821_OID30696_v1_Inflammation_II_expo_rt.txt	chr17	63446736	17:61524097:C:T:imp:v1	C	T	0.0361641	0.886547	33985	ADD	0.119008	0.021378	30.99	7.58609	NA	2.59e-08	ACE	rs112305090	0.000911035	30.9879
ACE_P12821_OID30696_v1_Inflammation_II_expo_rt.txt	chr17	63452095	17:61529456:G:A:imp:v1	G	A	0.031404	0.902849	33985	ADD	-0.239003	0.0226835	111.016	25.2314	NA	5.87e-26	ACE	rs138691660	0.00325599	111.01
ACE_P12821_OID30696_v1_Inflammation_II_expo_rt.txt	chr17	63466988	17:61544349:T:G:imp:v1	T	G	0.202078	0.752045	33985	ADD	-0.186489	0.0107954	298.421	66.1381	NA	7.28e-67	ACE	rs11650201	0.00870452	298.403
ACE_P12821_OID30696_v1_Inflammation_II_expo_rt.txt	chr17	63468418	17:61545779:C:T:imp:v1	C	T	0.626506	0.986785	33985	ADD	-0.359973	0.00782152	2118.15	461.712	NA	0	ACE	rs6504163	0.0586695	2118.03
ACE_P12821_OID30696_v1_Inflammation_II_expo_rt.txt	chr17	63470992	17:61548353:C:T:imp:v1	C	T	0.0177238	0.971974	33985	ADD	-0.433835	0.0288838	225.6	50.2651	NA	5.43e-51	ACE	rs185105129	0.00659447	225.587
ACE_P12821_OID30696_v1_Inflammation_II_expo_rt.txt	chr17	63478323	17:61555684:C:T:imp:v1	C	T	0.0167563	0.937484	33985	ADD	-0.205724	0.0302284	46.3168	10.9974	NA	1.01e-11	ACE	rs12709419	0.00136101	46.3142
ACE_P12821_OID30696_v1_Inflammation_II_expo_rt.txt	chr17	63483656	17:61561017:C:T:imp:v1	C	T	0.0622481	1.00873	33985	ADD	0.0875204	0.0154907	31.9209	7.79431	NA	1.61e-08	ACE	rs4313	0.000938386	31.9191
ACE_P12821_OID30696_v1_Inflammation_II_expo_rt.txt	chr17	63493849	17:61571210:C:T:imp:v1	C	T	0.0199213	0.804625	33985	ADD	0.361424	0.029987	145.267	32.7263	NA	1.88e-33	ACE	rs12709437	0.00425626	145.259
ACE_P12821_OID30696_v1_Inflammation_II_expo_rt.txt	chr17	63498988	17:61576349:C:T:imp:v1	C	T	0.595484	0.954391	33985	ADD	-0.323126	0.00783986	1698.74	370.59	NA	0	ACE	rs4968650	0.0476055	1698.64
ACE_P12821_OID30696_v1_Inflammation_II_expo_rt.txt	chr17	63500451	17:61577812:C:T:imp:v1	C	T	0.0278516	0.943978	33985	ADD	0.206188	0.0235157	76.8794	17.7406	NA	1.82e-18	ACE	rs151029386	0.00225706	76.875
ACE_P12821_OID30696_v1_Inflammation_II_expo_rt.txt	chr17	63511904	17:61589265:T:C:imp:v1	T	C	0.589923	0.977259	33985	ADD	0.204485	0.00773159	699.497	153.415	NA	3.85e-154	ACE	rs8066276	0.0201674	699.455
ACE_P12821_OID30696_v1_Inflammation_II_expo_rt.txt	chr17	63515392	17:61592753:C:T:imp:v1	C	T	0.0397234	0.993346	33985	ADD	0.188331	0.0193137	95.0851	21.739	NA	1.82e-22	ACE	rs4277404	0.00279005	95.0795
ACE_P12821_OID30696_v1_Inflammation_II_expo_rt.txt	chr17	63530079	17:61607440:T:G:imp:v1	T	G	0.0485027	0.969761	33985	ADD	0.216416	0.0177638	148.424	33.4166	NA	3.83e-34	ACE	rs80311894	0.00434838	148.416
ACE_P12821_OID30696_v1_Inflammation_II_expo_rt.txt	chr17	63542154	17:61619515:G:C:imp:v1	G	C	0.0157849	0.876507	33985	ADD	0.252423	0.0321949	61.4727	14.3478	NA	4.49e-15	ACE	rs79634433	0.00180556	61.4693
ACE_P12821_OID30696_v1_Inflammation_II_expo_rt.txt	chr17	63544059	17:61621420:C:A:imp:v1	C	A	0.0317404	0.979044	33985	ADD	-0.184283	0.0216759	72.2795	16.7287	NA	1.87e-17	ACE	rs143048027	0.0021223	72.2754
ACE_P12821_OID30696_v1_Inflammation_II_expo_rt.txt	chr17	63559439	17:61636800:G:A:imp:v1	G	A	0.104948	0.779379	33985	ADD	0.190747	0.0138908	188.565	42.1844	NA	6.54e-43	ACE	rs55923561	0.00551786	188.554
ACE_P12821_OID30696_v1_Inflammation_II_expo_rt.txt	chr17	63559439	17:61636800:G:GTA:imp:v1	G	GTA	0.31299	0.959013	33985	ADD	0.227281	0.00827664	754.081	165.284	NA	5.2e-166	ACE	rs55923561	0.021707	754.037
ACE_P12821_OID30696_v1_Inflammation_II_expo_rt.txt	chr17	63567253	17:61644614:A:G:imp:v1	A	G	0.0118199	0.956589	33985	ADD	-0.276203	0.0355508	60.361	14.1026	NA	7.9e-15	ACE	rs72845880	0.00177297	60.3577
ACE_P12821_OID30696_v1_Inflammation_II_expo_rt.txt	chr17	63571809	17:61649170:G:A:imp:v1	G	A	0.0224765	0.939809	33985	ADD	0.277417	0.0261591	112.466	25.5491	NA	2.82e-26	ACE	rs142377191	0.00329836	112.459
ACE_P12821_OID30696_v1_Inflammation_II_expo_rt.txt	chr17	63589646	17:61667008:C:T:imp:v1	C	T	0.0563384	0.997936	33985	ADD	-0.144115	0.0163168	78.0097	17.9891	NA	1.03e-18	ACE	rs72845888	0.00229016	78.0051
ACE_P12821_OID30696_v1_Inflammation_II_expo_rt.txt	chr17	63634464	17:61711824:G:A:imp:v1	G	A	0.0260723	0.867542	33985	ADD	-0.162595	0.0253207	41.2349	9.8697	NA	1.35e-10	ACE	rs151245771	0.00121185	41.2323
ACE_P12821_OID30696_v1_Inflammation_II_expo_rt.txt	chr17	63643451	17:61720811:C:T:imp:v1	C	T	0.0249121	0.955027	33985	ADD	0.231438	0.0246747	87.9762	20.1788	NA	6.63e-21	ACE	rs113119439	0.002582	87.9711
ACE_P12821_OID30696_v1_Inflammation_II_expo_rt.txt	chr17	63725895	17:61803255:C:A:imp:v1	C	A	0.0337756	0.927308	33985	ADD	0.200004	0.0216085	85.6697	19.6724	NA	2.13e-20	ACE	rs137988421	0.00251448	85.6648
ACE_P12821_OID30696_v1_Inflammation_II_expo_rt.txt	chr17	63728167	17:61805527:C:T:imp:v1	C	T	0.027967	0.923838	33985	ADD	0.245888	0.0237219	107.442	24.4483	NA	3.56e-25	ACE	rs71377705	0.0031515	107.436
ACE_P12821_OID30696_v1_Inflammation_II_expo_rt.txt	chr17	63735635	17:61812995:T:G:imp:v1	T	G	0.64039	1.01139	33985	ADD	-0.140432	0.00778968	325.006	71.9294	NA	1.18e-72	ACE	rs6504179	0.00947266	324.988
ACE_P12821_OID30696_v1_Inflammation_II_expo_rt.txt	chr17	63782411	17:61859771:AG:A:imp:v1	AG	A	0.0765596	0.827851	33985	ADD	-0.194828	0.0155388	157.205	35.3357	NA	4.62e-36	ACE	rs190565036	0.00460443	157.196
ACE_P12821_OID30696_v1_Inflammation_II_expo_rt.txt	chr17	63888852	17:61966212:C:T:imp:v1	C	T	0.95643	0.954829	33985	ADD	0.239621	0.0188498	161.598	36.2956	NA	5.06e-37	ACE	rs2727298	0.00473248	161.589
ACE_P12821_OID30696_v1_Inflammation_II_expo_rt.txt	chr17	63911604	17:61988964:C:A:imp:v1	C	A	0.0150453	0.888174	33985	ADD	-0.191623	0.032748	34.2394	8.31219	NA	4.87e-09	ACE	rs142489515	0.00100647	34.2374
ACE_P12821_OID30696_v1_Inflammation_II_expo_rt.txt	chr17	63912127	17:61989487:T:G:imp:v1	T	G	0.0258637	0.856293	33985	ADD	-0.224858	0.0255857	77.2364	17.8191	NA	1.52e-18	ACE	rs144289679	0.00226751	77.2319
ACE_P12821_OID30696_v1_Inflammation_II_expo_rt.txt	chr17	63971107	17:62048467:A:G:imp:v1	A	G	0.898866	0.982525	33985	ADD	-0.0955144	0.0125772	57.6728	13.5093	NA	3.1e-14	ACE	rs2302236	0.00169413	57.6692
ACE_P12821_OID30696_v1_Inflammation_II_expo_rt.txt	chr17	63999129	17:62076489:C:T:imp:v1	C	T	0.0113243	0.848531	33985	ADD	0.236838	0.0385482	37.7481	9.09422	NA	8.05e-10	ACE	rs3181028	0.0011095	37.7458
ACE_P12821_OID30696_v1_Inflammation_II_expo_rt.txt	chr17	64009967	17:62087327:C:T:imp:v1	C	T	0.017116	0.867911	33985	ADD	0.215056	0.0310988	47.8206	11.3306	NA	4.67e-12	ACE	rs116960479	0.00140514	47.8179
ACE_P12821_OID30696_v1_Inflammation_II_expo_rt.txt	chr17	64011027	17:62088387:A:C:imp:v1	A	C	0.0255296	0.935737	33985	ADD	-0.162376	0.0246332	43.4509	10.3618	NA	4.35e-11	ACE	rs75163181	0.00127691	43.4487
ACE_P12821_OID30696_v1_Inflammation_II_expo_rt.txt	chr17	64031609	17:62108969:A:T:imp:v1	A	T	0.0320617	0.934879	33985	ADD	0.138714	0.0220706	39.5015	9.48439	NA	3.28e-10	ACE	rs112148318	0.00116097	39.4991
ACE_P12821_OID30696_v1_Inflammation_II_expo_rt.txt	chr17	64084573	17:62161933:A:G:imp:v1	A	G	0.0892305	1.00667	33985	ADD	0.107114	0.013144	66.4104	15.4363	NA	3.66e-16	ACE	rs11869535	0.0019503	66.4067
ACE_P12821_OID30696_v1_Inflammation_II_expo_rt.txt	chr17	64097600	17:62174960:C:T:imp:v1	C	T	0.0343028	0.973204	33985	ADD	-0.127529	0.0209273	37.1359	8.95791	NA	1.1e-09	ACE	rs2270524	0.00109152	37.1335
ACE_P12821_OID30696_v1_Inflammation_II_expo_rt.txt	chr17	64125768	17:62203128:C:T:imp:v1	C	T	0.140758	0.958271	33985	ADD	0.065771	0.0110402	35.4905	8.59125	NA	2.56e-09	ACE	rs57676627	0.00104322	35.4886
ACE_P12821_OID30696_v1_Inflammation_II_expo_rt.txt	chr17	64215762	17:62293122:A:G:imp:v1	A	G	0.777434	0.986886	33985	ADD	0.0975376	0.00909772	114.942	26.0913	NA	8.1e-27	ACE	rs940744	0.00337074	114.935
ACE_P12821_OID30696_v1_Inflammation_II_expo_rt.txt	chr17	64304354	17:62381714:T:C:imp:v1	T	C	0.593093	0.988105	33985	ADD	0.0448221	0.00769475	33.9309	8.24333	NA	5.71e-09	ACE	rs6504213	0.000997412	33.9289
ACE_P12821_OID30696_v1_Inflammation_II_expo_rt.txt	chr17	64314175	17:62391535:G:A:imp:v1	G	A	0.055243	0.99005	33985	ADD	0.115765	0.016534	49.023	11.5969	NA	2.53e-12	ACE	rs9908411	0.00144041	49.02
ACE_P12821_OID30696_v1_Inflammation_II_expo_rt.txt	chr17	64506899	17:62503017:C:T:imp:v1	C	T	0.0186257	0.746039	33985	ADD	-0.179596	0.0321741	31.1588	7.62385	NA	2.38e-08	ACE	rs186346374	0.000915999	31.157
ACHE_P22303_OID30585_v1_Inflammation_II_expo_rt.txt	chr7	99924066	7:99521689:T:C:imp:v1	T	C	0.0407539	0.999137	33187	ADD	0.149687	0.0182726	67.1071	15.5898	NA	2.57e-16	ACHE	rs75126895	0.002018	67.1029
ACHE_P22303_OID30585_v1_Inflammation_II_expo_rt.txt	chr7	99980544	7:99578167:T:G:imp:v1	T	G	0.100778	0.808187	33187	ADD	-0.0814147	0.0133493	37.1955	8.97119	NA	1.07e-09	ACHE	rs13309270	0.00111953	37.1931
ACHE_P22303_OID30585_v1_Inflammation_II_expo_rt.txt	chr7	99984576	7:99582199:C:T:imp:v1	C	T	0.68905	0.98651	33187	ADD	0.114516	0.00785244	212.678	47.4463	NA	3.58e-48	ACHE	rs6955111	0.00636767	212.665
ACHE_P22303_OID30585_v1_Inflammation_II_expo_rt.txt	chr7	100131419	7:99729042:C:T:imp:v1	C	T	0.159725	0.736804	33187	ADD	0.0748106	0.0114817	42.4533	10.1403	NA	7.24e-11	ACHE	rs188562843	0.00127759	42.451
ACHE_P22303_OID30585_v1_Inflammation_II_expo_rt.txt	chr7	100188127	7:99785750:C:T:imp:v1	C	T	0.168867	0.956629	33187	ADD	-0.118249	0.00985235	144.05	32.4603	NA	3.46e-33	ACHE	rs4727449	0.00432182	144.042
ACHE_P22303_OID30585_v1_Inflammation_II_expo_rt.txt	chr7	100214213	7:99811836:A:T:imp:v1	A	T	0.714531	0.95609	33187	ADD	-0.148627	0.0081789	330.221	73.0654	NA	8.6e-74	ACHE	rs1052482	0.0098523	330.202
ACHE_P22303_OID30585_v1_Inflammation_II_expo_rt.txt	chr7	100381444	7:99979067:CA:C:imp:v1	CA	C	0.565393	0.888308	33187	ADD	-0.0804329	0.00772624	108.376	24.6529	NA	2.22e-25	ACHE	rs76265518	0.00325497	108.369
ACHE_P22303_OID30585_v1_Inflammation_II_expo_rt.txt	chr7	100431812	7:100029435:C:T:imp:v1	C	T	0.0137849	0.962617	33187	ADD	0.22564	0.0315643	51.1022	12.0571	NA	8.77e-13	ACHE	rs77227535	0.00153746	51.0992
ACHE_P22303_OID30585_v1_Inflammation_II_expo_rt.txt	chr7	100608083	7:100205706:G:C:imp:v1	G	C	0.0142717	0.880779	33187	ADD	-0.188245	0.0324409	33.6713	8.18538	NA	6.53e-09	ACHE	rs61739556	0.00101357	33.6694
ACHE_P22303_OID30585_v1_Inflammation_II_expo_rt.txt	chr7	100645788	7:100243411:T:C:imp:v1	T	C	0.213071	0.986908	33187	ADD	-0.123181	0.00887814	192.505	43.0445	NA	9.03e-44	ACHE	rs10953299	0.00576718	192.494
ACHE_P22303_OID30585_v1_Inflammation_II_expo_rt.txt	chr7	100650654	7:100248277:T:C:imp:v1	T	C	0.0610254	0.969674	33187	ADD	0.18587	0.0153192	147.213	33.1519	NA	7.05e-34	ACHE	rs75277881	0.00441628	147.204
ACHE_P22303_OID30585_v1_Inflammation_II_expo_rt.txt	chr7	100653746	7:100251369:G:A:imp:v1	G	A	0.0359629	0.999199	33187	ADD	0.257901	0.0194072	176.596	39.5712	NA	2.68e-40	ACHE	rs62482245	0.00529307	176.585
ACHE_P22303_OID30585_v1_Inflammation_II_expo_rt.txt	chr7	100691506	7:100289129:A:ATTTTTTT:imp:v1	A	ATTTTTTT	0.8666	0.942007	33187	ADD	-0.0741596	0.0109424	45.9309	10.9119	NA	1.22e-11	ACHE	rs373188781	0.00138211	45.9286
ACHE_P22303_OID30585_v1_Inflammation_II_expo_rt.txt	chr7	100714499	7:100312122:A:G:imp:v1	A	G	0.0307241	0.92468	33187	ADD	-0.192417	0.021762	78.1788	18.0263	NA	9.41e-19	ACHE	rs539540	0.00235017	78.1741
ACHE_P22303_OID30585_v1_Inflammation_II_expo_rt.txt	chr7	100736034	7:100333657:G:T:imp:v1	G	T	0.0320401	0.850245	33187	ADD	-0.141025	0.0222442	40.1936	9.63828	NA	2.3e-10	ACHE	rs74895811	0.00120966	40.1913
ACHE_P22303_OID30585_v1_Inflammation_II_expo_rt.txt	chr7	100745552	7:100343175:C:G:imp:v1	C	G	0.0713382	1.04872	33187	ADD	-0.199201	0.0136946	211.584	47.2076	NA	6.2e-48	ACHE	rs221834	0.00633514	211.572
ACHE_P22303_OID30585_v1_Inflammation_II_expo_rt.txt	chr7	100753973	7:100351596:C:T:imp:v1	C	T	0.0157497	0.793866	33187	ADD	0.199917	0.0325412	37.7424	9.09296	NA	8.07e-10	ACHE	rs145369881	0.00113598	37.7404
ACHE_P22303_OID30585_v1_Inflammation_II_expo_rt.txt	chr7	100777447	7:100375069:G:C:imp:v1	G	C	0.0121826	0.986755	33187	ADD	-0.244419	0.0331459	54.3763	12.7811	NA	1.66e-13	ACHE	rs113748373	0.0016358	54.3731
ACHE_P22303_OID30585_v1_Inflammation_II_expo_rt.txt	chr7	100781652	7:100379274:CT:C:imp:v1	CT	C	0.102855	0.752047	33187	ADD	0.0878419	0.0137043	41.0853	9.83645	NA	1.46e-10	ACHE	rs78060887	0.00123647	41.0831
ACHE_P22303_OID30585_v1_Inflammation_II_expo_rt.txt	chr7	100787750	7:100385372:C:T:imp:v1	C	T	0.037033	0.941668	33187	ADD	0.130419	0.0197118	43.7756	10.4338	NA	3.68e-11	ACHE	rs113804968	0.00131731	43.7727
ACHE_P22303_OID30585_v1_Inflammation_II_expo_rt.txt	chr7	100825448	7:100423070:C:T:imp:v1	C	T	0.0131542	0.911621	33187	ADD	0.482603	0.0331951	211.365	47.1598	NA	6.92e-48	ACHE	rs147588410	0.00632859	211.352
ACHE_P22303_OID30585_v1_Inflammation_II_expo_rt.txt	chr7	100830163	7:100427785:C:T:imp:v1	C	T	0.0256604	0.920329	33187	ADD	0.216424	0.0238023	82.675	19.0145	NA	9.67e-20	ACHE	rs191121916	0.00248499	82.6698
ACHE_P22303_OID30585_v1_Inflammation_II_expo_rt.txt	chr7	100834812	7:100432434:G:A:imp:v1	G	A	0.0164092	0.845647	33187	ADD	-0.261429	0.0308949	71.6033	16.5799	NA	2.63e-17	ACHE	rs143228326	0.00215293	71.5991
ACHE_P22303_OID30585_v1_Inflammation_II_expo_rt.txt	chr7	100835564	7:100433186:C:T:imp:v1	C	T	0.233401	1.00155	33187	ADD	0.175908	0.00853529	424.751	93.6467	NA	2.26e-94	ACHE	rs2571609	0.012637	424.726
ACHE_P22303_OID30585_v1_Inflammation_II_expo_rt.txt	chr7	100848615	7:100446237:A:G:imp:v1	A	G	0.0386183	0.986372	33187	ADD	-0.129849	0.0188625	47.3891	11.235	NA	5.82e-12	ACHE	rs117450257	0.00142591	47.3863
ACHE_P22303_OID30585_v1_Inflammation_II_expo_rt.txt	chr7	100850823	7:100448445:T:G:imp:v1	T	G	0.476713	0.98734	33187	ADD	0.303196	0.00727726	1735.84	378.651	NA	0	ACHE	rs314368	0.0497052	1735.74
ACHE_P22303_OID30585_v1_Inflammation_II_expo_rt.txt	chr7	100864068	7:100461690:C:T:imp:v1	C	T	0.0209264	0.954806	33187	ADD	0.37559	0.0258209	211.586	47.2081	NA	6.19e-48	ACHE	rs117717323	0.00633516	211.572
ACHE_P22303_OID30585_v1_Inflammation_II_expo_rt.txt	chr7	100867496	7:100465118:C:T:imp:v1	C	T	0.0215773	0.949014	33187	ADD	-0.232697	0.0255186	83.151	19.1191	NA	7.6e-20	ACHE	rs11539289	0.00249927	83.1461
ACHE_P22303_OID30585_v1_Inflammation_II_expo_rt.txt	chr7	100873714	7:100471336:C:T:imp:v1	C	T	0.0458111	0.936025	33187	ADD	-0.181657	0.0178512	103.554	23.5961	NA	2.53e-24	ACHE	rs148092638	0.00311063	103.548
ACHE_P22303_OID30585_v1_Inflammation_II_expo_rt.txt	chr7	100880699	7:100478320:C:G:imp:v1	C	G	0.0151074	0.918715	33187	ADD	0.278314	0.0308924	81.165	18.6827	NA	2.08e-19	ACHE	rs138529245	0.00243971	81.1597
ACHE_P22303_OID30585_v1_Inflammation_II_expo_rt.txt	chr7	100888664	7:100486285:G:T:imp:v1	G	T	0.0205502	1.00447	33187	ADD	-0.156211	0.0253968	37.8326	9.11304	NA	7.71e-10	ACHE	rs137910416	0.00113868	37.8302
ACHE_P22303_OID30585_v1_Inflammation_II_expo_rt.txt	chr7	100905680	7:100503300:G:A:imp:v1	G	A	0.0198033	0.986772	33187	ADD	-0.196269	0.026092	56.5833	13.2687	NA	5.39e-14	ACHE	rs55754661	0.00170208	56.5799
ACHE_P22303_OID30585_v1_Inflammation_II_expo_rt.txt	chr7	100910276	7:100507896:A:G:imp:v1	A	G	0.0356314	0.998129	33187	ADD	0.219997	0.0194893	127.421	28.8232	NA	1.5e-29	ACHE	rs4727468	0.0038248	127.413
ACHE_P22303_OID30585_v1_Inflammation_II_expo_rt.txt	chr7	100911043	7:100508663:T:C:imp:v1	T	C	0.0293325	0.940395	33187	ADD	0.170173	0.0220723	59.4412	13.8996	NA	1.26e-14	ACHE	rs143669824	0.00178789	59.4374
ACHE_P22303_OID30585_v1_Inflammation_II_expo_rt.txt	chr7	100912833	7:100510453:G:A:imp:v1	G	A	0.0433612	0.7902	33187	ADD	0.174895	0.0199403	76.9296	17.7516	NA	1.77e-18	ACHE	rs58374260	0.00231269	76.9246
ACHE_P22303_OID30585_v1_Inflammation_II_expo_rt.txt	chr7	100913752	7:100511372:G:A:imp:v1	G	A	0.0268499	0.914441	33187	ADD	-0.178715	0.0233536	58.5617	13.7055	NA	1.97e-14	ACHE	rs117117110	0.00176149	58.5583
ACHE_P22303_OID30585_v1_Inflammation_II_expo_rt.txt	chr7	100927996	7:100525616:A:C:imp:v1	A	C	0.0135462	0.91793	33187	ADD	0.30381	0.0326056	86.8199	19.9249	NA	1.19e-20	ACHE	rs192278269	0.00260926	86.8148
ACHE_P22303_OID30585_v1_Inflammation_II_expo_rt.txt	chr7	100928683	7:100526303:T:G:imp:v1	T	G	0.246786	0.858232	33187	ADD	-0.141569	0.00904059	245.212	54.5417	NA	2.87e-55	ACHE	rs111728617	0.00733462	245.198
ACHE_P22303_OID30585_v1_Inflammation_II_expo_rt.txt	chr7	100938425	7:100536054:C:T:imp:v1	C	T	0.204441	0.996163	33187	ADD	0.287737	0.0089701	1028.95	225.039	NA	9.14e-226	ACHE	rs62483665	0.0300724	1028.89
ACHE_P22303_OID30585_v1_Inflammation_II_expo_rt.txt	chr7	100946831	7:100544462:G:A:imp:v1	G	A	0.116884	0.986745	33187	ADD	-0.224823	0.0113168	394.672	87.0992	NA	7.96e-88	ACHE	rs4131224	0.0117525	394.646
ACHE_P22303_OID30585_v1_Inflammation_II_expo_rt.txt	chr7	100949552	7:100547184:C:G:imp:v1	C	G	0.0229513	0.959652	33187	ADD	0.348472	0.0246183	200.365	44.7597	NA	1.74e-45	ACHE	rs79952768	0.00600119	200.352
ACHE_P22303_OID30585_v1_Inflammation_II_expo_rt.txt	chr7	100961440	7:100553569:T:G:imp:v1	T	G	0.0407397	0.988829	33187	ADD	-0.20926	0.0183666	129.811	29.3462	NA	4.51e-30	ACHE	rs371233303	0.00389629	129.804
ACHE_P22303_OID30585_v1_Inflammation_II_expo_rt.txt	chr7	100972662	7:100615943:T:A:imp:v1	T	A	0.0212322	0.911875	33187	ADD	-0.225479	0.0262387	73.846	17.0734	NA	8.45e-18	ACHE	rs117751419	0.00222021	73.8417
ACHE_P22303_OID30585_v1_Inflammation_II_expo_rt.txt	chr7	100995879	7:100639160:C:T:imp:v1	C	T	0.260772	0.945816	33187	ADD	-0.0980034	0.00845839	134.248	30.3168	NA	4.82e-31	ACHE	rs200381069	0.00402889	134.24
ACHE_P22303_OID30585_v1_Inflammation_II_expo_rt.txt	chr7	101019688	7:100662969:G:A:imp:v1	G	A	0.202821	0.995034	33187	ADD	0.0574535	0.00900378	40.7177	9.75476	NA	1.76e-10	ACHE	rs6973913	0.00122541	40.7152
ACHE_P22303_OID30585_v1_Inflammation_II_expo_rt.txt	chr7	101058395	7:100701676:C:T:imp:v1	C	T	0.122499	0.979367	33187	ADD	0.0754628	0.011128	45.987	10.9243	NA	1.19e-11	ACHE	rs76767333	0.00138376	45.9839
ACHE_P22303_OID30585_v1_Inflammation_II_expo_rt.txt	chr7	101135963	7:100779244:C:T:imp:v1	C	T	0.0779729	0.978266	33187	ADD	0.0760641	0.0136156	31.2096	7.63524	NA	2.32e-08	ACHE	rs2227692	0.000939528	31.2076
ACHE_P22303_OID30585_v1_Inflammation_II_expo_rt.txt	chr7	101154993	7:100798274:C:G:imp:v1	C	G	0.753786	0.993341	33187	ADD	0.061463	0.00841451	53.3543	12.5552	NA	2.78e-13	ACHE	rs6970645	0.00160511	53.3511
ACHE_P22303_OID30585_v1_Inflammation_II_expo_rt.txt	chr7	101207378	7:100850659:A:G:imp:v1	A	G	0.0992395	1.00729	33187	ADD	0.0846985	0.0120321	49.5528	11.7142	NA	1.93e-12	ACHE	rs7802724	0.00149091	49.5499
ACHE_P22303_OID30585_v1_Inflammation_II_expo_rt.txt	chr7	101279696	7:100922977:T:C:imp:v1	T	C	0.0556543	0.943932	33187	ADD	-0.110021	0.0162097	46.0681	10.9423	NA	1.14e-11	ACHE	rs868606	0.00138622	46.0654
ACHE_P22303_OID30585_v1_Inflammation_II_expo_rt.txt	chr7	101350168	7:100993449:C:G:imp:v1	C	G	0.0115006	0.881804	33187	ADD	0.221731	0.0360556	37.8189	9.10999	NA	7.76e-10	ACHE	rs148374877	0.00113827	37.8165
ACOT13_Q9NPJ3_OID31522_v1_Oncology_II_expo_rt.txt	chr6	24653338	6:24653566:G:A:imp:v1	G	A	0.0106657	0.935268	33796	ADD	0.28174	0.0379843	55.016	12.9225	NA	1.2e-13	ACOT13	rs17243374	0.00162524	55.0127
ACOT13_Q9NPJ3_OID31522_v1_Oncology_II_expo_rt.txt	chr6	24675404	6:24675632:T:A:imp:v1	T	A	0.236794	0.989019	33796	ADD	0.0675648	0.00892358	57.3275	13.433	NA	3.69e-14	ACOT13	rs9358791	0.00169341	57.3241
ACOT13_Q9NPJ3_OID31522_v1_Oncology_II_expo_rt.txt	chr6	24682169	6:24682397:T:A:imp:v1	T	A	0.0153659	0.971283	33796	ADD	-0.206934	0.0311522	44.125	10.5114	NA	3.08e-11	ACOT13	rs112965562	0.00130393	44.1225
ACOX1_Q15067_OID20124_v1_Cardiometabolic_expo_rt.txt	chr17	75955783	17:73951864:T:C:imp:v1	T	C	0.65913	0.986341	33693	ADD	0.0776409	0.00808345	92.2545	21.118	NA	7.62e-22	ACOX1	rs10852766	0.00273062	92.249
ACP1_P24666_OID30524_v1_Inflammation_II_expo_rt.txt	chr2	38021	2:38021:C:T:imp:v1	C	T	0.0230355	0.784857	32981	ADD	-0.185617	0.0283495	42.869	10.2326	NA	5.85e-11	ACP1	rs113895774	0.00129813	42.8665
ACP1_P24666_OID30524_v1_Inflammation_II_expo_rt.txt	chr2	91076	2:91076:C:T:imp:v1	C	T	0.061256	0.84769	32981	ADD	-0.135336	0.0170621	62.9155	14.666	NA	2.16e-15	ACP1	rs118063885	0.00190401	62.9123
ACP1_P24666_OID30524_v1_Inflammation_II_expo_rt.txt	chr2	101861	2:101861:T:C:imp:v1	T	C	0.0645858	0.898751	32981	ADD	0.156571	0.0161759	93.6885	21.4326	NA	3.69e-22	ACP1	rs62116680	0.00283263	93.6827
ACP1_P24666_OID30524_v1_Inflammation_II_expo_rt.txt	chr2	104036	2:104036:T:C:imp:v1	T	C	0.0390356	0.97891	32981	ADD	-0.252086	0.0196659	164.313	36.8886	NA	1.29e-37	ACP1	rs74487397	0.00495733	164.302
ACP1_P24666_OID30524_v1_Inflammation_II_expo_rt.txt	chr2	165280	2:165280:T:C:imp:v1	T	C	0.017464	0.960219	32981	ADD	-0.1658	0.02935	31.9121	7.79235	NA	1.61e-08	ACP1	rs138033122	0.000966649	31.91
ACP1_P24666_OID30524_v1_Inflammation_II_expo_rt.txt	chr2	191395	2:191395:G:A:imp:v1	G	A	0.056749	0.962922	32981	ADD	0.0937966	0.0165937	31.9514	7.80113	NA	1.58e-08	ACP1	rs79003624	0.00096784	31.9493
ACP1_P24666_OID30524_v1_Inflammation_II_expo_rt.txt	chr2	193991	2:193991:T:C:imp:v1	T	C	0.222987	0.93627	32981	ADD	-0.132542	0.00935515	200.726	44.8386	NA	1.45e-45	ACP1	rs17041717	0.00604932	200.715
ACP1_P24666_OID30524_v1_Inflammation_II_expo_rt.txt	chr2	211317	2:211317:C:T:imp:v1	C	T	0.353079	0.997351	32981	ADD	-0.361553	0.0078955	2096.93	457.101	NA	0	ACP1	rs62114494	0.0597793	2096.81
ACP1_P24666_OID30524_v1_Inflammation_II_expo_rt.txt	chr2	220548	2:220548:G:A:imp:v1	G	A	0.066935	0.999521	32981	ADD	0.0950087	0.0150805	39.6912	9.52657	NA	2.97e-10	ACP1	rs72772884	0.00120201	39.6889
ACP1_P24666_OID30524_v1_Inflammation_II_expo_rt.txt	chr2	226243	2:226243:T:C:imp:v1	T	C	0.0204767	0.914006	32981	ADD	0.160041	0.0278251	33.0816	8.05369	NA	8.84e-09	ACP1	rs144639455	0.00100205	33.0798
ACP1_P24666_OID30524_v1_Inflammation_II_expo_rt.txt	chr2	226594	2:226594:C:T:imp:v1	C	T	0.0440649	0.892783	32981	ADD	-0.283323	0.0194332	212.557	47.42	NA	3.8e-48	ACP1	rs80161081	0.00640356	212.544
ACP1_P24666_OID30524_v1_Inflammation_II_expo_rt.txt	chr2	256414	2:256414:G:A:imp:v1	G	A	0.0519944	0.907442	32981	ADD	0.70087	0.0178077	1549.03	338.061	NA	0	ACP1	rs71437291	0.0448603	1548.93
ACP1_P24666_OID30524_v1_Inflammation_II_expo_rt.txt	chr2	262119	2:262119:T:C:imp:v1	T	C	0.114813	0.988394	32981	ADD	0.0859788	0.0118925	52.2683	12.315	NA	4.84e-13	ACP1	rs79975915	0.00158229	52.2649
ACP1_P24666_OID30524_v1_Inflammation_II_expo_rt.txt	chr2	270849	2:270849:T:TTTTG:imp:v1	T	TTTTG	0.89613	1.00422	32981	ADD	-0.11734	0.0123227	90.6734	20.7709	NA	1.69e-21	ACP1	rs372415406	0.00274173	90.668
ACP1_P24666_OID30524_v1_Inflammation_II_expo_rt.txt	chr2	277314	2:277314:G:A:imp:v1	G	A	0.0469968	0.999428	32981	ADD	-0.247403	0.0178104	192.957	43.1432	NA	7.19e-44	ACP1	rs77927634	0.00581655	192.946
ACP1_P24666_OID30524_v1_Inflammation_II_expo_rt.txt	chr2	308955	2:308955:C:G:imp:v1	C	G	0.219255	0.71637	32981	ADD	-0.0840827	0.0107649	61.0085	14.2454	NA	5.68e-15	ACP1	rs6725374	0.0018464	61.0052
ACP1_P24666_OID30524_v1_Inflammation_II_expo_rt.txt	chr2	309480	2:309480:G:A:imp:v1	G	A	0.343654	0.74474	32981	ADD	0.0723008	0.00919236	61.8632	14.434	NA	3.68e-15	ACP1	rs6717613	0.00187221	61.8594
ACP1_P24666_OID30524_v1_Inflammation_II_expo_rt.txt	chr2	310687	2:310687:A:G:imp:v1	A	G	0.830381	0.926459	32981	ADD	-0.123078	0.0104296	139.258	31.4126	NA	3.87e-32	ACP1	rs6754607	0.00420467	139.251
ACP1_P24666_OID30524_v1_Inflammation_II_expo_rt.txt	chr2	320574	2:320574:T:C:imp:v1	T	C	0.577893	0.995415	32981	ADD	0.0759968	0.0076463	98.7842	22.5504	NA	2.82e-23	ACP1	rs6719944	0.00298624	98.7783
ACP1_P24666_OID30524_v1_Inflammation_II_expo_rt.txt	chr2	323401	2:323401:G:A:imp:v1	G	A	0.0962069	0.998164	32981	ADD	0.089094	0.0127937	48.4959	11.4802	NA	3.31e-12	ACP1	rs6711315	0.00146826	48.4929
ACP1_P24666_OID30524_v1_Inflammation_II_expo_rt.txt	chr2	349977	2:349977:G:A:imp:v1	G	A	0.087403	0.863701	32981	ADD	0.223083	0.0143579	241.409	53.7125	NA	1.94e-54	ACP1	rs62117005	0.00726641	241.393
ACP1_P24666_OID30524_v1_Inflammation_II_expo_rt.txt	chr2	350582	2:350582:T:C:imp:v1	T	C	0.0607981	0.87601	32981	ADD	-0.182178	0.016855	116.825	26.5036	NA	3.14e-27	ACP1	rs115627107	0.00352968	116.818
ACP1_P24666_OID30524_v1_Inflammation_II_expo_rt.txt	chr2	350837	2:350837:C:CA:imp:v1	C	CA	0.548352	0.77349	32981	ADD	-0.0510706	0.00861169	35.1694	8.51966	NA	3.02e-09	ACP1	rs76143752	0.00106522	35.1673
ACP1_P24666_OID30524_v1_Inflammation_II_expo_rt.txt	chr2	355375	2:355375:C:T:imp:v1	C	T	0.020427	0.925524	32981	ADD	-0.187592	0.02768	45.9298	10.9116	NA	1.23e-11	ACP1	rs143198549	0.00139068	45.9272
ACP1_P24666_OID30524_v1_Inflammation_II_expo_rt.txt	chr2	362911	2:362911:C:T:imp:v1	C	T	0.0251891	0.902129	32981	ADD	0.182915	0.0253102	52.2285	12.3062	NA	4.94e-13	ACP1	rs35284269	0.00158109	52.2253
ACP1_P24666_OID30524_v1_Inflammation_II_expo_rt.txt	chr2	395708	2:395708:T:C:imp:v1	T	C	0.150663	1.0053	32981	ADD	-0.0708587	0.0105122	45.4361	10.8022	NA	1.58e-11	ACP1	rs76433480	0.00137574	45.4331
ACP1_P24666_OID30524_v1_Inflammation_II_expo_rt.txt	chr2	403269	2:403269:C:A:imp:v1	C	A	0.0554687	0.957637	32981	ADD	0.101168	0.0168252	36.1546	8.7393	NA	1.82e-09	ACP1	rs12614257	0.00109503	36.1526
ACP1_P24666_OID30524_v1_Inflammation_II_expo_rt.txt	chr2	426575	2:426575:A:C:imp:v1	A	C	0.282993	0.845374	32981	ADD	0.0734628	0.00909766	65.2043	15.1705	NA	6.75e-16	ACP1	rs13021693	0.00197312	65.2002
ACP1_P24666_OID30524_v1_Inflammation_II_expo_rt.txt	chr2	443196	2:443196:C:T:imp:v1	C	T	0.0448648	1.00278	32981	ADD	0.163339	0.0181793	80.7277	18.5866	NA	2.59e-19	ACP1	rs34521596	0.00244174	80.7233
ACP1_P24666_OID30524_v1_Inflammation_II_expo_rt.txt	chr2	449787	2:449787:A:G:imp:v1	A	G	0.253864	0.981646	32981	ADD	-0.093731	0.00874483	114.885	26.0789	NA	8.34e-27	ACP1	rs6732624	0.00347128	114.878
ACP1_P24666_OID30524_v1_Inflammation_II_expo_rt.txt	chr2	598093	2:598093:G:A:imp:v1	G	A	0.162078	0.993215	32981	ADD	-0.0726081	0.0102583	50.0979	11.8349	NA	1.46e-12	ACP1	rs72778227	0.00151669	50.0948
ACP1_P24666_OID30524_v1_Inflammation_II_expo_rt.txt	chr2	598598	2:598598:A:G:imp:v1	A	G	0.38909	0.97866	32981	ADD	-0.0640013	0.00781485	67.0712	15.5819	NA	2.62e-16	ACP1	rs13016713	0.00202951	67.0672
ACP1_P24666_OID30524_v1_Inflammation_II_expo_rt.txt	chr2	618902	2:618902:G:T:imp:v1	G	T	0.398866	0.974395	32981	ADD	-0.0735545	0.00779374	89.0691	20.4188	NA	3.81e-21	ACP1	rs6709135	0.00269334	89.0636
ACP1_P24666_OID30524_v1_Inflammation_II_expo_rt.txt	chr2	713578	2:713578:C:CT:imp:v1	C	CT	0.447404	0.890871	32981	ADD	-0.0472702	0.00802844	34.6667	8.40752	NA	3.91e-09	ACP1	rs191933278	0.00105001	34.6646
ACP1_P24666_OID30524_v1_Inflammation_II_expo_rt.txt	chr2	736426	2:736426:A:C:imp:v1	A	C	0.238573	0.972078	32981	ADD	-0.0602929	0.00897268	45.1532	10.7394	NA	1.82e-11	ACP1	rs6754300	0.00136719	45.1504
ACP5_P13686_OID20314_v1_Cardiometabolic_expo_rt.txt	chr19	11173716	19:11284392:C:T:imp:v1	C	T	0.0265208	0.877471	33896	ADD	-0.155293	0.0237973	42.5842	10.1694	NA	6.77e-11	ACP5	rs139198665	0.00125474	42.5817
ACP5_P13686_OID20314_v1_Cardiometabolic_expo_rt.txt	chr19	11273608	19:11384284:C:CTTCCTTCCTTCT:imp:v1	C	CTTCCTTCCTTCT	0.462964	0.737233	33896	ADD	-0.0521438	0.00836242	38.8814	9.34644	NA	4.5e-10	ACP5	rs397003	0.00114576	38.8791
ACP5_P13686_OID20314_v1_Cardiometabolic_expo_rt.txt	chr19	11299152	19:11409828:G:C:imp:v1	G	C	0.0267755	0.934492	33896	ADD	-0.133596	0.0229569	33.8657	8.22877	NA	5.91e-09	ACP5	rs150858048	0.00099811	33.8637
ACP5_P13686_OID20314_v1_Cardiometabolic_expo_rt.txt	chr19	11325800	19:11436476:G:A:imp:v1	G	A	0.0538803	0.937497	33896	ADD	0.106775	0.0163849	42.4668	10.1433	NA	7.19e-11	ACP5	rs117570571	0.00125129	42.4645
ACP5_P13686_OID20314_v1_Cardiometabolic_expo_rt.txt	chr19	11362682	19:11473358:C:G:imp:v1	C	G	0.0766462	1.00245	33896	ADD	-0.0902056	0.013452	44.9669	10.6981	NA	2e-11	ACP5	rs11540666	0.00132486	44.9643
ACP5_P13686_OID20314_v1_Cardiometabolic_expo_rt.txt	chr19	11386851	19:11497527:T:C:imp:v1	T	C	0.234913	0.895145	33896	ADD	-0.0832971	0.00893186	86.9713	19.9582	NA	1.1e-20	ACP5	rs11673556	0.00255926	86.9662
ACP5_P13686_OID20314_v1_Cardiometabolic_expo_rt.txt	chr19	11387662	19:11498338:T:G:imp:v1	T	G	0.123808	0.880459	33896	ADD	0.107909	0.011597	86.5819	19.8727	NA	1.34e-20	ACP5	rs12978096	0.00254781	86.5762
ACP5_P13686_OID20314_v1_Cardiometabolic_expo_rt.txt	chr19	11417672	19:11528348:A:G:imp:v1	A	G	0.877267	0.876683	33896	ADD	0.0802238	0.011663	47.3136	11.2183	NA	6.05e-12	ACP5	rs316501	0.0013939	47.3108
ACP5_P13686_OID20314_v1_Cardiometabolic_expo_rt.txt	chr19	11419282	19:11529958:C:T:imp:v1	C	T	0.34914	0.778865	33896	ADD	0.0710757	0.00851267	69.7124	16.1636	NA	6.86e-17	ACP5	rs1549168	0.00205244	69.7084
ACP5_P13686_OID20314_v1_Cardiometabolic_expo_rt.txt	chr19	11436685	19:11547506:C:T:imp:v1	C	T	0.141818	0.982053	33896	ADD	0.089645	0.01036	74.8743	17.2996	NA	5.02e-18	ACP5	rs56015835	0.00220407	74.8699
ACP5_P13686_OID20314_v1_Cardiometabolic_expo_rt.txt	chr19	11485224	19:11596039:G:A:imp:v1	G	A	0.0229351	0.812704	33896	ADD	-0.152939	0.0265399	33.2076	8.08183	NA	8.28e-09	ACP5	rs118038330	0.000978733	33.2057
ACP5_P13686_OID20314_v1_Cardiometabolic_expo_rt.txt	chr19	11513034	19:11623849:C:G:imp:v1	C	G	0.0791096	1.02181	33896	ADD	-0.136313	0.0131315	107.757	24.5174	NA	3.04e-25	ACP5	rs12609928	0.00316898	107.751
ACP5_P13686_OID20314_v1_Cardiometabolic_expo_rt.txt	chr19	11515204	19:11626019:C:T:imp:v1	C	T	0.0362088	0.863742	33896	ADD	0.25301	0.0206455	150.185	33.8015	NA	1.58e-34	ACP5	rs376974828	0.00441119	150.175
ACP5_P13686_OID20314_v1_Cardiometabolic_expo_rt.txt	chr19	11515394	19:11626209:G:A:imp:v1	G	A	0.0107531	0.889151	33896	ADD	-0.496921	0.0368251	182.09	40.771	NA	1.69e-41	ACP5	rs113554396	0.00534333	182.08
ACP5_P13686_OID20314_v1_Cardiometabolic_expo_rt.txt	chr19	11533234	19:11644049:T:TTTTA:imp:v1	T	TTTTA	0.501019	0.836351	33896	ADD	-0.0448466	0.00783438	32.7679	7.98361	NA	1.04e-08	ACP5	rs377188609	0.000965788	32.7661
ACP5_P13686_OID20314_v1_Cardiometabolic_expo_rt.txt	chr19	11560489	19:11671304:C:T:imp:v1	C	T	0.771817	0.991693	33896	ADD	0.174068	0.0085733	412.23	90.9212	NA	1.2e-91	ACP5	rs35863302	0.0120155	412.208
ACP5_P13686_OID20314_v1_Cardiometabolic_expo_rt.txt	chr19	11563394	19:11674209:G:A:imp:v1	G	A	0.0113908	0.860595	33896	ADD	0.262254	0.036398	51.9145	12.2368	NA	5.8e-13	ACP5	rs146240790	0.00152924	51.9115
ACP5_P13686_OID20314_v1_Cardiometabolic_expo_rt.txt	chr19	11569122	19:11679937:G:A:imp:v1	G	A	0.307068	0.812695	33896	ADD	-0.0706932	0.00861499	67.3357	15.6402	NA	2.29e-16	ACP5	rs80132751	0.0019826	67.3318
ACP5_P13686_OID20314_v1_Cardiometabolic_expo_rt.txt	chr19	11573034	19:11683849:G:A:imp:v1	G	A	0.119306	0.97574	33896	ADD	-0.48273	0.0111908	1860.73	405.786	NA	0	ACP5	rs149642807	0.0520389	1860.63
ACP5_P13686_OID20314_v1_Cardiometabolic_expo_rt.txt	chr19	11595843	19:11706658:C:G:imp:v1	C	G	0.267778	0.993425	33896	ADD	0.27991	0.0081238	1187.18	259.429	NA	3.72e-260	ACP5	rs10403399	0.0338391	1187.11
ACP5_P13686_OID20314_v1_Cardiometabolic_expo_rt.txt	chr19	11628733	19:11739548:C:T:imp:v1	C	T	0.56624	0.995086	33896	ADD	-0.146296	0.00724606	407.624	89.9187	NA	1.21e-90	ACP5	rs4804617	0.0118829	407.601
ACP5_P13686_OID20314_v1_Cardiometabolic_expo_rt.txt	chr19	11630468	19:11741283:A:G:imp:v1	A	G	0.0169418	0.948445	33896	ADD	0.359879	0.0285151	159.281	35.7893	NA	1.62e-36	ACP5	rs143186713	0.00467712	159.271
ACP5_P13686_OID20314_v1_Cardiometabolic_expo_rt.txt	chr19	11644952	19:11755767:G:A:imp:v1	G	A	0.0459641	0.994879	33896	ADD	0.169133	0.0171489	97.2713	22.2186	NA	6.05e-23	ACP5	rs72999181	0.00286148	97.2654
ACP5_P13686_OID20314_v1_Cardiometabolic_expo_rt.txt	chr19	11676197	19:11787012:T:G:imp:v1	T	G	0.118686	0.968373	33896	ADD	-0.208052	0.0112645	341.131	75.4415	NA	3.62e-76	ACP5	rs112052371	0.00996374	341.11
ACP5_P13686_OID20314_v1_Cardiometabolic_expo_rt.txt	chr19	11706260	19:11817075:G:T:imp:v1	G	T	0.305173	0.893199	33896	ADD	-0.157071	0.00823209	364.058	80.434	NA	3.68e-81	ACP5	rs389175	0.0106263	364.038
ACP5_P13686_OID20314_v1_Cardiometabolic_expo_rt.txt	chr19	11706280	19:11817095:T:C:imp:v1	T	C	0.0192047	0.903261	33896	ADD	-0.259843	0.0274634	89.5184	20.5174	NA	3.04e-21	ACP5	rs389786	0.00263402	89.5134
ACP5_P13686_OID20314_v1_Cardiometabolic_expo_rt.txt	chr19	11714115	19:11824930:T:A:imp:v1	T	A	0.372551	0.965264	33896	ADD	-0.121389	0.0075441	258.909	57.5276	NA	2.97e-58	ACP5	rs35762844	0.00758038	258.892
ACP5_P13686_OID20314_v1_Cardiometabolic_expo_rt.txt	chr19	11774593	19:11885408:C:T:imp:v1	C	T	0.0110776	0.957508	33896	ADD	-0.410247	0.0349601	137.703	31.0725	NA	8.46e-32	ACP5	rs116893436	0.0040461	137.696
ACP5_P13686_OID20314_v1_Cardiometabolic_expo_rt.txt	chr19	11828887	19:11939702:C:T:imp:v1	C	T	0.0227692	0.920295	33896	ADD	0.218876	0.0250344	76.4397	17.6439	NA	2.27e-18	ACP5	rs149680967	0.00225007	76.4357
ACP5_P13686_OID20314_v1_Cardiometabolic_expo_rt.txt	chr19	11834174	19:11944989:T:A:imp:v1	T	A	0.0938474	0.997457	33896	ADD	0.259069	0.0123028	443.426	97.7112	NA	1.94e-98	ACP5	rs74181615	0.0129131	443.402
ACP5_P13686_OID20314_v1_Cardiometabolic_expo_rt.txt	chr19	11846644	19:11957459:G:A:imp:v1	G	A	0.0155177	0.897915	33896	ADD	-0.297922	0.0305803	94.912	21.7011	NA	1.99e-22	ACP5	rs143494653	0.00279228	94.9065
ACP5_P13686_OID20314_v1_Cardiometabolic_expo_rt.txt	chr19	11886795	19:11997610:G:T:imp:v1	G	T	0.488745	0.982265	33896	ADD	0.0448258	0.00723015	38.4381	9.24782	NA	5.65e-10	ACP5	rs11085797	0.00113272	38.4358
ACP5_P13686_OID20314_v1_Cardiometabolic_expo_rt.txt	chr19	12021720	19:12132535:A:T:imp:v1	A	T	0.0122183	0.98111	33896	ADD	-0.247285	0.0329093	56.4624	13.242	NA	5.73e-14	ACP5	rs76151643	0.00166298	56.4589
ACP5_P13686_OID20314_v1_Cardiometabolic_expo_rt.txt	chr19	12069421	19:12180236:T:A:imp:v1	T	A	0.0101619	0.981817	33896	ADD	-0.260831	0.036047	52.3579	12.3349	NA	4.62e-13	ACP5	rs184205313	0.00154227	52.3546
ACP5_P13686_OID20314_v1_Cardiometabolic_expo_rt.txt	chr19	12082272	19:12193087:T:C:imp:v1	T	C	0.14022	0.992208	33896	ADD	-0.069728	0.0103571	45.3249	10.7775	NA	1.67e-11	ACP5	rs8105246	0.00133539	45.3224
ACP5_P13686_OID20314_v1_Cardiometabolic_expo_rt.txt	chr19	12137418	19:12248233:C:T:imp:v1	C	T	0.0309919	1.00731	33896	ADD	0.143366	0.0205932	48.4668	11.4738	NA	3.36e-12	ACP5	rs35893594	0.00142783	48.464
ACP5_P13686_OID20314_v1_Cardiometabolic_expo_rt.txt	chr19	12330430	19:12441244:C:T:imp:v1	C	T	0.169431	0.970353	33896	ADD	-0.133685	0.0096942	190.17	42.5348	NA	2.92e-43	ACP5	rs9676962	0.00557909	190.159
ACP5_P13686_OID20314_v1_Cardiometabolic_expo_rt.txt	chr19	12373771	19:12484585:A:G:imp:v1	A	G	0.0724079	0.950256	33896	ADD	-0.202832	0.0141803	204.596	45.6831	NA	2.07e-46	ACP5	rs17706051	0.00599985	204.586
ACP5_P13686_OID20314_v1_Cardiometabolic_expo_rt.txt	chr19	12447320	19:12558134:C:A:imp:v1	C	A	0.0523577	0.898478	33896	ADD	-0.136215	0.0169712	64.4205	14.9978	NA	1.01e-15	ACP5	rs144236566	0.00189693	64.4168
ACP5_P13686_OID20314_v1_Cardiometabolic_expo_rt.txt	chr19	12482370	19:12593184:G:A:imp:v1	G	A	0.0445923	0.996952	33896	ADD	-0.0968834	0.017383	31.0634	7.60253	NA	2.5e-08	ACP5	rs55831953	0.000915594	31.0616
ACP5_P13686_OID20314_v1_Cardiometabolic_expo_rt.txt	chr19	12483201	19:12594015:C:T:imp:v1	C	T	0.0371145	0.922037	33896	ADD	0.124132	0.0197319	39.5756	9.50086	NA	3.16e-10	ACP5	rs74773471	0.0011662	39.5735
ACP6_Q9NPH0_OID21432_v1_Oncology_expo_rt.txt	chr1	147017739	1:146489298:G:C:imp:v1	G	C	0.0230407	0.735064	33906	ADD	-0.371613	0.0294692	159.018	35.7318	NA	1.85e-36	ACP6	rs146899076	0.00466806	159.008
ACP6_Q9NPH0_OID21432_v1_Oncology_expo_rt.txt	chr1	147023772	1:146495331:G:C:imp:v1	G	C	0.708824	0.844763	33906	ADD	-0.145508	0.00908141	256.725	57.0515	NA	8.88e-58	ACP6	rs1983857	0.00751475	256.709
ACP6_Q9NPH0_OID21432_v1_Oncology_expo_rt.txt	chr1	147025694	1:146497251:C:G:imp:v1	C	G	0.592468	0.831867	33906	ADD	-0.0515739	0.00846007	37.1631	8.96397	NA	1.09e-09	ACP6	rs61806407	0.00109486	37.1609
ACP6_Q9NPH0_OID21432_v1_Oncology_expo_rt.txt	chr1	147026975	1:146498532:C:T:imp:v1	C	T	0.174482	0.723431	33906	ADD	0.0675496	0.0117417	33.0963	8.05698	NA	8.77e-09	ACP6	rs12049533	0.000975177	33.0947
ACP6_Q9NPH0_OID21432_v1_Oncology_expo_rt.txt	chr1	147027243	1:146498800:C:T:imp:v1	C	T	0.0263545	0.810876	33906	ADD	0.239773	0.0262765	83.266	19.1443	NA	7.17e-20	ACP6	rs12022193	0.00244976	83.2607
ACP6_Q9NPH0_OID21432_v1_Oncology_expo_rt.txt	chr1	147027333	1:146498890:A:G:imp:v1	A	G	0.0198193	0.791468	33906	ADD	0.175736	0.0305741	33.0381	8.04397	NA	9.04e-09	ACP6	rs142034752	0.000973452	33.0361
ACP6_Q9NPH0_OID21432_v1_Oncology_expo_rt.txt	chr1	147027524	1:146499081:T:C:imp:v1	T	C	0.0201481	0.832292	33906	ADD	0.237503	0.0295804	64.4661	15.0078	NA	9.82e-16	ACP6	rs143766704	0.0018977	64.4621
ACP6_Q9NPH0_OID21432_v1_Oncology_expo_rt.txt	chr1	147030230	1:146501783:C:A:imp:v1	C	A	0.137398	0.982145	33906	ADD	-0.148426	0.0111149	178.325	39.9488	NA	1.13e-40	ACP6	rs11800992	0.00523184	178.313
ACP6_Q9NPH0_OID21432_v1_Oncology_expo_rt.txt	chr1	147047069	1:146518632:C:G:imp:v1	C	G	0.677416	0.991656	33906	ADD	0.0939853	0.00814109	133.277	30.1044	NA	7.86e-31	ACP6	rs657853	0.00391539	133.269
ACP6_Q9NPH0_OID21432_v1_Oncology_expo_rt.txt	chr1	147061356	1:146532900:C:T:imp:v1	C	T	0.0135338	0.761853	33906	ADD	0.228374	0.0375991	36.8926	8.90372	NA	1.25e-09	ACP6	rs146686380	0.0010869	36.8904
ACP6_Q9NPH0_OID21432_v1_Oncology_expo_rt.txt	chr1	147094678	1:146566245:G:A:imp:v1	G	A	0.151465	0.976498	33906	ADD	0.0873057	0.0107082	66.474	15.4503	NA	3.55e-16	ACP6	rs2354443	0.0019567	66.4701
ACP6_Q9NPH0_OID21432_v1_Oncology_expo_rt.txt	chr1	147111171	1:146582753:A:G:imp:v1	A	G	0.0189903	0.879199	33906	ADD	0.172892	0.0296271	34.0541	8.27084	NA	5.36e-09	ACP6	rs149516892	0.00100336	34.0523
ACP6_Q9NPH0_OID21432_v1_Oncology_expo_rt.txt	chr1	147150618	1:146622197:G:A:imp:v1	G	A	0.033763	0.997167	33906	ADD	-0.265856	0.0210163	160.022	35.9512	NA	1.12e-36	ACP6	rs72706470	0.00469742	160.013
ACP6_Q9NPH0_OID21432_v1_Oncology_expo_rt.txt	chr1	147158594	1:146630173:A:C:imp:v1	A	C	0.0166189	0.95027	33906	ADD	-0.286929	0.0304258	88.9332	20.389	NA	4.08e-21	ACP6	rs145465008	0.00261608	88.9282
ACP6_Q9NPH0_OID21432_v1_Oncology_expo_rt.txt	chr1	147199492	1:146671073:T:C:imp:v1	T	C	0.0217366	0.999972	33906	ADD	-0.275304	0.0260068	112.06	25.4601	NA	3.47e-26	ACP6	rs17355830	0.00329414	112.054
ACP6_Q9NPH0_OID21432_v1_Oncology_expo_rt.txt	chr1	147223009	1:146694601:T:C:imp:v1	T	C	0.0724865	0.967042	33906	ADD	0.188257	0.0148764	160.143	35.9775	NA	1.05e-36	ACP6	rs75435090	0.00470093	160.133
ACP6_Q9NPH0_OID21432_v1_Oncology_expo_rt.txt	chr1	147343487	1:146815237:C:T:imp:v1	C	T	0.325336	0.998275	33906	ADD	-0.13751	0.00809703	288.415	63.9581	NA	1.1e-64	ACP6	rs11239993	0.00843455	288.397
ACP6_Q9NPH0_OID21432_v1_Oncology_expo_rt.txt	chr1	147418207	1:146889931:C:T:imp:v1	C	T	0.014206	0.98871	33906	ADD	0.322544	0.0322264	100.174	22.8551	NA	1.4e-23	ACP6	rs73004009	0.00294575	100.168
ACP6_Q9NPH0_OID21432_v1_Oncology_expo_rt.txt	chr1	147419555	1:146891282:T:C:imp:v1	T	C	0.0106696	0.872581	33906	ADD	-0.348874	0.0395025	77.9986	17.9867	NA	1.03e-18	ACP6	rs144510548	0.00229516	77.9942
ACP6_Q9NPH0_OID21432_v1_Oncology_expo_rt.txt	chr1	147455928	1:146927667:C:T:imp:v1	C	T	0.0137628	0.838149	33906	ADD	-0.478167	0.0355365	181.055	40.5449	NA	2.85e-41	ACP6	rs140176612	0.00531154	181.044
ACP6_Q9NPH0_OID21432_v1_Oncology_expo_rt.txt	chr1	147457511	1:146929250:C:T:imp:v1	C	T	0.016951	0.820722	33906	ADD	0.409252	0.0324168	159.383	35.8115	NA	1.54e-36	ACP6	rs188137959	0.00467873	159.373
ACP6_Q9NPH0_OID21432_v1_Oncology_expo_rt.txt	chr1	147479673	1:146951423:G:A:imp:v1	G	A	0.0215596	1.01711	33906	ADD	0.298403	0.0258889	132.856	30.0122	NA	9.72e-31	ACP6	rs78935396	0.00390305	132.848
ACP6_Q9NPH0_OID21432_v1_Oncology_expo_rt.txt	chr1	147498757	1:146970568:G:A:imp:v1	G	A	0.221664	0.980314	33906	ADD	0.0910382	0.00922219	97.4495	22.2577	NA	5.52e-23	ACP6	rs2000072	0.00286587	97.4437
ACP6_Q9NPH0_OID21432_v1_Oncology_expo_rt.txt	chr1	147503468	1:146975279:A:C:imp:v1	A	C	0.0273222	0.909717	33906	ADD	-0.161	0.0243815	43.6044	10.3959	NA	4.02e-11	ACP6	rs4950453	0.00128439	43.6019
ACP6_Q9NPH0_OID21432_v1_Oncology_expo_rt.txt	chr1	147522334	1:146994158:G:A:imp:v1	G	A	0.113387	0.998851	33906	ADD	-0.188856	0.0119643	249.163	55.4031	NA	3.95e-56	ACP6	rs72698227	0.00729509	249.15
ACP6_Q9NPH0_OID21432_v1_Oncology_expo_rt.txt	chr1	147525421	1:146997245:A:C:imp:v1	A	C	0.28455	0.99039	33906	ADD	0.152578	0.00844536	326.397	72.2324	NA	5.86e-73	ACP6	rs12022413	0.00953477	326.379
ACP6_Q9NPH0_OID21432_v1_Oncology_expo_rt.txt	chr1	147526215	1:146998040:C:A:imp:v1	C	A	0.0110401	0.887	33906	ADD	0.527714	0.0385241	187.642	41.9831	NA	1.04e-42	ACP6	rs140639767	0.00550375	187.632
ACP6_Q9NPH0_OID21432_v1_Oncology_expo_rt.txt	chr1	147532195	1:147004024:G:A:imp:v1	G	A	0.0644762	0.937596	33906	ADD	0.321633	0.0159427	407.001	89.783	NA	1.65e-90	ACP6	rs11578040	0.0118615	406.979
ACP6_Q9NPH0_OID21432_v1_Oncology_expo_rt.txt	chr1	147535546	1:147007367:G:C:imp:v1	G	C	0.022615	0.978276	33906	ADD	0.159366	0.0257746	38.2302	9.20155	NA	6.29e-10	ACP6	rs604080	0.00112627	38.228
ACP6_Q9NPH0_OID21432_v1_Oncology_expo_rt.txt	chr1	147539064	1:147010885:T:A:imp:v1	T	A	0.396641	0.95554	33906	ADD	0.307023	0.00792855	1499.52	327.303	NA	0	ACP6	rs4950459	0.0423529	1499.44
ACP6_Q9NPH0_OID21432_v1_Oncology_expo_rt.txt	chr1	147539626	1:147011447:T:C:imp:v1	T	C	0.034102	0.971042	33906	ADD	0.177948	0.0212032	70.4346	16.3226	NA	4.76e-17	ACP6	rs55776425	0.00207303	70.43
ACP6_Q9NPH0_OID21432_v1_Oncology_expo_rt.txt	chr1	147540001	1:147011822:G:C:imp:v1	G	C	0.0246758	0.989299	33906	ADD	-1.38002	0.0245742	3153.66	686.656	NA	0	ACP6	rs79565532	0.0850963	3153.45
ACP6_Q9NPH0_OID21432_v1_Oncology_expo_rt.txt	chr1	147555803	1:147027578:A:G:imp:v1	A	G	0.0125145	0.891242	33906	ADD	-1.41888	0.0361169	1543.38	336.832	NA	0	ACP6	rs143333817	0.0435373	1543.28
ACP6_Q9NPH0_OID21432_v1_Oncology_expo_rt.txt	chr1	147570052	1:147041838:A:T:imp:v1	A	T	0.0153513	0.998068	33906	ADD	0.308476	0.0308642	99.8925	22.7934	NA	1.61e-23	ACP6	rs115838075	0.0029375	99.8866
ACP6_Q9NPH0_OID21432_v1_Oncology_expo_rt.txt	chr1	147572872	1:147044663:A:G:imp:v1	A	G	0.0139136	0.919097	33906	ADD	-0.308306	0.0337628	83.3853	19.1705	NA	6.75e-20	ACP6	rs139117396	0.00245326	83.3799
ACP6_Q9NPH0_OID21432_v1_Oncology_expo_rt.txt	chr1	147576459	1:147048251:G:A:imp:v1	G	A	0.0152418	0.961882	33906	ADD	0.481177	0.0315488	232.619	51.7958	NA	1.6e-52	ACP6	rs114676148	0.00681394	232.605
ACP6_Q9NPH0_OID21432_v1_Oncology_expo_rt.txt	chr1	147588091	1:147059890:G:A:imp:v1	G	A	0.0191871	0.99563	33906	ADD	-0.177848	0.0276976	41.2301	9.86863	NA	1.35e-10	ACP6	rs112597440	0.00121453	41.2276
ACP6_Q9NPH0_OID21432_v1_Oncology_expo_rt.txt	chr1	147589979	1:147061778:T:C:imp:v1	T	C	0.0130219	0.94673	33906	ADD	-0.505935	0.0343878	216.461	48.2716	NA	5.35e-49	ACP6	rs150011608	0.00634367	216.449
ACP6_Q9NPH0_OID21432_v1_Oncology_expo_rt.txt	chr1	147592199	1:147063988:T:C:imp:v1	T	C	0.0190848	0.935256	33906	ADD	0.15684	0.0286579	29.9521	7.35374	NA	4.43e-08	ACP6	rs80219350	0.000882602	29.9502
ACP6_Q9NPH0_OID21432_v1_Oncology_expo_rt.txt	chr1	147598934	1:147070727:C:T:imp:v1	C	T	0.0160886	1.00228	33906	ADD	0.311396	0.0301187	106.893	24.3281	NA	4.7e-25	ACP6	rs113085271	0.00314275	106.888
ACP6_Q9NPH0_OID21432_v1_Oncology_expo_rt.txt	chr1	147600639	1:147072431:G:A:imp:v1	G	A	0.0140022	0.974792	33906	ADD	0.497388	0.0326957	231.425	51.5354	NA	2.91e-52	ACP6	rs12059427	0.0067792	231.411
ACP6_Q9NPH0_OID21432_v1_Oncology_expo_rt.txt	chr1	147603020	1:147074812:C:T:imp:v1	C	T	0.0347819	0.962878	33906	ADD	0.378253	0.0210918	321.617	71.1913	NA	6.44e-72	ACP6	rs77985307	0.00939639	321.597
ACP6_Q9NPH0_OID21432_v1_Oncology_expo_rt.txt	chr1	147604923	1:147076716:C:T:imp:v1	C	T	0.0601074	0.942754	33906	ADD	-0.630033	0.0164314	1470.21	320.934	NA	0	ACP6	rs116523799	0.0415591	1470.12
ACP6_Q9NPH0_OID21432_v1_Oncology_expo_rt.txt	chr1	147605992	1:147077785:T:C:imp:v1	T	C	0.0153218	0.998124	33906	ADD	0.243957	0.0309091	62.295	14.5292	NA	2.96e-15	ACP6	rs71620823	0.00183392	62.2914
ACP6_Q9NPH0_OID21432_v1_Oncology_expo_rt.txt	chr1	147608966	1:147080763:C:T:imp:v1	C	T	0.0293606	1.00804	33906	ADD	0.362372	0.0223669	262.482	58.3064	NA	4.94e-59	ACP6	rs76093248	0.00768196	262.465
ACP6_Q9NPH0_OID21432_v1_Oncology_expo_rt.txt	chr1	147609390	1:147081187:G:A:imp:v1	G	A	0.316717	0.981075	33906	ADD	-0.833813	0.00823153	10260.7	2230.18	NA	0	ACP6	rs613089	0.232317	10260.1
ACP6_Q9NPH0_OID21432_v1_Oncology_expo_rt.txt	chr1	147615167	1:147086967:G:A:imp:v1	G	A	0.140018	0.991342	33906	ADD	0.316441	0.0109741	831.48	182.112	NA	7.73e-183	ACP6	rs6675828	0.0239359	831.423
ACP6_Q9NPH0_OID21432_v1_Oncology_expo_rt.txt	chr1	147620306	1:147092112:G:A:imp:v1	G	A	0.0384238	0.96623	33906	ADD	-0.643167	0.0200697	1026.99	224.612	NA	2.44e-225	ACP6	rs61754125	0.0293988	1026.93
ACP6_Q9NPH0_OID21432_v1_Oncology_expo_rt.txt	chr1	147628933	1:147100734:C:T:imp:v1	C	T	0.0153747	0.979214	33906	ADD	0.236767	0.0311317	57.8414	13.5465	NA	2.84e-14	ACP6	rs80335568	0.00170302	57.8377
ACP6_Q9NPH0_OID21432_v1_Oncology_expo_rt.txt	chr1	147635450	1:147107250:C:T:imp:v1	C	T	0.0470271	0.996061	33906	ADD	0.393165	0.017949	479.809	105.629	NA	2.35e-106	ACP6	rs78712378	0.0139537	479.782
ACP6_Q9NPH0_OID21432_v1_Oncology_expo_rt.txt	chr1	147637785	1:147109584:G:C:imp:v1	G	C	0.0574931	0.992067	33906	ADD	0.361473	0.0163487	488.861	107.598	NA	2.52e-108	ACP6	rs55690224	0.0142132	488.832
ACP6_Q9NPH0_OID21432_v1_Oncology_expo_rt.txt	chr1	147640785	1:147112584:G:A:imp:v1	G	A	0.026265	0.853426	33906	ADD	0.443699	0.0256577	299.048	66.2748	NA	5.31e-67	ACP6	rs148127209	0.00874281	299.031
ACP6_Q9NPH0_OID21432_v1_Oncology_expo_rt.txt	chr1	147645738	1:147117540:T:C:imp:v1	T	C	0.0262048	0.998517	33906	ADD	0.319868	0.0237549	181.315	40.6018	NA	2.5e-41	ACP6	rs59438946	0.00531915	181.305
ACP6_Q9NPH0_OID21432_v1_Oncology_expo_rt.txt	chr1	147658988	1:147131103:C:T:imp:v1	C	T	0.0559752	0.977849	33906	ADD	-0.732049	0.0166764	1926.98	420.179	NA	0	ACP6	rs11800736	0.0537765	1926.86
ACP6_Q9NPH0_OID21432_v1_Oncology_expo_rt.txt	chr1	147672895	1:147145020:C:T:imp:v1	C	T	0.0236943	0.952491	33906	ADD	-0.690639	0.0255442	731	160.265	NA	5.43e-161	ACP6	rs150066520	0.0211046	730.957
ACP6_Q9NPH0_OID21432_v1_Oncology_expo_rt.txt	chr1	147673083	1:147145208:C:T:imp:v1	C	T	0.0161265	0.881911	33906	ADD	0.281428	0.0320457	77.1251	17.7946	NA	1.6e-18	ACP6	rs145393543	0.00226951	77.1204
ACP6_Q9NPH0_OID21432_v1_Oncology_expo_rt.txt	chr1	147676188	1:147148304:T:C:imp:v1	T	C	0.040619	0.920947	33906	ADD	0.5636	0.020017	792.767	173.695	NA	2.02e-174	ACP6	rs10494246	0.022847	792.717
ACP6_Q9NPH0_OID21432_v1_Oncology_expo_rt.txt	chr1	147687647	1:147159772:G:A:imp:v1	G	A	0.0300806	0.960855	33906	ADD	-0.647631	0.0226407	818.232	179.232	NA	5.86e-180	ACP6	rs80139330	0.0235637	818.182
ACP6_Q9NPH0_OID21432_v1_Oncology_expo_rt.txt	chr1	147691507	1:147163628:A:T:imp:v1	A	T	0.0180717	0.928495	33906	ADD	0.424155	0.0295339	206.257	46.0455	NA	9.01e-47	ACP6	rs60322015	0.0060464	206.244
ACP6_Q9NPH0_OID21432_v1_Oncology_expo_rt.txt	chr1	147693117	1:147165238:T:C:imp:v1	T	C	0.221856	0.981291	33906	ADD	0.401315	0.0092104	1898.51	413.993	NA	0	ACP6	rs11586154	0.0530244	1898.4
ACP6_Q9NPH0_OID21432_v1_Oncology_expo_rt.txt	chr1	147697082	1:147169202:G:T:imp:v1	G	T	0.0984316	0.939557	33906	ADD	0.239202	0.0131309	331.847	73.4194	NA	3.81e-74	ACP6	rs79372002	0.00969246	331.83
ACP6_Q9NPH0_OID21432_v1_Oncology_expo_rt.txt	chr1	147711455	1:147183588:G:A:imp:v1	G	A	0.208697	0.992747	33906	ADD	-0.136021	0.00936548	210.938	47.0668	NA	8.57e-48	ACP6	rs6679968	0.00618275	210.924
ACP6_Q9NPH0_OID21432_v1_Oncology_expo_rt.txt	chr1	147716928	1:147189062:T:C:imp:v1	T	C	0.0138228	0.928349	33906	ADD	-0.18393	0.0336986	29.7906	7.31757	NA	4.81e-08	ACP6	rs138976874	0.000877856	29.789
ACP6_Q9NPH0_OID21432_v1_Oncology_expo_rt.txt	chr1	147739413	1:147211541:C:G:imp:v1	C	G	0.0178582	0.99527	33906	ADD	0.234742	0.028693	66.9313	15.5511	NA	2.81e-16	ACP6	rs116116308	0.00197014	66.9274
ACP6_Q9NPH0_OID21432_v1_Oncology_expo_rt.txt	chr1	147741324	1:147213452:G:A:imp:v1	G	A	0.0154328	0.897513	33906	ADD	-0.349372	0.0324766	115.727	26.2632	NA	5.46e-27	ACP6	rs141731346	0.00340157	115.72
ACP6_Q9NPH0_OID21432_v1_Oncology_expo_rt.txt	chr1	147761394	1:147233502:G:C:imp:v1	G	C	0.0121301	0.80184	33906	ADD	-0.605023	0.038682	244.639	54.4167	NA	3.83e-55	ACP6	rs79096114	0.00716353	244.625
ACP6_Q9NPH0_OID21432_v1_Oncology_expo_rt.txt	chr1	147764176	1:147236285:T:C:imp:v1	T	C	0.997133	0.954458	33906	ADD	-0.404869	0.0725742	31.1218	7.61559	NA	2.42e-08	ACP6	rs2047279	0.000917043	31.12
ACP6_Q9NPH0_OID21432_v1_Oncology_expo_rt.txt	chr1	147776970	1:147249081:A:G:imp:v1	A	G	0.813045	0.988046	33906	ADD	0.231852	0.00978346	561.612	123.426	NA	3.75e-124	ACP6	rs1342703	0.0162939	561.579
ACP6_Q9NPH0_OID21432_v1_Oncology_expo_rt.txt	chr1	147785516	1:147257627:C:T:imp:v1	C	T	0.0137063	0.981218	33906	ADD	0.232445	0.0329187	49.8601	11.7822	NA	1.65e-12	ACP6	rs116082858	0.00146839	49.8574
ACP6_Q9NPH0_OID21432_v1_Oncology_expo_rt.txt	chr1	147810302	1:147282416:T:C:imp:v1	T	C	0.0727741	1.00695	33906	ADD	0.290721	0.0145457	399.47	88.1436	NA	7.18e-89	ACP6	rs80079599	0.0116445	399.446
ACP6_Q9NPH0_OID21432_v1_Oncology_expo_rt.txt	chr1	147819813	1:147291928:A:G:imp:v1	A	G	0.156213	0.981761	33906	ADD	-0.192267	0.0105356	333.037	73.6787	NA	2.1e-74	ACP6	rs78250280	0.00972679	333.016
ACP6_Q9NPH0_OID21432_v1_Oncology_expo_rt.txt	chr1	147825354	1:147297488:C:G:imp:v1	C	G	0.0402522	0.944195	33906	ADD	0.208675	0.0198513	110.5	25.1183	NA	7.62e-26	ACP6	rs78757075	0.00324843	110.494
ACP6_Q9NPH0_OID21432_v1_Oncology_expo_rt.txt	chr1	147836923	1:147309058:G:T:imp:v1	G	T	0.0118858	0.998016	33906	ADD	0.35359	0.0350153	101.973	23.2496	NA	5.63e-24	ACP6	rs75709197	0.0029985	101.967
ACP6_Q9NPH0_OID21432_v1_Oncology_expo_rt.txt	chr1	147841836	1:147313970:T:G:imp:v1	T	G	0.0115497	0.97341	33906	ADD	-0.527759	0.0359459	215.562	48.0756	NA	8.4e-49	ACP6	rs61740912	0.00631748	215.549
ACP6_Q9NPH0_OID21432_v1_Oncology_expo_rt.txt	chr1	147842136	1:147314270:T:C:imp:v1	T	C	0.0279597	0.996196	33906	ADD	0.140229	0.0230434	37.0325	8.93488	NA	1.16e-09	ACP6	rs116740746	0.00109102	37.0303
ACP6_Q9NPH0_OID21432_v1_Oncology_expo_rt.txt	chr1	147847154	1:147319290:G:C:imp:v1	G	C	0.0223793	0.964198	33906	ADD	0.357547	0.0261026	187.629	41.98	NA	1.05e-42	ACP6	rs74708425	0.00550333	187.617
ACP6_Q9NPH0_OID21432_v1_Oncology_expo_rt.txt	chr1	147859200	1:147331332:A:G:imp:v1	A	G	0.0185237	0.930578	33906	ADD	0.331402	0.0291571	129.188	29.2098	NA	6.17e-30	ACP6	rs143737455	0.00379571	129.18
ACP6_Q9NPH0_OID21432_v1_Oncology_expo_rt.txt	chr1	147860465	1:147332597:A:T:imp:v1	A	T	0.0276645	0.963168	33906	ADD	-0.263595	0.0235622	125.154	28.3271	NA	4.71e-29	ACP6	rs144645991	0.00367761	125.146
ACP6_Q9NPH0_OID21432_v1_Oncology_expo_rt.txt	chr1	147862100	1:147334232:G:A:imp:v1	G	A	0.0212504	1.0071	33906	ADD	-0.854481	0.0261951	1064.06	232.669	NA	2.14e-233	ACP6	rs149184726	0.0304276	1063.99
ACP6_Q9NPH0_OID21432_v1_Oncology_expo_rt.txt	chr1	147873023	1:147345155:T:C:imp:v1	T	C	0.0315642	0.977643	33906	ADD	0.302996	0.0219287	190.918	42.6981	NA	2e-43	ACP6	rs61810420	0.00559929	190.907
ACP6_Q9NPH0_OID21432_v1_Oncology_expo_rt.txt	chr1	147875575	1:147347706:T:G:imp:v1	T	G	0.642704	0.968941	33906	ADD	-0.140301	0.00804206	304.361	67.4323	NA	3.7e-68	ACP6	rs6674608	0.00889671	304.342
ACP6_Q9NPH0_OID21432_v1_Oncology_expo_rt.txt	chr1	147876395	1:147348526:T:G:imp:v1	T	G	0.0284279	0.935502	33906	ADD	0.301208	0.023586	163.09	36.6213	NA	2.39e-37	ACP6	rs75929937	0.00478701	163.079
ACP6_Q9NPH0_OID21432_v1_Oncology_expo_rt.txt	chr1	147881905	1:147354030:C:T:imp:v1	C	T	0.775292	0.999016	33906	ADD	-0.0521788	0.00909115	32.942	8.02251	NA	9.49e-09	ACP6	rs11240144	0.000970627	32.9401
ACP6_Q9NPH0_OID21432_v1_Oncology_expo_rt.txt	chr1	147906537	1:147378664:A:G:imp:v1	A	G	0.376124	0.95425	33906	ADD	0.20522	0.00801065	656.3	144.021	NA	9.53e-145	ACP6	rs6674829	0.018989	656.263
ACP6_Q9NPH0_OID21432_v1_Oncology_expo_rt.txt	chr1	147909317	1:147381444:A:C:imp:v1	A	C	0.768905	0.787744	33906	ADD	-0.11878	0.0101355	137.338	30.9926	NA	1.02e-31	ACP6	rs1532399	0.00403426	137.332
ACP6_Q9NPH0_OID21432_v1_Oncology_expo_rt.txt	chr1	147911622	1:147383749:T:C:imp:v1	T	C	0.0280481	1.00252	33906	ADD	-0.14808	0.0229329	41.6941	9.97172	NA	1.07e-10	ACP6	rs75150339	0.00122819	41.6917
ACP6_Q9NPH0_OID21432_v1_Oncology_expo_rt.txt	chr1	148261431	1:147733706:T:A:imp:v1	T	A	0.0398438	0.716666	33906	ADD	-0.396594	0.0228979	299.985	66.479	NA	3.32e-67	ACP6	rs111908862	0.00876998	299.968
ACP6_Q9NPH0_OID21432_v1_Oncology_expo_rt.txt	chr1	148290114	1:147762220:G:A:imp:v1	G	A	0.0578659	1.00025	33906	ADD	0.165057	0.0162307	103.417	23.5661	NA	2.72e-24	ACP6	rs116459505	0.00304084	103.411
ACP6_Q9NPH0_OID21432_v1_Oncology_expo_rt.txt	chr1	148320690	1:147792807:A:C:imp:v1	A	C	0.0359165	0.887919	33906	ADD	-0.349796	0.0216261	261.621	58.1188	NA	7.61e-59	ACP6	rs138590699	0.007657	261.606
ACP6_Q9NPH0_OID21432_v1_Oncology_expo_rt.txt	chr1	148321295	1:147793394:G:A:imp:v1	G	A	0.0935251	0.792512	33906	ADD	-0.143137	0.0146245	95.7947	21.8947	NA	1.27e-22	ACP6	rs116331844	0.00281734	95.7891
ACP6_Q9NPH0_OID21432_v1_Oncology_expo_rt.txt	chr1	148325129	1:147797218:C:T:imp:v1	C	T	0.314157	0.862269	33906	ADD	0.0490895	0.00879736	31.1367	7.61893	NA	2.4e-08	ACP6	rs11811663	0.000917481	31.1349
ACP6_Q9NPH0_OID21432_v1_Oncology_expo_rt.txt	chr1	148332363	1:147804488:G:A:imp:v1	G	A	0.0190527	0.997936	33906	ADD	0.21761	0.0277558	61.4679	14.3468	NA	4.5e-15	ACP6	rs115707791	0.00180962	61.4645
ACP6_Q9NPH0_OID21432_v1_Oncology_expo_rt.txt	chr1	148350084	1:147822212:T:C:imp:v1	T	C	0.238892	0.99038	33906	ADD	0.129984	0.00893442	211.665	47.2255	NA	5.95e-48	ACP6	rs526708	0.00620394	211.652
ACP6_Q9NPH0_OID21432_v1_Oncology_expo_rt.txt	chr1	148353420	1:147825548:T:C:imp:v1	T	C	0.954772	1.00112	33906	ADD	-0.173466	0.0182394	90.4502	20.7219	NA	1.9e-21	ACP6	rs515565	0.00266057	90.4445
ACP6_Q9NPH0_OID21432_v1_Oncology_expo_rt.txt	chr1	148353641	1:147825769:G:A:imp:v1	G	A	0.0514001	0.875671	33906	ADD	0.25797	0.0183466	197.71	44.1803	NA	6.6e-45	ACP6	rs72704337	0.0057973	197.698
ACRBP_Q8NEB7_OID31385_v1_Oncology_II_expo_rt.txt	chr12	6421895	12:6531061:A:T:imp:v1	A	T	0.606626	0.993811	33777	ADD	0.0462455	0.00773651	35.7314	8.64496	NA	2.26e-09	ACRBP	rs11064184	0.00105674	35.7292
ACRBP_Q8NEB7_OID31385_v1_Oncology_II_expo_rt.txt	chr12	6453657	12:6562823:C:T:imp:v1	C	T	0.294653	1.0022	33777	ADD	0.0893309	0.00825355	117.145	26.5737	NA	2.67e-27	ACRBP	rs2041387	0.00345619	117.138
ACRBP_Q8NEB7_OID31385_v1_Oncology_II_expo_rt.txt	chr12	6538287	12:6647453:G:T:imp:v1	G	T	0.213923	0.998607	33777	ADD	-0.0667429	0.00919163	52.7261	12.4163	NA	3.83e-13	ACRBP	rs1803622	0.00155857	52.7229
ACRBP_Q8NEB7_OID31385_v1_Oncology_II_expo_rt.txt	chr12	6561179	12:6670345:A:G:imp:v1	A	G	0.013894	0.918899	33777	ADD	0.195455	0.0335757	33.8879	8.23372	NA	5.84e-09	ACRBP	rs71579323	0.00100227	33.8858
ACRBP_Q8NEB7_OID31385_v1_Oncology_II_expo_rt.txt	chr12	6590005	12:6699171:C:G:imp:v1	C	G	0.161002	0.986423	33777	ADD	-0.0737503	0.0103209	51.0613	12.048	NA	8.95e-13	ACRBP	rs71445120	0.00150944	51.0583
ACRBP_Q8NEB7_OID31385_v1_Oncology_II_expo_rt.txt	chr12	6638412	12:6747578:G:C:imp:v1	G	C	0.798582	0.994804	33777	ADD	-0.147332	0.00941385	244.94	54.4823	NA	3.29e-55	ACRBP	rs1882553	0.00719947	244.925
ACRBP_Q8NEB7_OID31385_v1_Oncology_II_expo_rt.txt	chr12	6645025	12:6754191:A:G:imp:v1	A	G	0.361059	1.00356	33777	ADD	0.160696	0.00782974	421.228	92.8799	NA	1.32e-93	ACRBP	rs7959658	0.0123172	421.201
ACRBP_Q8NEB7_OID31385_v1_Oncology_II_expo_rt.txt	chr12	6712110	12:6821276:G:A:imp:v1	G	A	0.196119	0.950001	33777	ADD	-0.0630603	0.00973819	41.9331	10.0248	NA	9.44e-11	ACRBP	rs111657221	0.00123993	41.9305
ACRBP_Q8NEB7_OID31385_v1_Oncology_II_expo_rt.txt	chr12	6716427	12:6825593:A:G:imp:v1	A	G	0.619493	0.859396	33777	ADD	-0.0770656	0.00837061	84.763	19.4732	NA	3.36e-20	ACRBP	rs10774441	0.00250321	84.7581
ACRBP_Q8NEB7_OID31385_v1_Oncology_II_expo_rt.txt	chr12	6721642	12:6830808:G:C:imp:v1	G	C	0.296208	0.925708	33777	ADD	-0.0572587	0.00858204	44.5145	10.5978	NA	2.52e-11	ACRBP	rs11614527	0.00131616	44.5119
ACRBP_Q8NEB7_OID31385_v1_Oncology_II_expo_rt.txt	chr12	6748732	12:6857898:C:A:imp:v1	C	A	0.23488	0.995741	33777	ADD	-0.0505537	0.00890615	32.2201	7.86119	NA	1.38e-08	ACRBP	rs35247189	0.000952995	32.2181
ACRBP_Q8NEB7_OID31385_v1_Oncology_II_expo_rt.txt	chr12	6788073	12:6897239:A:G:imp:v1	A	G	0.0751083	0.975186	33777	ADD	0.094852	0.0144793	42.9141	10.2426	NA	5.72e-11	ACRBP	rs7967888	0.00126889	42.9113
ACRV1_P26436_OID30513_v1_Inflammation_II_expo_rt.txt	chr11	125605137	11:125475032:G:GA:imp:v1	G	GA	0.302541	0.947989	32981	ADD	-0.0373307	0.00547659	46.4635	11.0299	NA	9.33e-12	ACRV1	rs199735933	0.00140681	46.4607
ACRV1_P26436_OID30513_v1_Inflammation_II_expo_rt.txt	chr11	125831449	11:125701344:C:T:imp:v1	C	T	0.189053	0.991167	32981	ADD	0.0657608	0.00628231	109.571	24.9148	NA	1.22e-25	ACRV1	rs77322490	0.00331124	109.564
ACTA2_P62736_OID20079_v1_Cardiometabolic_expo_rt.txt	chr10	88991759	10:90751516:C:T:imp:v1	C	T	0.498774	1.00226	33043	ADD	-0.0602131	0.00682485	77.8387	17.9515	NA	1.12e-18	ACTA2	rs1324551	0.00235014	77.834
ACTA2_P62736_OID20079_v1_Cardiometabolic_expo_rt.txt	chr10	88997488	10:90757245:G:A:imp:v1	G	A	0.0656814	0.987299	33043	ADD	-0.0772663	0.0138955	30.9195	7.57033	NA	2.69e-08	ACTA2	rs9658702	0.000934859	30.9176
ACTA2_P62736_OID20079_v1_Cardiometabolic_expo_rt.txt	chr10	89002108	10:90761865:T:C:imp:v1	T	C	0.148381	1.0041	33043	ADD	0.0585612	0.00959494	37.2508	8.98349	NA	1.04e-09	ACTA2	rs9658727	0.00112607	37.2485
ACVRL1_P37023_OID20999_v1_Neurology_expo_rt.txt	chr12	51400902	12:51794686:G:A:imp:v1	G	A	0.121411	0.978716	33372	ADD	-0.0633585	0.011159	32.2376	7.86511	NA	1.36e-08	ACVRL1	rs117275373	0.000965067	32.2354
ACVRL1_P37023_OID20999_v1_Neurology_expo_rt.txt	chr12	51609393	12:52003177:C:T:imp:v1	C	T	0.0579163	0.923129	33372	ADD	0.150469	0.0160672	87.7035	20.119	NA	7.6e-21	ACVRL1	rs117723520	0.00262115	87.6976
ACVRL1_P37023_OID20999_v1_Neurology_expo_rt.txt	chr12	51612825	12:52006609:G:A:imp:v1	G	A	0.0118886	0.969521	33372	ADD	0.211951	0.0337862	39.3544	9.45168	NA	3.53e-10	ACVRL1	rs141899184	0.00117787	39.3519
ACVRL1_P37023_OID20999_v1_Neurology_expo_rt.txt	chr12	51860373	12:52254157:T:C:imp:v1	T	C	0.0803246	0.936571	33372	ADD	0.0753817	0.0137078	30.2409	7.41841	NA	3.82e-08	ACVRL1	rs73109570	0.000905359	30.2392
ACVRL1_P37023_OID20999_v1_Neurology_expo_rt.txt	chr12	51872664	12:52266448:G:A:imp:v1	G	A	0.0455621	0.99912	33372	ADD	-0.0947342	0.0172944	30.0057	7.36574	NA	4.31e-08	ACVRL1	rs116976611	0.000898318	30.0038
ACVRL1_P37023_OID20999_v1_Neurology_expo_rt.txt	chr12	51887289	12:52281073:G:A:imp:v1	G	A	0.480937	0.977638	33372	ADD	0.116639	0.00729987	255.306	56.7422	NA	1.81e-57	ACVRL1	rs7135025	0.00759216	255.289
ACVRL1_P37023_OID20999_v1_Neurology_expo_rt.txt	chr12	51891659	12:52285443:A:C:imp:v1	A	C	0.0673233	0.977524	33372	ADD	0.561081	0.0145497	1487.11	324.606	NA	0	ACVRL1	rs74492597	0.0426606	1487.02
ACVRL1_P37023_OID20999_v1_Neurology_expo_rt.txt	chr12	51897570	12:52291354:T:C:imp:v1	T	C	0.485611	0.994503	33372	ADD	0.199426	0.00723264	760.274	166.63	NA	2.34e-167	ACVRL1	rs4761835	0.0222743	760.228
ACVRL1_P37023_OID20999_v1_Neurology_expo_rt.txt	chr12	51905754	12:52299538:A:C:imp:v1	A	C	0.0276636	0.95662	33372	ADD	-0.187494	0.022468	69.638	16.1472	NA	7.13e-17	ACVRL1	rs73111518	0.00208237	69.6338
ACVRL1_P37023_OID20999_v1_Neurology_expo_rt.txt	chr12	51914890	12:52308674:T:A:imp:v1	T	A	0.087837	0.990765	33372	ADD	0.164848	0.0127939	166.021	37.2617	NA	5.47e-38	ACVRL1	rs150466281	0.00495021	166.01
ACVRL1_P37023_OID20999_v1_Neurology_expo_rt.txt	chr12	51920604	12:52314388:T:G:imp:v1	T	G	0.112604	0.999605	33372	ADD	-0.240388	0.0114068	444.119	97.8619	NA	1.37e-98	ACVRL1	rs2277383	0.0131333	444.091
ACVRL1_P37023_OID20999_v1_Neurology_expo_rt.txt	chr12	51931375	12:52325159:T:TAC:imp:v1	T	TAC	0.326092	0.888074	33372	ADD	-0.047641	0.00815942	34.0913	8.27914	NA	5.26e-09	ACVRL1	rs7977285	0.00102051	34.0892
ACVRL1_P37023_OID20999_v1_Neurology_expo_rt.txt	chr12	51944229	12:52338013:A:G:imp:v1	A	G	0.0125278	0.973845	33372	ADD	0.438773	0.0328491	178.415	39.9685	NA	1.08e-40	ACVRL1	rs77122453	0.00531784	178.405
ACVRL1_P37023_OID20999_v1_Neurology_expo_rt.txt	chr12	51957071	12:52350855:C:T:imp:v1	C	T	0.968333	0.969503	33372	ADD	0.139261	0.0209192	44.3168	10.5539	NA	2.79e-11	ACVRL1	rs2684333	0.0013262	44.3142
ACVRL1_P37023_OID20999_v1_Neurology_expo_rt.txt	chr12	51964218	12:52358002:G:A:imp:v1	G	A	0.127567	0.987043	33372	ADD	-0.132114	0.0108779	147.507	33.2161	NA	6.08e-34	ACVRL1	rs12423014	0.00440058	147.496
ACVRL1_P37023_OID20999_v1_Neurology_expo_rt.txt	chr12	52010783	12:52404567:G:T:imp:v1	G	T	0.0162012	0.953141	33372	ADD	-0.223576	0.0292551	58.4046	13.6708	NA	2.13e-14	ACVRL1	rs147950249	0.00174705	58.4011
ACVRL1_P37023_OID20999_v1_Neurology_expo_rt.txt	chr12	52025798	12:52419582:C:G:imp:v1	C	G	0.480227	1.00155	33372	ADD	0.10761	0.00720962	222.783	49.6506	NA	2.24e-50	ACVRL1	rs1283177	0.00663145	222.769
ACVRL1_P37023_OID20999_v1_Neurology_expo_rt.txt	chr12	52029395	12:52423179:G:A:imp:v1	G	A	0.316538	1.00987	33372	ADD	-0.0493992	0.0077147	41.0018	9.81789	NA	1.52e-10	ACVRL1	rs1283170	0.00122712	40.9992
ACVRL1_P37023_OID20999_v1_Neurology_expo_rt.txt	chr12	52041848	12:52435632:A:C:imp:v1	A	C	0.0400527	0.916054	33372	ADD	-0.113081	0.0192074	34.6613	8.40633	NA	3.92e-09	ACVRL1	rs138157115	0.00103755	34.659
ACVRL1_P37023_OID20999_v1_Neurology_expo_rt.txt	chr12	52049658	12:52443442:G:A:imp:v1	G	A	0.607537	0.937411	33372	ADD	-0.0608559	0.00762809	63.6464	14.8272	NA	1.49e-15	ACVRL1	rs1283154	0.00190355	63.6426
ACVRL1_P37023_OID20999_v1_Neurology_expo_rt.txt	chr12	52101815	12:52495599:T:C:imp:v1	T	C	0.243062	0.917996	33372	ADD	0.114011	0.00878229	168.531	37.8099	NA	1.55e-38	ACVRL1	rs7310854	0.00502468	168.52
ACVRL1_P37023_OID20999_v1_Neurology_expo_rt.txt	chr12	52115684	12:52509468:G:A:imp:v1	G	A	0.125565	0.978519	33372	ADD	-0.10556	0.0109986	92.1133	21.087	NA	8.18e-22	ACVRL1	rs56285889	0.00275261	92.1081
ACVRL1_P37023_OID20999_v1_Neurology_expo_rt.txt	chr12	52128294	12:52522078:C:T:imp:v1	C	T	0.52442	0.938179	33372	ADD	-0.0554713	0.00745054	55.4322	13.0144	NA	9.67e-14	ACVRL1	rs7311371	0.00165828	55.4288
ACVRL1_P37023_OID20999_v1_Neurology_expo_rt.txt	chr12	52156982	12:52550766:G:C:imp:v1	G	C	0.145463	0.986822	33372	ADD	0.0929006	0.0102949	81.4316	18.7413	NA	1.81e-19	ACVRL1	rs12304912	0.00243418	81.4267
ACVRL1_P37023_OID20999_v1_Neurology_expo_rt.txt	chr12	52167848	12:52561632:A:C:imp:v1	A	C	0.510853	0.985107	33372	ADD	-0.0413168	0.00726394	32.3527	7.89083	NA	1.29e-08	ACVRL1	rs11170029	0.000968514	32.3506
ACY1_Q03154_OID20137_v1_Cardiometabolic_expo_rt.txt	chr3	51204933	3:51242364:G:A:imp:v1	G	A	0.0833743	0.872059	33693	ADD	-0.0909879	0.013755	43.7571	10.4297	NA	3.72e-11	ACY1	rs185199659	0.00129701	43.7543
ACY1_Q03154_OID20137_v1_Cardiometabolic_expo_rt.txt	chr3	51324271	3:51361702:T:C:imp:v1	T	C	0.0152716	0.782658	33693	ADD	-0.336196	0.0327321	105.496	24.0219	NA	9.51e-25	ACY1	rs201856101	0.00312133	105.49
ACY1_Q03154_OID20137_v1_Cardiometabolic_expo_rt.txt	chr3	51731491	3:51765507:C:T:imp:v1	C	T	0.114312	0.998332	33693	ADD	-0.0768176	0.0111685	47.3076	11.217	NA	6.07e-12	ACY1	rs58412051	0.00140211	47.3049
ACY1_Q03154_OID20137_v1_Cardiometabolic_expo_rt.txt	chr3	51982820	3:52016836:C:T:imp:v1	C	T	0.0200859	0.914941	33693	ADD	-0.462066	0.0264537	305.094	67.592	NA	2.56e-68	ACY1	rs150416778	0.00897389	305.077
ACY3_Q96HD9_OID30086_v1_Cardiometabolic_II_expo_rt.txt	chr11	66673625	11:66441096:A:G:imp:v1	A	G	0.174431	0.998089	32862	ADD	0.0957821	0.00995516	92.5705	21.1873	NA	6.5e-22	ACY3	rs147899239	0.00280903	92.5648
ACY3_Q96HD9_OID30086_v1_Cardiometabolic_II_expo_rt.txt	chr11	66676235	11:66443706:C:T:imp:v1	C	T	0.01739	0.967514	32862	ADD	-0.1615	0.0293573	30.2631	7.42339	NA	3.77e-08	ACY3	rs148547920	0.000920066	30.2612
ACY3_Q96HD9_OID30086_v1_Cardiometabolic_II_expo_rt.txt	chr11	66794112	11:66561583:TA:T:imp:v1	TA	T	0.0199188	0.769694	32862	ADD	-0.257145	0.0307988	69.7092	16.1629	NA	6.87e-17	ACY3	rs74451748	0.00211677	69.7047
ACY3_Q96HD9_OID30086_v1_Cardiometabolic_II_expo_rt.txt	chr11	66956900	11:66724371:A:C:imp:v1	A	C	0.0996072	0.989784	32862	ADD	-0.0856722	0.012667	45.7441	10.8704	NA	1.35e-11	ACY3	rs6591228	0.00139006	45.741
ACY3_Q96HD9_OID30086_v1_Cardiometabolic_II_expo_rt.txt	chr11	66981526	11:66748997:C:A:imp:v1	C	A	0.0153653	0.882918	32862	ADD	-0.209549	0.0326577	41.1719	9.8557	NA	1.39e-10	ACY3	rs117574517	0.0012513	41.1693
ACY3_Q96HD9_OID30086_v1_Cardiometabolic_II_expo_rt.txt	chr11	67035216	11:66802687:T:C:imp:v1	T	C	0.0752011	0.988121	32862	ADD	0.0924707	0.0143993	41.2404	9.87091	NA	1.35e-10	ACY3	rs145183935	0.00125339	41.2381
ACY3_Q96HD9_OID30086_v1_Cardiometabolic_II_expo_rt.txt	chr11	67047413	11:66814884:A:G:imp:v1	A	G	0.852309	0.977283	32862	ADD	0.102889	0.0107706	91.2548	20.8985	NA	1.26e-21	ACY3	rs10896149	0.00276924	91.2497
ACY3_Q96HD9_OID30086_v1_Cardiometabolic_II_expo_rt.txt	chr11	67067901	11:66835372:A:G:imp:v1	A	G	0.499722	0.994727	32862	ADD	-0.0665503	0.00757123	77.2622	17.8248	NA	1.5e-18	ACY3	rs7129017	0.0023456	77.2575
ACY3_Q96HD9_OID30086_v1_Cardiometabolic_II_expo_rt.txt	chr11	67208243	11:66975714:A:T:imp:v1	A	T	0.0249686	0.954601	32862	ADD	0.168831	0.0247571	46.5055	11.0392	NA	9.14e-12	ACY3	rs186140302	0.00141318	46.5027
ACY3_Q96HD9_OID30086_v1_Cardiometabolic_II_expo_rt.txt	chr11	67223388	11:66990859:CTTATTTAT:C:imp:v1	CTTATTTAT	C	0.053141	0.967602	32862	ADD	0.190589	0.0171081	124.106	28.0977	NA	7.99e-29	ACY3	rs200586109	0.00376237	124.098
ACY3_Q96HD9_OID30086_v1_Cardiometabolic_II_expo_rt.txt	chr11	67233544	11:67001015:C:T:imp:v1	C	T	0.419582	0.71423	32862	ADD	-0.0579654	0.00905238	41.0027	9.81811	NA	1.52e-10	ACY3	rs12292083	0.00124617	41.0002
ACY3_Q96HD9_OID30086_v1_Cardiometabolic_II_expo_rt.txt	chr11	67265605	11:67033076:C:T:imp:v1	C	T	0.0468474	1.01082	32862	ADD	0.19577	0.0177684	121.393	27.5038	NA	3.13e-28	ACY3	rs11605263	0.00368045	121.386
ACY3_Q96HD9_OID30086_v1_Cardiometabolic_II_expo_rt.txt	chr11	67365333	11:67132804:G:A:imp:v1	G	A	0.0105745	0.992221	32862	ADD	-0.223043	0.0370475	36.2461	8.75967	NA	1.74e-09	ACY3	rs78755659	0.00110176	36.2437
ACY3_Q96HD9_OID30086_v1_Cardiometabolic_II_expo_rt.txt	chr11	67393462	11:67160933:G:A:imp:v1	G	A	0.169694	1.00706	32862	ADD	-0.0842496	0.010018	70.7258	16.3867	NA	4.1e-17	ACY3	rs2066490	0.00214756	70.7208
ACY3_Q96HD9_OID30086_v1_Cardiometabolic_II_expo_rt.txt	chr11	67447756	11:67215227:C:A:imp:v1	C	A	0.0349197	0.962891	32862	ADD	0.206268	0.0209563	96.8801	22.1328	NA	7.37e-23	ACY3	rs140494522	0.00293942	96.8742
ACY3_Q96HD9_OID30086_v1_Cardiometabolic_II_expo_rt.txt	chr11	67474745	11:67242216:G:A:imp:v1	G	A	0.0561591	0.998483	32862	ADD	0.179548	0.0164098	119.717	27.137	NA	7.29e-28	ACY3	rs12795957	0.00362979	119.709
ACY3_Q96HD9_OID30086_v1_Cardiometabolic_II_expo_rt.txt	chr11	67510517	11:67277988:C:T:imp:v1	C	T	0.0183342	1.01176	32862	ADD	-0.168676	0.0279662	36.3779	8.78905	NA	1.63e-09	ACY3	rs117361885	0.00110577	36.3759
ACY3_Q96HD9_OID30086_v1_Cardiometabolic_II_expo_rt.txt	chr11	67514600	11:67282071:G:T:imp:v1	G	T	0.0900128	1.00213	32862	ADD	-0.0961068	0.0131808	53.1646	12.5132	NA	3.07e-13	ACY3	rs74435565	0.00161521	53.1616
ACY3_Q96HD9_OID30086_v1_Cardiometabolic_II_expo_rt.txt	chr11	67529061	11:67296532:T:A:imp:v1	T	A	0.0162986	0.913561	32862	ADD	0.210187	0.0311823	45.4358	10.8021	NA	1.58e-11	ACY3	rs150854589	0.00138071	45.4327
ACY3_Q96HD9_OID30086_v1_Cardiometabolic_II_expo_rt.txt	chr11	67534094	11:67301565:G:A:imp:v1	G	A	0.0857286	0.963414	32862	ADD	-0.0983015	0.0137407	51.1804	12.0744	NA	8.43e-13	ACY3	rs4930201	0.00155501	51.1772
ACY3_Q96HD9_OID30086_v1_Cardiometabolic_II_expo_rt.txt	chr11	67545765	11:67313236:T:A:imp:v1	T	A	0.0274551	0.877191	32862	ADD	-0.195711	0.024667	62.95	14.6736	NA	2.12e-15	ACY3	rs681039	0.00191193	62.9465
ACY3_Q96HD9_OID30086_v1_Cardiometabolic_II_expo_rt.txt	chr11	67577307	11:67344778:G:C:imp:v1	G	C	0.0181025	0.921875	32862	ADD	-0.195124	0.0294892	43.7822	10.4353	NA	3.67e-11	ACY3	rs112695863	0.00133052	43.7793
ACY3_Q96HD9_OID30086_v1_Cardiometabolic_II_expo_rt.txt	chr11	67588326	11:67355797:G:A:imp:v1	G	A	0.0775599	0.975803	32862	ADD	0.12563	0.0142848	77.3462	17.8432	NA	1.43e-18	ACY3	rs79512139	0.00234814	77.3414
ACY3_Q96HD9_OID30086_v1_Cardiometabolic_II_expo_rt.txt	chr11	67609416	11:67376887:G:C:imp:v1	G	C	0.0898401	0.930703	32862	ADD	-0.113714	0.01368	69.096	16.0279	NA	9.38e-17	ACY3	rs72932599	0.00209821	69.0922
ACY3_Q96HD9_OID30086_v1_Cardiometabolic_II_expo_rt.txt	chr11	67631259	11:67398730:G:A:imp:v1	G	A	0.106542	1.0021	32862	ADD	-0.276803	0.012229	512.337	112.706	NA	1.97e-113	ACY3	rs2361137	0.0153514	512.311
ACY3_Q96HD9_OID30086_v1_Cardiometabolic_II_expo_rt.txt	chr11	67633828	11:67401299:C:A:imp:v1	C	A	0.0543333	0.998808	32862	ADD	0.200467	0.0166624	144.748	32.6128	NA	2.44e-33	ACY3	rs117624050	0.00438539	144.739
ACY3_Q96HD9_OID30086_v1_Cardiometabolic_II_expo_rt.txt	chr11	67634891	11:67402362:T:G:imp:v1	T	G	0.312397	0.996023	32862	ADD	0.274456	0.00816017	1131.22	247.267	NA	5.41e-248	ACY3	rs3758938	0.0332778	1131.15
ACY3_Q96HD9_OID30086_v1_Cardiometabolic_II_expo_rt.txt	chr11	67639719	11:67407190:T:C:imp:v1	T	C	0.0279421	0.96989	32862	ADD	-0.141493	0.0232508	37.0335	8.93511	NA	1.16e-09	ACY3	rs4608079	0.00112567	37.0312
ACY3_Q96HD9_OID30086_v1_Cardiometabolic_II_expo_rt.txt	chr11	67645535	11:67413006:T:C:imp:v1	T	C	0.818061	0.994457	32862	ADD	-0.248622	0.00981024	642.274	140.971	NA	1.07e-141	ACY3	rs2290958	0.0191699	642.234
ACY3_Q96HD9_OID30086_v1_Cardiometabolic_II_expo_rt.txt	chr11	67645593	11:67413064:G:A:imp:v1	G	A	0.0650447	0.988475	32862	ADD	-0.0841634	0.0153929	29.8954	7.34104	NA	4.56e-08	ACY3	rs77248329	0.000908901	29.8937
ACY3_Q96HD9_OID30086_v1_Cardiometabolic_II_expo_rt.txt	chr11	67646029	11:67413500:T:C:imp:v1	T	C	0.0265359	0.800569	32862	ADD	-0.19181	0.0262427	53.4227	12.5703	NA	2.69e-13	ACY3	rs149993255	0.00162303	53.4194
ACY3_Q96HD9_OID30086_v1_Cardiometabolic_II_expo_rt.txt	chr11	67649492	11:67416963:A:G:imp:v1	A	G	0.648682	1.00107	32862	ADD	-0.122262	0.00790356	239.298	53.2523	NA	5.59e-54	ACY3	rs2514039	0.00722924	239.283
ACY3_Q96HD9_OID30086_v1_Cardiometabolic_II_expo_rt.txt	chr11	67712533	11:67480004:T:C:imp:v1	T	C	0.0295465	0.759068	32862	ADD	0.261914	0.025579	104.846	23.8794	NA	1.32e-24	ACY3	rs368719209	0.00318033	104.839
ACY3_Q96HD9_OID30086_v1_Cardiometabolic_II_expo_rt.txt	chr11	67716856	11:67484327:A:G:imp:v1	A	G	0.352475	0.885674	32862	ADD	-0.0677593	0.0083947	65.1518	15.159	NA	6.93e-16	ACY3	rs10400364	0.00197867	65.148
ACY3_Q96HD9_OID30086_v1_Cardiometabolic_II_expo_rt.txt	chr11	67718189	11:67485660:A:C:imp:v1	A	C	0.0152342	0.894764	32862	ADD	-0.249977	0.0326043	58.7826	13.7543	NA	1.76e-14	ACY3	rs192744022	0.00178558	58.7792
ACY3_Q96HD9_OID30086_v1_Cardiometabolic_II_expo_rt.txt	chr11	67729706	11:67497177:A:G:imp:v1	A	G	0.473137	0.944116	32862	ADD	-0.0918511	0.00777861	139.433	31.4507	NA	3.54e-32	ACY3	rs10896198	0.00422505	139.424
ACY3_Q96HD9_OID30086_v1_Cardiometabolic_II_expo_rt.txt	chr11	67737155	11:67504626:G:T:imp:v1	G	T	0.01234	0.838979	32862	ADD	0.234891	0.0373195	39.615	9.50963	NA	3.09e-10	ACY3	rs181831722	0.00120405	39.6127
ACY3_Q96HD9_OID30086_v1_Cardiometabolic_II_expo_rt.txt	chr11	67757564	11:67525035:A:G:imp:v1	A	G	0.426132	0.980889	32862	ADD	0.0664437	0.0077081	74.3041	17.1742	NA	6.7e-18	ACY3	rs35959430	0.00225599	74.2996
ACY3_Q96HD9_OID30086_v1_Cardiometabolic_II_expo_rt.txt	chr11	67761430	11:67528901:C:T:imp:v1	C	T	0.0202994	0.851481	32862	ADD	0.232573	0.0290034	64.3012	14.9715	NA	1.07e-15	ACY3	rs28855481	0.00195289	64.2975
ACY3_Q96HD9_OID30086_v1_Cardiometabolic_II_expo_rt.txt	chr11	67764608	11:67532079:C:T:imp:v1	C	T	0.382263	0.951887	32862	ADD	0.0599733	0.00796229	56.7336	13.3019	NA	4.99e-14	ACY3	rs55931522	0.00172344	56.7301
ACY3_Q96HD9_OID30086_v1_Cardiometabolic_II_expo_rt.txt	chr11	67799427	11:67566898:C:T:imp:v1	C	T	0.458207	0.854467	32862	ADD	0.0607231	0.00819573	54.895	12.8957	NA	1.27e-13	ACY3	rs76473208	0.00166768	54.8916
ACY3_Q96HD9_OID30086_v1_Cardiometabolic_II_expo_rt.txt	chr11	67867866	11:67635337:C:G:imp:v1	C	G	0.0510959	0.882782	32862	ADD	0.102998	0.0182573	31.8262	7.77313	NA	1.69e-08	ACY3	rs145482395	0.000967543	31.8242
ACY3_Q96HD9_OID30086_v1_Cardiometabolic_II_expo_rt.txt	chr11	68027535	11:67795003:C:T:imp:v1	C	T	0.439805	0.998619	32862	ADD	-0.0458136	0.00761294	36.2146	8.75266	NA	1.77e-09	ACY3	rs308342	0.00110081	36.2124
ACY3_Q96HD9_OID30086_v1_Cardiometabolic_II_expo_rt.txt	chr11	68183321	11:67950788:A:G:imp:v1	A	G	0.0176428	0.967594	32862	ADD	0.159604	0.0291418	29.9953	7.36341	NA	4.33e-08	ACY3	rs74996158	0.000911936	29.9936
ACYP1_P07311_OID30642_v1_Inflammation_II_expo_rt.txt	chr14	74230040	14:74696743:C:T:imp:v1	C	T	0.338297	0.990656	33058	ADD	0.0436571	0.00791744	30.4046	7.45507	NA	3.51e-08	ACYP1	rs35797567	0.000918892	30.4028
ACYP1_P07311_OID30642_v1_Inflammation_II_expo_rt.txt	chr14	74298222	14:74764925:C:T:imp:v1	C	T	0.0173286	0.919401	33058	ADD	0.186768	0.0297979	39.2856	9.43636	NA	3.66e-10	ACYP1	rs146373050	0.00118697	39.2832
ACYP1_P07311_OID30642_v1_Inflammation_II_expo_rt.txt	chr14	74640257	14:75106960:A:G:imp:v1	A	G	0.553246	1.00582	33058	ADD	-0.0511307	0.00747748	46.7577	11.0951	NA	8.03e-12	ACYP1	rs6574188	0.00141242	46.7549
ACYP1_P07311_OID30642_v1_Inflammation_II_expo_rt.txt	chr14	74740807	14:75207510:C:T:imp:v1	C	T	0.129451	0.983171	33058	ADD	0.070367	0.0112039	39.446	9.47203	NA	3.37e-10	ACYP1	rs11626630	0.0011918	39.4433
ACYP1_P07311_OID30642_v1_Inflammation_II_expo_rt.txt	chr14	74841179	14:75307882:C:A:imp:v1	C	A	0.0209245	0.979489	33058	ADD	-0.304068	0.026314	133.526	30.1589	NA	6.94e-31	ACYP1	rs117218731	0.00402291	133.518
ACYP1_P07311_OID30642_v1_Inflammation_II_expo_rt.txt	chr14	74881078	14:75347781:A:C:imp:v1	A	C	0.0932282	0.992412	33058	ADD	-0.092545	0.0128727	51.6851	12.186	NA	6.52e-13	ACYP1	rs34338624	0.00156103	51.6821
ACYP1_P07311_OID30642_v1_Inflammation_II_expo_rt.txt	chr14	75040954	14:75507657:C:A:imp:v1	C	A	0.0549437	0.994271	33058	ADD	0.165864	0.0164171	102.073	23.2716	NA	5.35e-24	ACYP1	rs68179743	0.00307819	102.067
ACYP1_P07311_OID30642_v1_Inflammation_II_expo_rt.txt	chr14	75063338	14:75530041:C:G:imp:v1	C	G	0.0110197	0.996531	33058	ADD	-1.26254	0.0357813	1245.03	272.001	NA	9.98e-273	ACYP1	rs75948138	0.0362949	1244.95
ACYP1_P07311_OID30642_v1_Inflammation_II_expo_rt.txt	chr14	75066238	14:75532941:T:C:imp:v1	T	C	0.476299	0.997748	33058	ADD	-0.157744	0.00747584	445.231	98.1039	NA	7.87e-99	ACYP1	rs7156328	0.0132892	445.204
ACYP1_P07311_OID30642_v1_Inflammation_II_expo_rt.txt	chr14	75108274	14:75574977:G:A:imp:v1	G	A	0.0537826	0.996531	33058	ADD	-0.103154	0.0165585	38.8085	9.33022	NA	4.67e-10	ACYP1	rs148685672	0.00117258	38.8064
ACYP1_P07311_OID30642_v1_Inflammation_II_expo_rt.txt	chr14	75233255	14:75699958:G:T:imp:v1	G	T	0.031448	0.87275	33058	ADD	-0.154368	0.0228714	45.5544	10.8284	NA	1.48e-11	ACYP1	rs73313657	0.00137611	45.5515
ADA2_Q9NZK5_OID20394_v1_Cardiometabolic_expo_rt.txt	chr22	17113326	22:17594216:A:G:imp:v1	A	G	0.168446	0.993535	33410	ADD	-0.0653263	0.00981146	44.3311	10.5571	NA	2.77e-11	ADA2	rs9605216	0.00132512	44.3285
ADA2_Q9NZK5_OID20394_v1_Cardiometabolic_expo_rt.txt	chr22	17113865	22:17594755:G:A:imp:v1	G	A	0.10021	1.03369	33410	ADD	0.0821373	0.0119836	46.9795	11.1443	NA	7.17e-12	ADA2	rs11703539	0.00140417	46.9765
ADA2_Q9NZK5_OID20394_v1_Cardiometabolic_expo_rt.txt	chr22	17127714	22:17608604:T:C:imp:v1	T	C	0.0377943	0.958806	33410	ADD	0.115494	0.0195939	34.7437	8.42471	NA	3.76e-09	ADA2	rs8136981	0.00103884	34.7417
ADA2_Q9NZK5_OID20394_v1_Cardiometabolic_expo_rt.txt	chr22	17145677	22:17626567:G:A:imp:v1	G	A	0.0291105	0.887106	33410	ADD	0.200465	0.0231059	75.2711	17.3869	NA	4.1e-18	ADA2	rs139923027	0.0022479	75.2671
ADA2_Q9NZK5_OID20394_v1_Cardiometabolic_expo_rt.txt	chr22	17151304	22:17632194:C:T:imp:v1	C	T	0.254674	0.99499	33410	ADD	-0.0700899	0.00842485	69.2128	16.0536	NA	8.84e-17	ADA2	rs34902370	0.00206734	69.2087
ADA2_Q9NZK5_OID20394_v1_Cardiometabolic_expo_rt.txt	chr22	17169585	22:17650475:A:T:imp:v1	A	T	0.0409563	0.987538	33410	ADD	0.111315	0.0185799	35.894	8.6812	NA	2.08e-09	ADA2	rs74995475	0.00107319	35.8918
ADA2_Q9NZK5_OID20394_v1_Cardiometabolic_expo_rt.txt	chr22	17170910	22:17651800:G:A:imp:v1	G	A	0.856961	0.983759	33410	ADD	0.0983101	0.0105375	87.0404	19.9734	NA	1.06e-20	ADA2	rs5748927	0.00259845	87.0352
ADA2_Q9NZK5_OID20394_v1_Cardiometabolic_expo_rt.txt	chr22	17172148	22:17653038:C:T:imp:v1	C	T	0.31918	0.996159	33410	ADD	0.123821	0.00786674	247.741	55.093	NA	8.07e-56	ADA2	rs6518669	0.00736061	247.727
ADA2_Q9NZK5_OID20394_v1_Cardiometabolic_expo_rt.txt	chr22	17188416	22:17669306:T:C:imp:v1	T	C	0.320638	1.00401	33410	ADD	-0.0922248	0.00782417	138.937	31.3423	NA	4.55e-32	ADA2	rs2231495	0.00414133	138.929
ADA2_Q9NZK5_OID20394_v1_Cardiometabolic_expo_rt.txt	chr22	17198659	22:17679549:C:G:imp:v1	C	G	0.0418353	0.980577	33410	ADD	-0.176629	0.018453	91.6202	20.9788	NA	1.05e-21	ADA2	rs3788277	0.00273479	91.6145
ADA2_Q9NZK5_OID20394_v1_Cardiometabolic_expo_rt.txt	chr22	17204794	22:17685684:C:CT:imp:v1	C	CT	0.388653	0.811483	33410	ADD	0.0853491	0.00833247	104.918	23.8952	NA	1.27e-24	ADA2	rs375105235	0.00313049	104.912
ADA2_Q9NZK5_OID20394_v1_Cardiometabolic_expo_rt.txt	chr22	17207323	22:17688213:G:A:imp:v1	G	A	0.0562272	0.949303	33410	ADD	-0.131521	0.0163012	65.0958	15.1467	NA	7.13e-16	ADA2	rs77656474	0.00194459	65.0916
ADA2_Q9NZK5_OID20394_v1_Cardiometabolic_expo_rt.txt	chr22	17216548	22:17697438:C:T:imp:v1	C	T	0.0401817	0.945933	33410	ADD	0.140791	0.0191723	53.9264	12.6816	NA	2.08e-13	ADA2	rs11705022	0.00161148	53.9232
ADA2_Q9NZK5_OID20394_v1_Cardiometabolic_expo_rt.txt	chr22	17217116	22:17698006:A:C:imp:v1	A	C	0.0358122	0.989516	33410	ADD	0.178438	0.0197969	81.2414	18.6995	NA	2e-19	ADA2	rs73876663	0.00242577	81.2371
ADA2_Q9NZK5_OID20394_v1_Cardiometabolic_expo_rt.txt	chr22	17225677	22:17706567:C:T:imp:v1	C	T	0.0690532	0.840895	33410	ADD	0.128214	0.0157347	66.3977	15.4335	NA	3.69e-16	ADA2	rs112144326	0.00198342	66.3939
ADA2_Q9NZK5_OID20394_v1_Cardiometabolic_expo_rt.txt	chr22	17228881	22:17709771:T:C:imp:v1	T	C	0.61157	0.982576	33410	ADD	0.206755	0.00757212	745.554	163.43	NA	3.72e-164	ADA2	rs737963	0.0218281	745.506
ADA2_Q9NZK5_OID20394_v1_Cardiometabolic_expo_rt.txt	chr22	17232543	22:17713433:G:A:imp:v1	G	A	0.0467076	1.00075	33410	ADD	-0.116	0.0173387	44.7593	10.6521	NA	2.23e-11	ADA2	rs4819565	0.0013379	44.7566
ADA2_Q9NZK5_OID20394_v1_Cardiometabolic_expo_rt.txt	chr22	17234205	22:17715095:C:A:imp:v1	C	A	0.271747	0.727171	33410	ADD	0.0659338	0.00964521	46.7296	11.0889	NA	8.15e-12	ADA2	rs34611736	0.00139672	46.7269
ADA2_Q9NZK5_OID20394_v1_Cardiometabolic_expo_rt.txt	chr22	17237229	22:17718119:G:T:imp:v1	G	T	0.572009	0.778035	33410	ADD	-0.103681	0.00838229	152.994	34.4154	NA	3.84e-35	ADA2	rs4819979	0.0045584	152.984
ADA2_Q9NZK5_OID20394_v1_Cardiometabolic_expo_rt.txt	chr22	17242092	22:17722982:G:T:imp:v1	G	T	0.513337	0.970533	33410	ADD	-0.164782	0.00743032	491.819	108.242	NA	5.73e-109	ADA2	rs727188	0.0145071	491.789
ADA2_Q9NZK5_OID20394_v1_Cardiometabolic_expo_rt.txt	chr22	17242822	22:17723712:C:T:imp:v1	C	T	0.0384765	1.00772	33410	ADD	-0.106068	0.0189462	31.3417	7.66479	NA	2.16e-08	ADA2	rs117577985	0.000937218	31.34
ADA2_Q9NZK5_OID20394_v1_Cardiometabolic_expo_rt.txt	chr22	17245009	22:17725899:T:C:imp:v1	T	C	0.425721	0.825795	33410	ADD	-0.0857642	0.00814486	110.878	25.2011	NA	6.29e-26	ADA2	rs62236466	0.00330773	110.871
ADA2_Q9NZK5_OID20394_v1_Cardiometabolic_expo_rt.txt	chr22	17248840	22:17729730:C:T:imp:v1	C	T	0.128546	0.970599	33410	ADD	-0.0689437	0.0110927	38.6293	9.29036	NA	5.12e-10	ADA2	rs147836724	0.00115488	38.6268
ADAM12_O43184_OID30491_v1_Inflammation_II_expo_rt.txt	chr10	125859057	10:127547626:T:G:imp:v1	T	G	0.0451952	0.908089	32981	ADD	0.118784	0.0192417	38.109	9.17458	NA	6.69e-10	ADAM12	rs2366048	0.00115415	38.1068
ADAM12_O43184_OID30491_v1_Inflammation_II_expo_rt.txt	chr10	125940745	10:127629314:G:A:imp:v1	G	A	0.0580022	0.957987	32981	ADD	-0.146089	0.0166502	76.9839	17.7636	NA	1.72e-18	ADAM12	rs118139915	0.00232873	76.9786
ADAM12_O43184_OID30491_v1_Inflammation_II_expo_rt.txt	chr10	125971813	10:127660382:A:G:imp:v1	A	G	0.403923	0.919148	32981	ADD	-0.0575687	0.00809716	50.5483	11.9345	NA	1.16e-12	ADAM12	rs9804394	0.00153031	50.5453
ADAM12_O43184_OID30491_v1_Inflammation_II_expo_rt.txt	chr10	125997307	10:127685876:A:C:imp:v1	A	C	0.0538189	1.00088	32981	ADD	0.106011	0.0168759	39.4612	9.47542	NA	3.35e-10	ADAM12	rs61863577	0.00119505	39.4586
ADAM12_O43184_OID30491_v1_Inflammation_II_expo_rt.txt	chr10	126011497	10:127700066:T:C:imp:v1	T	C	0.407826	1.00446	32981	ADD	0.123902	0.00773557	256.55	57.0135	NA	9.69e-58	ADAM12	rs10901514	0.00771868	256.534
ADAM12_O43184_OID30491_v1_Inflammation_II_expo_rt.txt	chr10	126060270	10:127748839:T:C:imp:v1	T	C	0.328826	0.995923	32981	ADD	-0.0538518	0.00812367	43.9437	10.4711	NA	3.38e-11	ADAM12	rs7076519	0.00133062	43.941
ADAM12_O43184_OID30491_v1_Inflammation_II_expo_rt.txt	chr10	126071252	10:127759821:A:G:imp:v1	A	G	0.639895	0.994605	32981	ADD	-0.072483	0.00795847	82.9493	19.0748	NA	8.42e-20	ADAM12	rs1152656	0.00250876	82.9444
ADAM12_O43184_OID30491_v1_Inflammation_II_expo_rt.txt	chr10	126096518	10:127785087:T:C:imp:v1	T	C	0.748269	0.994782	32981	ADD	0.0604981	0.00880129	47.2488	11.2039	NA	6.25e-12	ADAM12	rs3758422	0.00143056	47.2459
ADAM12_O43184_OID30491_v1_Inflammation_II_expo_rt.txt	chr10	126241482	10:127930051:C:A:imp:v1	C	A	0.264918	0.995867	32981	ADD	-0.0525229	0.00864784	36.8877	8.90262	NA	1.25e-09	ADAM12	rs4962530	0.00111721	36.8855
ADAM12_O43184_OID30491_v1_Inflammation_II_expo_rt.txt	chr10	126241887	10:127930456:G:A:imp:v1	G	A	0.0586036	0.970154	32981	ADD	-0.117015	0.016465	50.5078	11.9256	NA	1.19e-12	ADAM12	rs11596023	0.00152908	50.5049
ADAM12_O43184_OID30491_v1_Inflammation_II_expo_rt.txt	chr10	126245861	10:127934430:A:G:imp:v1	A	G	0.0783234	0.95957	32981	ADD	0.105657	0.0144751	53.2782	12.5384	NA	2.89e-13	ADAM12	rs76191188	0.00161283	53.2754
ADAM12_O43184_OID30491_v1_Inflammation_II_expo_rt.txt	chr10	126256024	10:127944593:T:C:imp:v1	T	C	0.609433	1.00076	32981	ADD	0.129391	0.00780317	274.96	61.026	NA	9.42e-62	ADAM12	rs11244909	0.00826793	274.941
ADAM12_O43184_OID30491_v1_Inflammation_II_expo_rt.txt	chr10	126267823	10:127956392:G:A:imp:v1	G	A	0.0192384	0.977694	32981	ADD	-0.160414	0.0280504	32.7046	7.96946	NA	1.07e-08	ADAM12	rs57333628	0.000990632	32.7024
ADAM12_O43184_OID30491_v1_Inflammation_II_expo_rt.txt	chr10	126280325	10:127968894:A:G:imp:v1	A	G	0.0545348	0.962828	32981	ADD	-0.122702	0.0170955	51.5156	12.1486	NA	7.1e-13	ADAM12	rs71490762	0.00155955	51.5126
ADAM12_O43184_OID30491_v1_Inflammation_II_expo_rt.txt	chr10	126311042	10:127999611:T:C:imp:v1	T	C	0.665372	0.953624	32981	ADD	0.0473783	0.00827237	32.8019	7.99121	NA	1.02e-08	ADAM12	rs4962549	0.000993582	32.7999
ADAM12_O43184_OID30491_v1_Inflammation_II_expo_rt.txt	chr10	126342832	10:128031401:G:C:imp:v1	G	C	0.080137	0.998436	32981	ADD	0.0832712	0.014044	35.1568	8.51684	NA	3.04e-09	ADAM12	rs9422971	0.00106483	35.1546
ADAM12_O43184_OID30491_v1_Inflammation_II_expo_rt.txt	chr10	126350148	10:128038717:T:C:imp:v1	T	C	0.551224	0.999182	32981	ADD	-0.104229	0.00766704	184.808	41.3644	NA	4.32e-42	ADAM12	rs7082031	0.00557226	184.797
ADAM12_O43184_OID30491_v1_Inflammation_II_expo_rt.txt	chr10	126378592	10:128067161:G:A:imp:v1	G	A	0.095941	0.991371	32981	ADD	0.0994462	0.0129916	58.594	13.7126	NA	1.94e-14	ADAM12	rs10901605	0.00177344	58.5902
ADAM12_O43184_OID30491_v1_Inflammation_II_expo_rt.txt	chr10	126381232	10:128069801:T:C:imp:v1	T	C	0.0201929	0.936089	32981	ADD	-0.16413	0.0279897	34.3857	8.34484	NA	4.52e-09	ADAM12	rs146134123	0.00104151	34.3837
ADAM12_O43184_OID30491_v1_Inflammation_II_expo_rt.txt	chr10	126403092	10:128091661:T:C:imp:v1	T	C	0.148055	0.912909	32981	ADD	-0.0884154	0.0112291	61.9965	14.4634	NA	3.44e-15	ADAM12	rs60522642	0.00187623	61.9926
ADAM15_Q13444_OID20109_v1_Cardiometabolic_expo_rt.txt	chr1	154233537	1:154206013:C:A:imp:v1	C	A	0.0206544	0.99439	33043	ADD	0.183966	0.026575	47.9213	11.3529	NA	4.44e-12	ADAM15	rs151150431	0.00144817	47.9184
ADAM15_Q13444_OID20109_v1_Cardiometabolic_expo_rt.txt	chr1	154443593	1:154416069:G:A:imp:v1	G	A	0.0275247	0.997701	33043	ADD	-0.147632	0.0230712	40.9471	9.80574	NA	1.56e-10	ADAM15	rs116141616	0.00123767	40.9444
ADAM15_Q13444_OID20109_v1_Cardiometabolic_expo_rt.txt	chr1	154477889	1:154450365:T:A:imp:v1	T	A	0.0237022	0.836632	33043	ADD	-0.202375	0.0270991	55.7703	13.0891	NA	8.15e-14	ADAM15	rs185104823	0.00168497	55.7671
ADAM15_Q13444_OID20109_v1_Cardiometabolic_expo_rt.txt	chr1	154673461	1:154645937:T:C:imp:v1	T	C	0.0217534	0.961114	33043	ADD	-0.196659	0.0263682	55.6246	13.0569	NA	8.77e-14	ADAM15	rs149481318	0.00168057	55.6212
ADAM15_Q13444_OID20109_v1_Cardiometabolic_expo_rt.txt	chr1	154720528	1:154693004:T:C:imp:v1	T	C	0.10398	0.930173	33043	ADD	0.0905831	0.0128054	50.0387	11.8218	NA	1.51e-12	ADAM15	rs77510509	0.00151207	50.0359
ADAM15_Q13444_OID20109_v1_Cardiometabolic_expo_rt.txt	chr1	154738604	1:154711080:T:A:imp:v1	T	A	0.819208	0.803016	33043	ADD	0.0673008	0.0109347	37.8816	9.12395	NA	7.52e-10	ADAM15	rs10752606	0.00114512	37.8792
ADAM15_Q13444_OID20109_v1_Cardiometabolic_expo_rt.txt	chr1	154741023	1:154713499:A:C:imp:v1	A	C	0.151082	0.994239	33043	ADD	0.0627871	0.0105585	35.3623	8.56267	NA	2.74e-09	ADAM15	rs12145386	0.00106904	35.3598
ADAM15_Q13444_OID20109_v1_Cardiometabolic_expo_rt.txt	chr1	154742331	1:154714807:G:A:imp:v1	G	A	0.0145382	0.934787	33043	ADD	-0.184382	0.0325634	32.0611	7.82565	NA	1.49e-08	ADAM15	rs12120146	0.000969342	32.0591
ADAM15_Q13444_OID20109_v1_Cardiometabolic_expo_rt.txt	chr1	154743489	1:154715965:C:T:imp:v1	C	T	0.0111807	0.878303	33043	ADD	0.269605	0.0382481	49.6863	11.7438	NA	1.8e-12	ADAM15	rs138960065	0.00150143	49.6832
ADAM15_Q13444_OID20109_v1_Cardiometabolic_expo_rt.txt	chr1	154756918	1:154729394:C:T:imp:v1	C	T	0.456899	0.958016	33043	ADD	-0.0741332	0.0077342	91.8744	21.0345	NA	9.24e-22	ADAM15	rs10908435	0.00277274	91.8689
ADAM15_Q13444_OID20109_v1_Cardiometabolic_expo_rt.txt	chr1	154757602	1:154730078:C:T:imp:v1	C	T	0.020198	0.833967	33043	ADD	0.271254	0.029357	85.3747	19.6076	NA	2.47e-20	ADAM15	rs80046922	0.00257709	85.3695
ADAM15_Q13444_OID20109_v1_Cardiometabolic_expo_rt.txt	chr1	154772331	1:154744807:C:T:imp:v1	C	T	0.0148551	0.955655	33043	ADD	0.542467	0.0318747	289.638	64.2245	NA	5.96e-65	ADAM15	rs1051614	0.0086893	289.62
ADAM15_Q13444_OID20109_v1_Cardiometabolic_expo_rt.txt	chr1	154783687	1:154756163:T:G:imp:v1	T	G	0.057289	0.994706	33043	ADD	-0.172864	0.0162742	112.826	25.6279	NA	2.36e-26	ADAM15	rs77319913	0.00340291	112.819
ADAM15_Q13444_OID20109_v1_Cardiometabolic_expo_rt.txt	chr1	154783949	1:154756425:C:G:imp:v1	C	G	0.380148	0.994035	33043	ADD	0.131278	0.00779099	283.92	62.9787	NA	1.05e-63	ADAM15	rs11590325	0.00851929	283.905
ADAM15_Q13444_OID20109_v1_Cardiometabolic_expo_rt.txt	chr1	154787805	1:154760281:C:G:imp:v1	C	G	0.0132493	0.956279	33043	ADD	0.194582	0.0337211	33.297	8.10179	NA	7.91e-09	ADAM15	rs141649213	0.00100666	33.2947
ADAM15_Q13444_OID20109_v1_Cardiometabolic_expo_rt.txt	chr1	154793446	1:154765922:A:G:imp:v1	A	G	0.0789289	0.997195	33043	ADD	0.13305	0.0140002	90.3146	20.6922	NA	2.03e-21	ADAM15	rs78740479	0.00272581	90.3098
ADAM15_Q13444_OID20109_v1_Cardiometabolic_expo_rt.txt	chr1	154797274	1:154769750:T:C:imp:v1	T	C	0.0329419	0.998236	33043	ADD	-0.287582	0.0211405	185.052	41.4176	NA	3.82e-42	ADAM15	rs72700262	0.00556914	185.04
ADAM15_Q13444_OID20109_v1_Cardiometabolic_expo_rt.txt	chr1	154804681	1:154777157:G:A:imp:v1	G	A	0.269541	0.995364	33043	ADD	-0.1245	0.00851646	213.709	47.6714	NA	2.13e-48	ADAM15	rs1702176	0.00642601	213.695
ADAM15_Q13444_OID20109_v1_Cardiometabolic_expo_rt.txt	chr1	154807209	1:154779685:A:G:imp:v1	A	G	0.823841	0.984273	33043	ADD	-0.143611	0.00997499	207.276	46.2678	NA	5.4e-47	ADAM15	rs2798601	0.00623383	207.264
ADAM15_Q13444_OID20109_v1_Cardiometabolic_expo_rt.txt	chr1	154814737	1:154787213:G:A:imp:v1	G	A	0.182839	0.871119	33043	ADD	0.057078	0.0104489	29.84	7.32864	NA	4.69e-08	ADAM15	rs1106235	0.000902246	29.838
ADAM15_Q13444_OID20109_v1_Cardiometabolic_expo_rt.txt	chr1	154815259	1:154787735:T:C:imp:v1	T	C	0.322882	1.00528	33043	ADD	0.19493	0.00804274	587.422	129.04	NA	9.12e-130	ADAM15	rs11264265	0.0174669	587.385
ADAM15_Q13444_OID20109_v1_Cardiometabolic_expo_rt.txt	chr1	154817399	1:154789875:A:G:imp:v1	A	G	0.735662	0.981631	33043	ADD	0.0933046	0.00862761	116.957	26.5326	NA	2.93e-27	ADAM15	rs1218603	0.00352705	116.95
ADAM15_Q13444_OID20109_v1_Cardiometabolic_expo_rt.txt	chr1	154823314	1:154795790:A:G:imp:v1	A	G	0.276822	0.99067	33043	ADD	-0.0647845	0.00846653	58.5505	13.703	NA	1.98e-14	ADAM15	rs6426969	0.00176882	58.5471
ADAM15_Q13444_OID20109_v1_Cardiometabolic_expo_rt.txt	chr1	154825364	1:154797840:AT:A:imp:v1	AT	A	0.485934	0.935482	33043	ADD	0.0938706	0.00779782	144.915	32.6494	NA	2.24e-33	ADAM15	rs58743378	0.00436649	144.906
ADAM15_Q13444_OID20109_v1_Cardiometabolic_expo_rt.txt	chr1	154825760	1:154798236:G:A:imp:v1	G	A	0.12654	0.940228	33043	ADD	-0.130024	0.0116939	123.631	27.9937	NA	1.01e-28	ADAM15	rs72700286	0.00372758	123.624
ADAM15_Q13444_OID20109_v1_Cardiometabolic_expo_rt.txt	chr1	154839201	1:154811677:A:G:imp:v1	A	G	0.871542	1.00661	33043	ADD	-0.175545	0.0112424	243.814	54.2369	NA	5.8e-55	ADAM15	rs1218574	0.00732465	243.799
ADAM15_Q13444_OID20109_v1_Cardiometabolic_expo_rt.txt	chr1	154847208	1:154819684:C:T:imp:v1	C	T	0.225483	0.944166	33043	ADD	-0.192195	0.00928612	428.369	94.4341	NA	3.68e-95	ADAM15	rs11576820	0.012798	428.341
ADAM15_Q13444_OID20109_v1_Cardiometabolic_expo_rt.txt	chr1	154850431	1:154822907:C:T:imp:v1	C	T	0.473456	0.996446	33043	ADD	0.206638	0.00756593	745.926	163.511	NA	3.08e-164	ADAM15	rs906595	0.022076	745.881
ADAM15_Q13444_OID20109_v1_Cardiometabolic_expo_rt.txt	chr1	154856442	1:154828918:G:A:imp:v1	G	A	0.0176285	1.00652	33043	ADD	-0.389783	0.028545	186.46	41.7248	NA	1.88e-42	ADAM15	rs76024980	0.00561129	186.449
ADAM15_Q13444_OID20109_v1_Cardiometabolic_expo_rt.txt	chr1	154861574	1:154834050:G:A:imp:v1	G	A	0.011138	0.940396	33043	ADD	-0.516107	0.03705	194.046	43.3807	NA	4.16e-44	ADAM15	rs144140765	0.00583822	194.034
ADAM15_Q13444_OID20109_v1_Cardiometabolic_expo_rt.txt	chr1	154884415	1:154856891:C:T:imp:v1	C	T	0.0161608	1.01403	33043	ADD	0.848054	0.0297363	813.342	178.169	NA	6.78e-179	ADAM15	rs77243303	0.0240233	813.293
ADAM15_Q13444_OID20109_v1_Cardiometabolic_expo_rt.txt	chr1	154925709	1:154898185:G:C:imp:v1	G	C	0.0120592	0.998731	33043	ADD	0.356643	0.034567	106.449	24.2308	NA	5.88e-25	ADAM15	rs114138760	0.0032112	106.443
ADAM15_Q13444_OID20109_v1_Cardiometabolic_expo_rt.txt	chr1	154935003	1:154907479:G:A:imp:v1	G	A	0.0225696	0.986933	33043	ADD	-0.427047	0.0255381	279.625	62.0426	NA	9.07e-63	ADAM15	rs55861235	0.00839141	279.607
ADAM15_Q13444_OID20109_v1_Cardiometabolic_expo_rt.txt	chr1	154937272	1:154909748:G:C:imp:v1	G	C	0.0169051	0.976399	33043	ADD	-0.28438	0.029621	92.1721	21.0999	NA	7.95e-22	ADAM15	rs115341134	0.00278169	92.1663
ADAM15_Q13444_OID20109_v1_Cardiometabolic_expo_rt.txt	chr1	154945225	1:154917701:A:G:imp:v1	A	G	0.947296	1.00074	33043	ADD	-0.118356	0.0168773	49.1786	11.6314	NA	2.34e-12	ADAM15	rs906594	0.0014861	49.1754
ADAM15_Q13444_OID20109_v1_Cardiometabolic_expo_rt.txt	chr1	154962189	1:154934665:C:T:imp:v1	C	T	0.0219252	0.913091	33043	ADD	0.40676	0.0269387	227.993	50.787	NA	1.63e-51	ADAM15	rs7528548	0.00685263	227.98
ADAM15_Q13444_OID20109_v1_Cardiometabolic_expo_rt.txt	chr1	155017821	1:154990297:C:G:imp:v1	C	G	0.368448	0.988093	33043	ADD	0.354267	0.0078648	2029.02	442.348	NA	0	ADAM15	rs2242194	0.0578529	2028.9
ADAM15_Q13444_OID20109_v1_Cardiometabolic_expo_rt.txt	chr1	155039663	1:155012139:G:A:imp:v1	G	A	0.0574554	0.998838	33043	ADD	-0.35965	0.0162149	491.961	108.273	NA	5.33e-109	ADAM15	rs115888432	0.0146701	491.932
ADAM15_Q13444_OID20109_v1_Cardiometabolic_expo_rt.txt	chr1	155044909	1:155017385:T:A:imp:v1	T	A	0.612698	0.978847	33043	ADD	0.242228	0.00782568	958.088	209.635	NA	2.32e-210	ADAM15	rs10796937	0.0281781	958.028
ADAM15_Q13444_OID20109_v1_Cardiometabolic_expo_rt.txt	chr1	155049522	1:155021998:C:G:imp:v1	C	G	0.0208574	0.961716	33043	ADD	-0.161925	0.0269053	36.2201	8.75388	NA	1.76e-09	ADAM15	rs142803678	0.00109496	36.2181
ADAM15_Q13444_OID20109_v1_Cardiometabolic_expo_rt.txt	chr1	155054606	1:155027082:G:T:imp:v1	G	T	0.0374156	0.967787	33043	ADD	0.799293	0.0201957	1566.38	341.83	NA	0	ADAM15	rs145815601	0.0452585	1566.27
ADAM15_Q13444_OID20109_v1_Cardiometabolic_expo_rt.txt	chr1	155060841	1:155033317:T:C:imp:v1	T	C	0.70342	0.981272	33043	ADD	-0.678887	0.00833188	6639.09	1443.67	NA	0	ADAM15	rs11264304	0.167307	6638.69
ADAM15_Q13444_OID20109_v1_Cardiometabolic_expo_rt.txt	chr1	155068178	1:155040654:C:T:imp:v1	C	T	0.106145	0.998017	33043	ADD	-0.609407	0.0122481	2475.59	539.363	NA	0	ADAM15	rs6675468	0.0696982	2475.43
ADAM15_Q13444_OID20109_v1_Cardiometabolic_expo_rt.txt	chr1	155071721	1:155044197:T:G:imp:v1	T	G	0.0178338	0.95232	33043	ADD	0.935611	0.0291934	1027.12	224.641	NA	2.29e-225	ADAM15	rs77268551	0.0301472	1027.06
ADAM15_Q13444_OID20109_v1_Cardiometabolic_expo_rt.txt	chr1	155072656	1:155045132:G:A:imp:v1	G	A	0.0971661	0.983778	33043	ADD	-0.0839178	0.012833	42.7612	10.2087	NA	6.18e-11	ADAM15	rs72702267	0.00129244	42.7588
ADAM15_Q13444_OID20109_v1_Cardiometabolic_expo_rt.txt	chr1	155083387	1:155055863:G:A:imp:v1	G	A	0.138438	0.994752	33043	ADD	-0.539294	0.0109461	2427.34	528.88	NA	0	ADAM15	rs79382812	0.0684332	2427.2
ADAM15_Q13444_OID20109_v1_Cardiometabolic_expo_rt.txt	chr1	155127096	1:155099572:C:T:imp:v1	C	T	0.0103586	0.906219	33043	ADD	0.921367	0.0391569	553.666	121.697	NA	2.01e-122	ADAM15	rs148063273	0.0164798	553.634
ADAM15_Q13444_OID20109_v1_Cardiometabolic_expo_rt.txt	chr1	155127376	1:155099852:G:A:imp:v1	G	A	0.189106	0.983046	33043	ADD	0.538277	0.00972415	3064.14	667.212	NA	0	ADAM15	rs79976845	0.0848624	3063.95
ADAM15_Q13444_OID20109_v1_Cardiometabolic_expo_rt.txt	chr1	155131737	1:155104213:G:A:imp:v1	G	A	0.015495	1.00013	33043	ADD	-0.339544	0.0305208	123.766	28.0232	NA	9.48e-29	ADAM15	rs114746058	0.00373162	123.758
ADAM15_Q13444_OID20109_v1_Cardiometabolic_expo_rt.txt	chr1	155158322	1:155130798:C:T:imp:v1	C	T	0.163782	0.967782	33043	ADD	-0.104809	0.0103539	102.469	23.3583	NA	4.38e-24	ADAM15	rs4440846	0.00309147	102.462
ADAM15_Q13444_OID20109_v1_Cardiometabolic_expo_rt.txt	chr1	155159454	1:155131930:T:C:imp:v1	T	C	0.0282965	0.997295	33043	ADD	0.851947	0.0227753	1399.25	305.515	NA	3.05e-306	ADAM15	rs113625558	0.0406261	1399.17
ADAM15_Q13444_OID20109_v1_Cardiometabolic_expo_rt.txt	chr1	155223744	1:155193535:A:T:imp:v1	A	T	0.013318	0.930648	33043	ADD	0.816539	0.0340869	573.825	126.083	NA	8.26e-127	ADAM15	rs143478056	0.0170696	573.789
ADAM15_Q13444_OID20109_v1_Cardiometabolic_expo_rt.txt	chr1	155229524	1:155199315:C:G:imp:v1	C	G	0.289895	0.988229	33043	ADD	-0.361696	0.00835642	1873.47	408.552	NA	0	ADAM15	rs12407919	0.0536558	1873.36
ADAM15_Q13444_OID20109_v1_Cardiometabolic_expo_rt.txt	chr1	155249661	1:155219452:C:T:imp:v1	C	T	0.0303662	0.977636	33043	ADD	-0.135424	0.0222253	37.1274	8.95602	NA	1.11e-09	ADAM15	rs147869881	0.00112235	37.1253
ADAM15_Q13444_OID20109_v1_Cardiometabolic_expo_rt.txt	chr1	155275389	1:155245180:G:A:imp:v1	G	A	0.0110979	0.868985	33043	ADD	-0.463962	0.0385985	144.485	32.5555	NA	2.78e-33	ADAM15	rs144886967	0.00435361	144.477
ADAM15_Q13444_OID20109_v1_Cardiometabolic_expo_rt.txt	chr1	155286228	1:155256019:C:G:imp:v1	C	G	0.01397	0.969869	33043	ADD	-0.370765	0.0326213	129.181	29.2082	NA	6.19e-30	ADAM15	rs144733142	0.00389422	129.172
ADAM15_Q13444_OID20109_v1_Cardiometabolic_expo_rt.txt	chr1	155296818	1:155266609:C:G:imp:v1	C	G	0.0207709	0.973048	33043	ADD	-0.223392	0.0267985	69.4889	16.1144	NA	7.68e-17	ADAM15	rs115736167	0.00209857	69.4845
ADAM15_Q13444_OID20109_v1_Cardiometabolic_expo_rt.txt	chr1	155349776	1:155319567:G:A:imp:v1	G	A	0.0171917	0.909521	33043	ADD	0.842195	0.030408	767.098	168.114	NA	7.69e-169	ADAM15	rs144534405	0.0226884	767.049
ADAM15_Q13444_OID20109_v1_Cardiometabolic_expo_rt.txt	chr1	155397132	1:155366923:G:A:imp:v1	G	A	0.396894	0.7067	33043	ADD	-0.120109	0.00916586	171.714	38.5051	NA	3.13e-39	ADAM15	rs200238746	0.00516981	171.703
ADAM15_Q13444_OID20109_v1_Cardiometabolic_expo_rt.txt	chr1	155403057	1:155372848:C:T:imp:v1	C	T	0.0134759	0.995378	33043	ADD	-0.231466	0.0327612	49.9178	11.795	NA	1.6e-12	ADAM15	rs180817467	0.00150841	49.9147
ADAM15_Q13444_OID20109_v1_Cardiometabolic_expo_rt.txt	chr1	155416654	1:155386445:G:A:imp:v1	G	A	0.0370529	0.98886	33043	ADD	-0.455874	0.02007	515.937	113.489	NA	3.24e-114	ADAM15	rs111360475	0.015374	515.904
ADAM15_Q13444_OID20109_v1_Cardiometabolic_expo_rt.txt	chr1	155551488	1:155521279:G:A:imp:v1	G	A	0.135956	0.928908	33043	ADD	0.159144	0.0114132	194.432	43.4649	NA	3.43e-44	ADAM15	rs111293015	0.00584976	194.419
ADAM15_Q13444_OID20109_v1_Cardiometabolic_expo_rt.txt	chr1	155575796	1:155545587:T:A:imp:v1	T	A	0.0197502	0.771231	33043	ADD	-0.617801	0.0308533	400.952	88.4664	NA	3.42e-89	ADAM15	rs201712496	0.0119888	400.929
ADAM15_Q13444_OID20109_v1_Cardiometabolic_expo_rt.txt	chr1	155828176	1:155797967:G:A:imp:v1	G	A	0.0666208	0.734265	33043	ADD	-0.106075	0.0176433	36.1468	8.73755	NA	1.83e-09	ADAM15	rs199972531	0.00109273	36.1443
ADAM15_Q13444_OID20109_v1_Cardiometabolic_expo_rt.txt	chr1	155872777	1:155842568:T:C:imp:v1	T	C	0.938126	1.00443	33043	ADD	0.164369	0.015614	110.819	25.1883	NA	6.48e-26	ADAM15	rs822516	0.00334255	110.812
ADAM15_Q13444_OID20109_v1_Cardiometabolic_expo_rt.txt	chr1	155964018	1:155933809:G:A:imp:v1	G	A	0.0213725	0.948772	33043	ADD	-0.486566	0.0267529	330.781	73.1874	NA	6.5e-74	ADAM15	rs181765463	0.00991143	330.762
ADAM15_Q13444_OID20109_v1_Cardiometabolic_expo_rt.txt	chr1	155976224	1:155946015:C:G:imp:v1	C	G	0.0110248	0.904431	33043	ADD	0.238906	0.0379479	39.6349	9.51404	NA	3.06e-10	ADAM15	rs114516591	0.00119806	39.6326
ADAM15_Q13444_OID20109_v1_Cardiometabolic_expo_rt.txt	chr1	155985154	1:155954945:CA:C:imp:v1	CA	C	0.0408596	0.704909	33043	ADD	-0.282315	0.0226863	154.861	34.8234	NA	1.5e-35	ADAM15	rs76780695	0.00466477	154.851
ADAM15_Q13444_OID20109_v1_Cardiometabolic_expo_rt.txt	chr1	155992792	1:155962583:T:C:imp:v1	T	C	0.0164816	0.872078	33043	ADD	-0.190952	0.0317209	36.2376	8.75778	NA	1.75e-09	ADAM15	rs112315110	0.00109547	36.2352
ADAM15_Q13444_OID20109_v1_Cardiometabolic_expo_rt.txt	chr1	156000687	1:155970478:G:GT:imp:v1	G	GT	0.817095	0.759939	33043	ADD	-0.238136	0.0111889	452.977	99.7899	NA	1.62e-100	ADAM15	rs201762150	0.0135233	452.949
ADAM15_Q13444_OID20109_v1_Cardiometabolic_expo_rt.txt	chr1	156014716	1:155984507:A:G:imp:v1	A	G	0.0303404	0.966515	33043	ADD	-0.200202	0.0223548	80.2042	18.4715	NA	3.38e-19	ADAM15	rs12119565	0.00242138	80.199
ADAM15_Q13444_OID20109_v1_Cardiometabolic_expo_rt.txt	chr1	156018600	1:155988391:C:T:imp:v1	C	T	0.0923701	0.984618	33043	ADD	-0.359805	0.0131214	751.931	164.816	NA	1.53e-165	ADAM15	rs141206156	0.0222496	751.879
ADAM15_Q13444_OID20109_v1_Cardiometabolic_expo_rt.txt	chr1	156021787	1:155991578:A:G:imp:v1	A	G	0.0552872	0.966347	33043	ADD	-0.313605	0.0167851	349.075	77.1715	NA	6.74e-78	ADAM15	rs79271479	0.0104538	349.053
ADAM15_Q13444_OID20109_v1_Cardiometabolic_expo_rt.txt	chr1	156034296	1:156004087:C:CTT:imp:v1	C	CTT	0.739617	0.868218	33043	ADD	-0.16759	0.00921867	330.493	73.1246	NA	7.51e-74	ADAM15	rs114287498	0.0099028	330.471
ADAM15_Q13444_OID20109_v1_Cardiometabolic_expo_rt.txt	chr1	156046244	1:156016035:T:C:imp:v1	T	C	0.534986	1.0115	33043	ADD	0.238273	0.00751592	1005.05	219.843	NA	1.44e-220	ADAM15	rs12136348	0.0295184	1004.98
ADAM22_Q9P0K1_OID21001_v1_Neurology_expo_rt.txt	chr7	86943161	7:86572477:A:C:imp:v1	A	C	0.0453852	0.999398	33436	ADD	-0.149548	0.0181565	67.8417	15.7516	NA	1.77e-16	ADAM22	rs78621498	0.00202489	67.8377
ADAM22_Q9P0K1_OID21001_v1_Neurology_expo_rt.txt	chr7	86978267	7:86607583:A:G:imp:v1	A	G	0.232562	0.969841	33436	ADD	0.0614205	0.00908021	45.7547	10.8728	NA	1.34e-11	ADAM22	rs9719800	0.00136655	45.7519
ADAM22_Q9P0K1_OID21001_v1_Neurology_expo_rt.txt	chr7	86982253	7:86611569:G:A:imp:v1	G	A	0.0254054	0.964687	33436	ADD	0.19766	0.0244476	65.3681	15.2067	NA	6.21e-16	ADAM22	rs71562734	0.0019512	65.3641
ADAM22_Q9P0K1_OID21001_v1_Neurology_expo_rt.txt	chr7	87079136	7:86708452:T:G:imp:v1	T	G	0.0167124	0.904114	33436	ADD	0.206949	0.0309846	44.6102	10.619	NA	2.4e-11	ADAM22	rs150424562	0.00133242	44.6076
ADAM22_Q9P0K1_OID21001_v1_Neurology_expo_rt.txt	chr7	87084647	7:86713963:C:T:imp:v1	C	T	0.208458	1.0078	33436	ADD	0.14284	0.00926247	237.82	52.9299	NA	1.18e-53	ADAM22	rs13236712	0.00706242	237.805
ADAM22_Q9P0K1_OID21001_v1_Neurology_expo_rt.txt	chr7	87093334	7:86722650:G:GA:imp:v1	G	GA	0.846633	0.938295	33436	ADD	0.0775092	0.0108281	51.2394	12.0874	NA	8.18e-13	ADAM22	rs112819951	0.00153011	51.2361
ADAM22_Q9P0K1_OID21001_v1_Neurology_expo_rt.txt	chr7	87096599	7:86725915:C:T:imp:v1	C	T	0.113308	1.00088	33436	ADD	-0.11905	0.0119073	99.9628	22.8089	NA	1.55e-23	ADAM22	rs35784956	0.00298072	99.9554
ADAM22_Q9P0K1_OID21001_v1_Neurology_expo_rt.txt	chr7	87115320	7:86744636:G:A:imp:v1	G	A	0.0197101	0.882099	33436	ADD	-0.185907	0.0289264	41.3049	9.88526	NA	1.3e-10	ADAM22	rs117731852	0.00123382	41.3025
ADAM22_Q9P0K1_OID21001_v1_Neurology_expo_rt.txt	chr7	87132671	7:86761987:G:T:imp:v1	G	T	0.0166968	0.922932	33436	ADD	0.199116	0.030692	42.0884	10.0593	NA	8.72e-11	ADAM22	rs139672552	0.00125719	42.0858
ADAM22_Q9P0K1_OID21001_v1_Neurology_expo_rt.txt	chr7	87138373	7:86767689:T:C:imp:v1	T	C	0.813087	0.995837	33436	ADD	-0.0746952	0.00970467	59.2411	13.8555	NA	1.39e-14	ADAM22	rs7812191	0.00176864	59.2377
ADAM22_Q9P0K1_OID21001_v1_Neurology_expo_rt.txt	chr7	87166924	7:86796240:G:A:imp:v1	G	A	0.0198496	0.868119	33436	ADD	-0.190765	0.029072	43.0577	10.2745	NA	5.31e-11	ADAM22	rs111319184	0.0012861	43.0548
ADAM22_Q9P0K1_OID21001_v1_Neurology_expo_rt.txt	chr7	87209831	7:86839147:T:A:imp:v1	T	A	0.037557	0.938699	33436	ADD	0.183999	0.0205089	80.4913	18.5346	NA	2.92e-19	ADAM22	rs374685635	0.00240153	80.486
ADAM22_Q9P0K1_OID21001_v1_Neurology_expo_rt.txt	chr7	87211930	7:86841246:C:T:imp:v1	C	T	0.0156568	0.999619	33436	ADD	-0.175638	0.0304273	33.3204	8.10701	NA	7.82e-09	ADAM22	rs117208713	0.00099555	33.3184
ADAM22_Q9P0K1_OID21001_v1_Neurology_expo_rt.txt	chr7	87248197	7:86877513:C:T:imp:v1	C	T	0.0286983	0.948135	33436	ADD	-0.192506	0.0232262	68.6959	15.9398	NA	1.15e-16	ADAM22	rs143939037	0.00205034	68.692
ADAM22_Q9P0K1_OID21001_v1_Neurology_expo_rt.txt	chr7	87264793	7:86894109:G:A:imp:v1	G	A	0.0138058	0.834987	33436	ADD	0.258435	0.0354213	53.2322	12.5282	NA	2.96e-13	ADAM22	rs138229125	0.00158953	53.2289
ADAM22_Q9P0K1_OID21001_v1_Neurology_expo_rt.txt	chr7	87351324	7:86980640:A:G:imp:v1	A	G	0.0450683	0.920212	33436	ADD	0.297673	0.0189799	245.976	54.7083	NA	1.96e-55	ADAM22	rs34616897	0.00730287	245.96
ADAM22_Q9P0K1_OID21001_v1_Neurology_expo_rt.txt	chr7	87365459	7:86994775:C:T:imp:v1	C	T	0.104597	0.994142	33436	ADD	-0.122456	0.0123755	97.9123	22.3592	NA	4.37e-23	ADAM22	rs112854881	0.00291978	97.9059
ADAM22_Q9P0K1_OID21001_v1_Neurology_expo_rt.txt	chr7	87400371	7:87029687:G:A:imp:v1	G	A	0.859478	1.01802	33436	ADD	-0.0834043	0.0107692	59.9808	14.0187	NA	9.58e-15	ADAM22	rs31652	0.00179068	59.9769
ADAM22_Q9P0K1_OID21001_v1_Neurology_expo_rt.txt	chr7	87408413	7:87037729:G:C:imp:v1	G	C	0.044306	0.913404	33436	ADD	-0.303342	0.0192092	249.37	55.4482	NA	3.56e-56	ADAM22	rs45526441	0.00740296	249.356
ADAM22_Q9P0K1_OID21001_v1_Neurology_expo_rt.txt	chr7	87440831	7:87070147:C:G:imp:v1	C	G	0.0172128	0.942685	33436	ADD	0.205142	0.029905	47.0568	11.1614	NA	6.9e-12	ADAM22	rs45487294	0.00140539	47.0539
ADAM22_Q9P0K1_OID21001_v1_Neurology_expo_rt.txt	chr7	87448663	7:87077979:T:C:imp:v1	T	C	0.0101537	1.0076	33436	ADD	0.241407	0.0375219	41.3932	9.90487	NA	1.24e-10	ADAM22	rs78253146	0.00123646	41.3908
ADAM22_Q9P0K1_OID21001_v1_Neurology_expo_rt.txt	chr7	87454653	7:87083969:G:A:imp:v1	G	A	0.0368125	0.940344	33436	ADD	0.197439	0.0206871	91.0894	20.8623	NA	1.37e-21	ADAM22	rs45626341	0.00271688	91.0837
ADAM22_Q9P0K1_OID21001_v1_Neurology_expo_rt.txt	chr7	87462276	7:87091592:C:T:imp:v1	C	T	0.024016	1.00602	33436	ADD	-0.197524	0.0245935	64.5062	15.0167	NA	9.62e-16	ADAM22	rs45583842	0.00192552	64.502
ADAM22_Q9P0K1_OID21001_v1_Neurology_expo_rt.txt	chr7	87468788	7:87098104:A:G:imp:v1	A	G	0.441975	1.00545	33436	ADD	-0.0894208	0.00759638	138.568	31.2617	NA	5.47e-32	ADAM22	rs6959217	0.00412718	138.56
ADAM22_Q9P0K1_OID21001_v1_Neurology_expo_rt.txt	chr7	87509195	7:87138511:G:A:imp:v1	G	A	0.453777	1.00327	33436	ADD	-0.297982	0.00757417	1547.78	337.789	NA	0	ADAM22	rs2235048	0.0442429	1547.69
ADAM22_Q9P0K1_OID21001_v1_Neurology_expo_rt.txt	chr7	87515817	7:87145133:G:A:imp:v1	G	A	0.0138704	0.84667	33436	ADD	-0.2468	0.0350934	49.4584	11.6933	NA	2.03e-12	ADAM22	rs137933888	0.00147701	49.4554
ADAM22_Q9P0K1_OID21001_v1_Neurology_expo_rt.txt	chr7	87539433	7:87168749:C:T:imp:v1	C	T	0.952537	0.991965	33436	ADD	-0.231828	0.0178372	168.919	37.8948	NA	1.27e-38	ADAM22	rs4728699	0.00502661	168.909
ADAM22_Q9P0K1_OID21001_v1_Neurology_expo_rt.txt	chr7	87560142	7:87189458:C:T:imp:v1	C	T	0.0197782	0.937707	33436	ADD	-0.172914	0.0280146	38.0972	9.17194	NA	6.73e-10	ADAM22	rs73198396	0.00113811	38.0948
ADAM22_Q9P0K1_OID21001_v1_Neurology_expo_rt.txt	chr7	87568035	7:87197351:A:G:imp:v1	A	G	0.6361	0.989506	33436	ADD	0.31032	0.00789411	1545.3	337.25	NA	0	ADAM22	rs1202166	0.0441751	1545.21
ADAM22_Q9P0K1_OID21001_v1_Neurology_expo_rt.txt	chr7	87587874	7:87217190:CA:C:imp:v1	CA	C	0.107122	0.856873	33436	ADD	-0.275231	0.0131899	435.423	95.9694	NA	1.07e-96	ADAM22	rs112249618	0.0128552	435.397
ADAM22_Q9P0K1_OID21001_v1_Neurology_expo_rt.txt	chr7	87647137	7:87276453:G:A:imp:v1	G	A	0.0269687	0.947151	33436	ADD	0.47679	0.023948	396.382	87.4714	NA	3.38e-88	ADAM22	rs80238698	0.0117161	396.36
ADAM22_Q9P0K1_OID21001_v1_Neurology_expo_rt.txt	chr7	87662272	7:87291588:C:T:imp:v1	C	T	0.0708416	0.959204	33436	ADD	0.307048	0.0150284	417.434	92.0539	NA	8.83e-93	ADAM22	rs112421854	0.0123306	417.408
ADAM22_Q9P0K1_OID21001_v1_Neurology_expo_rt.txt	chr7	87719680	7:87348996:A:G:imp:v1	A	G	0.117267	0.980699	33436	ADD	-0.49707	0.0118546	1758.16	383.501	NA	0	ADAM22	rs74491457	0.0499563	1758.07
ADAM22_Q9P0K1_OID21001_v1_Neurology_expo_rt.txt	chr7	87738208	7:87367524:A:T:imp:v1	A	T	0.0232375	0.948263	33436	ADD	-0.204846	0.0257353	63.3577	14.7635	NA	1.72e-15	ADAM22	rs17329472	0.0018913	63.3535
ADAM22_Q9P0K1_OID21001_v1_Neurology_expo_rt.txt	chr7	87759605	7:87388921:T:G:imp:v1	T	G	0.0102658	0.929212	33436	ADD	-0.351717	0.0388826	81.8233	18.8274	NA	1.49e-19	ADAM22	rs141517321	0.00244118	81.8182
ADAM22_Q9P0K1_OID21001_v1_Neurology_expo_rt.txt	chr7	87761506	7:87390822:G:A:imp:v1	G	A	0.0246503	0.992866	33436	ADD	-0.334151	0.0244464	186.834	41.8066	NA	1.56e-42	ADAM22	rs13437893	0.00555676	186.823
ADAM22_Q9P0K1_OID21001_v1_Neurology_expo_rt.txt	chr7	87761845	7:87391161:G:C:imp:v1	G	C	0.246391	0.991706	33436	ADD	-0.279547	0.00880361	1008.3	220.549	NA	2.82e-221	ADAM22	rs35648408	0.0292732	1008.24
ADAM22_Q9P0K1_OID21001_v1_Neurology_expo_rt.txt	chr7	87766439	7:87395755:C:T:imp:v1	C	T	0.0108117	1.00305	33436	ADD	-0.243759	0.0364572	44.7051	10.6401	NA	2.29e-11	ADAM22	rs117502888	0.00133524	44.7022
ADAM22_Q9P0K1_OID21001_v1_Neurology_expo_rt.txt	chr7	87794629	7:87423944:A:C:imp:v1	A	C	0.0165213	0.922341	33436	ADD	-0.287595	0.0308545	86.8812	19.9384	NA	1.15e-20	ADAM22	rs76769672	0.0025917	86.876
ADAM22_Q9P0K1_OID21001_v1_Neurology_expo_rt.txt	chr7	87818998	7:87448313:G:A:imp:v1	G	A	0.01429	0.949144	33436	ADD	-0.264706	0.0326664	65.6635	15.2718	NA	5.35e-16	ADAM22	rs143488828	0.00196001	65.6597
ADAM22_Q9P0K1_OID21001_v1_Neurology_expo_rt.txt	chr7	87819111	7:87448426:C:T:imp:v1	C	T	0.0345524	0.999525	33436	ADD	-0.221803	0.0206952	114.867	26.0749	NA	8.42e-27	ADAM22	rs76609162	0.00342367	114.86
ADAM22_Q9P0K1_OID21001_v1_Neurology_expo_rt.txt	chr7	87827443	7:87456758:C:T:imp:v1	C	T	0.0345725	0.966489	33436	ADD	0.223672	0.0210419	112.994	25.6647	NA	2.16e-26	ADAM22	rs141948691	0.00336801	112.987
ADAM22_Q9P0K1_OID21001_v1_Neurology_expo_rt.txt	chr7	87839324	7:87468639:G:A:imp:v1	G	A	0.0545633	0.980286	33436	ADD	0.263317	0.0167933	245.859	54.6827	NA	2.08e-55	ADAM22	rs111338741	0.00729944	245.844
ADAM22_Q9P0K1_OID21001_v1_Neurology_expo_rt.txt	chr7	87859359	7:87488674:G:A:imp:v1	G	A	0.0986381	0.952928	33436	ADD	0.490612	0.0129811	1428.41	311.85	NA	0	ADAM22	rs2040634	0.0409705	1428.33
ADAM22_Q9P0K1_OID21001_v1_Neurology_expo_rt.txt	chr7	87862998	7:87492313:G:A:imp:v1	G	A	0.0135546	0.982221	33436	ADD	-0.511263	0.0329579	240.641	53.545	NA	2.85e-54	ADAM22	rs141812840	0.00714564	240.627
ADAM22_Q9P0K1_OID21001_v1_Neurology_expo_rt.txt	chr7	87908218	7:87537533:T:C:imp:v1	T	C	0.0566454	0.939051	33436	ADD	0.359774	0.0168756	454.509	100.123	NA	7.53e-101	ADAM22	rs137991524	0.0134111	454.48
ADAM22_Q9P0K1_OID21001_v1_Neurology_expo_rt.txt	chr7	87930625	7:87559940:C:T:imp:v1	C	T	0.0121212	0.934364	33436	ADD	0.296836	0.0357124	69.0868	16.0258	NA	9.42e-17	ADAM22	rs6962599	0.00206198	69.0827
ADAM22_Q9P0K1_OID21001_v1_Neurology_expo_rt.txt	chr7	87936871	7:87566186:T:G:imp:v1	T	G	0.15209	0.831356	33436	ADD	-0.262175	0.0115375	516.369	113.584	NA	2.61e-114	ADAM22	rs6960461	0.0152086	516.337
ADAM22_Q9P0K1_OID21001_v1_Neurology_expo_rt.txt	chr7	87944296	7:87573611:A:G:imp:v1	A	G	0.10886	0.889157	33436	ADD	-0.238306	0.0128591	343.439	75.9441	NA	1.14e-76	ADAM22	rs10952902	0.0101671	343.418
ADAM22_Q9P0K1_OID21001_v1_Neurology_expo_rt.txt	chr7	88030839	7:87660154:G:A:imp:v1	G	A	0.0246601	0.96295	33436	ADD	-0.213764	0.0248126	74.2202	17.1557	NA	6.99e-18	ADAM22	rs145580539	0.00221486	74.2162
ADAM22_Q9P0K1_OID21001_v1_Neurology_expo_rt.txt	chr7	88037373	7:87666688:C:T:imp:v1	C	T	0.021777	0.930562	33436	ADD	-0.432235	0.0268228	259.676	57.695	NA	2.02e-58	ADAM22	rs17254173	0.0077065	259.66
ADAM22_Q9P0K1_OID21001_v1_Neurology_expo_rt.txt	chr7	88037535	7:87666850:A:G:imp:v1	A	G	0.0543212	0.964474	33436	ADD	-0.287016	0.0169696	286.068	63.4466	NA	3.58e-64	ADAM22	rs78184612	0.0084831	286.051
ADAM22_Q9P0K1_OID21001_v1_Neurology_expo_rt.txt	chr7	88044977	7:87674292:G:A:imp:v1	G	A	0.344112	0.972828	33436	ADD	0.0830242	0.00805967	106.114	24.1574	NA	6.96e-25	ADAM22	rs112739903	0.00316362	106.108
ADAM22_Q9P0K1_OID21001_v1_Neurology_expo_rt.txt	chr7	88068353	7:87697668:C:T:imp:v1	C	T	0.0275003	1.00863	33436	ADD	0.139703	0.0229954	36.9089	8.90736	NA	1.24e-09	ADAM22	rs111630261	0.00110265	36.9066
ADAM22_Q9P0K1_OID21001_v1_Neurology_expo_rt.txt	chr7	88069838	7:87699153:G:A:imp:v1	G	A	0.0123859	0.907027	33436	ADD	0.510994	0.0358473	203.198	45.378	NA	4.19e-46	ADAM22	rs114691137	0.0060405	203.186
ADAM22_Q9P0K1_OID21001_v1_Neurology_expo_rt.txt	chr7	88075684	7:87704999:G:A:imp:v1	G	A	0.0192158	1.00262	33436	ADD	0.250123	0.0274812	82.8392	19.0506	NA	8.9e-20	ADAM22	rs111428945	0.00247142	82.8342
ADAM22_Q9P0K1_OID21001_v1_Neurology_expo_rt.txt	chr7	88100063	7:87729378:G:T:imp:v1	G	T	0.0379561	1.00099	33436	ADD	-0.75045	0.0197615	1442.13	314.831	NA	0	ADAM22	rs79663854	0.0413476	1442.04
ADAM22_Q9P0K1_OID21001_v1_Neurology_expo_rt.txt	chr7	88113628	7:87742943:C:T:imp:v1	C	T	0.587091	0.987634	33436	ADD	-0.236863	0.00772253	940.751	205.867	NA	1.36e-206	ADAM22	rs10281274	0.0273659	940.696
ADAM22_Q9P0K1_OID21001_v1_Neurology_expo_rt.txt	chr7	88113664	7:87742979:A:G:imp:v1	A	G	0.089182	0.973261	33436	ADD	-0.167763	0.0134341	155.946	35.0605	NA	8.7e-36	ADAM22	rs193163017	0.00464237	155.937
ADAM22_Q9P0K1_OID21001_v1_Neurology_expo_rt.txt	chr7	88192252	7:87821567:G:A:imp:v1	G	A	0.11657	0.883443	33436	ADD	0.106056	0.0125315	71.6244	16.5845	NA	2.6e-17	ADAM22	rs78913740	0.00213757	71.6207
ADAM22_Q9P0K1_OID21001_v1_Neurology_expo_rt.txt	chr7	88198889	7:87828204:C:A:imp:v1	C	A	0.319737	1.00154	33436	ADD	-0.0501403	0.00809288	38.3855	9.23611	NA	5.81e-10	ADAM22	rs10268218	0.00114671	38.3832
ADAM22_Q9P0K1_OID21001_v1_Neurology_expo_rt.txt	chr7	88255617	7:87884932:A:G:imp:v1	A	G	0.130108	0.972026	33436	ADD	0.0691225	0.0113832	36.8731	8.89938	NA	1.26e-09	ADAM22	rs77228087	0.00110158	36.8709
ADAM22_Q9P0K1_OID21001_v1_Neurology_expo_rt.txt	chr7	88348937	7:87978252:G:A:imp:v1	G	A	0.0161802	0.998584	33436	ADD	0.201435	0.029958	45.2111	10.7523	NA	1.77e-11	ADAM22	rs117165573	0.00135034	45.2083
ADAM22_Q9P0K1_OID21001_v1_Neurology_expo_rt.txt	chr7	88372347	7:88001662:G:A:imp:v1	G	A	0.0449643	0.94431	33436	ADD	-0.236925	0.0187645	159.422	35.8202	NA	1.51e-36	ADAM22	rs140741035	0.00474534	159.412
ADAM22_Q9P0K1_OID21001_v1_Neurology_expo_rt.txt	chr7	88397770	7:88027085:T:C:imp:v1	T	C	0.0533122	0.974753	33436	ADD	0.189829	0.0170249	124.323	28.1452	NA	7.16e-29	ADAM22	rs76500615	0.0037045	124.317
ADAM22_Q9P0K1_OID21001_v1_Neurology_expo_rt.txt	chr7	88434230	7:88063545:C:A:imp:v1	C	A	0.471609	0.992901	33436	ADD	-0.0765681	0.0075967	101.589	23.1654	NA	6.83e-24	ADAM22	rs11761151	0.0030291	101.583
ADAM22_Q9P0K1_OID21001_v1_Neurology_expo_rt.txt	chr7	88461635	7:88090950:A:G:imp:v1	A	G	0.603535	0.994859	33436	ADD	-0.0720555	0.0077407	86.6511	19.8879	NA	1.29e-20	ADAM22	rs7801811	0.00258485	86.6459
ADAM22_Q9P0K1_OID21001_v1_Neurology_expo_rt.txt	chr7	88528957	7:88158272:C:T:imp:v1	C	T	0.0419907	0.994086	33436	ADD	-0.112347	0.0188879	35.3795	8.5665	NA	2.71e-09	ADAM22	rs35213026	0.00105702	35.3777
ADAM22_Q9P0K1_OID21001_v1_Neurology_expo_rt.txt	chr7	88573784	7:88203099:G:A:imp:v1	G	A	0.306446	0.993673	33436	ADD	-0.0583464	0.00822198	50.3589	11.8926	NA	1.28e-12	ADAM22	rs28691655	0.00150386	50.3558
ADAM22_Q9P0K1_OID21001_v1_Neurology_expo_rt.txt	chr7	88575783	7:88205098:T:C:imp:v1	T	C	0.176329	0.97251	33436	ADD	-0.0974472	0.0100555	93.914	21.4821	NA	3.3e-22	ADAM22	rs2718316	0.00280091	93.9086
ADAM22_Q9P0K1_OID21001_v1_Neurology_expo_rt.txt	chr7	88629564	7:88258878:A:G:imp:v1	A	G	0.0236893	0.950407	33436	ADD	0.15585	0.0254744	37.4289	9.02317	NA	9.48e-10	ADAM22	rs117055675	0.00111816	37.4265
ADAM22_Q9P0K1_OID21001_v1_Neurology_expo_rt.txt	chr7	88681224	7:88310538:C:G:imp:v1	C	G	0.315177	0.95716	33436	ADD	0.0521905	0.00830822	39.4608	9.47533	NA	3.35e-10	ADAM22	rs56331939	0.0011788	39.4585
ADAM22_Q9P0K1_OID21001_v1_Neurology_expo_rt.txt	chr7	88693266	7:88322580:A:G:imp:v1	A	G	0.189961	0.99186	33436	ADD	-0.103515	0.00966849	114.629	26.0227	NA	9.49e-27	ADAM22	rs2538892	0.00341656	114.621
ADAM22_Q9P0K1_OID21001_v1_Neurology_expo_rt.txt	chr7	88699857	7:88329171:A:G:imp:v1	A	G	0.0183893	0.924083	33436	ADD	-0.204196	0.0292402	48.7682	11.5405	NA	2.88e-12	ADAM22	rs137920150	0.00145642	48.765
ADAM22_Q9P0K1_OID21001_v1_Neurology_expo_rt.txt	chr7	88704726	7:88334040:T:C:imp:v1	T	C	0.850179	0.992718	33436	ADD	-0.0823583	0.0106229	60.108	14.0468	NA	8.98e-15	ADAM22	rs6415322	0.00179446	60.1039
ADAM22_Q9P0K1_OID21001_v1_Neurology_expo_rt.txt	chr7	89180081	7:88809395:G:C:imp:v1	G	C	0.210192	1.00687	33436	ADD	-0.0616802	0.00923755	44.5838	10.6132	NA	2.44e-11	ADAM22	rs2106939	0.00133163	44.5812
ADAM23_O75077_OID20651_v1_Inflammation_expo_rt.txt	chr2	205823569	2:206688293:T:C:imp:v1	T	C	0.102022	0.964858	34049	ADD	0.0918164	0.0126502	52.6803	12.4061	NA	3.93e-13	ADAM23	rs10188991	0.00154479	52.6769
ADAM23_O75077_OID20651_v1_Inflammation_expo_rt.txt	chr2	205897501	2:206762225:C:CTT:imp:v1	C	CTT	0.965503	0.7407	34049	ADD	-0.14581	0.0239482	37.0702	8.94329	NA	1.14e-09	ADAM23	rs370620584	0.00108756	37.0684
ADAM23_O75077_OID20651_v1_Inflammation_expo_rt.txt	chr2	205907626	2:206772350:G:A:imp:v1	G	A	0.0117453	0.92542	34049	ADD	0.331708	0.0362836	83.5779	19.2129	NA	6.12e-20	ADAM23	rs146937248	0.00244862	83.5729
ADAM23_O75077_OID20651_v1_Inflammation_expo_rt.txt	chr2	205936640	2:206801364:C:A:imp:v1	C	A	0.243164	0.995806	34049	ADD	0.0988858	0.00879044	126.546	28.6316	NA	2.34e-29	ADAM23	rs13409398	0.00370281	126.538
ADAM23_O75077_OID20651_v1_Inflammation_expo_rt.txt	chr2	205940007	2:206804731:T:G:imp:v1	T	G	0.212401	0.787002	34049	ADD	-0.101969	0.0103732	96.629	22.0777	NA	8.36e-23	ADAM23	rs58038240	0.00282993	96.6241
ADAM23_O75077_OID20651_v1_Inflammation_expo_rt.txt	chr2	205940386	2:206805110:G:A:imp:v1	G	A	0.171114	0.935757	34049	ADD	0.122835	0.0103254	141.525	31.9083	NA	1.24e-32	ADAM23	rs78395156	0.00413928	141.516
ADAM23_O75077_OID20651_v1_Inflammation_expo_rt.txt	chr2	205944266	2:206808990:C:T:imp:v1	C	T	0.676596	0.99759	34049	ADD	-0.131025	0.00805291	264.728	58.796	NA	1.6e-59	ADAM23	rs6709520	0.00771498	264.714
ADAM23_O75077_OID20651_v1_Inflammation_expo_rt.txt	chr2	205952942	2:206817666:C:G:imp:v1	C	G	0.107199	0.970691	34049	ADD	-0.11262	0.01234	83.2904	19.1497	NA	7.08e-20	ADAM23	rs1808328	0.00244026	83.2866
ADAM23_O75077_OID20651_v1_Inflammation_expo_rt.txt	chr2	205956566	2:206821290:G:T:imp:v1	G	T	0.289891	1.00194	34049	ADD	0.0919283	0.00828391	123.148	27.888	NA	1.29e-28	ADAM23	rs7566893	0.00360376	123.141
ADAM23_O75077_OID20651_v1_Inflammation_expo_rt.txt	chr2	205958047	2:206822771:C:T:imp:v1	C	T	0.533266	0.981897	34049	ADD	-0.15269	0.00761249	402.316	88.7632	NA	1.73e-89	ADAM23	rs10179924	0.0116778	402.293
ADAM23_O75077_OID20651_v1_Inflammation_expo_rt.txt	chr2	205959376	2:206824100:A:G:imp:v1	A	G	0.18147	0.998693	34049	ADD	-0.0629177	0.00976715	41.4964	9.92779	NA	1.18e-10	ADAM23	rs10207175	0.00121724	41.4939
ADAM23_O75077_OID20651_v1_Inflammation_expo_rt.txt	chr2	205960728	2:206825452:G:A:imp:v1	G	A	0.0256102	1.00079	34049	ADD	0.377391	0.0238029	251.377	55.8857	NA	1.3e-56	ADAM23	rs114601655	0.00732866	251.361
ADAM23_O75077_OID20651_v1_Inflammation_expo_rt.txt	chr2	205963442	2:206828166:C:T:imp:v1	C	T	0.0306757	0.983074	34049	ADD	0.257974	0.0219922	137.599	31.0497	NA	8.92e-32	ADAM23	rs74411522	0.00402493	137.591
ADAM23_O75077_OID20651_v1_Inflammation_expo_rt.txt	chr2	205991139	2:206855863:C:CA:imp:v1	C	CA	0.38214	0.994455	34049	ADD	0.126915	0.00775938	267.53	59.4068	NA	3.92e-60	ADAM23	rs376612591	0.00779594	267.514
ADAM23_O75077_OID20651_v1_Inflammation_expo_rt.txt	chr2	206002056	2:206866780:C:T:imp:v1	C	T	0.33704	1.00132	34049	ADD	-0.0583057	0.00795237	53.7562	12.644	NA	2.27e-13	ADAM23	rs4675582	0.0015763	53.7531
ADAM23_O75077_OID20651_v1_Inflammation_expo_rt.txt	chr2	206006262	2:206870986:G:C:imp:v1	G	C	0.0125453	0.960286	34049	ADD	0.202256	0.0344742	34.4203	8.35254	NA	4.44e-09	ADAM23	rs13022097	0.00100988	34.4183
ADAM23_O75077_OID20651_v1_Inflammation_expo_rt.txt	chr2	206063668	2:206928392:T:C:imp:v1	T	C	0.114877	0.99492	34049	ADD	-0.156039	0.0118242	174.15	39.0371	NA	9.18e-40	ADAM23	rs62195367	0.00508865	174.139
ADAM23_O75077_OID20651_v1_Inflammation_expo_rt.txt	chr2	206078520	2:206943244:G:A:imp:v1	G	A	0.0169724	0.956411	34049	ADD	0.163497	0.0297701	30.1621	7.40076	NA	3.97e-08	ADAM23	rs142140351	0.000885055	30.1601
ADAM23_O75077_OID20651_v1_Inflammation_expo_rt.txt	chr2	206091862	2:206956586:C:T:imp:v1	C	T	0.0443966	0.987913	34049	ADD	-0.40304	0.0183695	481.394	105.974	NA	1.06e-106	ADAM23	rs191343078	0.0139412	481.367
ADAM23_O75077_OID20651_v1_Inflammation_expo_rt.txt	chr2	206093036	2:206957760:G:A:imp:v1	G	A	0.0104618	0.945844	34049	ADD	0.632676	0.0380138	277.001	61.4708	NA	3.38e-62	ADAM23	rs76841523	0.00806969	276.984
ADAM23_O75077_OID20651_v1_Inflammation_expo_rt.txt	chr2	206123040	2:206987764:T:C:imp:v1	T	C	0.0410946	0.962268	34049	ADD	-0.203496	0.0193115	111.04	25.2366	NA	5.8e-26	ADAM23	rs141157454	0.00325058	111.034
ADAM23_O75077_OID20651_v1_Inflammation_expo_rt.txt	chr2	206132247	2:206996971:T:A:imp:v1	T	A	0.0204349	0.977699	34049	ADD	-0.168854	0.026878	39.4668	9.47666	NA	3.34e-10	ADAM23	rs148934517	0.00115777	39.4642
ADAM23_O75077_OID20651_v1_Inflammation_expo_rt.txt	chr2	206164706	2:207029430:C:T:imp:v1	C	T	0.117634	1.00051	34049	ADD	-0.17464	0.0116696	223.961	49.9075	NA	1.24e-50	ADAM23	rs79384664	0.00653467	223.949
ADAM23_O75077_OID20651_v1_Inflammation_expo_rt.txt	chr2	206201750	2:207066474:G:C:imp:v1	G	C	0.0574239	0.980034	34049	ADD	-0.25363	0.0163309	241.201	53.6671	NA	2.15e-54	ADAM23	rs115319174	0.00703414	241.188
ADAM23_O75077_OID20651_v1_Inflammation_expo_rt.txt	chr2	206209652	2:207074376:T:C:imp:v1	T	C	0.655432	0.832724	34049	ADD	0.145474	0.00867197	281.407	62.431	NA	3.71e-63	ADAM23	rs76274582	0.00819703	281.391
ADAM23_O75077_OID20651_v1_Inflammation_expo_rt.txt	chr2	206219914	2:207084638:TA:T:imp:v1	TA	T	0.340329	0.988764	34049	ADD	0.236285	0.00798045	876.633	191.928	NA	1.18e-192	ADAM23	rs184124935	0.0251	876.581
ADAM23_O75077_OID20651_v1_Inflammation_expo_rt.txt	chr2	206224158	2:207088882:A:G:imp:v1	A	G	0.315592	0.994224	34049	ADD	0.242508	0.00811438	893.185	195.527	NA	2.97e-196	ADAM23	rs34549239	0.0255618	893.133
ADAM23_O75077_OID20651_v1_Inflammation_expo_rt.txt	chr2	206231599	2:207096323:A:G:imp:v1	A	G	0.0240378	0.888602	34049	ADD	0.53254	0.0260405	418.223	92.2257	NA	5.95e-93	ADAM23	rs113165556	0.0121339	418.196
ADAM23_O75077_OID20651_v1_Inflammation_expo_rt.txt	chr2	206272094	2:207136818:T:A:imp:v1	T	A	0.411177	0.990768	34049	ADD	0.302088	0.00767685	1548.46	337.937	NA	0	ADAM23	rs117203002	0.0434993	1548.37
ADAM23_O75077_OID20651_v1_Inflammation_expo_rt.txt	chr2	206278337	2:207143061:A:G:imp:v1	A	G	0.0132163	0.817833	34049	ADD	-0.272176	0.0364258	55.8317	13.1027	NA	7.89e-14	ADAM23	rs142275419	0.00163706	55.8285
ADAM23_O75077_OID20651_v1_Inflammation_expo_rt.txt	chr2	206287554	2:207152278:T:G:imp:v1	T	G	0.0235111	0.981606	34049	ADD	-0.19003	0.0250497	57.549	13.4819	NA	3.3e-14	ADAM23	rs114051435	0.00168734	57.5458
ADAM23_O75077_OID20651_v1_Inflammation_expo_rt.txt	chr2	206303444	2:207168168:T:C:imp:v1	T	C	0.0412787	0.997019	34049	ADD	-0.453507	0.0189423	573.193	125.945	NA	1.14e-126	ADAM23	rs114356618	0.0165557	573.162
ADAM23_O75077_OID20651_v1_Inflammation_expo_rt.txt	chr2	206350900	2:207215624:T:C:imp:v1	T	C	0.0290633	0.969749	34049	ADD	0.319754	0.0227383	197.75	44.1892	NA	6.47e-45	ADAM23	rs138059385	0.00577426	197.738
ADAM23_O75077_OID20651_v1_Inflammation_expo_rt.txt	chr2	206363126	2:207227850:C:T:imp:v1	C	T	0.0294134	0.978334	34049	ADD	0.314385	0.0225073	195.11	43.6129	NA	2.44e-44	ADAM23	rs138360124	0.00569759	195.097
ADAM23_O75077_OID20651_v1_Inflammation_expo_rt.txt	chr2	206388325	2:207253049:G:A:imp:v1	G	A	0.0440395	0.998579	34049	ADD	0.503384	0.0183433	753.082	165.067	NA	8.57e-166	ADAM23	rs76275244	0.0216391	753.041
ADAM23_O75077_OID20651_v1_Inflammation_expo_rt.txt	chr2	206412401	2:207277125:G:A:imp:v1	G	A	0.0547346	0.976934	34049	ADD	0.33202	0.0167324	393.742	86.8968	NA	1.27e-87	ADAM23	rs151053679	0.0114318	393.719
ADAM23_O75077_OID20651_v1_Inflammation_expo_rt.txt	chr2	206432328	2:207297052:A:T:imp:v1	A	T	0.222107	0.972115	34049	ADD	-0.267151	0.00917964	846.96	185.478	NA	3.33e-186	ADAM23	rs2029088	0.024271	846.909
ADAM23_O75077_OID20651_v1_Inflammation_expo_rt.txt	chr2	206435241	2:207299965:C:T:imp:v1	C	T	0.0110282	0.99962	34049	ADD	-0.228261	0.0360302	40.1357	9.6254	NA	2.37e-10	ADAM23	rs116808077	0.00117737	40.1333
ADAM23_O75077_OID20651_v1_Inflammation_expo_rt.txt	chr2	206444237	2:207308961:A:G:imp:v1	A	G	0.09548	0.999182	34049	ADD	0.906738	0.0128061	5013.39	1090.59	NA	0	ADAM23	rs1448903	0.128343	5013.08
ADAM23_O75077_OID20651_v1_Inflammation_expo_rt.txt	chr2	206448479	2:207313203:G:C:imp:v1	G	C	0.68457	0.990641	34049	ADD	0.477269	0.00813232	3444.28	749.782	NA	0	ADAM23	rs1207146	0.0918638	3444.07
ADAM23_O75077_OID20651_v1_Inflammation_expo_rt.txt	chr2	206458174	2:207322898:T:G:imp:v1	T	G	0.0262178	0.947976	34049	ADD	-1.02161	0.0241848	1784.37	389.195	NA	0	ADAM23	rs139001108	0.0497964	1784.27
ADAM23_O75077_OID20651_v1_Inflammation_expo_rt.txt	chr2	206458207	2:207322931:G:A:imp:v1	G	A	0.0150493	0.951316	34049	ADD	-0.18671	0.0316853	34.7234	8.42019	NA	3.8e-09	ADAM23	rs10932152	0.00101876	34.7211
ADAM23_O75077_OID20651_v1_Inflammation_expo_rt.txt	chr2	206511328	2:207376052:G:A:imp:v1	G	A	0.0245734	0.970498	34049	ADD	-1.05928	0.0246619	1844.88	402.342	NA	0	ADAM23	rs140087889	0.0513982	1844.77
ADAM23_O75077_OID20651_v1_Inflammation_expo_rt.txt	chr2	206527534	2:207392258:A:C:imp:v1	A	C	0.0230337	0.971638	34049	ADD	-0.987712	0.025431	1508.46	329.245	NA	0	ADAM23	rs143219430	0.0424232	1508.37
ADAM23_O75077_OID20651_v1_Inflammation_expo_rt.txt	chr2	206564144	2:207428868:C:A:imp:v1	C	A	0.397489	1.00223	34049	ADD	0.337803	0.0076763	1936.53	422.253	NA	0	ADAM23	rs759844	0.053814	1936.41
ADAM23_O75077_OID20651_v1_Inflammation_expo_rt.txt	chr2	206571445	2:207436169:G:A:imp:v1	G	A	0.47608	1.00223	34049	ADD	-0.395308	0.00752249	2761.52	601.474	NA	0	ADAM23	rs1963365	0.0750198	2761.36
ADAM23_O75077_OID20651_v1_Inflammation_expo_rt.txt	chr2	206580474	2:207445198:T:C:imp:v1	T	C	0.0156215	0.977218	34049	ADD	0.321203	0.0306819	109.596	24.9204	NA	1.2e-25	ADAM23	rs145839982	0.00320845	109.59
ADAM23_O75077_OID20651_v1_Inflammation_expo_rt.txt	chr2	206588586	2:207453310:C:T:imp:v1	C	T	0.0978285	0.9999	34049	ADD	0.245808	0.0126623	376.847	83.2187	NA	6.04e-84	ADAM23	rs3821170	0.0109467	376.826
ADAM23_O75077_OID20651_v1_Inflammation_expo_rt.txt	chr2	206675692	2:207540416:T:C:imp:v1	T	C	0.0403216	0.988007	34049	ADD	0.638313	0.019233	1101.48	240.802	NA	1.58e-241	ADAM23	rs79260146	0.0313359	1101.41
ADAM23_O75077_OID20651_v1_Inflammation_expo_rt.txt	chr2	206677594	2:207542318:G:C:imp:v1	G	C	0.295491	0.993661	34049	ADD	0.280268	0.00826805	1149.06	251.143	NA	7.19e-252	ADAM23	rs11900199	0.0326454	1148.99
ADAM23_O75077_OID20651_v1_Inflammation_expo_rt.txt	chr2	206688332	2:207553056:T:C:imp:v1	T	C	0.478089	0.991308	34049	ADD	0.157791	0.00756492	435.065	95.8916	NA	1.28e-96	ADAM23	rs6737090	0.0126165	435.041
ADAM23_O75077_OID20651_v1_Inflammation_expo_rt.txt	chr2	206709839	2:207574563:G:T:imp:v1	G	T	0.0879137	0.996251	34049	ADD	0.143764	0.0133105	116.657	26.4669	NA	3.41e-27	ADAM23	rs77861227	0.00341446	116.65
ADAM23_O75077_OID20651_v1_Inflammation_expo_rt.txt	chr2	206712557	2:207577281:T:C:imp:v1	T	C	0.591912	0.996913	34049	ADD	0.106696	0.00766834	193.595	43.2823	NA	5.22e-44	ADAM23	rs12052769	0.00565362	193.583
ADAM23_O75077_OID20651_v1_Inflammation_expo_rt.txt	chr2	206722116	2:207586840:G:A:imp:v1	G	A	0.0147435	0.997167	34049	ADD	-0.17185	0.0312411	30.2586	7.42238	NA	3.78e-08	ADAM23	rs111368644	0.000887884	30.2567
ADAM23_O75077_OID20651_v1_Inflammation_expo_rt.txt	chr2	206725950	2:207590674:A:T:imp:v1	A	T	0.0961823	1.00501	34049	ADD	0.171875	0.0127253	182.426	40.8444	NA	1.43e-41	ADAM23	rs115783504	0.00532923	182.416
ADAM23_O75077_OID20651_v1_Inflammation_expo_rt.txt	chr2	206726719	2:207591443:A:G:imp:v1	A	G	0.0190491	0.990453	34049	ADD	-0.651248	0.0276577	554.447	121.867	NA	1.36e-122	ADAM23	rs148565219	0.0160229	554.415
ADAM23_O75077_OID20651_v1_Inflammation_expo_rt.txt	chr2	206742916	2:207607640:C:T:imp:v1	C	T	0.140139	0.928461	34049	ADD	0.0918059	0.0112466	66.6344	15.4857	NA	3.27e-16	ADAM23	rs13019530	0.00195319	66.6305
ADAM23_O75077_OID20651_v1_Inflammation_expo_rt.txt	chr2	206753868	2:207618592:C:T:imp:v1	C	T	0.509825	0.998495	34049	ADD	-0.124867	0.00753146	274.875	61.0075	NA	9.83e-62	ADAM23	rs7591658	0.00800831	274.86
ADAM23_O75077_OID20651_v1_Inflammation_expo_rt.txt	chr2	206764159	2:207628883:A:G:imp:v1	A	G	0.0181737	0.987281	34049	ADD	0.316324	0.0283376	124.606	28.207	NA	6.21e-29	ADAM23	rs188670311	0.00364626	124.598
ADAM23_O75077_OID20651_v1_Inflammation_expo_rt.txt	chr2	206780792	2:207645516:C:T:imp:v1	C	T	0.0315575	1.00105	34049	ADD	0.421691	0.021511	384.298	84.8407	NA	1.44e-85	ADAM23	rs72959512	0.0111606	384.275
ADAM23_O75077_OID20651_v1_Inflammation_expo_rt.txt	chr2	206805827	2:207670551:G:A:imp:v1	G	A	0.022314	0.933477	34049	ADD	-0.144015	0.026356	29.8578	7.33261	NA	4.65e-08	ADAM23	rs13432718	0.000876136	29.856
ADAM23_O75077_OID20651_v1_Inflammation_expo_rt.txt	chr2	206808031	2:207672755:C:T:imp:v1	C	T	0.166583	0.999302	34049	ADD	0.0720208	0.0101008	50.8402	11.9991	NA	1e-12	ADAM23	rs12476420	0.00149091	50.8369
ADAM23_O75077_OID20651_v1_Inflammation_expo_rt.txt	chr2	206815829	2:207680553:A:G:imp:v1	A	G	0.0287639	0.914816	34049	ADD	0.131061	0.02353	31.0244	7.5938	NA	2.55e-08	ADAM23	rs116209154	0.000910339	31.0226
ADAM23_O75077_OID20651_v1_Inflammation_expo_rt.txt	chr2	206825755	2:207690479:G:A:imp:v1	G	A	0.0137996	0.921864	34049	ADD	-0.246296	0.0335773	53.805	12.6548	NA	2.21e-13	ADAM23	rs115546836	0.00157773	53.8019
ADAM23_O75077_OID20651_v1_Inflammation_expo_rt.txt	chr2	206849757	2:207714481:C:T:imp:v1	C	T	0.0242738	0.999923	34049	ADD	-0.262242	0.0244478	115.059	26.117	NA	7.64e-27	ADAM23	rs7575427	0.00336787	115.053
ADAM23_O75077_OID20651_v1_Inflammation_expo_rt.txt	chr2	206858868	2:207723592:G:A:imp:v1	G	A	0.107657	0.947714	34049	ADD	-0.0964752	0.0124658	59.8952	13.9998	NA	1e-14	ADAM23	rs16838934	0.001756	59.8916
ADAM23_O75077_OID20651_v1_Inflammation_expo_rt.txt	chr2	206861852	2:207726576:G:T:imp:v1	G	T	0.127315	0.980661	34049	ADD	-0.0845585	0.011402	54.9985	12.9186	NA	1.21e-13	ADAM23	rs67362332	0.00161268	54.9955
ADAM23_O75077_OID20651_v1_Inflammation_expo_rt.txt	chr2	206870629	2:207735353:G:A:imp:v1	G	A	0.0309701	0.990548	34049	ADD	-0.342966	0.0218109	247.26	54.9882	NA	1.03e-55	ADAM23	rs76065962	0.00720955	247.246
ADAM23_O75077_OID20651_v1_Inflammation_expo_rt.txt	chr2	206872996	2:207737720:T:C:imp:v1	T	C	0.71262	0.971457	34049	ADD	0.0779962	0.00843209	85.5611	19.6485	NA	2.25e-20	ADAM23	rs11885081	0.00250658	85.5561
ADAM23_O75077_OID20651_v1_Inflammation_expo_rt.txt	chr2	206890978	2:207755702:C:T:imp:v1	C	T	0.0576976	0.997931	34049	ADD	-0.139124	0.0161514	74.196	17.1504	NA	7.07e-18	ADAM23	rs114535188	0.00217437	74.1922
ADAM23_O75077_OID20651_v1_Inflammation_expo_rt.txt	chr2	206905815	2:207770539:C:T:imp:v1	C	T	0.0510172	0.956446	34049	ADD	0.236422	0.0174757	183.023	40.9747	NA	1.06e-41	ADAM23	rs921623	0.00534656	183.013
ADAM23_O75077_OID20651_v1_Inflammation_expo_rt.txt	chr2	206934684	2:207799408:C:G:imp:v1	C	G	0.0658169	1.00358	34049	ADD	0.155151	0.0151449	104.948	23.9017	NA	1.25e-24	ADAM23	rs35946784	0.00307281	104.942
ADAM23_O75077_OID20651_v1_Inflammation_expo_rt.txt	chr2	206947967	2:207812691:G:A:imp:v1	G	A	0.0156536	0.968544	34049	ADD	-0.318701	0.0307903	107.137	24.3816	NA	4.15e-25	ADAM23	rs145806557	0.00313668	107.131
ADAM23_O75077_OID20651_v1_Inflammation_expo_rt.txt	chr2	206975082	2:207839806:T:G:imp:v1	T	G	0.0370971	0.902188	34049	ADD	-0.124309	0.0209566	35.1854	8.52322	NA	3e-09	ADAM23	rs148647364	0.00103231	35.1834
ADAM23_O75077_OID20651_v1_Inflammation_expo_rt.txt	chr2	206975608	2:207840332:G:C:imp:v1	G	C	0.226982	0.992095	34049	ADD	0.0493627	0.00901545	29.9794	7.35985	NA	4.37e-08	ADAM23	rs4675644	0.000879704	29.9776
ADAM23_O75077_OID20651_v1_Inflammation_expo_rt.txt	chr2	206985404	2:207850128:A:C:imp:v1	A	C	0.0704083	0.860794	34049	ADD	0.0915259	0.015854	33.3281	8.10874	NA	7.79e-09	ADAM23	rs75769802	0.00097787	33.3261
ADAM23_O75077_OID20651_v1_Inflammation_expo_rt.txt	chr2	206993424	2:207858148:A:G:imp:v1	A	G	0.581869	0.997773	34049	ADD	-0.0601805	0.00763349	62.1533	14.4979	NA	3.18e-15	ADAM23	rs1453170	0.00182209	62.1498
ADAM23_O75077_OID20651_v1_Inflammation_expo_rt.txt	chr2	207001711	2:207866435:G:A:imp:v1	G	A	0.0295304	1.00753	34049	ADD	0.273007	0.0221318	152.165	34.2342	NA	5.83e-35	ADAM23	rs187272743	0.00444911	152.156
ADAM23_O75077_OID20651_v1_Inflammation_expo_rt.txt	chr2	207063398	2:207928122:T:G:imp:v1	T	G	0.324138	0.989329	34049	ADD	-0.0547721	0.00808364	45.9097	10.9072	NA	1.24e-11	ADAM23	rs1263602	0.00134653	45.907
ADAM23_O75077_OID20651_v1_Inflammation_expo_rt.txt	chr2	207084044	2:207948768:C:T:imp:v1	C	T	0.717745	0.994936	34049	ADD	-0.0607465	0.00837746	52.5796	12.3839	NA	4.13e-13	ADAM23	rs2543593	0.00154185	52.5766
ADAM23_O75077_OID20651_v1_Inflammation_expo_rt.txt	chr2	207130392	2:207995116:T:C:imp:v1	T	C	0.0467682	0.985752	34049	ADD	0.17017	0.0179442	89.9328	20.6084	NA	2.46e-21	ADAM23	rs7579488	0.00263432	89.9275
ADAM23_O75077_OID20651_v1_Inflammation_expo_rt.txt	chr2	207132503	2:207997227:C:T:imp:v1	C	T	0.606261	0.989058	34049	ADD	-0.0448022	0.00774271	33.4822	8.14315	NA	7.19e-09	ADAM23	rs13424650	0.000982384	33.4801
ADAM23_O75077_OID20651_v1_Inflammation_expo_rt.txt	chr2	207175083	2:208039807:G:A:imp:v1	G	A	0.0290763	0.988923	34049	ADD	-0.212411	0.0225048	89.0849	20.4222	NA	3.78e-21	ADAM23	rs118076330	0.00260954	89.0796
ADAM23_O75077_OID20651_v1_Inflammation_expo_rt.txt	chr2	207212261	2:208076985:G:T:imp:v1	G	T	0.020727	0.974769	34049	ADD	0.153961	0.0267538	33.1169	8.06157	NA	8.68e-09	ADAM23	rs145985929	0.000971681	33.115
ADAM23_O75077_OID20651_v1_Inflammation_expo_rt.txt	chr2	207243804	2:208108528:T:C:imp:v1	T	C	0.0166525	1.001	34049	ADD	-0.219726	0.0293761	55.947	13.1281	NA	7.45e-14	ADAM23	rs114617574	0.00164043	55.9434
ADAM23_O75077_OID20651_v1_Inflammation_expo_rt.txt	chr2	207249906	2:208114630:A:C:imp:v1	A	C	0.121384	0.996233	34049	ADD	-0.0909335	0.0115403	62.089	14.4838	NA	3.28e-15	ADAM23	rs1035263	0.00182019	62.0852
ADAM23_O75077_OID20651_v1_Inflammation_expo_rt.txt	chr2	207255484	2:208120208:A:C:imp:v1	A	C	0.638802	0.967991	34049	ADD	-0.056998	0.00795971	51.2772	12.0958	NA	8.02e-13	ADAM23	rs12466346	0.00150372	51.2742
ADAM23_O75077_OID20651_v1_Inflammation_expo_rt.txt	chr2	207288497	2:208153221:C:T:imp:v1	C	T	0.016619	0.993585	34049	ADD	0.220408	0.0295166	55.7599	13.0868	NA	8.19e-14	ADAM23	rs13408952	0.00163496	55.7566
ADAM23_O75077_OID20651_v1_Inflammation_expo_rt.txt	chr2	207288679	2:208153403:G:A:imp:v1	G	A	0.0147161	0.996284	34049	ADD	-0.258171	0.0312849	68.1002	15.8086	NA	1.55e-16	ADAM23	rs146794611	0.00199606	68.0957
ADAM23_O75077_OID20651_v1_Inflammation_expo_rt.txt	chr2	207344777	2:208209501:T:G:imp:v1	T	G	0.988886	0.979107	34049	ADD	-0.27401	0.0362629	57.0964	13.382	NA	4.15e-14	ADAM23	rs6435374	0.00167408	57.0929
ADAM8_P78325_OID21039_v1_Neurology_expo_rt.txt	chr10	133020669	10:134834173:G:A:imp:v1	G	A	0.512918	0.998745	33895	ADD	0.0557353	0.00750527	55.1478	12.9516	NA	1.12e-13	ADAM8	rs35513684	0.00162437	55.1445
ADAM8_P78325_OID21039_v1_Neurology_expo_rt.txt	chr10	133038284	10:134851788:C:T:imp:v1	C	T	0.038221	0.989153	33895	ADD	0.119933	0.0196652	37.1945	8.97096	NA	1.07e-09	ADAM8	rs117178579	0.00109615	37.1925
ADAM8_P78325_OID21039_v1_Neurology_expo_rt.txt	chr10	133054731	10:134868235:A:T:imp:v1	A	T	0.0120728	0.911566	33895	ADD	-0.223484	0.0359586	38.6265	9.28974	NA	5.13e-10	ADAM8	rs150023455	0.0011383	38.6244
ADAM8_P78325_OID21039_v1_Neurology_expo_rt.txt	chr10	133077487	10:134890991:C:T:imp:v1	C	T	0.0123033	0.898548	33895	ADD	-0.249004	0.0358878	48.1416	11.4017	NA	3.97e-12	ADAM8	rs117206175	0.0014183	48.1386
ADAM8_P78325_OID21039_v1_Neurology_expo_rt.txt	chr10	133102328	10:134915832:C:T:imp:v1	C	T	0.16457	0.998608	33895	ADD	-0.0739342	0.0101197	53.3776	12.5603	NA	2.75e-13	ADAM8	rs9419103	0.0015723	53.374
ADAM8_P78325_OID21039_v1_Neurology_expo_rt.txt	chr10	133112035	10:134925539:G:C:imp:v1	G	C	0.615057	0.918642	33895	ADD	0.0522938	0.0080404	42.3005	10.1064	NA	7.83e-11	ADAM8	rs68091826	0.00124643	42.298
ADAM8_P78325_OID21039_v1_Neurology_expo_rt.txt	chr10	133112398	10:134925902:C:T:imp:v1	C	T	0.112914	0.839536	33895	ADD	0.103536	0.0129341	64.0781	14.9223	NA	1.2e-15	ADAM8	rs138450312	0.00188692	64.0744
ADAM8_P78325_OID21039_v1_Neurology_expo_rt.txt	chr10	133140416	10:134953920:G:A:imp:v1	G	A	0.235873	0.985311	33895	ADD	-0.0930764	0.00889981	109.375	24.8719	NA	1.34e-25	ADAM8	rs34774469	0.0032165	109.368
ADAM8_P78325_OID21039_v1_Neurology_expo_rt.txt	chr10	133152554	10:134966058:C:T:imp:v1	C	T	0.21428	0.9092	33895	ADD	0.130962	0.00958556	186.663	41.7692	NA	1.7e-42	ADAM8	rs116120288	0.0054769	186.651
ADAM8_P78325_OID21039_v1_Neurology_expo_rt.txt	chr10	133174430	10:134987934:A:G:imp:v1	A	G	0.84991	0.989929	33895	ADD	-0.178847	0.0105494	287.413	63.7398	NA	1.82e-64	ADAM8	rs4240519	0.00840824	287.397
ADAM8_P78325_OID21039_v1_Neurology_expo_rt.txt	chr10	133181957	10:134995461:T:G:imp:v1	T	G	0.0621856	0.983405	33895	ADD	-0.0875561	0.0156607	31.2572	7.64588	NA	2.26e-08	ADAM8	rs61863460	0.000921329	31.2554
ADAM8_P78325_OID21039_v1_Neurology_expo_rt.txt	chr10	133182509	10:134996013:G:A:imp:v1	G	A	0.0114334	0.813204	33895	ADD	0.256586	0.0391099	43.0419	10.271	NA	5.36e-11	ADAM8	rs3008396	0.00126825	43.0395
ADAM8_P78325_OID21039_v1_Neurology_expo_rt.txt	chr10	133183027	10:134996531:C:T:imp:v1	C	T	0.0485625	0.999029	33895	ADD	0.285067	0.0174493	266.893	59.2679	NA	5.4e-60	ADAM8	rs145177954	0.00781261	266.878
ADAM8_P78325_OID21039_v1_Neurology_expo_rt.txt	chr10	133222003	10:135035507:C:T:imp:v1	C	T	0.460952	0.849635	33895	ADD	-0.09197	0.00815987	127.036	28.7388	NA	1.82e-29	ADAM8	rs74321816	0.00373392	127.028
ADAM8_P78325_OID21039_v1_Neurology_expo_rt.txt	chr10	133239396	10:135052900:C:T:imp:v1	C	T	0.306049	0.935311	33895	ADD	-0.0747832	0.00841678	78.9433	18.1944	NA	6.39e-19	ADAM8	rs2270194	0.00232365	78.9388
ADAM8_P78325_OID21039_v1_Neurology_expo_rt.txt	chr10	133242563	10:135056067:C:G:imp:v1	C	G	0.0281576	0.900348	33895	ADD	0.248982	0.0238837	108.676	24.7187	NA	1.91e-25	ADAM8	rs150417665	0.003196	108.669
ADAM8_P78325_OID21039_v1_Neurology_expo_rt.txt	chr10	133245066	10:135058570:C:T:imp:v1	C	T	0.0693868	0.939332	33895	ADD	0.196047	0.0152247	165.815	37.2167	NA	6.07e-38	ADAM8	rs74164131	0.00486819	165.805
ADAM8_P78325_OID21039_v1_Neurology_expo_rt.txt	chr10	133247368	10:135060872:T:C:imp:v1	T	C	0.918793	0.993467	33895	ADD	-0.538762	0.0137711	1530.59	334.054	NA	0	ADAM8	rs3008373	0.0432056	1530.49
ADAM8_P78325_OID21039_v1_Neurology_expo_rt.txt	chr10	133264727	10:135078231:T:A:imp:v1	T	A	0.0119139	0.841385	33895	ADD	0.519349	0.0376929	189.845	42.4638	NA	3.44e-43	ADAM8	rs76596319	0.00556978	189.834
ADAM8_P78325_OID21039_v1_Neurology_expo_rt.txt	chr10	133273262	10:135086766:G:A:imp:v1	G	A	0.0489447	0.935709	33895	ADD	-0.21889	0.0179616	148.512	33.4357	NA	3.67e-34	ADAM8	rs45451297	0.00436242	148.503
ADAM8_P78325_OID21039_v1_Neurology_expo_rt.txt	chr10	133273956	10:135087460:C:T:imp:v1	C	T	0.0142539	0.807318	33895	ADD	-0.247981	0.0352031	49.6219	11.7295	NA	1.86e-12	ADAM8	rs11101675	0.00146185	49.6192
ADAM8_P78325_OID21039_v1_Neurology_expo_rt.txt	chr10	133280169	10:135093673:C:T:imp:v1	C	T	0.259301	1.00369	33895	ADD	-0.176308	0.0085378	426.435	94.0131	NA	9.7e-95	ADAM8	rs12778349	0.0124247	426.409
ADAM8_P78325_OID21039_v1_Neurology_expo_rt.txt	chr10	133281648	10:135095152:G:A:imp:v1	G	A	0.0255495	0.993926	33895	ADD	-0.227845	0.0238311	91.4097	20.9326	NA	1.17e-21	ADAM8	rs77720165	0.00268959	91.404
ADAM8_P78325_OID21039_v1_Neurology_expo_rt.txt	chr10	133283726	10:135097230:A:T:imp:v1	A	T	0.558145	0.704389	33895	ADD	-0.221983	0.00899868	608.532	133.632	NA	2.33e-134	ADAM8	rs55830225	0.0176367	608.494
ADAM8_P78325_OID21039_v1_Neurology_expo_rt.txt	chr10	133292430	10:135105934:A:C:imp:v1	A	C	0.665469	0.716533	33895	ADD	-0.258006	0.00938724	755.409	165.573	NA	2.67e-166	ADAM8	rs4993736	0.0218009	755.367
ADAM8_P78325_OID21039_v1_Neurology_expo_rt.txt	chr10	133328338	10:135141842:C:T:imp:v1	C	T	0.0286924	0.91212	33895	ADD	-0.161979	0.0235222	47.4199	11.2419	NA	5.73e-12	ADAM8	rs138815080	0.00139707	47.4172
ADAM8_P78325_OID21039_v1_Neurology_expo_rt.txt	chr10	133337096	10:135150600:T:C:imp:v1	T	C	0.128977	0.699786	33895	ADD	0.24811	0.0133725	344.241	76.1188	NA	7.61e-77	ADAM8	rs35297981	0.010054	344.221
ADAM8_P78325_OID21039_v1_Neurology_expo_rt.txt	chr10	133355092	10:135168596:A:G:imp:v1	A	G	0.0326266	0.997024	33895	ADD	-0.315723	0.0211379	223.094	49.7185	NA	1.91e-50	ADAM8	rs60244572	0.00653889	223.081
ADAM8_P78325_OID21039_v1_Neurology_expo_rt.txt	chr10	133362309	10:135175813:G:C:imp:v1	G	C	0.0483742	0.941553	33895	ADD	0.448117	0.0180129	618.892	135.885	NA	1.3e-136	ADAM8	rs35819171	0.0179317	618.856
ADAM8_P78325_OID21039_v1_Neurology_expo_rt.txt	chr10	133367655	10:135181159:G:A:imp:v1	G	A	0.0278	0.866639	33895	ADD	0.190718	0.0244979	60.6072	14.1569	NA	6.97e-15	ADAM8	rs3975646	0.0017849	60.6038
ADAM8_P78325_OID21039_v1_Neurology_expo_rt.txt	chr10	133388829	10:135202333:G:A:imp:v1	G	A	0.841049	0.91315	33895	ADD	-0.244253	0.0107329	517.904	113.917	NA	1.21e-114	ADAM8	rs10745296	0.0150496	517.869
ADAM8_P78325_OID21039_v1_Neurology_expo_rt.txt	chr10	133390040	10:135203544:G:A:imp:v1	G	A	0.0111226	1.00753	33895	ADD	0.449182	0.0356367	158.873	35.7001	NA	1.99e-36	ADAM8	rs117126128	0.00466534	158.863
ADAM8_P78325_OID21039_v1_Neurology_expo_rt.txt	chr10	133422451	10:135235955:A:C:imp:v1	A	C	0.0138465	0.962951	33895	ADD	-0.392846	0.0326984	144.342	32.5241	NA	2.99e-33	ADAM8	rs146008888	0.00424044	144.333
ADAM8_P78325_OID21039_v1_Neurology_expo_rt.txt	chr10	133430849	10:135244353:G:A:imp:v1	G	A	0.704801	0.950742	33895	ADD	-0.156876	0.00843102	346.222	76.55	NA	2.82e-77	ADAM8	rs9419061	0.0101112	346.2
ADAM8_P78325_OID21039_v1_Neurology_expo_rt.txt	chr10	133446724	10:135260228:C:T:imp:v1	C	T	0.0593907	0.941545	33895	ADD	0.105232	0.01635	41.4247	9.91187	NA	1.22e-10	ADAM8	rs61868302	0.00122066	41.4223
ADAM8_P78325_OID21039_v1_Neurology_expo_rt.txt	chr10	133461697	10:135275201:G:A:imp:v1	G	A	0.807057	0.986529	33895	ADD	-0.0565718	0.00956474	34.9827	8.47802	NA	3.33e-09	ADAM8	rs2251083	0.00103103	34.9807
ADAM8_P78325_OID21039_v1_Neurology_expo_rt.txt	chr10	133481262	10:135294766:C:T:imp:v1	C	T	0.0599498	1.00638	33895	ADD	0.142185	0.0157423	81.578	18.7735	NA	1.68e-19	ADAM8	rs112128025	0.002401	81.5728
ADAM8_P78325_OID21039_v1_Neurology_expo_rt.txt	chr10	133481761	10:135295265:T:C:imp:v1	T	C	0.0771802	0.983871	33895	ADD	0.102819	0.0141669	52.6739	12.4047	NA	3.94e-13	ADAM8	rs12247760	0.00155163	52.671
ADAM8_P78325_OID21039_v1_Neurology_expo_rt.txt	chr10	133507674	10:135321178:CAAAAAAAAAA:C:imp:v1	CAAAAAAAAAA	C	0.137043	0.902334	33895	ADD	0.0719859	0.0114757	39.3491	9.45049	NA	3.54e-10	ADAM8	rs76129218	0.00115957	39.3469
ADAM8_P78325_OID21039_v1_Neurology_expo_rt.txt	chr10	133535875	10:135349379:T:C:imp:v1	T	C	0.0147879	0.898179	33895	ADD	-0.269087	0.0327925	67.3344	15.6399	NA	2.29e-16	ADAM8	rs41299432	0.00198262	67.3303
ADAM8_P78325_OID21039_v1_Neurology_expo_rt.txt	chr10	133622368	10:135435872:C:T:imp:v1	C	T	0.0727508	0.797687	33895	ADD	0.104696	0.0161652	41.9467	10.0278	NA	9.38e-11	ADAM8	rs11101906	0.00123602	41.9442
ADAMTS15_Q8TE58_OID21275_v1_Oncology_expo_rt.txt	chr11	130457987	11:130327882:A:G:imp:v1	A	G	0.475657	0.988781	33533	ADD	-0.0671196	0.00760031	77.9895	17.9847	NA	1.04e-18	ADAMTS15	rs10894203	0.00232036	77.9848
ADAMTS15_Q8TE58_OID21275_v1_Oncology_expo_rt.txt	chr11	130474168	11:130344063:G:A:imp:v1	G	A	0.0548853	0.914528	33533	ADD	0.192702	0.0173208	123.776	28.0254	NA	9.43e-29	ADAMTS15	rs73044885	0.0036776	123.769
ADAMTS15_Q8TE58_OID21275_v1_Oncology_expo_rt.txt	chr11	130485021	11:130354916:C:T:imp:v1	C	T	0.43146	0.991034	33533	ADD	0.0496217	0.00765204	42.0522	10.0512	NA	8.89e-11	ADAMTS15	rs7113818	0.00125248	42.0497
ADAMTS15_Q8TE58_OID21275_v1_Oncology_expo_rt.txt	chr11	130831609	11:130701504:C:T:imp:v1	C	T	0.534466	0.964748	33533	ADD	0.0465709	0.00770645	36.5192	8.82054	NA	1.51e-09	ADAMTS15	rs1078020	0.00108787	36.517
ADAMTS15_Q8TE58_OID21275_v1_Oncology_expo_rt.txt	chr11	130898369	11:130768264:C:T:imp:v1	C	T	0.647074	0.998025	33533	ADD	0.0771402	0.00790307	95.2728	21.7802	NA	1.66e-22	ADAMTS15	rs1368852	0.00283312	95.2673
ADAMTS15_Q8TE58_OID21275_v1_Oncology_expo_rt.txt	chr11	130953681	11:130823576:T:C:imp:v1	T	C	0.493252	0.997114	33533	ADD	0.0567197	0.0075573	56.3293	13.2126	NA	6.13e-14	ADAMTS15	rs10466547	0.001677	56.326
ADAMTS16_Q8TE57_OID20089_v1_Cardiometabolic_expo_rt.txt	chr5	4723769	5:4723882:A:G:imp:v1	A	G	0.588384	0.990225	33043	ADD	0.0482571	0.00721083	44.787	10.6582	NA	2.2e-11	ADAMTS16	rs1393123	0.00135358	44.7843
ADAMTS16_Q8TE57_OID20089_v1_Cardiometabolic_expo_rt.txt	chr5	4835092	5:4835205:G:A:imp:v1	G	A	0.129755	1.004	33043	ADD	-0.0877768	0.010485	70.0844	16.2455	NA	5.68e-17	ADAMTS16	rs816480	0.00211652	70.0804
ADAMTS16_Q8TE57_OID20089_v1_Cardiometabolic_expo_rt.txt	chr5	4895564	5:4895677:T:C:imp:v1	T	C	0.553044	0.981533	33043	ADD	-0.0529288	0.00717043	54.4871	12.8056	NA	1.56e-13	ADAMTS16	rs247589	0.00164626	54.4838
ADAMTS16_Q8TE57_OID20089_v1_Cardiometabolic_expo_rt.txt	chr5	4911302	5:4911415:G:A:imp:v1	G	A	0.0584137	0.983791	33043	ADD	-0.169333	0.0151759	124.501	28.1842	NA	6.54e-29	ADAMTS16	rs76565374	0.00375372	124.494
ADAMTS16_Q8TE57_OID20089_v1_Cardiometabolic_expo_rt.txt	chr5	4972022	5:4972135:G:A:imp:v1	G	A	0.0281284	0.924717	33043	ADD	-0.150605	0.0222109	45.9776	10.9222	NA	1.2e-11	ADAMTS16	rs142822839	0.00138952	45.9748
ADAMTS16_Q8TE57_OID20089_v1_Cardiometabolic_expo_rt.txt	chr5	4977333	5:4977446:A:G:imp:v1	A	G	0.922045	0.973829	33043	ADD	-0.0976153	0.0133457	53.5001	12.5874	NA	2.59e-13	ADAMTS16	rs42202	0.00161648	53.4967
ADAMTS16_Q8TE57_OID20089_v1_Cardiometabolic_expo_rt.txt	chr5	4982701	5:4982814:A:G:imp:v1	A	G	0.338347	1.00247	33043	ADD	-0.122806	0.00745287	271.516	60.2754	NA	5.3e-61	ADAMTS16	rs40468	0.00815002	271.497
ADAMTS16_Q8TE57_OID20089_v1_Cardiometabolic_expo_rt.txt	chr5	4995200	5:4995313:C:T:imp:v1	C	T	0.0295411	0.905965	33043	ADD	-0.13701	0.02191	39.104	9.39597	NA	4.02e-10	ADAMTS16	rs145739077	0.00118202	39.1015
ADAMTS16_Q8TE57_OID20089_v1_Cardiometabolic_expo_rt.txt	chr5	5024508	5:5024621:G:T:imp:v1	G	T	0.426724	0.986211	33043	ADD	-0.068251	0.00719087	90.0855	20.6419	NA	2.28e-21	ADAMTS16	rs465871	0.0027189	90.0801
ADAMTS16_Q8TE57_OID20089_v1_Cardiometabolic_expo_rt.txt	chr5	5125039	5:5125152:C:G:imp:v1	C	G	0.523275	0.994083	33043	ADD	-0.0667129	0.00708939	88.5527	20.3054	NA	4.95e-21	ADAMTS16	rs814781	0.00267276	88.5474
ADAMTS16_Q8TE57_OID20089_v1_Cardiometabolic_expo_rt.txt	chr5	5133826	5:5133939:G:A:imp:v1	G	A	0.110281	1.00374	33043	ADD	0.0640162	0.0112471	32.3969	7.9007	NA	1.26e-08	ADAMTS16	rs1108236	0.000979476	32.3946
ADAMTS16_Q8TE57_OID20089_v1_Cardiometabolic_expo_rt.txt	chr5	5135551	5:5135664:T:C:imp:v1	T	C	0.340956	0.994405	33043	ADD	-0.0643085	0.00746744	74.164	17.1433	NA	7.19e-18	ADAMTS16	rs2895492	0.00223944	74.1595
ADAMTS16_Q8TE57_OID20089_v1_Cardiometabolic_expo_rt.txt	chr5	5140294	5:5140407:G:C:imp:v1	G	C	0.0707872	0.942272	33043	ADD	-0.0776501	0.0141824	29.9769	7.3593	NA	4.37e-08	ADAMTS16	rs186486939	0.000906382	29.9749
ADAMTS16_Q8TE57_OID20089_v1_Cardiometabolic_expo_rt.txt	chr5	5150901	5:5151014:T:C:imp:v1	T	C	0.0261707	0.953804	33043	ADD	-0.128461	0.0226578	32.1443	7.84424	NA	1.43e-08	ADAMTS16	rs2619786	0.000971864	32.1426
ADAMTS16_Q8TE57_OID20089_v1_Cardiometabolic_expo_rt.txt	chr5	5154345	5:5154458:T:C:imp:v1	T	C	0.454756	0.989334	33043	ADD	0.0804541	0.00713201	127.255	28.7867	NA	1.63e-29	ADAMTS16	rs6555331	0.0038364	127.247
ADAMTS16_Q8TE57_OID20089_v1_Cardiometabolic_expo_rt.txt	chr5	5195677	5:5195790:A:G:imp:v1	A	G	0.878218	0.975294	33043	ADD	0.103063	0.0109306	88.9037	20.3825	NA	4.14e-21	ADAMTS16	rs1346462	0.00268331	88.8979
ADAMTS16_Q8TE57_OID20089_v1_Cardiometabolic_expo_rt.txt	chr5	5248388	5:5248501:C:A:imp:v1	C	A	0.0621604	0.97109	33043	ADD	-0.0992444	0.0148405	44.7211	10.6436	NA	2.27e-11	ADAMTS16	rs16875141	0.0013516	44.7186
ADAMTS16_Q8TE57_OID20089_v1_Cardiometabolic_expo_rt.txt	chr5	5265666	5:5265779:A:G:imp:v1	A	G	0.270887	0.929008	33043	ADD	-0.0913484	0.00824313	122.805	27.813	NA	1.54e-28	ADAMTS16	rs2913664	0.00370277	122.798
ADAMTS16_Q8TE57_OID20089_v1_Cardiometabolic_expo_rt.txt	chr5	5290697	5:5290810:T:C:imp:v1	T	C	0.0301308	1.0001	33043	ADD	0.287411	0.0206472	193.769	43.3204	NA	4.78e-44	ADAMTS16	rs16875264	0.00582996	193.757
ADAMTS16_Q8TE57_OID20089_v1_Cardiometabolic_expo_rt.txt	chr5	5302749	5:5302862:G:A:imp:v1	G	A	0.087603	0.994609	33043	ADD	-0.0804552	0.0125227	41.2777	9.8792	NA	1.32e-10	ADAMTS16	rs73738805	0.00124764	41.2749
ADAMTS16_Q8TE57_OID20089_v1_Cardiometabolic_expo_rt.txt	chr5	5303311	5:5303424:G:A:imp:v1	G	A	0.025149	0.989015	33043	ADD	0.131948	0.0226748	33.8623	8.22802	NA	5.92e-09	ADAMTS16	rs34586473	0.00102375	33.8604
ADAMTS16_Q8TE57_OID20089_v1_Cardiometabolic_expo_rt.txt	chr5	5305765	5:5305878:G:A:imp:v1	G	A	0.147182	0.992831	33043	ADD	-0.0596197	0.0100025	35.5272	8.59944	NA	2.52e-09	ADAMTS16	rs62340883	0.00107403	35.5252
ADAMTS16_Q8TE57_OID20089_v1_Cardiometabolic_expo_rt.txt	chr5	5316997	5:5317110:A:G:imp:v1	A	G	0.8593	0.960321	33043	ADD	-0.0720078	0.010364	48.2732	11.4309	NA	3.71e-12	ADAMTS16	rs2964154	0.00145878	48.2701
ADAMTS16_Q8TE57_OID20089_v1_Cardiometabolic_expo_rt.txt	chr5	5319473	5:5319586:G:A:imp:v1	G	A	0.0535053	0.867373	33043	ADD	0.114061	0.0168437	45.8567	10.8954	NA	1.27e-11	ADAMTS16	rs72647767	0.00138585	45.8536
ADAMTS16_Q8TE57_OID20089_v1_Cardiometabolic_expo_rt.txt	chr5	5476563	5:5476676:G:A:imp:v1	G	A	0.635252	1.00257	33043	ADD	-0.0409777	0.00732493	31.296	7.65456	NA	2.22e-08	ADAMTS16	rs1004263	0.000946232	31.2941
ADAMTS1_Q9UHI8_OID30528_v1_Inflammation_II_expo_rt.txt	chr21	26843740	21:28216059:A:G:imp:v1	A	G	0.257298	0.98067	32981	ADD	0.0484363	0.0088238	30.1323	7.39409	NA	4.04e-08	ADAMTS1	rs400852	0.000912789	30.1304
ADAMTS4_O75173_OID30471_v1_Inflammation_II_expo_rt.txt	chr1	161145128	1:161114918:G:C:imp:v1	G	C	0.0147382	0.971647	32981	ADD	0.180737	0.0316982	32.5105	7.92611	NA	1.19e-08	ADAMTS4	rs144200948	0.000984766	32.5086
ADAMTS4_O75173_OID30471_v1_Inflammation_II_expo_rt.txt	chr1	161189645	1:161159435:T:C:imp:v1	T	C	0.079796	0.994702	32981	ADD	-0.0782042	0.0139331	31.5038	7.70103	NA	1.99e-08	ADAMTS4	rs36123104	0.000954303	31.502
ADAMTS4_O75173_OID30471_v1_Inflammation_II_expo_rt.txt	chr1	161206347	1:161176137:A:G:imp:v1	A	G	0.585738	0.996309	32981	ADD	-0.118273	0.00765875	238.483	53.0745	NA	8.42e-54	ADAMTS4	rs4656993	0.00717898	238.467
ADAMTS4_O75173_OID30471_v1_Inflammation_II_expo_rt.txt	chr1	161219923	1:161189713:C:T:imp:v1	C	T	0.331221	0.970522	32981	ADD	-0.057007	0.00812686	49.2051	11.6372	NA	2.31e-12	ADAMTS4	rs4489574	0.0014897	49.2022
ADAMTS8_Q9UP79_OID21502_v1_Oncology_expo_rt.txt	chr11	129910073	11:129779968:C:T:imp:v1	C	T	0.289346	0.967064	33822	ADD	-0.0466251	0.00843203	30.5756	7.49336	NA	3.21e-08	ADAMTS8	rs1650815	0.000903199	30.5738
ADAMTS8_Q9UP79_OID21502_v1_Oncology_expo_rt.txt	chr11	129927757	11:129797652:T:G:imp:v1	T	G	0.0388447	0.920687	33822	ADD	-0.176191	0.0202809	75.4732	17.4313	NA	3.7e-18	ADAMTS8	rs1783920	0.00222652	75.4688
ADAMTS8_Q9UP79_OID21502_v1_Oncology_expo_rt.txt	chr11	130012271	11:129882166:T:C:imp:v1	T	C	0.0267129	0.963901	33822	ADD	-0.152249	0.0237483	41.1005	9.83983	NA	1.45e-10	ADAMTS8	rs142981107	0.00121372	41.0978
ADAMTS8_Q9UP79_OID21502_v1_Oncology_expo_rt.txt	chr11	130061093	11:129930988:G:A:imp:v1	G	A	0.016599	0.811387	33822	ADD	-0.21743	0.0326559	44.3317	10.5572	NA	2.77e-11	ADAMTS8	rs146905472	0.00130902	44.3292
ADAMTS8_Q9UP79_OID21502_v1_Oncology_expo_rt.txt	chr11	130064718	11:129934613:G:C:imp:v1	G	C	0.731489	0.990933	33822	ADD	0.0700421	0.00852018	67.5804	15.6941	NA	2.02e-16	ADAMTS8	rs7105991	0.00199414	67.5764
ADAMTS8_Q9UP79_OID21502_v1_Oncology_expo_rt.txt	chr11	130129005	11:129998900:T:C:imp:v1	T	C	0.993052	1.00586	33822	ADD	-0.248692	0.0451061	30.3985	7.4537	NA	3.52e-08	ADAMTS8	rs651935	0.000897974	30.3968
ADAMTS8_Q9UP79_OID21502_v1_Oncology_expo_rt.txt	chr11	130151241	11:130021136:A:T:imp:v1	A	T	0.0958503	0.943677	33822	ADD	-0.10955	0.0131511	69.3911	16.0928	NA	8.08e-17	ADAMTS8	rs78124835	0.00204744	69.3865
ADAMTS8_Q9UP79_OID21502_v1_Oncology_expo_rt.txt	chr11	130182750	11:130052645:A:G:imp:v1	A	G	0.0410068	0.959287	33822	ADD	0.119126	0.019354	37.8853	9.12477	NA	7.5e-10	ADAMTS8	rs117056648	0.00111889	37.8831
ADAMTS8_Q9UP79_OID21502_v1_Oncology_expo_rt.txt	chr11	130191475	11:130061370:C:T:imp:v1	C	T	0.181022	0.964889	33822	ADD	-0.0618939	0.00993881	38.7817	9.32426	NA	4.74e-10	ADAMTS8	rs860841	0.00114533	38.7794
ADAMTS8_Q9UP79_OID21502_v1_Oncology_expo_rt.txt	chr11	130205539	11:130075434:G:A:imp:v1	G	A	0.637157	0.9937	33822	ADD	0.0934373	0.00784164	141.98	32.0078	NA	9.82e-33	ADAMTS8	rs1786145	0.00418031	141.971
ADAMTS8_Q9UP79_OID21502_v1_Oncology_expo_rt.txt	chr11	130234603	11:130104498:A:T:imp:v1	A	T	0.224372	0.965905	33822	ADD	0.0818753	0.00916867	79.7431	18.3702	NA	4.26e-19	ADAMTS8	rs17605148	0.00235218	79.7384
ADAMTS8_Q9UP79_OID21502_v1_Oncology_expo_rt.txt	chr11	130245851	11:130115746:G:A:imp:v1	G	A	0.0905328	0.994179	33822	ADD	-0.290108	0.0131411	487.366	107.273	NA	5.33e-108	ADAMTS8	rs12364607	0.0142051	487.338
ADAMTS8_Q9UP79_OID21502_v1_Oncology_expo_rt.txt	chr11	130311122	11:130181017:A:C:imp:v1	A	C	0.0174253	0.899863	33822	ADD	0.196527	0.0302896	42.0978	10.0614	NA	8.68e-11	ADAMTS8	rs61915097	0.00124313	42.0951
ADAMTS8_Q9UP79_OID21502_v1_Oncology_expo_rt.txt	chr11	130312585	11:130182480:G:C:imp:v1	G	C	0.100721	0.993955	33822	ADD	-0.117269	0.0125264	87.6422	20.1055	NA	7.84e-21	ADAMTS8	rs7113705	0.00258458	87.6371
ADAMTS8_Q9UP79_OID21502_v1_Oncology_expo_rt.txt	chr11	130319413	11:130189308:C:T:imp:v1	C	T	0.521254	0.774265	33822	ADD	0.130092	0.00855062	231.477	51.5467	NA	2.84e-52	ADAMTS8	rs704627	0.00679743	231.462
ADAMTS8_Q9UP79_OID21502_v1_Oncology_expo_rt.txt	chr11	130319448	11:130189343:T:A:imp:v1	T	A	0.284638	0.764295	33822	ADD	0.0901631	0.00952667	89.5727	20.5293	NA	2.96e-21	ADAMTS8	rs7106227	0.00264136	89.5674
ADAMTS8_Q9UP79_OID21502_v1_Oncology_expo_rt.txt	chr11	130349753	11:130219648:A:G:imp:v1	A	G	0.0234069	0.893729	33822	ADD	0.21215	0.0262869	65.1339	15.155	NA	7e-16	ADAMTS8	rs186506052	0.00192209	65.1301
ADAMTS8_Q9UP79_OID21502_v1_Oncology_expo_rt.txt	chr11	130368152	11:130238047:A:G:imp:v1	A	G	0.0492104	0.912315	33822	ADD	-0.207912	0.0181869	130.689	29.5382	NA	2.9e-30	ADAMTS8	rs117964542	0.00384917	130.682
ADAMTS8_Q9UP79_OID21502_v1_Oncology_expo_rt.txt	chr11	130378998	11:130248893:A:G:imp:v1	A	G	0.0303488	0.9927	33822	ADD	0.221428	0.0219895	101.399	23.1238	NA	7.52e-24	ADAMTS8	rs112876068	0.00298906	101.393
ADAMTS8_Q9UP79_OID21502_v1_Oncology_expo_rt.txt	chr11	130381472	11:130251367:T:C:imp:v1	T	C	0.0436994	1.001	33822	ADD	-0.176896	0.0183785	92.6438	21.2034	NA	6.26e-22	ADAMTS8	rs73569417	0.00273167	92.6382
ADAMTS8_Q9UP79_OID21502_v1_Oncology_expo_rt.txt	chr11	130385218	11:130255113:T:C:imp:v1	T	C	0.670096	0.999055	33822	ADD	0.120901	0.00800186	228.285	50.8507	NA	1.41e-51	ADAMTS8	rs3740890	0.00670436	228.272
ADAMTS8_Q9UP79_OID21502_v1_Oncology_expo_rt.txt	chr11	130386537	11:130256432:C:T:imp:v1	C	T	0.0907964	0.833841	33822	ADD	0.181447	0.014329	160.349	36.0227	NA	9.49e-37	ADAMTS8	rs35651461	0.00471861	160.34
ADAMTS8_Q9UP79_OID21502_v1_Oncology_expo_rt.txt	chr11	130387263	11:130257158:C:T:imp:v1	C	T	0.0270656	0.718514	33822	ADD	0.224865	0.0273176	67.7581	15.7332	NA	1.85e-16	ADAMTS8	rs61913869	0.00199936	67.7537
ADAMTS8_Q9UP79_OID21502_v1_Oncology_expo_rt.txt	chr11	130388128	11:130258023:T:C:imp:v1	T	C	0.805016	0.962199	33822	ADD	0.433065	0.00967721	2002.65	436.619	NA	0	ADAMTS8	rs7130658	0.0559015	2002.54
ADAMTS8_Q9UP79_OID21502_v1_Oncology_expo_rt.txt	chr11	130390111	11:130260006:T:A:imp:v1	T	A	0.0819611	0.944899	33822	ADD	0.445118	0.014099	996.729	218.035	NA	9.23e-219	ADAMTS8	rs11222081	0.028626	996.662
ADAMTS8_Q9UP79_OID21502_v1_Oncology_expo_rt.txt	chr11	130392556	11:130262451:C:T:imp:v1	C	T	0.016646	1.00113	33822	ADD	0.174677	0.0293617	35.3922	8.56935	NA	2.7e-09	ADAMTS8	rs76108677	0.00104534	35.3902
ADAMTS8_Q9UP79_OID21502_v1_Oncology_expo_rt.txt	chr11	130393246	11:130263141:C:G:imp:v1	C	G	0.233688	0.903069	33822	ADD	0.215769	0.00935197	532.316	117.053	NA	8.85e-118	ADAMTS8	rs71483615	0.015495	532.287
ADAMTS8_Q9UP79_OID21502_v1_Oncology_expo_rt.txt	chr11	130398040	11:130267935:G:A:imp:v1	G	A	0.0222932	0.994833	33822	ADD	0.184525	0.0255339	52.2246	12.3054	NA	4.95e-13	ADAMTS8	rs73042964	0.00154172	52.2216
ADAMTS8_Q9UP79_OID21502_v1_Oncology_expo_rt.txt	chr11	130405854	11:130275749:T:C:imp:v1	T	C	0.195849	0.995625	33822	ADD	-0.127066	0.00949633	179.04	40.1049	NA	7.85e-41	ADAMTS8	rs11222085	0.00526569	179.028
ADAMTS8_Q9UP79_OID21502_v1_Oncology_expo_rt.txt	chr11	130411286	11:130281181:A:C:imp:v1	A	C	0.102223	0.988575	33822	ADD	-0.264183	0.0124852	447.73	98.6479	NA	2.25e-99	ADAMTS8	rs2291346	0.013065	447.706
ADAMTS8_Q9UP79_OID21502_v1_Oncology_expo_rt.txt	chr11	130413011	11:130282906:T:C:imp:v1	T	C	0.0597678	0.990114	33822	ADD	-0.205504	0.0159376	166.262	37.3143	NA	4.85e-38	ADAMTS8	rs7952710	0.00489177	166.253
ADAMTS8_Q9UP79_OID21502_v1_Oncology_expo_rt.txt	chr11	130421134	11:130291029:G:A:imp:v1	G	A	0.0107474	1.00026	33822	ADD	0.42879	0.0364564	138.338	31.2114	NA	6.15e-32	ADAMTS8	rs115343148	0.00407352	138.33
ADAMTS8_Q9UP79_OID21502_v1_Oncology_expo_rt.txt	chr11	130427431	11:130297326:G:A:imp:v1	G	A	0.0284059	0.977995	33822	ADD	0.502611	0.0228768	482.695	106.257	NA	5.53e-107	ADAMTS8	rs116943477	0.0140708	482.667
ADAMTS8_Q9UP79_OID21502_v1_Oncology_expo_rt.txt	chr11	130432487	11:130302382:G:A:imp:v1	G	A	0.137322	1.00629	33822	ADD	0.22367	0.0108878	422.02	93.0523	NA	8.87e-94	ADAMTS8	rs56057355	0.012324	421.997
ADAMTS8_Q9UP79_OID21502_v1_Oncology_expo_rt.txt	chr11	130438454	11:130308349:T:G:imp:v1	T	G	0.0202679	1.00463	33822	ADD	0.413289	0.0266122	241.183	53.6633	NA	2.17e-54	ADAMTS8	rs114216771	0.00708045	241.168
ADAMTS8_Q9UP79_OID21502_v1_Oncology_expo_rt.txt	chr11	130444845	11:130314740:A:G:imp:v1	A	G	0.0107872	0.982205	33822	ADD	0.407202	0.0367194	122.978	27.8509	NA	1.41e-28	ADAMTS8	rs55773438	0.00362287	122.971
ADAMTS8_Q9UP79_OID21502_v1_Oncology_expo_rt.txt	chr11	130445478	11:130315373:G:A:imp:v1	G	A	0.0245536	0.884827	33822	ADD	0.151431	0.0258201	34.3964	8.34721	NA	4.5e-09	ADAMTS8	rs150522515	0.00101595	34.3944
ADAMTS8_Q9UP79_OID21502_v1_Oncology_expo_rt.txt	chr11	130445559	11:130315454:C:T:imp:v1	C	T	0.064736	0.995244	33822	ADD	0.126549	0.0153135	68.2918	15.8508	NA	1.41e-16	ADAMTS8	rs11222101	0.00201508	68.2878
ADAMTS8_Q9UP79_OID21502_v1_Oncology_expo_rt.txt	chr11	130447849	11:130317744:A:T:imp:v1	A	T	0.340627	0.766292	33822	ADD	-0.0969503	0.00906051	114.497	25.9938	NA	1.01e-26	ADAMTS8	rs56364979	0.00337385	114.49
ADAMTS8_Q9UP79_OID21502_v1_Oncology_expo_rt.txt	chr11	130451680	11:130321575:A:C:imp:v1	A	C	0.0460023	0.965999	33822	ADD	0.124434	0.0182551	46.4632	11.0299	NA	9.33e-12	ADAMTS8	rs11222105	0.00137187	46.4605
ADAMTS8_Q9UP79_OID21502_v1_Oncology_expo_rt.txt	chr11	130455082	11:130324977:G:A:imp:v1	G	A	0.880385	0.875229	33822	ADD	-0.143345	0.0123862	133.933	30.2479	NA	5.65e-31	ADAMTS8	rs2131534	0.00394433	133.925
ADAMTS8_Q9UP79_OID21502_v1_Oncology_expo_rt.txt	chr11	130470787	11:130340682:G:A:imp:v1	G	A	0.132422	0.858051	33822	ADD	0.143242	0.0119704	143.194	32.2732	NA	5.33e-33	ADAMTS8	rs7926619	0.00421589	143.185
ADAMTS8_Q9UP79_OID21502_v1_Oncology_expo_rt.txt	chr11	130475112	11:130345007:C:T:imp:v1	C	T	0.0189965	0.998088	33822	ADD	-0.284335	0.0275774	106.305	24.1992	NA	6.32e-25	ADAMTS8	rs79112658	0.00313323	106.299
ADAMTS8_Q9UP79_OID21502_v1_Oncology_expo_rt.txt	chr11	130478535	11:130348430:T:C:imp:v1	T	C	0.722519	0.990081	33822	ADD	-0.0601878	0.00843817	50.8769	12.0073	NA	9.83e-13	ADAMTS8	rs4936103	0.00150199	50.8739
ADAMTS8_Q9UP79_OID21502_v1_Oncology_expo_rt.txt	chr11	130483343	11:130353238:C:T:imp:v1	C	T	0.0297587	1.00927	33822	ADD	-0.206061	0.0220351	87.4497	20.0632	NA	8.65e-21	ADAMTS8	rs76065045	0.00257894	87.4452
ADAMTS8_Q9UP79_OID21502_v1_Oncology_expo_rt.txt	chr11	130488817	11:130358712:C:T:imp:v1	C	T	0.0324691	0.940795	33822	ADD	-0.287677	0.0218685	173.051	38.7972	NA	1.6e-39	ADAMTS8	rs80353815	0.00509045	173.04
ADAMTS8_Q9UP79_OID21502_v1_Oncology_expo_rt.txt	chr11	130493791	11:130363686:T:C:imp:v1	T	C	0.0383365	0.969916	33822	ADD	0.1576	0.01988	62.8469	14.6509	NA	2.23e-15	ADAMTS8	rs12221863	0.0018547	62.8426
ADAMTS8_Q9UP79_OID21502_v1_Oncology_expo_rt.txt	chr11	130498685	11:130368580:T:A:imp:v1	T	A	0.0481029	0.992825	33822	ADD	0.183413	0.0176304	108.227	24.6203	NA	2.4e-25	ADAMTS8	rs12792252	0.0031897	108.221
ADAMTS8_Q9UP79_OID21502_v1_Oncology_expo_rt.txt	chr11	130525343	11:130395238:G:A:imp:v1	G	A	0.0340459	1.00251	33822	ADD	-0.165382	0.0206985	63.8415	14.8702	NA	1.35e-15	ADAMTS8	rs117478878	0.001884	63.8371
ADAMTS8_Q9UP79_OID21502_v1_Oncology_expo_rt.txt	chr11	130536265	11:130406160:A:G:imp:v1	A	G	0.18939	0.967204	33822	ADD	0.0807612	0.00975344	68.5629	15.9105	NA	1.23e-16	ADAMTS8	rs11222158	0.00202307	68.559
ADAMTS8_Q9UP79_OID21502_v1_Oncology_expo_rt.txt	chr11	130550958	11:130420853:T:A:imp:v1	T	A	0.407715	0.97835	33822	ADD	-0.0807194	0.00773345	108.945	24.7778	NA	1.67e-25	ADAMTS8	rs978891	0.0032108	108.939
ADAMTS8_Q9UP79_OID21502_v1_Oncology_expo_rt.txt	chr11	130570070	11:130439965:C:T:imp:v1	C	T	0.0121991	0.874647	33822	ADD	-0.280205	0.0366354	58.4992	13.6917	NA	2.03e-14	ADAMTS8	rs139007686	0.00172663	58.4957
ADAMTS8_Q9UP79_OID21502_v1_Oncology_expo_rt.txt	chr11	130577959	11:130447854:C:T:imp:v1	C	T	0.408016	0.998831	33822	ADD	-0.0612726	0.00765361	64.0914	14.9253	NA	1.19e-15	ADAMTS8	rs12146529	0.00189138	64.0876
ADAMTS8_Q9UP79_OID21502_v1_Oncology_expo_rt.txt	chr11	130578683	11:130448578:T:C:imp:v1	T	C	0.07776	1.00226	33822	ADD	0.0910213	0.0140209	42.1441	10.0717	NA	8.48e-11	ADAMTS8	rs57099431	0.0012445	42.1414
ADAMTS8_Q9UP79_OID21502_v1_Oncology_expo_rt.txt	chr11	130586200	11:130456095:C:T:imp:v1	C	T	0.0184737	0.953185	33822	ADD	-0.158564	0.0285957	30.7472	7.53177	NA	2.94e-08	ADAMTS8	rs143062249	0.000908268	30.7455
ADAMTS8_Q9UP79_OID21502_v1_Oncology_expo_rt.txt	chr11	130605604	11:130475499:T:G:imp:v1	T	G	0.0565018	0.965511	33822	ADD	-0.221223	0.0165714	178.214	39.9246	NA	1.19e-40	ADAMTS8	rs80208225	0.00524156	178.204
ADAMTS8_Q9UP79_OID21502_v1_Oncology_expo_rt.txt	chr11	130685472	11:130555367:C:T:imp:v1	C	T	0.307142	0.91172	33822	ADD	-0.0627405	0.00853699	54.0115	12.7004	NA	1.99e-13	ADAMTS8	rs74855020	0.00159439	54.0083
ADAMTS8_Q9UP79_OID21502_v1_Oncology_expo_rt.txt	chr11	130707733	11:130577628:C:T:imp:v1	C	T	0.0857424	0.923089	33822	ADD	-0.107198	0.0139709	58.8734	13.7743	NA	1.68e-14	ADAMTS8	rs112349994	0.00173768	58.8707
ADAMTS8_Q9UP79_OID21502_v1_Oncology_expo_rt.txt	chr11	130820422	11:130690317:T:C:imp:v1	T	C	0.846467	1.00431	33822	ADD	0.072255	0.0104006	48.2635	11.4287	NA	3.73e-12	ADAMTS8	rs1944144	0.00142495	48.2607
ADAMTS8_Q9UP79_OID21502_v1_Oncology_expo_rt.txt	chr11	130832056	11:130701951:C:G:imp:v1	C	G	0.154955	0.977346	33822	ADD	0.0859143	0.0105111	66.8091	15.5242	NA	2.99e-16	ADAMTS8	rs7114924	0.00197142	66.805
ADAMTS8_Q9UP79_OID21502_v1_Oncology_expo_rt.txt	chr11	130838115	11:130708010:C:T:imp:v1	C	T	0.0257229	1.01017	33822	ADD	0.150668	0.0236235	40.6775	9.74584	NA	1.8e-10	ADAMTS8	rs117629941	0.00120125	40.675
ADAMTS8_Q9UP79_OID21502_v1_Oncology_expo_rt.txt	chr11	130843357	11:130713252:C:T:imp:v1	C	T	0.245541	0.987039	33822	ADD	-0.120645	0.00879239	188.281	42.1225	NA	7.54e-43	ADAMTS8	rs10894264	0.00553598	188.269
ADAMTS8_Q9UP79_OID21502_v1_Oncology_expo_rt.txt	chr11	130857427	11:130727322:T:C:imp:v1	T	C	0.034493	0.973264	33822	ADD	0.115937	0.0208788	30.8345	7.5513	NA	2.81e-08	ADAMTS8	rs141915605	0.000910831	30.8324
ADAMTS8_Q9UP79_OID21502_v1_Oncology_expo_rt.txt	chr11	130861118	11:130731013:C:T:imp:v1	C	T	0.0894525	1.00055	33822	ADD	0.0814479	0.0131692	38.2509	9.20616	NA	6.22e-10	ADAMTS8	rs61910786	0.00112967	38.2486
ADAMTS8_Q9UP79_OID21502_v1_Oncology_expo_rt.txt	chr11	130865796	11:130735691:A:T:imp:v1	A	T	0.41643	1.00429	33822	ADD	0.17262	0.00760741	514.885	113.261	NA	5.48e-114	ADAMTS8	rs2282578	0.014995	514.853
ADAMTS8_Q9UP79_OID21502_v1_Oncology_expo_rt.txt	chr11	130917888	11:130787783:G:A:imp:v1	G	A	0.0845278	0.986703	33822	ADD	-0.117943	0.0136032	75.1738	17.3655	NA	4.31e-18	ADAMTS8	rs3763891	0.00221768	75.1686
ADAMTSL2_Q86TH1_OID30370_v1_Cardiometabolic_II_expo_rt.txt	chr9	133495422	9:136360544:C:T:imp:v1	C	T	0.105744	0.988336	33924	ADD	0.0685196	0.0121671	31.7146	7.74818	NA	1.79e-08	ADAMTSL2	rs75396061	0.000933991	31.7125
ADAMTSL2_Q86TH1_OID30370_v1_Cardiometabolic_II_expo_rt.txt	chr9	133532073	9:136397195:C:T:imp:v1	C	T	0.140137	0.975975	33924	ADD	-0.0644516	0.0108378	35.3662	8.56354	NA	2.73e-09	ADAMTSL2	rs11507716	0.00104142	35.3638
ADAMTSL2_Q86TH1_OID30370_v1_Cardiometabolic_II_expo_rt.txt	chr9	133532712	9:136397834:A:G:imp:v1	A	G	0.282086	0.937212	33924	ADD	0.10608	0.0085307	154.632	34.7735	NA	1.68e-35	ADAMTSL2	rs1008250	0.00453749	154.622
ADAMTSL2_Q86TH1_OID30370_v1_Cardiometabolic_II_expo_rt.txt	chr9	133544282	9:136409404:G:C:imp:v1	G	C	0.549682	0.999554	33924	ADD	-0.0549257	0.00746798	54.0935	12.7186	NA	1.91e-13	ADAMTSL2	rs28435854	0.00159201	54.0903
ADAMTSL2_Q86TH1_OID30370_v1_Cardiometabolic_II_expo_rt.txt	chr9	133545284	9:136410406:G:A:imp:v1	G	A	0.927153	0.997276	33924	ADD	-0.129269	0.014319	81.5018	18.7567	NA	1.75e-19	ADAMTSL2	rs9696158	0.0023967	81.4963
ADAMTSL2_Q86TH1_OID30370_v1_Cardiometabolic_II_expo_rt.txt	chr9	133578862	9:136443984:G:A:imp:v1	G	A	0.0233235	0.85691	33924	ADD	0.158706	0.0265859	35.6353	8.62354	NA	2.38e-09	ADAMTSL2	rs62575364	0.00104935	35.6335
ADAMTSL2_Q86TH1_OID30370_v1_Cardiometabolic_II_expo_rt.txt	chr9	133593189	9:136458311:T:G:imp:v1	T	G	0.605544	1.00174	33924	ADD	0.0561301	0.00759762	54.5804	12.8262	NA	1.49e-13	ADAMTSL2	rs9409872	0.00160632	54.5772
ADAMTSL2_Q86TH1_OID30370_v1_Cardiometabolic_II_expo_rt.txt	chr9	133627828	9:136492950:A:G:imp:v1	A	G	0.678689	1.0091	33924	ADD	0.0474839	0.00792094	35.9368	8.69074	NA	2.04e-09	ADAMTSL2	rs2519149	0.00105821	35.9347
ADAMTSL2_Q86TH1_OID30370_v1_Cardiometabolic_II_expo_rt.txt	chr9	133635393	9:136500515:T:C:imp:v1	T	C	0.794008	0.990264	33924	ADD	-0.0580651	0.00923347	39.5459	9.49425	NA	3.2e-10	ADAMTSL2	rs1611115	0.00116436	39.5435
ADAMTSL2_Q86TH1_OID30370_v1_Cardiometabolic_II_expo_rt.txt	chr9	133720519	9:136585641:C:A:imp:v1	C	A	0.370608	1.00244	33924	ADD	-0.055328	0.00768285	51.8615	12.2251	NA	5.96e-13	ADAMTSL2	rs2027962	0.00152642	51.8585
ADAMTSL4_Q6UY14_OID30275_v1_Cardiometabolic_II_expo_rt.txt	chr1	149800334	1:149771890:A:G:imp:v1	A	G	0.911721	0.721605	33042	ADD	-0.0880659	0.015502	32.2731	7.87303	NA	1.34e-08	ADAMTSL4	rs7517103	0.000975775	32.2711
ADAMTSL4_Q6UY14_OID30275_v1_Cardiometabolic_II_expo_rt.txt	chr1	149978036	1:149949971:G:A:imp:v1	G	A	0.0470713	0.993721	33042	ADD	-0.110001	0.0176933	38.6526	9.29555	NA	5.06e-10	ADAMTSL4	rs72692826	0.00116843	38.65
ADAMTSL4_Q6UY14_OID30275_v1_Cardiometabolic_II_expo_rt.txt	chr1	150042628	1:150014600:C:T:imp:v1	C	T	0.0114364	0.879018	33042	ADD	-0.32893	0.0374558	77.1205	17.7936	NA	1.61e-18	ADAMTSL4	rs6664145	0.00232857	77.1157
ADAMTSL4_Q6UY14_OID30275_v1_Cardiometabolic_II_expo_rt.txt	chr1	150072606	1:150044673:G:A:imp:v1	G	A	0.094703	0.989455	33042	ADD	0.0988634	0.0128239	59.4338	13.898	NA	1.26e-14	ADAMTSL4	rs139780328	0.00179549	59.4298
ADAMTSL4_Q6UY14_OID30275_v1_Cardiometabolic_II_expo_rt.txt	chr1	150126555	1:150098679:G:A:imp:v1	G	A	0.0310947	0.896862	33042	ADD	0.236535	0.0227236	108.352	24.6477	NA	2.25e-25	ADAMTSL4	rs79011663	0.0032685	108.345
ADAMTSL4_Q6UY14_OID30275_v1_Cardiometabolic_II_expo_rt.txt	chr1	150134490	1:150106651:T:A:imp:v1	T	A	0.0581786	0.971044	33042	ADD	-0.115112	0.0161898	50.5541	11.9358	NA	1.16e-12	ADAMTSL4	rs61807307	0.00152766	50.5513
ADAMTSL4_Q6UY14_OID30275_v1_Cardiometabolic_II_expo_rt.txt	chr1	150245184	1:150217549:C:CT:imp:v1	C	CT	0.24028	0.845493	33042	ADD	-0.0706331	0.00951233	55.1369	12.9492	NA	1.12e-13	ADAMTSL4	rs200177897	0.00166591	55.1336
ADAMTSL4_Q6UY14_OID30275_v1_Cardiometabolic_II_expo_rt.txt	chr1	150263708	1:150236107:G:A:imp:v1	G	A	0.042219	1.00457	33042	ADD	0.164458	0.0185302	78.7681	18.1559	NA	6.98e-19	ADAMTSL4	rs41304255	0.00237821	78.7632
ADAMTSL4_Q6UY14_OID30275_v1_Cardiometabolic_II_expo_rt.txt	chr1	150275338	1:150247747:A:T:imp:v1	A	T	0.252778	0.951489	33042	ADD	-0.0636934	0.00881035	52.2639	12.3141	NA	4.85e-13	ADAMTSL4	rs4926418	0.00157925	52.2608
ADAMTSL4_Q6UY14_OID30275_v1_Cardiometabolic_II_expo_rt.txt	chr1	150432193	1:150404669:G:A:imp:v1	G	A	0.312174	0.880628	33042	ADD	-0.10278	0.00859235	143.084	32.2492	NA	5.63e-33	ADAMTSL4	rs12117104	0.00431172	143.076
ADAMTSL4_Q6UY14_OID30275_v1_Cardiometabolic_II_expo_rt.txt	chr1	150474982	1:150447458:T:G:imp:v1	T	G	0.0216519	0.981656	33042	ADD	0.367325	0.0259185	200.855	44.8667	NA	1.36e-45	ADAMTSL4	rs141156871	0.00604203	200.842
ADAMTSL4_Q6UY14_OID30275_v1_Cardiometabolic_II_expo_rt.txt	chr1	150531587	1:150504063:T:G:imp:v1	T	G	0.219142	1.00262	33042	ADD	-0.136258	0.00901627	228.387	50.873	NA	1.34e-51	ADAMTSL4	rs6698291	0.00686455	228.373
ADAMTSL4_Q6UY14_OID30275_v1_Cardiometabolic_II_expo_rt.txt	chr1	150533813	1:150506289:C:T:imp:v1	C	T	0.0119237	0.887389	33042	ADD	-0.209779	0.0365146	33.0059	8.03677	NA	9.19e-09	ADAMTSL4	rs114930931	0.000997909	33.0039
ADAMTSL4_Q6UY14_OID30275_v1_Cardiometabolic_II_expo_rt.txt	chr1	150538184	1:150510660:C:T:imp:v1	C	T	0.731327	1.01215	33042	ADD	-0.127996	0.0083739	233.635	52.0174	NA	9.61e-53	ADAMTSL4	rs6693567	0.00702119	233.621
ADAMTSL4_Q6UY14_OID30275_v1_Cardiometabolic_II_expo_rt.txt	chr1	150552949	1:150525425:G:A:imp:v1	G	A	0.036713	0.963772	33042	ADD	-0.470612	0.02023	541.172	118.979	NA	1.05e-119	ADAMTSL4	rs41317513	0.0161143	541.138
ADAMTSL4_Q6UY14_OID30275_v1_Cardiometabolic_II_expo_rt.txt	chr1	150558072	1:150530548:C:G:imp:v1	C	G	0.0309303	0.991306	33042	ADD	-0.198932	0.021673	84.2497	19.3605	NA	4.36e-20	ADAMTSL4	rs56228576	0.00254331	84.2452
ADAMTSL4_Q6UY14_OID30275_v1_Cardiometabolic_II_expo_rt.txt	chr1	150642059	1:150614535:G:A:imp:v1	G	A	0.348122	1.00623	33042	ADD	0.188563	0.00781546	582.11	127.885	NA	1.3e-128	ADAMTSL4	rs12067556	0.0173122	582.073
ADAMTSL4_Q6UY14_OID30275_v1_Cardiometabolic_II_expo_rt.txt	chr1	150746304	1:150718780:G:C:imp:v1	G	C	0.0341507	0.960395	33042	ADD	0.18693	0.0209857	79.3434	18.2823	NA	5.22e-19	ADAMTSL4	rs72704613	0.00239554	79.3386
ADAMTSL4_Q6UY14_OID30275_v1_Cardiometabolic_II_expo_rt.txt	chr1	150867222	1:150839698:C:CA:imp:v1	C	CA	0.302825	0.966041	33042	ADD	0.13568	0.00827335	268.948	59.7159	NA	1.92e-60	ADAMTSL4	rs10305663	0.00807387	268.932
ADAMTSL4_Q6UY14_OID30275_v1_Cardiometabolic_II_expo_rt.txt	chr1	150948109	1:150920585:C:A:imp:v1	C	A	0.0323044	0.961335	33042	ADD	-0.187065	0.021551	75.3444	17.403	NA	3.95e-18	ADAMTSL4	rs72704700	0.00227507	75.3397
ADAMTSL4_Q6UY14_OID30275_v1_Cardiometabolic_II_expo_rt.txt	chr1	151001038	1:150973514:G:A:imp:v1	G	A	0.858699	0.991121	33042	ADD	0.0822183	0.0107743	58.2317	13.6327	NA	2.33e-14	ADAMTSL4	rs771203	0.00175925	58.2281
ADAMTSL4_Q6UY14_OID30275_v1_Cardiometabolic_II_expo_rt.txt	chr1	151027584	1:151000060:A:AT:imp:v1	A	AT	0.410589	0.795927	33042	ADD	0.0624666	0.00851112	53.8669	12.6685	NA	2.15e-13	ADAMTSL4	rs201930993	0.0016276	53.8637
ADAMTSL4_Q6UY14_OID30275_v1_Cardiometabolic_II_expo_rt.txt	chr1	151027707	1:151000183:G:A:imp:v1	G	A	0.0975777	0.982537	33042	ADD	-0.104448	0.0127026	67.6109	15.7008	NA	1.99e-16	ADAMTSL4	rs35550545	0.00204202	67.6065
ADAMTSL4_Q6UY14_OID30275_v1_Cardiometabolic_II_expo_rt.txt	chr1	151027963	1:151000439:G:A:imp:v1	G	A	0.0188368	0.892398	33042	ADD	-0.201908	0.0290934	48.1633	11.4065	NA	3.92e-12	ADAMTSL4	rs76104463	0.00145552	48.1606
ADAMTSL4_Q6UY14_OID30275_v1_Cardiometabolic_II_expo_rt.txt	chr1	151142541	1:151115017:G:A:imp:v1	G	A	0.0406906	0.976966	33042	ADD	-0.191829	0.0191264	100.591	22.9465	NA	1.13e-23	ADAMTSL4	rs74949844	0.00303512	100.586
ADAMTSL4_Q6UY14_OID30275_v1_Cardiometabolic_II_expo_rt.txt	chr1	151220702	1:151193178:C:G:imp:v1	C	G	0.0215094	0.993041	33042	ADD	-0.337518	0.0258407	170.602	38.2624	NA	5.47e-39	ADAMTSL4	rs4587566	0.00513668	170.592
ADAMTSL4_Q6UY14_OID30275_v1_Cardiometabolic_II_expo_rt.txt	chr1	151225727	1:151198203:C:T:imp:v1	C	T	0.014139	0.972602	33042	ADD	0.20756	0.0320815	41.8579	10.0081	NA	9.82e-11	ADAMTSL4	rs148106641	0.00126521	41.8554
ADAMTSL4_Q6UY14_OID30275_v1_Cardiometabolic_II_expo_rt.txt	chr1	151258970	1:151231446:T:G:imp:v1	T	G	0.111257	0.995676	33042	ADD	0.111184	0.0119069	87.1942	20.0071	NA	9.84e-21	ADAMTSL4	rs140309773	0.00263194	87.1888
ADAMTSL5_Q6ZMM2_OID30355_v1_Cardiometabolic_II_expo_rt.txt	chr19	1347766	19:1347765:G:A:imp:v1	G	A	0.479044	0.866558	33942	ADD	0.0467784	0.00807512	33.5578	8.16003	NA	6.92e-09	ADAMTSL5	rs35144841	0.000987703	33.5558
ADAMTSL5_Q6ZMM2_OID30355_v1_Cardiometabolic_II_expo_rt.txt	chr19	1398144	19:1398143:C:G:imp:v1	C	G	0.10744	1.00483	33942	ADD	-0.0960293	0.0121133	62.8466	14.6508	NA	2.23e-15	ADAMTSL5	rs11670139	0.00184817	62.843
ADAMTSL5_Q6ZMM2_OID30355_v1_Cardiometabolic_II_expo_rt.txt	chr19	1415702	19:1415701:G:A:imp:v1	G	A	0.0552413	0.995722	33942	ADD	-0.143236	0.0164732	75.6053	17.4604	NA	3.46e-18	ADAMTSL5	rs3786981	0.00222251	75.6002
ADAMTSL5_Q6ZMM2_OID30355_v1_Cardiometabolic_II_expo_rt.txt	chr19	1441959	19:1441958:A:C:imp:v1	A	C	0.0500906	0.966779	33942	ADD	0.169541	0.0175146	93.7021	21.4356	NA	3.67e-22	ADAMTSL5	rs79983218	0.00275305	93.6965
ADAMTSL5_Q6ZMM2_OID30355_v1_Cardiometabolic_II_expo_rt.txt	chr19	1451430	19:1451429:C:T:imp:v1	C	T	0.0202223	0.799006	33942	ADD	0.276716	0.0298469	85.9548	19.735	NA	1.84e-20	ADAMTSL5	rs143741153	0.00252601	85.9497
ADAMTSL5_Q6ZMM2_OID30355_v1_Cardiometabolic_II_expo_rt.txt	chr19	1452523	19:1452522:C:A:imp:v1	C	A	0.0523098	0.998291	33942	ADD	0.154231	0.0168857	83.4269	19.1797	NA	6.61e-20	ADAMTSL5	rs11671418	0.00245189	83.4218
ADAMTSL5_Q6ZMM2_OID30355_v1_Cardiometabolic_II_expo_rt.txt	chr19	1452816	19:1452815:C:G:imp:v1	C	G	0.559719	0.962371	33942	ADD	-0.0702884	0.00771786	82.942	19.0732	NA	8.45e-20	ADAMTSL5	rs265297	0.00243768	82.9369
ADAMTSL5_Q6ZMM2_OID30355_v1_Cardiometabolic_II_expo_rt.txt	chr19	1457003	19:1457002:G:C:imp:v1	G	C	0.0155734	0.714922	33942	ADD	-0.243405	0.0358809	46.0183	10.9313	NA	1.17e-11	ADAMTSL5	rs143870588	0.00135396	46.0158
ADAMTSL5_Q6ZMM2_OID30355_v1_Cardiometabolic_II_expo_rt.txt	chr19	1476599	19:1476598:C:A:imp:v1	C	A	0.028917	1.00799	33942	ADD	0.206278	0.0223357	85.2918	19.5893	NA	2.57e-20	ADAMTSL5	rs117544888	0.00250657	85.2867
ADAMTSL5_Q6ZMM2_OID30355_v1_Cardiometabolic_II_expo_rt.txt	chr19	1480409	19:1480408:G:A:imp:v1	G	A	0.260881	0.860632	33942	ADD	-0.0778427	0.00922048	71.2735	16.5073	NA	3.11e-17	ADAMTSL5	rs78066271	0.00209546	71.2694
ADAMTSL5_Q6ZMM2_OID30355_v1_Cardiometabolic_II_expo_rt.txt	chr19	1484774	19:1484773:T:C:imp:v1	T	C	0.0212295	0.873651	33942	ADD	-0.159564	0.0278817	32.7516	7.97997	NA	1.05e-08	ADAMTSL5	rs142681305	0.000963996	32.7496
ADAMTSL5_Q6ZMM2_OID30355_v1_Cardiometabolic_II_expo_rt.txt	chr19	1486543	19:1486542:G:A:imp:v1	G	A	0.032457	0.864632	33942	ADD	0.147093	0.0227874	41.6673	9.96575	NA	1.08e-10	ADAMTSL5	rs144971613	0.00122609	41.6648
ADAMTSL5_Q6ZMM2_OID30355_v1_Cardiometabolic_II_expo_rt.txt	chr19	1488756	19:1488755:C:T:imp:v1	C	T	0.945504	0.823962	33942	ADD	0.123309	0.018236	45.7221	10.8656	NA	1.36e-11	ADAMTSL5	rs791463	0.00134527	45.7198
ADAMTSL5_Q6ZMM2_OID30355_v1_Cardiometabolic_II_expo_rt.txt	chr19	1488792	19:1488791:G:A:imp:v1	G	A	0.0483246	0.86524	33942	ADD	0.247608	0.0188308	172.898	38.7638	NA	1.72e-39	ADAMTSL5	rs4133069	0.00506813	172.889
ADAMTSL5_Q6ZMM2_OID30355_v1_Cardiometabolic_II_expo_rt.txt	chr19	1489022	19:1489021:A:T:imp:v1	A	T	0.0373126	0.870834	33942	ADD	-0.152144	0.0212483	51.2701	12.0942	NA	8.05e-13	ADAMTSL5	rs117170328	0.00150823	51.2667
ADAMTSL5_Q6ZMM2_OID30355_v1_Cardiometabolic_II_expo_rt.txt	chr19	1492846	19:1492845:G:A:imp:v1	G	A	0.0375857	0.966621	33942	ADD	-0.320523	0.0200844	254.683	56.6066	NA	2.47e-57	ADAMTSL5	rs34157870	0.00744761	254.668
ADAMTSL5_Q6ZMM2_OID30355_v1_Cardiometabolic_II_expo_rt.txt	chr19	1501314	19:1501313:G:A:imp:v1	G	A	0.0333836	0.96042	33942	ADD	0.207953	0.021337	94.9872	21.7176	NA	1.92e-22	ADAMTSL5	rs67449295	0.0027907	94.9813
ADAMTSL5_Q6ZMM2_OID30355_v1_Cardiometabolic_II_expo_rt.txt	chr19	1505875	19:1505874:T:C:imp:v1	T	C	0.441194	0.99153	33942	ADD	0.325288	0.00759597	1833.88	399.952	NA	0	ADAMTSL5	rs197198	0.0512601	1833.77
ADAMTSL5_Q6ZMM2_OID30355_v1_Cardiometabolic_II_expo_rt.txt	chr19	1506449	19:1506448:T:A:imp:v1	T	A	0.0481664	0.956387	33942	ADD	0.320633	0.0179439	319.288	70.6839	NA	2.07e-71	ADAMTSL5	rs75714435	0.00931921	319.269
ADAMTSL5_Q6ZMM2_OID30355_v1_Cardiometabolic_II_expo_rt.txt	chr19	1507586	19:1507585:C:A:imp:v1	C	A	0.0108444	0.845889	33942	ADD	-0.334478	0.0394382	71.9286	16.6515	NA	2.23e-17	ADAMTSL5	rs138308068	0.00211468	71.9243
ADAMTSL5_Q6ZMM2_OID30355_v1_Cardiometabolic_II_expo_rt.txt	chr19	1508738	19:1508737:C:T:imp:v1	C	T	0.142501	0.85079	33942	ADD	0.0710759	0.0116548	37.1908	8.97014	NA	1.07e-09	ADAMTSL5	rs55810939	0.00109452	37.1886
ADAMTSL5_Q6ZMM2_OID30355_v1_Cardiometabolic_II_expo_rt.txt	chr19	1511436	19:1511435:G:C:imp:v1	G	C	0.168552	0.759317	33942	ADD	0.225257	0.0115148	382.688	84.4902	NA	3.23e-85	ADAMTSL5	rs12976420	0.011149	382.665
ADAMTSL5_Q6ZMM2_OID30355_v1_Cardiometabolic_II_expo_rt.txt	chr19	1512964	19:1512963:G:A:imp:v1	G	A	0.13805	0.782156	33942	ADD	0.0848785	0.0123136	47.5141	11.2627	NA	5.46e-12	ADAMTSL5	rs7258839	0.00139791	47.5116
ADAMTSL5_Q6ZMM2_OID30355_v1_Cardiometabolic_II_expo_rt.txt	chr19	1513104	19:1513103:C:A:imp:v1	C	A	0.01043	0.780017	33942	ADD	-0.473449	0.0418516	127.974	28.9442	NA	1.14e-29	ADAMTSL5	rs186352768	0.00375621	127.967
ADAMTSL5_Q6ZMM2_OID30355_v1_Cardiometabolic_II_expo_rt.txt	chr19	1519610	19:1519609:A:G:imp:v1	A	G	0.363827	0.936802	33942	ADD	-0.0494906	0.00806582	37.6486	9.07208	NA	8.47e-10	ADAMTSL5	rs12972507	0.00110797	37.6463
ADAMTSL5_Q6ZMM2_OID30355_v1_Cardiometabolic_II_expo_rt.txt	chr19	1523129	19:1523128:G:A:imp:v1	G	A	0.016375	0.94796	33942	ADD	-0.176758	0.0304069	33.792	8.21232	NA	6.13e-09	ADAMTSL5	rs144366747	0.00099459	33.79
ADAMTSL5_Q6ZMM2_OID30355_v1_Cardiometabolic_II_expo_rt.txt	chr19	1533521	19:1533520:T:C:imp:v1	T	C	0.247375	0.960612	33942	ADD	-0.0621789	0.00888265	49.0006	11.592	NA	2.56e-12	ADAMTSL5	rs11666500	0.00144157	48.9977
ADAMTSL5_Q6ZMM2_OID30355_v1_Cardiometabolic_II_expo_rt.txt	chr19	1535350	19:1535349:G:A:imp:v1	G	A	0.585767	0.979057	33942	ADD	-0.0565768	0.00771254	53.8123	12.6564	NA	2.21e-13	ADAMTSL5	rs265281	0.00158291	53.8092
ADAMTSL5_Q6ZMM2_OID30355_v1_Cardiometabolic_II_expo_rt.txt	chr19	1560533	19:1560532:G:A:imp:v1	G	A	0.0129779	0.785781	33942	ADD	0.208808	0.037435	31.1129	7.61359	NA	2.43e-08	ADAMTSL5	rs118109350	0.000915806	31.1109
ADAMTSL5_Q6ZMM2_OID30355_v1_Cardiometabolic_II_expo_rt.txt	chr19	1576306	19:1576305:C:T:imp:v1	C	T	0.033665	0.968472	33942	ADD	0.132313	0.0211601	39.0992	9.39491	NA	4.03e-10	ADAMTSL5	rs117937248	0.00115062	39.0971
ADAMTSL5_Q6ZMM2_OID30355_v1_Cardiometabolic_II_expo_rt.txt	chr19	1645676	19:1645675:C:A:imp:v1	C	A	0.0920433	0.946861	33942	ADD	0.0896586	0.0133531	45.0838	10.724	NA	1.89e-11	ADAMTSL5	rs62130071	0.0013265	45.0811
ADA_P00813_OID20645_v1_Inflammation_expo_rt.txt	chr20	44052171	20:42680811:G:C:imp:v1	G	C	0.755707	0.943743	34049	ADD	-0.0553157	0.00892528	38.4108	9.24174	NA	5.73e-10	ADA	rs6031328	0.00112683	38.4085
ADA_P00813_OID20645_v1_Inflammation_expo_rt.txt	chr20	44089696	20:42718336:T:G:imp:v1	T	G	0.228216	1.00565	34049	ADD	-0.0681544	0.00885968	59.1768	13.8413	NA	1.44e-14	ADA	rs8114336	0.00173497	59.1734
ADA_P00813_OID20645_v1_Inflammation_expo_rt.txt	chr20	44188205	20:42816845:G:A:imp:v1	G	A	0.286798	0.998448	34049	ADD	-0.0679562	0.00824761	67.8894	15.7621	NA	1.73e-16	ADA	rs6103669	0.00198991	67.8854
ADA_P00813_OID20645_v1_Inflammation_expo_rt.txt	chr20	44220660	20:42849300:G:A:imp:v1	G	A	0.525057	0.985568	34049	ADD	-0.0678218	0.00751611	81.4239	18.7396	NA	1.82e-19	ADA	rs4812802	0.00238567	81.4192
ADA_P00813_OID20645_v1_Inflammation_expo_rt.txt	chr20	44300228	20:42928868:A:G:imp:v1	A	G	0.0320268	0.98918	34049	ADD	0.314553	0.0212821	218.454	48.7064	NA	1.97e-49	ADA	rs117077082	0.00637495	218.441
ADA_P00813_OID20645_v1_Inflammation_expo_rt.txt	chr20	44300880	20:42929520:A:T:imp:v1	A	T	0.0340412	0.992157	34049	ADD	0.217358	0.0206335	110.969	25.2212	NA	6.01e-26	ADA	rs62206054	0.00324854	110.963
ADA_P00813_OID20645_v1_Inflammation_expo_rt.txt	chr20	44311053	20:42939693:C:T:imp:v1	C	T	0.0146553	0.99733	34049	ADD	0.304371	0.0310487	96.0992	21.9615	NA	1.09e-22	ADA	rs148377517	0.00281444	96.0935
ADA_P00813_OID20645_v1_Inflammation_expo_rt.txt	chr20	44334139	20:42962779:G:A:imp:v1	G	A	0.0195749	0.938992	34049	ADD	-0.151448	0.0277562	29.7719	7.31337	NA	4.86e-08	ADA	rs149196749	0.000873621	29.7702
ADA_P00813_OID20645_v1_Inflammation_expo_rt.txt	chr20	44354698	20:42983338:G:T:imp:v1	G	T	0.142006	1.00134	34049	ADD	0.0869705	0.0106692	66.4481	15.4446	NA	3.59e-16	ADA	rs74749453	0.00194773	66.4438
ADA_P00813_OID20645_v1_Inflammation_expo_rt.txt	chr20	44387025	20:43015665:A:G:imp:v1	A	G	0.0131979	0.939453	34049	ADD	0.518371	0.0336845	236.821	52.7122	NA	1.94e-53	ADA	rs111477402	0.00690727	236.808
ADA_P00813_OID20645_v1_Inflammation_expo_rt.txt	chr20	44388273	20:43016913:T:G:imp:v1	T	G	0.305888	0.907232	34049	ADD	0.060969	0.00849062	51.5631	12.1591	NA	6.93e-13	ADA	rs8118353	0.00151209	51.5601
ADA_P00813_OID20645_v1_Inflammation_expo_rt.txt	chr20	44400645	20:43029285:A:C:imp:v1	A	C	0.623822	0.991955	34049	ADD	-0.0726866	0.00772272	88.5867	20.3129	NA	4.87e-21	ADA	rs1800963	0.00259499	88.5814
ADA_P00813_OID20645_v1_Inflammation_expo_rt.txt	chr20	44408373	20:43037013:G:A:imp:v1	G	A	0.0822491	1.00298	34049	ADD	-0.0946944	0.0135469	48.8621	11.5613	NA	2.75e-12	ADA	rs11574730	0.00143298	48.8588
ADA_P00813_OID20645_v1_Inflammation_expo_rt.txt	chr20	44412491	20:43041131:G:A:imp:v1	G	A	0.401538	0.870972	34049	ADD	-0.096633	0.00814289	140.83	31.7562	NA	1.75e-32	ADA	rs6031590	0.00411905	140.821
ADA_P00813_OID20645_v1_Inflammation_expo_rt.txt	chr20	44420936	20:43049576:A:G:imp:v1	A	G	0.014739	0.940885	34049	ADD	-0.233379	0.0318749	53.6074	12.6111	NA	2.45e-13	ADA	rs117113154	0.00157195	53.6044
ADA_P00813_OID20645_v1_Inflammation_expo_rt.txt	chr20	44432031	20:43060671:G:C:imp:v1	G	C	0.0964027	0.932965	34049	ADD	0.2019	0.0130713	238.582	53.0961	NA	8.01e-54	ADA	rs3212211	0.00695822	238.567
ADA_P00813_OID20645_v1_Inflammation_expo_rt.txt	chr20	44436143	20:43064783:C:A:imp:v1	C	A	0.602396	0.930172	34049	ADD	0.0856192	0.00789495	117.61	26.6755	NA	2.11e-27	ADA	rs11905144	0.00344224	117.603
ADA_P00813_OID20645_v1_Inflammation_expo_rt.txt	chr20	44446437	20:43075077:T:C:imp:v1	T	C	0.978363	0.892908	34049	ADD	0.211007	0.0270927	60.6581	14.1681	NA	6.79e-15	ADA	rs911359	0.00177833	60.6546
ADA_P00813_OID20645_v1_Inflammation_expo_rt.txt	chr20	44446797	20:43075437:T:C:imp:v1	T	C	0.243666	0.976981	34049	ADD	0.287797	0.00878449	1073.34	234.687	NA	2.06e-235	ADA	rs2093248	0.0305602	1073.28
ADA_P00813_OID20645_v1_Inflammation_expo_rt.txt	chr20	44448880	20:43077520:G:A:imp:v1	G	A	0.128563	0.957936	34049	ADD	-0.103504	0.0113717	82.845	19.0519	NA	8.87e-20	ADA	rs56115289	0.00242719	82.8396
ADA_P00813_OID20645_v1_Inflammation_expo_rt.txt	chr20	44455696	20:43084336:C:T:imp:v1	C	T	0.0195759	0.966879	34049	ADD	1.08386	0.0273495	1570.54	342.735	NA	0	ADA	rs117371410	0.044092	1570.44
ADA_P00813_OID20645_v1_Inflammation_expo_rt.txt	chr20	44464374	20:43093014:T:C:imp:v1	T	C	0.12917	0.934598	34049	ADD	-0.117363	0.0114918	104.301	23.76	NA	1.74e-24	ADA	rs11697981	0.00305389	104.294
ADA_P00813_OID20645_v1_Inflammation_expo_rt.txt	chr20	44478952	20:43107592:G:T:imp:v1	G	T	0.0387824	0.971961	34049	ADD	1.03292	0.0195805	2782.81	606.1	NA	0	ADA	rs112239935	0.0755549	2782.66
ADA_P00813_OID20645_v1_Inflammation_expo_rt.txt	chr20	44526112	20:43154753:G:A:imp:v1	G	A	0.0413841	0.990344	34049	ADD	-0.259748	0.0188003	190.887	42.6913	NA	2.04e-43	ADA	rs117572787	0.00557497	190.875
ADA_P00813_OID20645_v1_Inflammation_expo_rt.txt	chr20	44539020	20:43167661:C:T:imp:v1	C	T	0.1162	0.996725	34049	ADD	-0.182369	0.0116474	245.157	54.5296	NA	2.95e-55	ADA	rs11907483	0.00714865	245.142
ADA_P00813_OID20645_v1_Inflammation_expo_rt.txt	chr20	44542517	20:43171158:G:A:imp:v1	G	A	0.0346413	1.00364	34049	ADD	-0.1543	0.0203314	57.5968	13.4925	NA	3.22e-14	ADA	rs74414692	0.00168873	57.5933
ADA_P00813_OID20645_v1_Inflammation_expo_rt.txt	chr20	44544064	20:43172705:CA:C:imp:v1	CA	C	0.172142	0.925154	34049	ADD	-0.096499	0.0102605	88.4514	20.2832	NA	5.21e-21	ADA	rs78198078	0.00259106	88.447
ADA_P00813_OID20645_v1_Inflammation_expo_rt.txt	chr20	44607097	20:43235738:A:G:imp:v1	A	G	0.0821757	1.00275	34049	ADD	-0.132492	0.0135505	95.602	21.8524	NA	1.4e-22	ADA	rs78824799	0.00279993	95.5968
ADA_P00813_OID20645_v1_Inflammation_expo_rt.txt	chr20	44632773	20:43261414:A:G:imp:v1	A	G	0.0120905	0.950702	34049	ADD	0.288819	0.0349585	68.2568	15.8431	NA	1.44e-16	ADA	rs58238844	0.00200065	68.2528
ADA_P00813_OID20645_v1_Inflammation_expo_rt.txt	chr20	44636050	20:43264691:C:G:imp:v1	C	G	0.737682	0.947078	34049	ADD	-0.256394	0.00870546	867.423	189.926	NA	1.19e-190	ADA	rs1799880	0.0248429	867.375
ADA_P00813_OID20645_v1_Inflammation_expo_rt.txt	chr20	44637031	20:43265672:C:T:imp:v1	C	T	0.012621	0.842334	34049	ADD	-0.267371	0.0363578	54.0796	12.7155	NA	1.93e-13	ADA	rs147923957	0.00158577	54.0764
ADA_P00813_OID20645_v1_Inflammation_expo_rt.txt	chr20	44642751	20:43271392:C:G:imp:v1	C	G	0.245058	0.994327	34049	ADD	0.303169	0.00868814	1217.64	266.047	NA	8.97e-267	ADA	rs406383	0.0345265	1217.56
ADA_P00813_OID20645_v1_Inflammation_expo_rt.txt	chr20	44647728	20:43276369:C:T:imp:v1	C	T	0.0267066	0.853917	34049	ADD	-0.213298	0.0250123	72.7222	16.8261	NA	1.49e-17	ADA	rs140893297	0.00213125	72.7178
ADA_P00813_OID20645_v1_Inflammation_expo_rt.txt	chr20	44651586	20:43280227:C:T:imp:v1	C	T	0.0517343	0.964002	34049	ADD	0.172698	0.017136	101.568	23.1608	NA	6.91e-24	ADA	rs73598374	0.00297411	101.562
ADA_P00813_OID20645_v1_Inflammation_expo_rt.txt	chr20	44651708	20:43280349:C:T:imp:v1	C	T	0.0615788	0.966168	34049	ADD	-0.237987	0.0157779	227.514	50.6826	NA	2.08e-51	ADA	rs36216718	0.00663761	227.501
ADA_P00813_OID20645_v1_Inflammation_expo_rt.txt	chr20	44656051	20:43284692:G:A:imp:v1	G	A	0.0496086	0.960816	34049	ADD	0.10356	0.0174988	35.0237	8.48717	NA	3.26e-09	ADA	rs140466016	0.00102758	35.0221
ADA_P00813_OID20645_v1_Inflammation_expo_rt.txt	chr20	44663855	20:43292496:CA:C:imp:v1	CA	C	0.640659	0.738891	34049	ADD	-0.1101	0.00903437	148.518	33.437	NA	3.66e-34	ADA	rs79887936	0.00434294	148.509
ADA_P00813_OID20645_v1_Inflammation_expo_rt.txt	chr20	44665428	20:43294069:C:T:imp:v1	C	T	0.0288244	0.945166	34049	ADD	0.348613	0.0229063	231.62	51.578	NA	2.64e-52	ADA	rs146284601	0.00675661	231.607
ADA_P00813_OID20645_v1_Inflammation_expo_rt.txt	chr20	44670354	20:43298995:A:G:imp:v1	A	G	0.0282076	0.925079	34049	ADD	0.186939	0.0233985	63.8296	14.8676	NA	1.36e-15	ADA	rs117922695	0.00187114	63.8261
ADA_P00813_OID20645_v1_Inflammation_expo_rt.txt	chr20	44672026	20:43300667:G:A:imp:v1	G	A	0.318246	0.877751	34049	ADD	0.177327	0.00853935	431.222	95.0551	NA	8.81e-96	ADA	rs12479560	0.0125063	431.196
ADA_P00813_OID20645_v1_Inflammation_expo_rt.txt	chr20	44676701	20:43305342:C:T:imp:v1	C	T	0.106658	0.951197	34049	ADD	0.17369	0.0123734	197.047	44.0358	NA	9.21e-45	ADA	rs6124657	0.00575388	197.036
ADA_P00813_OID20645_v1_Inflammation_expo_rt.txt	chr20	44680826	20:43309467:T:A:imp:v1	T	A	0.0846346	0.819672	34049	ADD	-0.16746	0.0147868	128.255	29.0056	NA	9.87e-30	ADA	rs6103822	0.00375264	128.247
ADA_P00813_OID20645_v1_Inflammation_expo_rt.txt	chr20	44683006	20:43311647:G:A:imp:v1	G	A	0.0252618	0.937981	34049	ADD	0.246217	0.0245208	100.824	22.9978	NA	1.01e-23	ADA	rs62204569	0.00295242	100.819
ADA_P00813_OID20645_v1_Inflammation_expo_rt.txt	chr20	44684616	20:43313257:C:T:imp:v1	C	T	0.0177245	1.00051	34049	ADD	-0.186108	0.0282358	43.4439	10.3602	NA	4.36e-11	ADA	rs74531211	0.0012743	43.4415
ADA_P00813_OID20645_v1_Inflammation_expo_rt.txt	chr20	44697510	20:43326151:T:A:imp:v1	T	A	0.0274202	0.912636	34049	ADD	0.157504	0.023883	43.4915	10.3708	NA	4.26e-11	ADA	rs117296576	0.00127569	43.489
ADA_P00813_OID20645_v1_Inflammation_expo_rt.txt	chr20	44703100	20:43331741:C:T:imp:v1	C	T	0.233336	0.840494	34049	ADD	-0.11441	0.00960783	141.801	31.9687	NA	1.07e-32	ADA	rs12329448	0.00414733	141.792
ADA_P00813_OID20645_v1_Inflammation_expo_rt.txt	chr20	44705833	20:43334474:C:A:imp:v1	C	A	0.0753982	1.01125	34049	ADD	0.119083	0.0140358	71.9819	16.6632	NA	2.17e-17	ADA	rs6031752	0.00210962	71.978
ADA_P00813_OID20645_v1_Inflammation_expo_rt.txt	chr20	44713387	20:43342028:A:C:imp:v1	A	C	0.0293808	0.934189	34049	ADD	-0.21483	0.0228301	88.5474	20.3042	NA	4.96e-21	ADA	rs75918137	0.00259383	88.5419
ADA_P00813_OID20645_v1_Inflammation_expo_rt.txt	chr20	44720576	20:43349217:T:C:imp:v1	T	C	0.684337	0.998539	34049	ADD	-0.0487882	0.00802416	36.9684	8.9206	NA	1.2e-09	ADA	rs4812858	0.00108456	36.9662
ADA_P00813_OID20645_v1_Inflammation_expo_rt.txt	chr20	44735667	20:43364308:A:G:imp:v1	A	G	0.450265	1.0006	34049	ADD	-0.0455022	0.00748725	36.9335	8.91283	NA	1.22e-09	ADA	rs13043441	0.00108354	36.9313
ADA_P00813_OID20645_v1_Inflammation_expo_rt.txt	chr20	44843508	20:43472149:A:G:imp:v1	A	G	0.0141952	0.934358	34049	ADD	0.325862	0.0325832	100.018	22.8211	NA	1.51e-23	ADA	rs142432299	0.00292888	100.013
ADA_P00813_OID20645_v1_Inflammation_expo_rt.txt	chr20	44976399	20:43605040:G:A:imp:v1	G	A	0.102382	1.00738	34049	ADD	0.0796897	0.0122473	42.3371	10.1145	NA	7.68e-11	ADA	rs75508136	0.00124188	42.3349
ADA_P00813_OID20645_v1_Inflammation_expo_rt.txt	chr20	45167878	20:43796519:C:T:imp:v1	C	T	0.300581	0.991736	34049	ADD	-0.0501901	0.00815973	37.8342	9.1134	NA	7.7e-10	ADA	rs4375934	0.00110994	37.832
ADD1_P35611_OID30655_v1_Inflammation_II_expo_rt.txt	chr4	2764943	4:2766670:C:A:imp:v1	C	A	0.290912	0.990416	33187	ADD	0.0453627	0.00805376	31.725	7.7505	NA	1.78e-08	ADD1	rs79754580	0.000955031	31.723
ADD1_P35611_OID30655_v1_Inflammation_II_expo_rt.txt	chr4	2768124	4:2769851:T:C:imp:v1	T	C	0.282494	0.975641	33187	ADD	-0.0807723	0.00818654	97.3474	22.2353	NA	5.82e-23	ADD1	rs57989672	0.00292472	97.3415
ADD1_P35611_OID30655_v1_Inflammation_II_expo_rt.txt	chr4	2859363	4:2861090:G:A:imp:v1	G	A	0.188989	0.985988	33187	ADD	0.0544935	0.00936062	33.8906	8.23434	NA	5.83e-09	ADD1	rs12509447	0.00102016	33.8886
ADD1_P35611_OID30655_v1_Inflammation_II_expo_rt.txt	chr4	2861675	4:2863402:C:T:imp:v1	C	T	0.011808	0.933249	33187	ADD	-0.190692	0.034871	29.9044	7.34305	NA	4.54e-08	ADD1	rs78477256	0.000900279	29.9027
ADD1_P35611_OID30655_v1_Inflammation_II_expo_rt.txt	chr4	2911924	4:2913651:G:A:imp:v1	G	A	0.280583	0.997314	33187	ADD	0.067593	0.00811312	69.4108	16.0972	NA	7.99e-17	ADD1	rs17834203	0.00208714	69.4067
ADD1_P35611_OID30655_v1_Inflammation_II_expo_rt.txt	chr4	2916247	4:2917974:G:C:imp:v1	G	C	0.186454	1.00434	33187	ADD	-0.17659	0.00933079	358.173	79.1526	NA	7.04e-80	ADD1	rs1263339	0.0106774	358.154
ADD1_P35611_OID30655_v1_Inflammation_II_expo_rt.txt	chr4	2927537	4:2929264:C:A:imp:v1	C	A	0.010033	0.981769	33187	ADD	-0.30857	0.0368577	70.0889	16.2465	NA	5.67e-17	ADD1	rs112669105	0.0021075	70.0849
ADD1_P35611_OID30655_v1_Inflammation_II_expo_rt.txt	chr4	3297429	4:3299156:C:A:imp:v1	C	A	0.93728	0.938721	33187	ADD	0.119191	0.0155008	59.1263	13.8301	NA	1.48e-14	ADD1	rs3129311	0.00177843	59.1225
ADGRB3_O60242_OID20974_v1_Neurology_expo_rt.txt	chr6	67735684	6:68445577:G:A:imp:v1	G	A	0.355173	0.990932	33372	ADD	0.0477915	0.00803077	35.415	8.57441	NA	2.66e-09	ADGRB3	rs13219398	0.00106009	35.4129
ADGRB3_O60242_OID20974_v1_Neurology_expo_rt.txt	chr6	67821428	6:68531321:C:T:imp:v1	C	T	0.0292934	0.876049	33372	ADD	-0.284798	0.0241989	138.511	31.2491	NA	5.64e-32	ADGRB3	rs148200216	0.00413334	138.502
ADGRB3_O60242_OID20974_v1_Neurology_expo_rt.txt	chr6	67837709	6:68547602:A:G:imp:v1	A	G	0.662209	0.855094	33372	ADD	-0.0509152	0.00873627	33.9659	8.25115	NA	5.61e-09	ADGRB3	rs1533324	0.00101676	33.9638
ADGRB3_O60242_OID20974_v1_Neurology_expo_rt.txt	chr6	67873514	6:68583407:TG:T:imp:v1	TG	T	0.207616	0.828884	33372	ADD	0.0645169	0.0103398	38.9332	9.35798	NA	4.39e-10	ADGRB3	rs368294399	0.00116529	38.9311
ADGRB3_O60242_OID20974_v1_Neurology_expo_rt.txt	chr6	67880447	6:68590340:T:G:imp:v1	T	G	0.0153188	0.843617	33372	ADD	-0.205336	0.0338466	36.8041	8.88402	NA	1.31e-09	ADGRB3	rs201126017	0.00110164	36.8022
ADGRB3_O60242_OID20974_v1_Neurology_expo_rt.txt	chr6	67978290	6:68688182:T:C:imp:v1	T	C	0.0647901	0.983724	33372	ADD	-0.164565	0.0156436	110.663	25.154	NA	7.01e-26	ADGRB3	rs79847550	0.00330508	110.656
ADGRB3_O60242_OID20974_v1_Neurology_expo_rt.txt	chr6	68003869	6:68713761:G:A:imp:v1	G	A	0.0173707	0.944439	33372	ADD	-0.222292	0.0300708	54.6459	12.8407	NA	1.44e-13	ADGRB3	rs34500730	0.0016348	54.6426
ADGRB3_O60242_OID20974_v1_Neurology_expo_rt.txt	chr6	68038470	6:68748362:T:C:imp:v1	T	C	0.0153698	0.966638	33372	ADD	-0.185655	0.0315887	34.5421	8.37973	NA	4.17e-09	ADGRB3	rs113166797	0.001034	34.5401
ADGRB3_O60242_OID20974_v1_Neurology_expo_rt.txt	chr6	68074078	6:68783970:G:A:imp:v1	G	A	0.062938	0.987631	33372	ADD	-0.111376	0.0158198	49.5659	11.7171	NA	1.92e-12	ADGRB3	rs34290103	0.00148304	49.5627
ADGRB3_O60242_OID20974_v1_Neurology_expo_rt.txt	chr6	68087679	6:68797571:G:C:imp:v1	G	C	0.11543	0.964622	33372	ADD	0.203546	0.0121707	279.702	62.0595	NA	8.72e-63	ADGRB3	rs117420124	0.00831164	279.684
ADGRB3_O60242_OID20974_v1_Neurology_expo_rt.txt	chr6	68107007	6:68816899:G:A:imp:v1	G	A	0.0705294	0.972565	33372	ADD	0.0947071	0.015127	39.1976	9.41679	NA	3.83e-10	ADGRB3	rs12189928	0.00117319	39.1952
ADGRB3_O60242_OID20974_v1_Neurology_expo_rt.txt	chr6	68135371	6:68845263:A:G:imp:v1	A	G	0.0519452	0.979714	33372	ADD	0.0992422	0.0173897	32.5691	7.9392	NA	1.15e-08	ADGRB3	rs75007976	0.000974996	32.5674
ADGRB3_O60242_OID20974_v1_Neurology_expo_rt.txt	chr6	68150267	6:68860159:T:C:imp:v1	T	C	0.0641942	0.984	33372	ADD	-0.105385	0.0157066	45.0185	10.7096	NA	1.95e-11	ADGRB3	rs9354676	0.00134718	45.016
ADGRB3_O60242_OID20974_v1_Neurology_expo_rt.txt	chr6	68153324	6:68863216:C:T:imp:v1	C	T	0.0667626	0.996755	33372	ADD	-0.0955034	0.0153231	38.8456	9.33847	NA	4.59e-10	ADGRB3	rs76494202	0.00116267	38.8435
ADGRB3_O60242_OID20974_v1_Neurology_expo_rt.txt	chr6	68153651	6:68863543:T:G:imp:v1	T	G	0.542614	0.923579	33372	ADD	0.0738802	0.00797564	85.8074	19.7026	NA	1.98e-20	ADGRB3	rs11963248	0.00256465	85.8023
ADGRB3_O60242_OID20974_v1_Neurology_expo_rt.txt	chr6	68157924	6:68867816:C:G:imp:v1	C	G	0.0818163	0.968231	33372	ADD	0.0988429	0.0141646	48.6949	11.5243	NA	2.99e-12	ADGRB3	rs16899765	0.00145702	48.6919
ADGRB3_O60242_OID20974_v1_Neurology_expo_rt.txt	chr6	68168129	6:68878021:A:T:imp:v1	A	T	0.665827	0.954663	33372	ADD	0.0989041	0.00828775	142.415	32.1028	NA	7.89e-33	ADGRB3	rs777659	0.00424936	142.406
ADGRB3_O60242_OID20974_v1_Neurology_expo_rt.txt	chr6	68174578	6:68884470:C:T:imp:v1	C	T	0.0497133	0.963551	33372	ADD	-0.199946	0.0178983	124.798	28.249	NA	5.64e-29	ADGRB3	rs1890094	0.00372562	124.789
ADGRB3_O60242_OID20974_v1_Neurology_expo_rt.txt	chr6	68176890	6:68886782:G:T:imp:v1	G	T	0.056131	0.940906	33372	ADD	0.117932	0.0171021	47.551	11.2709	NA	5.36e-12	ADGRB3	rs372655475	0.00142286	47.5487
ADGRB3_O60242_OID20974_v1_Neurology_expo_rt.txt	chr6	68188687	6:68898579:C:A:imp:v1	C	A	0.0154446	0.900214	33372	ADD	0.210806	0.0326513	41.6835	9.96935	NA	1.07e-10	ADGRB3	rs140766296	0.0012475	41.6811
ADGRB3_O60242_OID20974_v1_Neurology_expo_rt.txt	chr6	68204137	6:68914029:A:T:imp:v1	A	T	0.931706	0.9584	33372	ADD	0.102054	0.0154742	43.4954	10.3717	NA	4.25e-11	ADGRB3	rs9363869	0.00130166	43.4928
ADGRB3_O60242_OID20974_v1_Neurology_expo_rt.txt	chr6	68208688	6:68918580:G:A:imp:v1	G	A	0.28809	0.976183	33372	ADD	0.0496957	0.00854926	33.7894	8.21173	NA	6.14e-09	ADGRB3	rs778016	0.00101148	33.7874
ADGRB3_O60242_OID20974_v1_Neurology_expo_rt.txt	chr6	68227661	6:68937553:C:G:imp:v1	C	G	0.547694	0.998538	33372	ADD	-0.067656	0.00768675	77.4688	17.8702	NA	1.35e-18	ADGRB3	rs9454443	0.002316	77.4642
ADGRB3_O60242_OID20974_v1_Neurology_expo_rt.txt	chr6	68266591	6:68976483:C:T:imp:v1	C	T	0.0201643	0.936165	33372	ADD	0.232883	0.0280934	68.7171	15.9444	NA	1.14e-16	ADGRB3	rs143276106	0.0020549	68.7133
ADGRB3_O60242_OID20974_v1_Neurology_expo_rt.txt	chr6	68299961	6:69009853:G:A:imp:v1	G	A	0.0897588	0.970269	33372	ADD	0.121852	0.0135647	80.6946	18.5793	NA	2.63e-19	ADGRB3	rs117846256	0.0024122	80.6899
ADGRB3_O60242_OID20974_v1_Neurology_expo_rt.txt	chr6	68349818	6:69059710:C:A:imp:v1	C	A	0.0162003	0.991298	33372	ADD	0.180152	0.0303872	35.1475	8.51476	NA	3.06e-09	ADGRB3	rs117800286	0.0010521	35.1456
ADGRB3_O60242_OID20974_v1_Neurology_expo_rt.txt	chr6	68363751	6:69073643:A:G:imp:v1	A	G	0.0665014	0.986072	33372	ADD	-0.106272	0.0154317	47.4258	11.2432	NA	5.71e-12	ADGRB3	rs75618620	0.00141909	47.4225
ADGRB3_O60242_OID20974_v1_Neurology_expo_rt.txt	chr6	68365537	6:69075429:A:G:imp:v1	A	G	0.36429	0.962177	33372	ADD	0.147092	0.00808882	330.681	73.1656	NA	6.83e-74	ADGRB3	rs9363908	0.00981168	330.66
ADGRB3_O60242_OID20974_v1_Neurology_expo_rt.txt	chr6	68392524	6:69102416:T:G:imp:v1	T	G	0.0264893	1.02508	33372	ADD	-0.130118	0.023484	30.6995	7.52108	NA	3.01e-08	ADGRB3	rs116983299	0.000919071	30.6976
ADGRB3_O60242_OID20974_v1_Neurology_expo_rt.txt	chr6	68395295	6:69105187:A:G:imp:v1	A	G	0.0656389	1.00157	33372	ADD	0.0932786	0.015426	36.5645	8.83063	NA	1.48e-09	ADGRB3	rs13205715	0.00109446	36.5621
ADGRB3_O60242_OID20974_v1_Neurology_expo_rt.txt	chr6	68404548	6:69114440:C:G:imp:v1	C	G	0.10811	0.976441	33372	ADD	-0.115288	0.0124506	85.7409	19.688	NA	2.05e-20	ADGRB3	rs76063083	0.00256266	85.7357
ADGRB3_O60242_OID20974_v1_Neurology_expo_rt.txt	chr6	68405471	6:69115363:G:A:imp:v1	G	A	0.0780511	0.944024	33372	ADD	0.243389	0.0146684	275.317	61.1038	NA	7.87e-62	ADGRB3	rs72909420	0.0081825	275.303
ADGRB3_O60242_OID20974_v1_Neurology_expo_rt.txt	chr6	68411286	6:69121178:C:G:imp:v1	C	G	0.0110219	0.94572	33372	ADD	0.41856	0.0376106	123.85	28.0415	NA	9.09e-29	ADGRB3	rs144172167	0.00369746	123.842
ADGRB3_O60242_OID20974_v1_Neurology_expo_rt.txt	chr6	68416011	6:69125903:T:C:imp:v1	T	C	0.0153796	0.97721	33372	ADD	-0.29292	0.0313975	87.0378	19.9728	NA	1.06e-20	ADGRB3	rs10455220	0.00260132	87.0326
ADGRB3_O60242_OID20974_v1_Neurology_expo_rt.txt	chr6	68418874	6:69128766:A:T:imp:v1	A	T	0.454163	0.916223	33372	ADD	0.121149	0.0080125	228.614	50.9224	NA	1.2e-51	ADGRB3	rs62415498	0.00680388	228.601
ADGRB3_O60242_OID20974_v1_Neurology_expo_rt.txt	chr6	68436861	6:69146753:C:A:imp:v1	C	A	0.243048	0.98972	33372	ADD	-0.143869	0.00894951	258.427	57.4226	NA	3.78e-58	ADGRB3	rs1388044	0.00768429	258.41
ADGRB3_O60242_OID20974_v1_Neurology_expo_rt.txt	chr6	68446011	6:69155903:G:A:imp:v1	G	A	0.129708	0.99864	33372	ADD	-0.148028	0.0113762	169.313	37.9807	NA	1.05e-38	ADGRB3	rs74389373	0.00504793	169.304
ADGRB3_O60242_OID20974_v1_Neurology_expo_rt.txt	chr6	68466441	6:69176333:G:T:imp:v1	G	T	0.111466	0.992555	33372	ADD	0.0939553	0.0121898	59.4082	13.8923	NA	1.28e-14	ADGRB3	rs3125302	0.00177703	59.4051
ADGRB3_O60242_OID20974_v1_Neurology_expo_rt.txt	chr6	68483474	6:69193366:T:A:imp:v1	T	A	0.190074	1.00247	33372	ADD	-0.109842	0.00972726	127.513	28.8433	NA	1.43e-29	ADGRB3	rs2341748	0.00380642	127.506
ADGRB3_O60242_OID20974_v1_Neurology_expo_rt.txt	chr6	68485723	6:69195615:T:G:imp:v1	T	G	0.54158	0.993824	33372	ADD	-0.084736	0.00769232	121.345	27.4933	NA	3.21e-28	ADGRB3	rs9454528	0.00362295	121.338
ADGRB3_O60242_OID20974_v1_Neurology_expo_rt.txt	chr6	68487387	6:69197279:C:T:imp:v1	C	T	0.0173738	0.9	33372	ADD	0.238301	0.0308054	59.841	13.9879	NA	1.03e-14	ADGRB3	rs72908941	0.00178994	59.8373
ADGRB3_O60242_OID20974_v1_Neurology_expo_rt.txt	chr6	68490166	6:69200058:G:A:imp:v1	G	A	0.0311923	0.925465	33372	ADD	0.190641	0.0228309	69.7248	16.1663	NA	6.82e-17	ADGRB3	rs75352718	0.00208496	69.7205
ADGRB3_O60242_OID20974_v1_Neurology_expo_rt.txt	chr6	68503551	6:69213443:A:G:imp:v1	A	G	0.0367274	0.984463	33372	ADD	-0.137497	0.0204664	45.1336	10.7351	NA	1.84e-11	ADGRB3	rs12665299	0.00135062	45.1313
ADGRB3_O60242_OID20974_v1_Neurology_expo_rt.txt	chr6	68511549	6:69221441:G:T:imp:v1	G	T	0.164149	0.769672	33372	ADD	0.144702	0.0117576	151.464	34.0811	NA	8.3e-35	ADGRB3	rs72908982	0.00451817	151.456
ADGRB3_O60242_OID20974_v1_Neurology_expo_rt.txt	chr6	68526373	6:69236265:T:A:imp:v1	T	A	0.0410534	0.973821	33372	ADD	0.185393	0.0195259	90.1499	20.656	NA	2.21e-21	ADGRB3	rs118049823	0.00269408	90.1444
ADGRB3_O60242_OID20974_v1_Neurology_expo_rt.txt	chr6	68551184	6:69261076:A:C:imp:v1	A	C	0.0329917	0.972457	33372	ADD	-0.278135	0.0216871	164.479	36.9249	NA	1.19e-37	ADGRB3	rs79276364	0.00490446	164.468
ADGRB3_O60242_OID20974_v1_Neurology_expo_rt.txt	chr6	68581349	6:69291241:T:C:imp:v1	T	C	0.0587387	0.98492	33372	ADD	-0.206653	0.0163818	159.132	35.7567	NA	1.75e-36	ADGRB3	rs12660778	0.00474583	159.123
ADGRB3_O60242_OID20974_v1_Neurology_expo_rt.txt	chr6	68582286	6:69292178:A:T:imp:v1	A	T	0.670844	0.991661	33372	ADD	-0.16017	0.00817314	384.049	84.7865	NA	1.63e-85	ADGRB3	rs967640	0.0113771	384.024
ADGRB3_O60242_OID20974_v1_Neurology_expo_rt.txt	chr6	68583745	6:69293637:C:T:imp:v1	C	T	0.0147402	0.953117	33372	ADD	-0.233879	0.0324612	51.9104	12.2359	NA	5.81e-13	ADGRB3	rs140418332	0.00155309	51.9072
ADGRB3_O60242_OID20974_v1_Neurology_expo_rt.txt	chr6	68585522	6:69295414:G:T:imp:v1	G	T	0.182884	0.914102	33372	ADD	0.0573472	0.0103376	30.7743	7.53783	NA	2.9e-08	ADGRB3	rs9454581	0.000921303	30.7722
ADGRB3_O60242_OID20974_v1_Neurology_expo_rt.txt	chr6	68589636	6:69299528:C:A:imp:v1	C	A	0.13567	0.978973	33372	ADD	-0.507116	0.0112678	2025.51	441.586	NA	0	ADGRB3	rs12200055	0.0572221	2025.4
ADGRB3_O60242_OID20974_v1_Neurology_expo_rt.txt	chr6	68595554	6:69305446:G:A:imp:v1	G	A	0.0163886	0.920834	33372	ADD	-0.256722	0.0313559	67.0329	15.5735	NA	2.67e-16	ADGRB3	rs112584722	0.00200463	67.0288
ADGRB3_O60242_OID20974_v1_Neurology_expo_rt.txt	chr6	68610143	6:69320035:A:T:imp:v1	A	T	0.0310035	1.00156	33372	ADD	0.54865	0.0220144	621.12	136.37	NA	4.27e-137	ADGRB3	rs12216491	0.018272	621.085
ADGRB3_O60242_OID20974_v1_Neurology_expo_rt.txt	chr6	68616887	6:69326779:A:G:imp:v1	A	G	0.963171	0.935496	33372	ADD	0.342187	0.0209722	266.219	59.1209	NA	7.57e-60	ADGRB3	rs2585611	0.00791418	266.203
ADGRB3_O60242_OID20974_v1_Neurology_expo_rt.txt	chr6	68681799	6:69391691:A:T:imp:v1	A	T	0.014416	0.991445	33372	ADD	0.584304	0.0321715	329.865	72.9877	NA	1.03e-73	ADGRB3	rs193125375	0.00978771	329.844
ADGRB3_O60242_OID20974_v1_Neurology_expo_rt.txt	chr6	68693175	6:69403067:G:A:imp:v1	G	A	0.0292311	0.997344	33372	ADD	1.07909	0.022714	2256.99	491.875	NA	0	ADGRB3	rs112250059	0.0633468	2256.85
ADGRB3_O60242_OID20974_v1_Neurology_expo_rt.txt	chr6	68719156	6:69429048:T:C:imp:v1	T	C	0.0327279	0.958718	33372	ADD	0.224087	0.0219203	104.505	23.8047	NA	1.57e-24	ADGRB3	rs72899205	0.00312176	104.5
ADGRB3_O60242_OID20974_v1_Neurology_expo_rt.txt	chr6	68721773	6:69431665:A:G:imp:v1	A	G	0.782892	0.991745	33372	ADD	-0.137385	0.00930681	217.91	48.5877	NA	2.58e-49	ADGRB3	rs6932940	0.00648736	217.897
ADGRB3_O60242_OID20974_v1_Neurology_expo_rt.txt	chr6	68739563	6:69449455:T:C:imp:v1	T	C	0.0251648	0.943705	33372	ADD	0.219488	0.0251002	76.4663	17.6497	NA	2.24e-18	ADGRB3	rs117041580	0.00228608	76.4612
ADGRB3_O60242_OID20974_v1_Neurology_expo_rt.txt	chr6	68770428	6:69480320:A:G:imp:v1	A	G	0.0381907	0.997819	33372	ADD	0.276271	0.0199605	191.57	42.8404	NA	1.44e-43	ADGRB3	rs112150822	0.00570768	191.559
ADGRB3_O60242_OID20974_v1_Neurology_expo_rt.txt	chr6	68782914	6:69492806:A:T:imp:v1	A	T	0.0101002	0.861628	33372	ADD	-0.398039	0.0411454	93.5852	21.41	NA	3.89e-22	ADGRB3	rs189500404	0.00279647	93.5799
ADGRB3_O60242_OID20974_v1_Neurology_expo_rt.txt	chr6	68813174	6:69523066:G:A:imp:v1	G	A	0.0286821	0.948347	33372	ADD	-0.370662	0.0234995	248.793	55.3224	NA	4.76e-56	ADGRB3	rs118114184	0.00739999	248.779
ADGRB3_O60242_OID20974_v1_Neurology_expo_rt.txt	chr6	68814103	6:69523995:C:A:imp:v1	C	A	0.115391	0.959877	33372	ADD	0.60556	0.0122106	2459.46	535.858	NA	0	ADGRB3	rs149037663	0.0686398	2459.32
ADGRB3_O60242_OID20974_v1_Neurology_expo_rt.txt	chr6	68814250	6:69524142:T:C:imp:v1	T	C	0.658544	0.947459	33372	ADD	0.358605	0.00827449	1878.24	409.589	NA	0	ADGRB3	rs801260	0.0532829	1878.12
ADGRB3_O60242_OID20974_v1_Neurology_expo_rt.txt	chr6	68815961	6:69525853:A:G:imp:v1	A	G	0.0384295	0.982829	33372	ADD	-0.323274	0.0200487	259.997	57.7648	NA	1.72e-58	ADGRB3	rs78154292	0.00773066	259.982
ADGRB3_O60242_OID20974_v1_Neurology_expo_rt.txt	chr6	68831222	6:69541114:A:C:imp:v1	A	C	0.403399	0.990108	33372	ADD	-0.38525	0.00782294	2425.19	528.414	NA	0	ADGRB3	rs514518	0.067748	2425.04
ADGRB3_O60242_OID20974_v1_Neurology_expo_rt.txt	chr6	68849095	6:69558987:G:A:imp:v1	G	A	0.0589954	0.993741	33372	ADD	0.811296	0.0162663	2487.59	541.969	NA	0	ADGRB3	rs35756901	0.0693706	2487.45
ADGRB3_O60242_OID20974_v1_Neurology_expo_rt.txt	chr6	68858592	6:69568484:CA:C:imp:v1	CA	C	0.460317	0.917251	33372	ADD	-0.149848	0.00799991	350.858	77.5596	NA	2.76e-78	ADGRB3	rs373025173	0.0104042	350.837
ADGRB3_O60242_OID20974_v1_Neurology_expo_rt.txt	chr6	68894587	6:69604479:A:G:imp:v1	A	G	0.0520197	1.00589	33372	ADD	-0.35744	0.0171535	434.212	95.7059	NA	1.97e-96	ADGRB3	rs72902997	0.0128441	434.185
ADGRB3_O60242_OID20974_v1_Neurology_expo_rt.txt	chr6	68924406	6:69634298:A:C:imp:v1	A	C	0.0187055	0.967291	33372	ADD	-0.410699	0.0286607	205.34	45.8455	NA	1.43e-46	ADGRB3	rs140101293	0.00611544	205.328
ADGRB3_O60242_OID20974_v1_Neurology_expo_rt.txt	chr6	68953893	6:69663785:G:C:imp:v1	G	C	0.286383	0.993913	33372	ADD	-0.460259	0.00848286	2943.88	641.088	NA	0	ADGRB3	rs7754659	0.0810631	2943.7
ADGRB3_O60242_OID20974_v1_Neurology_expo_rt.txt	chr6	68958555	6:69668447:G:A:imp:v1	G	A	0.022784	0.941791	33372	ADD	0.668633	0.0263805	642.405	140.999	NA	1e-141	ADGRB3	rs117113063	0.0188863	642.367
ADGRB3_O60242_OID20974_v1_Neurology_expo_rt.txt	chr6	68972513	6:69682405:A:C:imp:v1	A	C	0.0550227	0.980462	33372	ADD	-0.785438	0.0169356	2150.91	468.829	NA	0	ADGRB3	rs72906768	0.06055	2150.78
ADGRB3_O60242_OID20974_v1_Neurology_expo_rt.txt	chr6	68975516	6:69685408:T:A:imp:v1	T	A	0.0277727	0.968777	33372	ADD	0.218981	0.0236182	85.9644	19.7371	NA	1.83e-20	ADGRB3	rs75710318	0.00256933	85.9594
ADGRB3_O60242_OID20974_v1_Neurology_expo_rt.txt	chr6	69005574	6:69715466:C:T:imp:v1	C	T	0.443423	0.997262	33372	ADD	-0.431187	0.00769971	3136.05	682.83	NA	0	ADGRB3	rs3799002	0.0859002	3135.86
ADGRB3_O60242_OID20974_v1_Neurology_expo_rt.txt	chr6	69011323	6:69721215:C:G:imp:v1	C	G	0.0331019	0.977417	33372	ADD	-0.344725	0.0215944	254.837	56.64	NA	2.29e-57	ADGRB3	rs116980140	0.00757839	254.822
ADGRB3_O60242_OID20974_v1_Neurology_expo_rt.txt	chr6	69025434	6:69735326:C:A:imp:v1	C	A	0.0639758	0.999706	33372	ADD	-0.524907	0.015607	1131.16	247.254	NA	5.57e-248	ADGRB3	rs17401137	0.0327844	1131.1
ADGRB3_O60242_OID20974_v1_Neurology_expo_rt.txt	chr6	69042132	6:69752024:C:T:imp:v1	C	T	0.0160871	0.966304	33372	ADD	-0.623952	0.0308979	407.798	89.9566	NA	1.11e-90	ADGRB3	rs12210747	0.0120722	407.773
ADGRB3_O60242_OID20974_v1_Neurology_expo_rt.txt	chr6	69042637	6:69752529:C:G:imp:v1	C	G	0.0567242	0.997548	33372	ADD	-0.576598	0.0165294	1216.83	265.873	NA	1.34e-266	ADGRB3	rs17479848	0.03518	1216.76
ADGRB3_O60242_OID20974_v1_Neurology_expo_rt.txt	chr6	69047170	6:69757062:A:C:imp:v1	A	C	0.0311195	1.00297	33372	ADD	0.592931	0.0219614	728.932	159.816	NA	1.53e-160	ADGRB3	rs116973849	0.0213758	728.89
ADGRB3_O60242_OID20974_v1_Neurology_expo_rt.txt	chr6	69047813	6:69757705:C:A:imp:v1	C	A	0.0185176	0.927076	33372	ADD	-0.382812	0.0294385	169.099	37.934	NA	1.16e-38	ADGRB3	rs144421316	0.00504153	169.088
ADGRB3_O60242_OID20974_v1_Neurology_expo_rt.txt	chr6	69065760	6:69775652:T:C:imp:v1	T	C	0.0429476	0.873668	33372	ADD	0.253439	0.0201536	158.14	35.5399	NA	2.88e-36	ADGRB3	rs2343397	0.00471635	158.13
ADGRB3_O60242_OID20974_v1_Neurology_expo_rt.txt	chr6	69115324	6:69825216:T:C:imp:v1	T	C	0.0305385	0.983484	33372	ADD	0.428027	0.0223932	365.35	80.7153	NA	1.93e-81	ADGRB3	rs35740189	0.0108293	365.329
ADGRB3_O60242_OID20974_v1_Neurology_expo_rt.txt	chr6	69144876	6:69854768:G:GTTCTTTCT:imp:v1	G	GTTCTTTCT	0.967803	0.885355	33372	ADD	0.225803	0.0229889	96.4768	22.0443	NA	9.03e-23	ADGRB3	rs201168028	0.00288262	96.471
ADGRB3_O60242_OID20974_v1_Neurology_expo_rt.txt	chr6	69153783	6:69863675:G:A:imp:v1	G	A	0.112707	0.988743	33372	ADD	0.522139	0.0121477	1847.49	402.909	NA	0	ADGRB3	rs2880593	0.0524567	1847.39
ADGRB3_O60242_OID20974_v1_Neurology_expo_rt.txt	chr6	69190944	6:69900836:C:A:imp:v1	C	A	0.0977346	0.983095	33372	ADD	-0.156609	0.0129713	145.77	32.8364	NA	1.46e-33	ADGRB3	rs9354826	0.00434902	145.761
ADGRB3_O60242_OID20974_v1_Neurology_expo_rt.txt	chr6	69297658	6:70007550:G:T:imp:v1	G	T	0.744163	0.977935	33372	ADD	-0.502768	0.00885521	3223.57	701.841	NA	0	ADGRB3	rs1885331	0.0880864	3223.38
ADGRB3_O60242_OID20974_v1_Neurology_expo_rt.txt	chr6	69329595	6:70039487:G:C:imp:v1	G	C	0.181765	0.980786	33372	ADD	0.197149	0.0100023	388.5	85.7557	NA	1.76e-86	ADGRB3	rs1321973	0.0115075	388.475
ADGRB3_O60242_OID20974_v1_Neurology_expo_rt.txt	chr6	69332030	6:70041922:A:G:imp:v1	A	G	0.980211	0.972986	33372	ADD	-0.539999	0.0278105	377.024	83.2572	NA	5.53e-84	ADGRB3	rs1283471	0.0111714	377.001
ADGRB3_O60242_OID20974_v1_Neurology_expo_rt.txt	chr6	69358935	6:70068827:A:T:imp:v1	A	T	0.0182214	0.811832	33372	ADD	0.179715	0.0316933	32.1541	7.84645	NA	1.42e-08	ADGRB3	rs9454737	0.000962572	32.152
ADGRB3_O60242_OID20974_v1_Neurology_expo_rt.txt	chr6	69378816	6:70088708:T:C:imp:v1	T	C	0.0230583	0.995021	33372	ADD	-0.311998	0.0255288	149.363	33.6218	NA	2.39e-34	ADGRB3	rs79107067	0.00445575	149.354
ADGRB3_O60242_OID20974_v1_Neurology_expo_rt.txt	chr6	69398375	6:70108267:T:C:imp:v1	T	C	0.197321	1.00466	33372	ADD	-0.388372	0.00957384	1645.6	359.044	NA	0	ADGRB3	rs34521235	0.0469934	1645.5
ADGRB3_O60242_OID20974_v1_Neurology_expo_rt.txt	chr6	69413681	6:70123573:C:T:imp:v1	C	T	0.025067	0.97729	33372	ADD	-0.353284	0.0247092	204.424	45.6456	NA	2.26e-46	ADGRB3	rs139962626	0.0060883	204.411
ADGRB3_O60242_OID20974_v1_Neurology_expo_rt.txt	chr6	69432577	6:70142469:G:C:imp:v1	G	C	0.115565	0.999107	33372	ADD	-0.275584	0.011964	530.587	116.677	NA	2.1e-117	ADGRB3	rs140765488	0.0156503	530.553
ADGRB3_O60242_OID20974_v1_Neurology_expo_rt.txt	chr6	69434443	6:70144335:C:G:imp:v1	C	G	0.0253827	0.983401	33372	ADD	0.220489	0.0244786	81.1342	18.6759	NA	2.11e-19	ADGRB3	rs139605750	0.00242529	81.1287
ADGRB3_O60242_OID20974_v1_Neurology_expo_rt.txt	chr6	69435034	6:70144926:C:CAAATAAATAAATAAATAAAT:imp:v1	C	CAAATAAATAAATAAATAAAT	0.537544	0.958471	33372	ADD	-0.200723	0.00782463	658.064	144.405	NA	3.94e-145	ADGRB3	rs200829811	0.0193377	658.022
ADGRB3_O60242_OID20974_v1_Neurology_expo_rt.txt	chr6	69481091	6:70190983:G:A:imp:v1	G	A	0.0606631	0.899338	33372	ADD	0.164797	0.0168719	95.4055	21.8093	NA	1.55e-22	ADGRB3	rs150938912	0.00285068	95.3992
ADGRB3_O60242_OID20974_v1_Neurology_expo_rt.txt	chr6	69502244	6:70212136:G:A:imp:v1	G	A	0.0105563	0.919103	33372	ADD	-0.330044	0.0389621	71.7561	16.6135	NA	2.44e-17	ADGRB3	rs140334977	0.00214558	71.7518
ADGRB3_O60242_OID20974_v1_Neurology_expo_rt.txt	chr6	69505447	6:70215339:A:G:imp:v1	A	G	0.093273	0.815584	33372	ADD	0.154104	0.0145392	112.343	25.5222	NA	3e-26	ADGRB3	rs12197747	0.0033551	112.336
ADGRB3_O60242_OID20974_v1_Neurology_expo_rt.txt	chr6	69512397	6:70222289:C:T:imp:v1	C	T	0.0168337	0.939941	33372	ADD	0.231548	0.0306041	57.2429	13.4143	NA	3.85e-14	ADGRB3	rs117586122	0.00171236	57.2396
ADGRB3_O60242_OID20974_v1_Neurology_expo_rt.txt	chr6	69536382	6:70246274:T:C:imp:v1	T	C	0.0128317	0.949264	33372	ADD	-0.220198	0.0348464	39.9312	9.57992	NA	2.63e-10	ADGRB3	rs71559558	0.00119511	39.9287
ADGRB3_O60242_OID20974_v1_Neurology_expo_rt.txt	chr6	69590808	6:70300700:G:C:imp:v1	G	C	0.0206566	0.951373	33372	ADD	0.576241	0.0275493	437.509	96.4235	NA	3.77e-97	ADGRB3	rs112157025	0.0129404	437.483
ADGRB3_O60242_OID20974_v1_Neurology_expo_rt.txt	chr6	69621097	6:70330989:A:G:imp:v1	A	G	0.0238224	1.00137	33372	ADD	-0.245197	0.025035	95.9256	21.9234	NA	1.19e-22	ADGRB3	rs76286859	0.0028662	95.92
ADGRB3_O60242_OID20974_v1_Neurology_expo_rt.txt	chr6	69662085	6:70371977:G:A:imp:v1	G	A	0.162968	0.999656	33372	ADD	-0.178299	0.0103532	296.583	65.7378	NA	1.83e-66	ADGRB3	rs12197211	0.00880894	296.567
ADGRB3_O60242_OID20974_v1_Neurology_expo_rt.txt	chr6	69681802	6:70391694:T:C:imp:v1	T	C	0.169135	1.00704	33372	ADD	0.158291	0.0101531	243.06	54.0725	NA	8.46e-55	ADGRB3	rs4706274	0.00723072	243.046
ADGRB3_O60242_OID20974_v1_Neurology_expo_rt.txt	chr6	69755588	6:70465480:TA:T:imp:v1	TA	T	0.243927	0.82088	33372	ADD	0.204321	0.00981732	433.152	95.4751	NA	3.35e-96	ADGRB3	rs199633432	0.0128132	433.126
ADGRB3_O60242_OID20974_v1_Neurology_expo_rt.txt	chr6	69800159	6:70510051:G:A:imp:v1	G	A	0.148155	0.995647	33372	ADD	0.257928	0.010775	573.009	125.905	NA	1.24e-126	ADGRB3	rs4620077	0.0168805	572.976
ADGRB3_O60242_OID20974_v1_Neurology_expo_rt.txt	chr6	69815089	6:70524981:T:C:imp:v1	T	C	0.0734451	0.981679	33372	ADD	0.271883	0.0147738	338.672	74.9058	NA	1.24e-75	ADGRB3	rs78323479	0.0100464	338.652
ADGRB3_O60242_OID20974_v1_Neurology_expo_rt.txt	chr6	69816885	6:70526777:G:A:imp:v1	G	A	0.43469	0.982953	33372	ADD	0.0667095	0.00777179	73.6772	17.0362	NA	9.2e-18	ADGRB3	rs2487423	0.00220289	73.6728
ADGRB3_O60242_OID20974_v1_Neurology_expo_rt.txt	chr6	69819268	6:70529160:G:T:imp:v1	G	T	0.0277415	0.955784	33372	ADD	-0.231797	0.0238065	94.8036	21.6773	NA	2.1e-22	ADGRB3	rs146236405	0.00283276	94.7979
ADGRB3_O60242_OID20974_v1_Neurology_expo_rt.txt	chr6	69820689	6:70530581:A:G:imp:v1	A	G	0.178053	1.00307	33372	ADD	0.0822166	0.00997564	67.9262	15.7702	NA	1.7e-16	ADGRB3	rs9454900	0.00203129	67.9222
ADGRB3_O60242_OID20974_v1_Neurology_expo_rt.txt	chr6	69829185	6:70539077:T:G:imp:v1	T	G	0.0311569	0.952355	33372	ADD	0.240971	0.0225211	114.485	25.9913	NA	1.02e-26	ADGRB3	rs142435741	0.00341886	114.479
ADGRB3_O60242_OID20974_v1_Neurology_expo_rt.txt	chr6	69837601	6:70547493:C:T:imp:v1	C	T	0.0114018	0.996442	33372	ADD	0.324667	0.0360413	81.1478	18.6789	NA	2.09e-19	ADGRB3	rs78220871	0.00242571	81.1427
ADGRB3_O60242_OID20974_v1_Neurology_expo_rt.txt	chr6	69871122	6:70581014:T:C:imp:v1	T	C	0.0296806	1.00167	33372	ADD	0.242357	0.0224805	116.225	26.3723	NA	4.24e-27	ADGRB3	rs117015028	0.00347062	116.218
ADGRB3_O60242_OID20974_v1_Neurology_expo_rt.txt	chr6	69888362	6:70598254:T:C:imp:v1	T	C	0.448403	0.995774	33372	ADD	-0.0473375	0.00769981	37.7964	9.10498	NA	7.85e-10	ADGRB3	rs2502549	0.0011313	37.7942
ADGRB3_O60242_OID20974_v1_Neurology_expo_rt.txt	chr6	69892976	6:70602868:T:C:imp:v1	T	C	0.128641	0.984183	33372	ADD	-0.158648	0.0115112	189.945	42.4857	NA	3.27e-43	ADGRB3	rs60536675	0.00565954	189.934
ADGRB3_O60242_OID20974_v1_Neurology_expo_rt.txt	chr6	69919895	6:70629787:C:G:imp:v1	C	G	0.018446	0.908973	33372	ADD	-0.216369	0.0297817	52.7826	12.4288	NA	3.73e-13	ADGRB3	rs148858078	0.00157915	52.7795
ADGRB3_O60242_OID20974_v1_Neurology_expo_rt.txt	chr6	69930168	6:70640060:A:G:imp:v1	A	G	0.0256203	1.00371	33372	ADD	-0.269585	0.0241271	124.848	28.26	NA	5.5e-29	ADGRB3	rs17765889	0.00372715	124.84
ADGRB3_O60242_OID20974_v1_Neurology_expo_rt.txt	chr6	69952869	6:70662761:G:T:imp:v1	G	T	0.0118339	0.916761	33372	ADD	-0.338729	0.0368932	84.2969	19.3708	NA	4.26e-20	ADGRB3	rs1934902	0.00251961	84.2919
ADGRB3_O60242_OID20974_v1_Neurology_expo_rt.txt	chr6	69987311	6:70697203:A:G:imp:v1	A	G	0.0166757	1.0068	33372	ADD	-0.209164	0.0297163	49.5431	11.7121	NA	1.94e-12	ADGRB3	rs117625717	0.00148237	49.5403
ADGRB3_O60242_OID20974_v1_Neurology_expo_rt.txt	chr6	69997028	6:70706920:G:T:imp:v1	G	T	0.622608	0.744755	33372	ADD	-0.0692498	0.00912969	57.5341	13.4786	NA	3.32e-14	ADGRB3	rs12195454	0.00172105	57.5306
ADGRB3_O60242_OID20974_v1_Neurology_expo_rt.txt	chr6	69997030	6:70706922:G:T:imp:v1	G	T	0.292351	0.857479	33372	ADD	-0.0931325	0.00907675	105.279	23.9743	NA	1.06e-24	ADGRB3	rs201745005	0.00314479	105.273
ADGRB3_O60242_OID20974_v1_Neurology_expo_rt.txt	chr6	70030881	6:70740773:C:T:imp:v1	C	T	0.549782	0.92387	33372	ADD	0.116334	0.0080106	210.903	47.0591	NA	8.73e-48	ADGRB3	rs9342782	0.00628008	210.891
ADGRB3_O60242_OID20974_v1_Neurology_expo_rt.txt	chr6	70034842	6:70744734:T:C:imp:v1	T	C	0.0463412	0.997514	33372	ADD	-0.108518	0.0182025	35.5418	8.6027	NA	2.5e-09	ADGRB3	rs80204713	0.00106389	35.5398
ADGRB3_O60242_OID20974_v1_Neurology_expo_rt.txt	chr6	70037248	6:70747140:C:T:imp:v1	C	T	0.0277102	0.90838	33372	ADD	-0.150408	0.0244109	37.9643	9.14237	NA	7.2e-10	ADGRB3	rs138327744	0.00113631	37.9619
ADGRB3_O60242_OID20974_v1_Neurology_expo_rt.txt	chr6	70051916	6:70761808:C:G:imp:v1	C	G	0.107795	0.998874	33372	ADD	-0.0917258	0.0123232	55.4039	13.0081	NA	9.82e-14	ADGRB3	rs78257235	0.00165742	55.4
ADGRB3_O60242_OID20974_v1_Neurology_expo_rt.txt	chr6	70067218	6:70777110:G:A:imp:v1	G	A	0.0138889	0.994667	33372	ADD	0.28056	0.0327296	73.48	16.9928	NA	1.02e-17	ADGRB3	rs117798390	0.00219701	73.4758
ADGRB3_O60242_OID20974_v1_Neurology_expo_rt.txt	chr6	70093561	6:70803453:G:A:imp:v1	G	A	0.384563	0.985824	33372	ADD	0.122188	0.00791506	238.313	53.0374	NA	9.17e-54	ADGRB3	rs3806022	0.00709049	238.299
ADGRB3_O60242_OID20974_v1_Neurology_expo_rt.txt	chr6	70106424	6:70816316:T:C:imp:v1	T	C	0.0179019	0.978603	33372	ADD	-0.199633	0.0291295	46.9678	11.1417	NA	7.22e-12	ADGRB3	rs13208290	0.00140542	46.9648
ADGRB3_O60242_OID20974_v1_Neurology_expo_rt.txt	chr6	70116015	6:70825907:T:A:imp:v1	T	A	0.905613	0.974491	33372	ADD	0.211848	0.0132385	256.078	56.9107	NA	1.23e-57	ADGRB3	rs3828771	0.00761499	256.062
ADGRB3_O60242_OID20974_v1_Neurology_expo_rt.txt	chr6	70123252	6:70833144:A:T:imp:v1	A	T	0.0976777	0.970854	33372	ADD	0.182648	0.0130531	195.795	43.7625	NA	1.73e-44	ADGRB3	rs12208104	0.00583283	195.784
ADGRB3_O60242_OID20974_v1_Neurology_expo_rt.txt	chr6	70144634	6:70854526:G:A:imp:v1	G	A	0.0185062	0.916033	33372	ADD	0.200521	0.0296094	45.8629	10.8968	NA	1.27e-11	ADGRB3	rs144837248	0.0013724	45.86
ADGRB3_O60242_OID20974_v1_Neurology_expo_rt.txt	chr6	70215196	6:70924899:C:G:imp:v1	C	G	0.142116	0.960238	33372	ADD	0.0639069	0.0111711	32.7266	7.97439	NA	1.06e-08	ADGRB3	rs62421673	0.000979706	32.7248
ADGRB3_O60242_OID20974_v1_Neurology_expo_rt.txt	chr6	70230448	6:70940151:G:A:imp:v1	G	A	0.510268	0.987373	33372	ADD	0.0707159	0.00771392	84.0395	19.3143	NA	4.85e-20	ADGRB3	rs538588	0.00251194	84.0345
ADGRB3_O60242_OID20974_v1_Neurology_expo_rt.txt	chr6	70286887	6:70996590:G:A:imp:v1	G	A	0.488172	0.993053	33372	ADD	-0.0593114	0.00767253	59.7584	13.9696	NA	1.07e-14	ADGRB3	rs495823	0.00178747	59.7548
ADGRB3_O60242_OID20974_v1_Neurology_expo_rt.txt	chr6	70320594	6:71030297:G:A:imp:v1	G	A	0.195921	0.967976	33372	ADD	0.069773	0.00979271	50.7655	11.9826	NA	1.04e-12	ADGRB3	rs1066750	0.00151889	50.7625
ADGRB3_O60242_OID20974_v1_Neurology_expo_rt.txt	chr6	70323442	6:71033145:G:A:imp:v1	G	A	0.238476	0.931016	33372	ADD	-0.102396	0.00928813	121.536	27.5352	NA	2.92e-28	ADGRB3	rs4707768	0.00362868	121.53
ADGRB3_O60242_OID20974_v1_Neurology_expo_rt.txt	chr6	70324696	6:71034399:C:T:imp:v1	C	T	0.023082	0.935305	33372	ADD	0.188831	0.0263094	51.5136	12.1481	NA	7.11e-13	ADGRB3	rs144577540	0.00154125	51.5108
ADGRB3_O60242_OID20974_v1_Neurology_expo_rt.txt	chr6	70324762	6:71034465:G:A:imp:v1	G	A	0.0148284	0.96137	33372	ADD	0.24413	0.0322248	57.3933	13.4476	NA	3.57e-14	ADGRB3	rs189245922	0.00171685	57.3899
ADGRB3_O60242_OID20974_v1_Neurology_expo_rt.txt	chr6	70325282	6:71034985:C:G:imp:v1	C	G	0.0139321	0.957153	33372	ADD	-0.281136	0.0333242	71.1727	16.4851	NA	3.27e-17	ADGRB3	rs117315482	0.00212817	71.1684
ADGRB3_O60242_OID20974_v1_Neurology_expo_rt.txt	chr6	70343600	6:71053303:G:A:imp:v1	G	A	0.10711	0.947968	33372	ADD	0.110061	0.0126809	75.3295	17.3997	NA	3.98e-18	ADGRB3	rs35783095	0.00225219	75.3253
ADGRB3_O60242_OID20974_v1_Neurology_expo_rt.txt	chr6	70352381	6:71062084:C:T:imp:v1	C	T	0.447241	0.971021	33372	ADD	0.0451595	0.00779571	33.5573	8.15992	NA	6.92e-09	ADGRB3	rs4142145	0.00100454	33.5553
ADGRB3_O60242_OID20974_v1_Neurology_expo_rt.txt	chr6	70362909	6:71072612:G:A:imp:v1	G	A	0.0138889	0.961656	33372	ADD	0.193726	0.0332814	33.8824	8.2325	NA	5.85e-09	ADGRB3	rs113217763	0.00101426	33.8803
ADGRB3_O60242_OID20974_v1_Neurology_expo_rt.txt	chr6	70390529	6:71100232:G:A:imp:v1	G	A	0.0365309	0.979567	33372	ADD	-0.208191	0.0205964	102.174	23.2937	NA	5.09e-24	ADGRB3	rs3901049	0.00305233	102.168
ADGRD1_Q6QNK2_OID30588_v1_Inflammation_II_expo_rt.txt	chr12	130359174	12:130843719:G:C:imp:v1	G	C	0.161289	0.9959	33187	ADD	0.0704038	0.00940168	56.0765	13.1567	NA	6.97e-14	ADGRD1	rs61940168	0.00168686	56.0732
ADGRD1_Q6QNK2_OID30588_v1_Inflammation_II_expo_rt.txt	chr12	130821529	12:131306074:T:C:imp:v1	T	C	0.0167168	0.885581	33187	ADD	-0.168	0.0286011	34.5027	8.37094	NA	4.26e-09	ADGRD1	rs118006049	0.00103856	34.5006
ADGRD1_Q6QNK2_OID30588_v1_Inflammation_II_expo_rt.txt	chr12	130882919	12:131367464:G:A:imp:v1	G	A	0.111091	1.00726	33187	ADD	0.077887	0.0109437	50.6525	11.9576	NA	1.1e-12	ADGRD1	rs73469107	0.00152395	50.6495
ADGRD1_Q6QNK2_OID30588_v1_Inflammation_II_expo_rt.txt	chr12	130893037	12:131377582:G:A:imp:v1	G	A	0.0210586	0.878327	33187	ADD	-0.24669	0.0256494	92.5017	21.1722	NA	6.73e-22	ADGRD1	rs148133124	0.00277953	92.4959
ADGRD1_Q6QNK2_OID30588_v1_Inflammation_II_expo_rt.txt	chr12	130936031	12:131420576:A:G:imp:v1	A	G	0.248621	1.003	33187	ADD	0.0610535	0.00797163	58.6578	13.7267	NA	1.88e-14	ADGRD1	rs7959959	0.00176438	58.6544
ADGRD1_Q6QNK2_OID30588_v1_Inflammation_II_expo_rt.txt	chr12	130950981	12:131435526:T:C:imp:v1	T	C	0.0717863	0.979287	33187	ADD	-0.19269	0.0135138	203.313	45.4031	NA	3.95e-46	ADGRD1	rs73164852	0.00608896	203.3
ADGRD1_Q6QNK2_OID30588_v1_Inflammation_II_expo_rt.txt	chr12	130953492	12:131438037:T:C:imp:v1	T	C	0.490313	0.941861	33187	ADD	0.0693027	0.0071122	94.9494	21.7093	NA	1.95e-22	ADGRD1	rs6486617	0.00285288	94.9437
ADGRD1_Q6QNK2_OID30588_v1_Inflammation_II_expo_rt.txt	chr12	130953544	12:131438089:C:T:imp:v1	C	T	0.0140718	1.01179	33187	ADD	-0.170858	0.0291217	34.4221	8.35296	NA	4.44e-09	ADGRD1	rs117011358	0.00103614	34.42
ADGRD1_Q6QNK2_OID30588_v1_Inflammation_II_expo_rt.txt	chr12	130954148	12:131438693:C:T:imp:v1	C	T	0.105411	0.943512	33187	ADD	-0.225436	0.0115696	379.673	83.834	NA	1.47e-84	ADGRD1	rs61936888	0.011311	379.65
ADGRD1_Q6QNK2_OID30588_v1_Inflammation_II_expo_rt.txt	chr12	130954694	12:131439239:T:C:imp:v1	T	C	0.477968	0.983503	33187	ADD	-0.202287	0.00696461	843.613	184.75	NA	1.78e-185	ADGRD1	rs10848261	0.0247898	843.56
ADGRD1_Q6QNK2_OID30588_v1_Inflammation_II_expo_rt.txt	chr12	130962624	12:131447169:A:G:imp:v1	A	G	0.0345578	0.966495	33187	ADD	-0.957406	0.0192108	2483.72	541.128	NA	0	ADGRD1	rs79551144	0.0696289	2483.56
ADGRD1_Q6QNK2_OID30588_v1_Inflammation_II_expo_rt.txt	chr12	130968916	12:131453461:G:T:imp:v1	G	T	0.0996475	1.00284	33187	ADD	0.114809	0.0115053	99.5758	22.724	NA	1.89e-23	ADGRD1	rs80224014	0.00299148	99.5703
ADGRD1_Q6QNK2_OID30588_v1_Inflammation_II_expo_rt.txt	chr12	130973808	12:131458353:G:A:imp:v1	G	A	0.0855521	0.815881	33187	ADD	0.317899	0.013657	541.832	119.123	NA	7.53e-120	ADGRD1	rs150004129	0.0160645	541.803
ADGRD1_Q6QNK2_OID30588_v1_Inflammation_II_expo_rt.txt	chr12	130979973	12:131464518:A:G:imp:v1	A	G	0.0347721	0.982981	33187	ADD	-0.41234	0.018995	471.231	103.762	NA	1.73e-104	ADGRD1	rs112483487	0.0140004	471.201
ADGRD1_Q6QNK2_OID30588_v1_Inflammation_II_expo_rt.txt	chr12	130981411	12:131465956:G:C:imp:v1	G	C	0.134926	0.986747	33187	ADD	-0.0607761	0.0101699	35.7138	8.64103	NA	2.29e-09	ADGRD1	rs12821379	0.00107497	35.7113
ADGRD1_Q6QNK2_OID30588_v1_Inflammation_II_expo_rt.txt	chr12	131014401	12:131498946:C:T:imp:v1	C	T	0.682165	1.00093	33187	ADD	-0.172835	0.00740919	544.156	119.629	NA	2.35e-120	ADGRD1	rs1212936	0.0161321	544.121
ADGRD1_Q6QNK2_OID30588_v1_Inflammation_II_expo_rt.txt	chr12	131017315	12:131501860:C:T:imp:v1	C	T	0.127307	0.982029	33187	ADD	-0.236036	0.0104501	510.174	112.236	NA	5.81e-113	ADGRD1	rs34722201	0.0151399	510.14
ADGRD1_Q6QNK2_OID30588_v1_Inflammation_II_expo_rt.txt	chr12	131029700	12:131514245:A:G:imp:v1	A	G	0.0430014	0.715447	33187	ADD	-0.272427	0.0201116	183.487	41.0759	NA	8.4e-42	ADGRD1	rs12231185	0.0054985	183.477
ADGRD1_Q6QNK2_OID30588_v1_Inflammation_II_expo_rt.txt	chr12	131032710	12:131517255:A:G:imp:v1	A	G	0.0124083	0.948932	33187	ADD	-0.214995	0.0320232	45.0741	10.7219	NA	1.9e-11	ADGRD1	rs12297290	0.00135634	45.0714
ADGRD1_Q6QNK2_OID30588_v1_Inflammation_II_expo_rt.txt	chr12	131032725	12:131517270:T:C:imp:v1	T	C	0.454288	0.968415	33187	ADD	0.0864766	0.00704174	150.813	33.9387	NA	1.15e-34	ADGRD1	rs7138399	0.00452377	150.803
ADGRD1_Q6QNK2_OID30588_v1_Inflammation_II_expo_rt.txt	chr12	131038422	12:131522967:C:T:imp:v1	C	T	0.019134	0.999759	33187	ADD	0.172863	0.0251893	47.0948	11.1698	NA	6.76e-12	ADGRD1	rs112033975	0.00141706	47.0918
ADGRD1_Q6QNK2_OID30588_v1_Inflammation_II_expo_rt.txt	chr12	131047989	12:131532534:G:A:imp:v1	G	A	0.0115982	0.958699	33187	ADD	0.280978	0.0329172	72.8617	16.8568	NA	1.39e-17	ADGRD1	rs75517571	0.00219068	72.8572
ADGRD1_Q6QNK2_OID30588_v1_Inflammation_II_expo_rt.txt	chr12	131086041	12:131570586:G:A:imp:v1	G	A	0.0317896	0.985767	33187	ADD	0.240167	0.0198125	146.943	33.0928	NA	8.08e-34	ADGRD1	rs73166649	0.0044082	146.934
ADGRD1_Q6QNK2_OID30588_v1_Inflammation_II_expo_rt.txt	chr12	131086743	12:131571288:G:A:imp:v1	G	A	0.0124724	0.977339	33187	ADD	0.267028	0.0314605	72.0415	16.6763	NA	2.11e-17	ADGRD1	rs74653052	0.00216607	72.0371
ADGRD1_Q6QNK2_OID30588_v1_Inflammation_II_expo_rt.txt	chr12	131093081	12:131577626:C:T:imp:v1	C	T	0.0398216	0.981962	33187	ADD	-0.181869	0.0178131	104.24	23.7466	NA	1.79e-24	ADGRD1	rs73149904	0.00313118	104.235
ADGRD1_Q6QNK2_OID30588_v1_Inflammation_II_expo_rt.txt	chr12	131097608	12:131582153:G:T:imp:v1	G	T	0.940152	0.982368	33187	ADD	0.528133	0.0146733	1295.49	282.966	NA	1.08e-283	ADGRD1	rs10744492	0.0375692	1295.4
ADGRD1_Q6QNK2_OID30588_v1_Inflammation_II_expo_rt.txt	chr12	131098159	12:131582704:T:C:imp:v1	T	C	0.453802	0.807175	33187	ADD	0.1138	0.00771555	217.547	48.5086	NA	3.1e-49	ADGRD1	rs11061323	0.00651246	217.533
ADGRD1_Q6QNK2_OID30588_v1_Inflammation_II_expo_rt.txt	chr12	131103124	12:131587669:T:C:imp:v1	T	C	0.363626	0.984395	33187	ADD	0.232195	0.00722881	1031.74	225.645	NA	2.26e-226	ADGRD1	rs10773846	0.0301514	1031.68
ADGRD1_Q6QNK2_OID30588_v1_Inflammation_II_expo_rt.txt	chr12	131112979	12:131597524:G:T:imp:v1	G	T	0.0114201	1.00179	33187	ADD	0.205296	0.0324453	40.0366	9.60337	NA	2.49e-10	ADGRD1	rs76234479	0.00120494	40.0342
ADGRD1_Q6QNK2_OID30588_v1_Inflammation_II_expo_rt.txt	chr12	131115270	12:131599815:A:G:imp:v1	A	G	0.20904	0.985394	33187	ADD	-0.0804039	0.00855076	88.4187	20.276	NA	5.3e-21	ADGRD1	rs2049566	0.00265718	88.4135
ADGRD1_Q6QNK2_OID30588_v1_Inflammation_II_expo_rt.txt	chr12	131118222	12:131602767:G:A:imp:v1	G	A	0.0188522	0.905793	33187	ADD	0.146276	0.026652	30.1224	7.39188	NA	4.06e-08	ADGRD1	rs139969910	0.000906827	30.1204
ADGRD1_Q6QNK2_OID30588_v1_Inflammation_II_expo_rt.txt	chr12	131129211	12:131613756:G:A:imp:v1	G	A	0.0261178	0.895291	33187	ADD	-0.554366	0.022868	587.678	129.096	NA	8.02e-130	ADGRD1	rs189309784	0.0173999	587.639
ADGRD1_Q6QNK2_OID30588_v1_Inflammation_II_expo_rt.txt	chr12	131138702	12:131623247:C:T:imp:v1	C	T	0.342606	0.996866	33187	ADD	-0.0464769	0.00728435	40.7092	9.75288	NA	1.77e-10	ADGRD1	rs7978844	0.00122516	40.7068
ADGRD1_Q6QNK2_OID30588_v1_Inflammation_II_expo_rt.txt	chr12	131163695	12:131648240:G:A:imp:v1	G	A	0.0213116	0.857032	33187	ADD	0.391836	0.0258087	230.503	51.3343	NA	4.63e-52	ADGRD1	rs144908156	0.00689767	230.489
ADGRD1_Q6QNK2_OID30588_v1_Inflammation_II_expo_rt.txt	chr12	131170419	12:131654964:C:T:imp:v1	C	T	0.0376169	0.923889	33187	ADD	-0.239214	0.0188794	160.545	36.0654	NA	8.6e-37	ADGRD1	rs61937025	0.0048143	160.535
ADGRD1_Q6QNK2_OID30588_v1_Inflammation_II_expo_rt.txt	chr12	131171541	12:131656086:T:G:imp:v1	T	G	0.027345	1.00134	33187	ADD	-0.119262	0.0211534	31.7864	7.76424	NA	1.72e-08	ADGRD1	rs117361920	0.000956886	31.7847
ADGRD1_Q6QNK2_OID30588_v1_Inflammation_II_expo_rt.txt	chr12	131175682	12:131660227:A:G:imp:v1	A	G	0.991623	0.995147	33187	ADD	-0.52782	0.0379503	193.437	43.248	NA	5.65e-44	ADGRD1	rs4759857	0.00579494	193.426
ADGRD1_Q6QNK2_OID30588_v1_Inflammation_II_expo_rt.txt	chr12	131196431	12:131680976:A:G:imp:v1	A	G	0.0467804	1.00228	33187	ADD	-0.246081	0.0163205	227.346	50.6459	NA	2.26e-51	ADGRD1	rs74553400	0.00680387	227.333
ADGRD1_Q6QNK2_OID30588_v1_Inflammation_II_expo_rt.txt	chr12	131207114	12:131691659:T:C:imp:v1	T	C	0.0132883	1.01411	33187	ADD	0.200488	0.0299357	44.8535	10.673	NA	2.12e-11	ADGRD1	rs117609841	0.00134972	44.851
ADGRD1_Q6QNK2_OID30588_v1_Inflammation_II_expo_rt.txt	chr12	131213731	12:131698276:A:G:imp:v1	A	G	0.0371486	0.94162	33187	ADD	0.142344	0.0188067	57.2866	13.424	NA	3.77e-14	ADGRD1	rs141400245	0.0017232	57.2832
ADGRD1_Q6QNK2_OID30588_v1_Inflammation_II_expo_rt.txt	chr12	131226446	12:131710991:C:T:imp:v1	C	T	0.0193794	0.945944	33187	ADD	0.313311	0.0257417	148.141	33.3548	NA	4.42e-34	ADGRD1	rs117528207	0.00444401	148.133
ADGRD1_Q6QNK2_OID30588_v1_Inflammation_II_expo_rt.txt	chr12	131231297	12:131715842:G:A:imp:v1	G	A	0.1592	0.969405	33187	ADD	0.0843828	0.0095813	77.5639	17.8911	NA	1.28e-18	ADGRD1	rs7295155	0.00233172	77.5591
ADGRD1_Q6QNK2_OID30588_v1_Inflammation_II_expo_rt.txt	chr12	131263333	12:131747878:G:C:imp:v1	G	C	0.334531	1.00098	33187	ADD	-0.0558296	0.00731122	58.3108	13.6501	NA	2.24e-14	ADGRD1	rs10773870	0.00175396	58.3073
ADGRD1_Q6QNK2_OID30588_v1_Inflammation_II_expo_rt.txt	chr12	131282191	12:131766736:G:A:imp:v1	G	A	0.0168848	0.847308	33187	ADD	-0.248773	0.0290942	73.1127	16.912	NA	1.22e-17	ADGRD1	rs117883287	0.00219821	73.1084
ADGRD1_Q6QNK2_OID30588_v1_Inflammation_II_expo_rt.txt	chr12	131285479	12:131770024:A:ACCG:imp:v1	A	ACCG	0.882461	0.888448	33187	ADD	-0.0668348	0.0113704	34.5502	8.38153	NA	4.15e-09	ADGRD1	rs13377764	0.00104	34.5484
ADGRD1_Q6QNK2_OID30588_v1_Inflammation_II_expo_rt.txt	chr12	131307236	12:131791781:A:G:imp:v1	A	G	0.886854	0.799061	33187	ADD	0.0741139	0.0121839	37.0021	8.92812	NA	1.18e-09	ADGRD1	rs61937189	0.00111372	36.9999
ADGRD1_Q6QNK2_OID30588_v1_Inflammation_II_expo_rt.txt	chr12	131332315	12:131816860:A:G:imp:v1	A	G	0.0217311	0.705217	33187	ADD	0.244274	0.0281911	75.0814	17.3451	NA	4.52e-18	ADGRD1	rs145712842	0.00225726	75.0765
ADGRD1_Q6QNK2_OID30588_v1_Inflammation_II_expo_rt.txt	chr12	131332629	12:131817174:T:C:imp:v1	T	C	0.516816	0.903318	33187	ADD	-0.0720257	0.007266	98.2617	22.4358	NA	3.67e-23	ADGRD1	rs7954176	0.00295211	98.2558
ADGRD1_Q6QNK2_OID30588_v1_Inflammation_II_expo_rt.txt	chr12	131342147	12:131826692:C:A:imp:v1	C	A	0.0164893	0.996361	33187	ADD	0.199688	0.027151	54.0918	12.7182	NA	1.91e-13	ADGRD1	rs117905979	0.00162726	54.0886
ADGRD1_Q6QNK2_OID30588_v1_Inflammation_II_expo_rt.txt	chr12	131366914	12:131851459:T:C:imp:v1	T	C	0.554907	0.778402	33187	ADD	-0.052605	0.00787214	44.6549	10.6289	NA	2.35e-11	ADGRD1	rs7397678	0.00134374	44.6521
ADGRD1_Q6QNK2_OID30588_v1_Inflammation_II_expo_rt.txt	chr12	131429123	12:131913668:C:G:imp:v1	C	G	0.11613	0.758316	33187	ADD	-0.0681394	0.0123663	30.361	7.4453	NA	3.59e-08	ADGRD1	rs371398662	0.000914012	30.3592
ADGRD1_Q6QNK2_OID30588_v1_Inflammation_II_expo_rt.txt	chr12	131489690	12:131974235:G:A:imp:v1	G	A	0.102926	0.9964	33187	ADD	0.064801	0.0113847	32.398	7.90095	NA	1.26e-08	ADGRD1	rs12307988	0.000975278	32.3962
ADGRD1_Q6QNK2_OID30588_v1_Inflammation_II_expo_rt.txt	chr12	131505888	12:131990433:G:A:imp:v1	G	A	0.0116763	0.993408	33187	ADD	-0.32469	0.0322332	101.468	23.1389	NA	7.26e-24	ADGRD1	rs73156162	0.00304816	101.462
ADGRD1_Q6QNK2_OID30588_v1_Inflammation_II_expo_rt.txt	chr12	131576924	12:132061469:C:T:imp:v1	C	T	0.0468754	0.713924	33187	ADD	0.115104	0.0193232	35.4832	8.58964	NA	2.57e-09	ADGRD1	rs73485593	0.00106805	35.4811
ADGRD1_Q6QNK2_OID30588_v1_Inflammation_II_expo_rt.txt	chr12	131602583	12:132087128:G:A:imp:v1	G	A	0.297971	0.974357	33187	ADD	-0.0417071	0.00764227	29.7835	7.31598	NA	4.83e-08	ADGRD1	rs11246926	0.000896639	29.7817
ADGRD1_Q6QNK2_OID30588_v1_Inflammation_II_expo_rt.txt	chr12	131628929	12:132113474:C:T:imp:v1	C	T	0.419652	0.997464	33187	ADD	-0.0408542	0.00700216	34.0416	8.26804	NA	5.39e-09	ADGRD1	rs34265926	0.0010247	34.0395
ADGRD1_Q6QNK2_OID30588_v1_Inflammation_II_expo_rt.txt	chr12	131629989	12:132114534:T:C:imp:v1	T	C	0.0929453	0.7696	33187	ADD	-0.0766858	0.0135447	32.0546	7.8242	NA	1.5e-08	ADGRD1	rs368164466	0.000964948	32.0527
ADGRD1_Q6QNK2_OID30588_v1_Inflammation_II_expo_rt.txt	chr12	131639779	12:132124324:G:A:imp:v1	G	A	0.497811	0.999815	33187	ADD	-0.0424835	0.00690146	37.8929	9.12647	NA	7.47e-10	ADGRD1	rs12812961	0.0011405	37.8907
ADGRD1_Q6QNK2_OID30588_v1_Inflammation_II_expo_rt.txt	chr12	131669936	12:132154481:A:G:imp:v1	A	G	0.14257	0.997507	33187	ADD	-0.0643691	0.00988346	42.4166	10.1322	NA	7.38e-11	ADGRD1	rs73160723	0.00127648	42.4141
ADGRD1_Q6QNK2_OID30588_v1_Inflammation_II_expo_rt.txt	chr12	131806664	12:132291209:C:T:imp:v1	C	T	0.0483205	0.948763	33187	ADD	-0.141206	0.0165188	73.0723	16.9031	NA	1.25e-17	ADGRD1	rs182226480	0.00219698	73.0673
ADGRD1_Q6QNK2_OID30588_v1_Inflammation_II_expo_rt.txt	chr12	131838537	12:132323082:A:G:imp:v1	A	G	0.646179	0.998591	33187	ADD	0.0580359	0.0072253	64.5181	15.0193	NA	9.57e-16	ADGRD1	rs7971187	0.00194031	64.5142
ADGRE1_Q14246_OID31483_v1_Oncology_II_expo_rt.txt	chr19	6636609	19:6636620:C:T:imp:v1	C	T	0.528222	0.975592	33796	ADD	-0.0422584	0.00751103	31.6539	7.7346	NA	1.84e-08	ADGRE1	rs74174395	0.00093574	31.652
ADGRE1_Q14246_OID31483_v1_Oncology_II_expo_rt.txt	chr19	6832869	19:6832880:A:G:imp:v1	A	G	0.186753	1.00337	33796	ADD	-0.051978	0.00948955	30.0018	7.36488	NA	4.32e-08	ADGRE1	rs11668094	0.000886946	30.0001
ADGRE1_Q14246_OID31483_v1_Oncology_II_expo_rt.txt	chr19	6833061	19:6833072:C:T:imp:v1	C	T	0.707737	0.851694	33796	ADD	0.0658383	0.00882724	55.6298	13.0581	NA	8.75e-14	ADGRE1	rs308200	0.00164334	55.6265
ADGRE1_Q14246_OID31483_v1_Oncology_II_expo_rt.txt	chr19	6857629	19:6857640:C:T:imp:v1	C	T	0.403923	0.921461	33796	ADD	0.0912178	0.00786518	134.506	30.3732	NA	4.23e-31	ADGRE1	rs461970	0.00396416	134.498
ADGRE1_Q14246_OID31483_v1_Oncology_II_expo_rt.txt	chr19	6858857	19:6858868:C:T:imp:v1	C	T	0.0280716	0.957699	33796	ADD	0.193681	0.0229154	71.436	16.543	NA	2.86e-17	ADGRE1	rs112503236	0.00210929	71.4321
ADGRE1_Q14246_OID31483_v1_Oncology_II_expo_rt.txt	chr19	6859263	19:6859274:T:C:imp:v1	T	C	0.0193117	0.757053	33796	ADD	-0.229582	0.0309268	55.1071	12.9426	NA	1.14e-13	ADGRE1	rs9749240	0.00162792	55.1036
ADGRE1_Q14246_OID31483_v1_Oncology_II_expo_rt.txt	chr19	6859694	19:6859705:G:A:imp:v1	G	A	0.0721091	0.928225	33796	ADD	-0.141623	0.014863	90.7935	20.7973	NA	1.59e-21	ADGRE1	rs146666686	0.00267932	90.7881
ADGRE1_Q14246_OID31483_v1_Oncology_II_expo_rt.txt	chr19	6860769	19:6860780:T:C:imp:v1	T	C	0.0115653	0.830744	33796	ADD	0.220129	0.0380105	33.5388	8.15579	NA	6.99e-09	ADGRE1	rs58677367	0.000991405	33.5368
ADGRE1_Q14246_OID31483_v1_Oncology_II_expo_rt.txt	chr19	6873511	19:6873522:T:C:imp:v1	T	C	0.112525	1.00089	33796	ADD	0.443796	0.0117156	1434.94	313.27	NA	0	ADGRE1	rs59055395	0.0407299	1434.87
ADGRE1_Q14246_OID31483_v1_Oncology_II_expo_rt.txt	chr19	6882044	19:6882055:T:C:imp:v1	T	C	0.011895	0.981311	33796	ADD	0.431286	0.0344878	156.387	35.1568	NA	6.97e-36	ADGRE1	rs141307292	0.00460606	156.377
ADGRE1_Q14246_OID31483_v1_Oncology_II_expo_rt.txt	chr19	6883445	19:6883456:G:A:imp:v1	G	A	0.0105862	0.984342	33796	ADD	0.509975	0.0364712	195.522	43.703	NA	1.98e-44	ADGRE1	rs79896953	0.00575211	195.511
ADGRE1_Q14246_OID31483_v1_Oncology_II_expo_rt.txt	chr19	6898670	19:6898681:A:G:imp:v1	A	G	0.0198396	0.988888	33796	ADD	-0.217838	0.026712	66.5053	15.4572	NA	3.49e-16	ADGRE1	rs330883	0.00196397	66.5011
ADGRE1_Q14246_OID31483_v1_Oncology_II_expo_rt.txt	chr19	6913170	19:6913181:A:T:imp:v1	A	T	0.131818	0.993803	33796	ADD	-0.166855	0.0109826	230.814	51.4022	NA	3.96e-52	ADGRE1	rs382818	0.00678339	230.804
ADGRE1_Q14246_OID31483_v1_Oncology_II_expo_rt.txt	chr19	6929756	19:6929767:C:G:imp:v1	C	G	0.438931	0.995091	33796	ADD	-0.166405	0.00748556	494.178	108.755	NA	1.76e-109	ADGRE1	rs10404606	0.0144117	494.15
ADGRE1_Q14246_OID31483_v1_Oncology_II_expo_rt.txt	chr19	6952505	19:6952516:C:T:imp:v1	C	T	0.0188622	0.905968	33796	ADD	-0.541804	0.0286026	358.816	79.2927	NA	5.1e-80	ADGRE1	rs111871982	0.0105056	358.796
ADGRE1_Q14246_OID31483_v1_Oncology_II_expo_rt.txt	chr19	6957691	19:6957702:T:C:imp:v1	T	C	0.0417606	0.992789	33796	ADD	-0.122039	0.0185842	43.1232	10.2891	NA	5.14e-11	ADGRE1	rs76124421	0.00127436	43.1205
ADGRE1_Q14246_OID31483_v1_Oncology_II_expo_rt.txt	chr19	6958455	19:6958466:C:T:imp:v1	C	T	0.0506897	0.967151	33796	ADD	-0.107712	0.0171673	39.3666	9.45438	NA	3.51e-10	ADGRE1	rs141607497	0.00116347	39.3639
ADGRE1_Q14246_OID31483_v1_Oncology_II_expo_rt.txt	chr19	6963084	19:6963095:C:T:imp:v1	C	T	0.011283	0.926142	33796	ADD	0.293091	0.0364597	64.622	15.0422	NA	9.07e-16	ADGRE1	rs149168842	0.00190846	64.6179
ADGRE1_Q14246_OID31483_v1_Oncology_II_expo_rt.txt	chr19	6963270	19:6963281:A:C:imp:v1	A	C	0.0109541	0.925984	33796	ADD	-0.313488	0.0369874	71.8345	16.6307	NA	2.34e-17	ADGRE1	rs8103103	0.00212103	71.8304
ADGRE1_Q14246_OID31483_v1_Oncology_II_expo_rt.txt	chr19	6965883	19:6965894:T:C:imp:v1	T	C	0.0289682	0.962923	33796	ADD	-0.161934	0.0225028	51.7849	12.2081	NA	6.19e-13	ADGRE1	rs113512046	0.00152993	51.7818
ADGRE1_Q14246_OID31483_v1_Oncology_II_expo_rt.txt	chr19	6965985	19:6965996:CA:C:imp:v1	CA	C	0.0992511	0.831553	33796	ADD	-0.11666	0.0135886	73.7046	17.0423	NA	9.07e-18	ADGRE1	rs374973669	0.00217612	73.7002
ADGRE1_Q14246_OID31483_v1_Oncology_II_expo_rt.txt	chr19	6966034	19:6966045:A:G:imp:v1	A	G	0.609633	0.728984	33796	ADD	0.0796276	0.00889193	80.1928	18.469	NA	3.4e-19	ADGRE1	rs35117691	0.00236723	80.188
ADGRE1_Q14246_OID31483_v1_Oncology_II_expo_rt.txt	chr19	6968175	19:6968186:G:A:imp:v1	G	A	0.617499	0.996669	33796	ADD	0.0633934	0.00763343	68.9683	15.9997	NA	1e-16	ADGRE1	rs625183	0.00203656	68.9641
ADGRE1_Q14246_OID31483_v1_Oncology_II_expo_rt.txt	chr19	6968560	19:6968571:C:T:imp:v1	C	T	0.775274	0.72668	33796	ADD	0.0567989	0.010407	29.7874	7.31684	NA	4.82e-08	ADGRE1	rs76351892	0.000880604	29.7854
ADGRE1_Q14246_OID31483_v1_Oncology_II_expo_rt.txt	chr19	6968659	19:6968670:T:G:imp:v1	T	G	0.326621	1.00089	33796	ADD	-0.0534661	0.00789441	45.8689	10.8981	NA	1.26e-11	ADGRE1	rs10401466	0.00135539	45.8661
ADGRE1_Q14246_OID31483_v1_Oncology_II_expo_rt.txt	chr19	6972558	19:6972569:T:C:imp:v1	T	C	0.646457	0.993644	33796	ADD	-0.0572544	0.00777595	54.214	12.7452	NA	1.8e-13	ADGRE1	rs465606	0.00160158	54.2107
ADGRE1_Q14246_OID31483_v1_Oncology_II_expo_rt.txt	chr19	6973308	19:6973319:T:G:imp:v1	T	G	0.930627	0.910108	33796	ADD	-0.0890032	0.0152823	33.9181	8.24048	NA	5.75e-09	ADGRE1	rs252577	0.00100261	33.9163
ADGRE1_Q14246_OID31483_v1_Oncology_II_expo_rt.txt	chr19	7003456	19:7003467:C:T:imp:v1	C	T	0.0581438	0.984437	33796	ADD	0.170752	0.0159511	114.592	26.0147	NA	9.67e-27	ADGRE1	rs7253639	0.00337921	114.584
ADGRE1_Q14246_OID31483_v1_Oncology_II_expo_rt.txt	chr19	7003488	19:7003499:G:T:imp:v1	G	T	0.551981	0.994712	33796	ADD	-0.150665	0.00746924	406.887	89.7583	NA	1.74e-90	ADGRE1	rs7252712	0.0118962	406.861
ADGRE1_Q14246_OID31483_v1_Oncology_II_expo_rt.txt	chr19	7012379	19:7012390:C:T:imp:v1	C	T	0.0161386	0.82863	33796	ADD	-0.180543	0.0322877	31.267	7.64807	NA	2.25e-08	ADGRE1	rs146961153	0.000924315	31.2652
ADGRE1_Q14246_OID31483_v1_Oncology_II_expo_rt.txt	chr19	7016722	19:7016733:C:T:imp:v1	C	T	0.0726045	0.989191	33796	ADD	-0.0966327	0.0143544	45.3185	10.7761	NA	1.67e-11	ADGRE1	rs77024727	0.00133916	45.3161
ADGRE1_Q14246_OID31483_v1_Oncology_II_expo_rt.txt	chr19	7034528	19:7034539:A:C:imp:v1	A	C	0.131626	0.85955	33796	ADD	0.0834947	0.0118118	49.9674	11.806	NA	1.56e-12	ADGRE1	rs181477054	0.00147631	49.9643
ADGRE1_Q14246_OID31483_v1_Oncology_II_expo_rt.txt	chr19	7051864	19:7051875:G:C:imp:v1	G	C	0.089983	0.809758	33796	ADD	-0.0929472	0.0143895	41.7233	9.97819	NA	1.05e-10	ADGRE1	rs149472974	0.00123305	41.7211
ADGRE1_Q14246_OID31483_v1_Oncology_II_expo_rt.txt	chr19	7055083	19:7055094:T:C:imp:v1	T	C	0.271255	0.869054	33796	ADD	-0.0792013	0.00893371	78.5961	18.1181	NA	7.62e-19	ADGRE1	rs2967641	0.00232021	78.5914
ADGRE1_Q14246_OID31483_v1_Oncology_II_expo_rt.txt	chr19	7063866	19:7063877:C:T:imp:v1	C	T	0.0292573	0.912184	33796	ADD	0.232335	0.0230189	101.873	23.2277	NA	5.92e-24	ADGRE1	rs147448542	0.0030053	101.867
ADGRE1_Q14246_OID31483_v1_Oncology_II_expo_rt.txt	chr19	7072745	19:7072756:G:C:imp:v1	G	C	0.0274365	0.900219	33796	ADD	-0.131625	0.0238955	30.3419	7.44104	NA	3.62e-08	ADGRE1	rs74634965	0.000896994	30.3402
ADGRE1_Q14246_OID31483_v1_Oncology_II_expo_rt.txt	chr19	7102085	19:7102096:C:CT:imp:v1	C	CT	0.804251	0.931243	33796	ADD	-0.0564276	0.00967467	34.0182	8.26281	NA	5.46e-09	ADGRE1	rs200854179	0.00100556	34.0161
ADGRE1_Q14246_OID31483_v1_Oncology_II_expo_rt.txt	chr19	7114277	19:7114288:C:T:imp:v1	C	T	0.615035	0.963921	33796	ADD	-0.0493541	0.00775684	40.4835	9.70271	NA	1.98e-10	ADGRE1	rs3745551	0.00119644	40.481
ADGRE1_Q14246_OID31483_v1_Oncology_II_expo_rt.txt	chr19	7126149	19:7126160:A:G:imp:v1	A	G	0.0195113	0.933017	33796	ADD	0.154998	0.0277289	31.2453	7.64322	NA	2.27e-08	ADGRE1	rs77357340	0.000923677	31.2436
ADGRE1_Q14246_OID31483_v1_Oncology_II_expo_rt.txt	chr19	7129970	19:7129981:C:T:imp:v1	C	T	0.033793	0.94154	33796	ADD	0.12459	0.021136	34.7473	8.4255	NA	3.75e-09	ADGRE1	rs78984106	0.00102709	34.7452
ADGRE1_Q14246_OID31483_v1_Oncology_II_expo_rt.txt	chr19	7134142	19:7134153:T:G:imp:v1	T	G	0.597183	0.927574	33796	ADD	-0.0467892	0.00784184	35.6005	8.61578	NA	2.42e-09	ADGRE1	rs4804071	0.00105228	35.5983
ADGRE2_Q9UHX3_OID20755_v1_Inflammation_expo_rt.txt	chr19	14162113	19:14272925:C:A:imp:v1	C	A	0.0323062	0.999691	33848	ADD	-0.134857	0.0205479	43.0737	10.2781	NA	5.27e-11	ADGRE2	rs34711827	0.00127095	43.0711
ADGRE2_Q9UHX3_OID20755_v1_Inflammation_expo_rt.txt	chr19	14238790	19:14349602:G:A:imp:v1	G	A	0.673515	0.908232	33848	ADD	-0.076036	0.00812773	87.5186	20.0784	NA	8.35e-21	ADGRE2	rs10420711	0.00257896	87.5134
ADGRE2_Q9UHX3_OID20755_v1_Inflammation_expo_rt.txt	chr19	14240762	19:14351574:C:T:imp:v1	C	T	0.0928711	1.00809	33848	ADD	-0.0739371	0.0124682	35.1655	8.51879	NA	3.03e-09	ADGRE2	rs4528684	0.00103785	35.1635
ADGRE2_Q9UHX3_OID20755_v1_Inflammation_expo_rt.txt	chr19	14267329	19:14378141:C:T:imp:v1	C	T	0.0964936	0.856892	33848	ADD	-0.0827634	0.0132802	38.8392	9.33706	NA	4.6e-10	ADGRE2	rs17180958	0.00114614	38.8366
ADGRE2_Q9UHX3_OID20755_v1_Inflammation_expo_rt.txt	chr19	14279136	19:14389948:G:A:imp:v1	G	A	0.251255	0.991338	33848	ADD	0.0529026	0.00840662	39.6014	9.50659	NA	3.11e-10	ADGRE2	rs645554	0.00116861	39.5991
ADGRE2_Q9UHX3_OID20755_v1_Inflammation_expo_rt.txt	chr19	14292635	19:14403447:T:C:imp:v1	T	C	0.13185	0.932215	33848	ADD	0.070258	0.0111143	39.9603	9.5864	NA	2.59e-10	ADGRE2	rs41290976	0.00117918	39.9578
ADGRE2_Q9UHX3_OID20755_v1_Inflammation_expo_rt.txt	chr19	14358920	19:14469732:C:T:imp:v1	C	T	0.379271	0.963637	33848	ADD	-0.0653138	0.00762228	73.4243	16.9806	NA	1.05e-17	ADGRE2	rs12608997	0.00216454	73.42
ADGRE2_Q9UHX3_OID20755_v1_Inflammation_expo_rt.txt	chr19	14359881	19:14470693:T:C:imp:v1	T	C	0.912093	0.952891	33848	ADD	-0.198642	0.0131329	228.783	50.9593	NA	1.1e-51	ADGRE2	rs7259323	0.00671371	228.768
ADGRE2_Q9UHX3_OID20755_v1_Inflammation_expo_rt.txt	chr19	14373402	19:14484214:G:A:imp:v1	G	A	0.0177462	0.771251	33848	ADD	-0.222113	0.0313065	50.336	11.8876	NA	1.3e-12	ADGRE2	rs185486549	0.00148491	50.3331
ADGRE2_Q9UHX3_OID20755_v1_Inflammation_expo_rt.txt	chr19	14375732	19:14486544:A:G:imp:v1	A	G	0.0619534	0.994959	33848	ADD	0.218451	0.0150993	209.313	46.7122	NA	1.94e-47	ADGRE2	rs58881629	0.00614588	209.3
ADGRE2_Q9UHX3_OID20755_v1_Inflammation_expo_rt.txt	chr19	14380508	19:14491320:T:C:imp:v1	T	C	0.085993	0.953742	33848	ADD	-0.110077	0.0132616	68.897	15.984	NA	1.04e-16	ADGRE2	rs12609652	0.00203135	68.8931
ADGRE2_Q9UHX3_OID20755_v1_Inflammation_expo_rt.txt	chr19	14380861	19:14491673:G:C:imp:v1	G	C	0.321245	0.91064	33848	ADD	0.181026	0.00814664	493.769	108.666	NA	2.16e-109	ADGRE2	rs888875	0.0143781	493.741
ADGRE2_Q9UHX3_OID20755_v1_Inflammation_expo_rt.txt	chr19	14388596	19:14499408:G:A:imp:v1	G	A	0.0152156	0.862106	33848	ADD	-0.2603	0.0319368	66.43	15.4407	NA	3.62e-16	ADGRE2	rs191910050	0.00195876	66.4263
ADGRE2_Q9UHX3_OID20755_v1_Inflammation_expo_rt.txt	chr19	14388804	19:14499616:C:T:imp:v1	C	T	0.0170763	0.993188	33848	ADD	0.769189	0.0281247	747.981	163.958	NA	1.1e-164	ADGRE2	rs139113505	0.0216204	747.936
ADGRE2_Q9UHX3_OID20755_v1_Inflammation_expo_rt.txt	chr19	14389456	19:14500268:G:T:imp:v1	G	T	0.398768	0.86102	33848	ADD	0.188076	0.00799262	553.717	121.709	NA	1.95e-122	ADGRE2	rs67426584	0.0160956	553.685
ADGRE2_Q9UHX3_OID20755_v1_Inflammation_expo_rt.txt	chr19	14391241	19:14502053:C:T:imp:v1	C	T	0.0264354	0.905012	33848	ADD	-0.201563	0.0238067	71.684	16.5976	NA	2.53e-17	ADGRE2	rs149215083	0.00211335	71.6799
ADGRE2_Q9UHX3_OID20755_v1_Inflammation_expo_rt.txt	chr19	14394927	19:14505739:G:C:imp:v1	G	C	0.140084	0.934236	33848	ADD	-0.159333	0.0108233	216.716	48.3273	NA	4.71e-49	ADGRE2	rs3826759	0.00636191	216.704
ADGRE2_Q9UHX3_OID20755_v1_Inflammation_expo_rt.txt	chr19	14396179	19:14506991:A:C:imp:v1	A	C	0.75291	0.999121	33848	ADD	0.287087	0.00842229	1161.89	253.932	NA	1.17e-254	ADGRE2	rs7251607	0.0331876	1161.83
ADGRE2_Q9UHX3_OID20755_v1_Inflammation_expo_rt.txt	chr19	14398440	19:14509252:T:C:imp:v1	T	C	0.0174737	0.908203	33848	ADD	0.293299	0.0290808	101.721	23.1943	NA	6.39e-24	ADGRE2	rs146609992	0.00299621	101.714
ADGRE2_Q9UHX3_OID20755_v1_Inflammation_expo_rt.txt	chr19	14399301	19:14510113:G:A:imp:v1	G	A	0.0459636	0.882269	33848	ADD	0.108393	0.0184692	34.4433	8.35769	NA	4.39e-09	ADGRE2	rs138968912	0.00101656	34.4414
ADGRE2_Q9UHX3_OID20755_v1_Inflammation_expo_rt.txt	chr19	14410017	19:14520829:G:A:imp:v1	G	A	0.0979112	0.946025	33848	ADD	0.187994	0.0125602	224.024	49.9214	NA	1.2e-50	ADGRE2	rs12461754	0.00657502	224.011
ADGRE2_Q9UHX3_OID20755_v1_Inflammation_expo_rt.txt	chr19	14412066	19:14522878:C:T:imp:v1	C	T	0.0232598	0.949448	33848	ADD	-0.153973	0.0247236	38.7851	9.32503	NA	4.73e-10	ADGRE2	rs118125020	0.00114455	38.7829
ADGRE2_Q9UHX3_OID20755_v1_Inflammation_expo_rt.txt	chr19	14417814	19:14528626:C:T:imp:v1	C	T	0.0393711	0.974239	33848	ADD	-0.166349	0.0189161	77.3357	17.8409	NA	1.44e-18	ADGRE2	rs117723781	0.00227957	77.3306
ADGRE2_Q9UHX3_OID20755_v1_Inflammation_expo_rt.txt	chr19	14431479	19:14542291:T:G:imp:v1	T	G	0.308486	0.983854	33848	ADD	0.0489711	0.00792992	38.1367	9.18073	NA	6.6e-10	ADGRE2	rs8104877	0.00112543	38.1344
ADGRE2_Q9UHX3_OID20755_v1_Inflammation_expo_rt.txt	chr19	14441706	19:14552518:A:G:imp:v1	A	G	0.720885	1.00074	33848	ADD	-0.0570977	0.00809318	49.7736	11.7631	NA	1.73e-12	ADGRE2	rs1019474	0.00146834	49.7706
ADGRE2_Q9UHX3_OID20755_v1_Inflammation_expo_rt.txt	chr19	14497145	19:14607957:C:T:imp:v1	C	T	0.0535925	1.00453	33848	ADD	0.123594	0.0160889	59.0123	13.805	NA	1.57e-14	ADGRE2	rs117132863	0.00174041	59.0087
ADGRE2_Q9UHX3_OID20755_v1_Inflammation_expo_rt.txt	chr19	14503901	19:14614713:A:G:imp:v1	A	G	0.46253	0.980006	33848	ADD	0.0449959	0.00736373	37.3379	9.0029	NA	9.93e-10	ADGRE2	rs10402830	0.00110189	37.3357
ADGRE5_P48960_OID20260_v1_Cardiometabolic_expo_rt.txt	chr19	13988217	19:14099029:G:A:imp:v1	G	A	0.0106956	0.924385	33898	ADD	-0.222925	0.0364761	37.3509	9.00578	NA	9.87e-10	ADGRE5	rs149938265	0.00110065	37.3487
ADGRE5_P48960_OID20260_v1_Cardiometabolic_expo_rt.txt	chr19	14238790	19:14349602:G:A:imp:v1	G	A	0.673668	0.907868	33898	ADD	-0.0524098	0.00807803	42.0934	10.0604	NA	8.7e-11	ADGRE5	rs10420711	0.00124023	42.0909
ADGRE5_P48960_OID20260_v1_Cardiometabolic_expo_rt.txt	chr19	14284676	19:14395488:C:T:imp:v1	C	T	0.140621	0.879474	33898	ADD	-0.0697876	0.0110657	39.7739	9.54495	NA	2.85e-10	ADGRE5	rs139456596	0.00117197	39.7716
ADGRE5_P48960_OID20260_v1_Cardiometabolic_expo_rt.txt	chr19	14304447	19:14415259:T:G:imp:v1	T	G	0.148598	0.991394	33898	ADD	-0.0950021	0.0101893	86.9307	19.9493	NA	1.12e-20	ADGRE5	rs73513642	0.00255795	86.9265
ADGRE5_P48960_OID20260_v1_Cardiometabolic_expo_rt.txt	chr19	14332925	19:14443737:A:G:imp:v1	A	G	0.483742	0.865287	33898	ADD	0.0555053	0.00776026	51.1582	12.0695	NA	8.52e-13	ADGRE5	rs10415866	0.00150691	51.1553
ADGRE5_P48960_OID20260_v1_Cardiometabolic_expo_rt.txt	chr19	14343515	19:14454327:C:T:imp:v1	C	T	0.0829309	0.860709	33898	ADD	0.119505	0.0140973	71.8628	16.637	NA	2.31e-17	ADGRE5	rs62125481	0.00211547	71.8579
ADGRE5_P48960_OID20260_v1_Cardiometabolic_expo_rt.txt	chr19	14346638	19:14457450:C:A:imp:v1	C	A	0.0601798	0.994053	33898	ADD	-0.106511	0.0152204	48.9705	11.5853	NA	2.6e-12	ADGRE5	rs79763471	0.00144257	48.9679
ADGRE5_P48960_OID20260_v1_Cardiometabolic_expo_rt.txt	chr19	14364272	19:14475084:C:G:imp:v1	C	G	0.347891	0.967902	33898	ADD	-0.0447741	0.00769749	33.8341	8.22173	NA	6e-09	ADGRE5	rs2420850	0.000997122	33.8322
ADGRE5_P48960_OID20260_v1_Cardiometabolic_expo_rt.txt	chr19	14380508	19:14491320:T:C:imp:v1	T	C	0.0859708	0.95388	33898	ADD	-0.106425	0.0131773	65.2278	15.1757	NA	6.67e-16	ADGRE5	rs12609652	0.00192055	65.2242
ADGRE5_P48960_OID20260_v1_Cardiometabolic_expo_rt.txt	chr19	14381407	19:14492219:C:A:imp:v1	C	A	0.0955939	0.897939	33898	ADD	0.203337	0.0129481	246.615	54.8476	NA	1.42e-55	ADGRE5	rs28366013	0.00722268	246.601
ADGRE5_P48960_OID20260_v1_Cardiometabolic_expo_rt.txt	chr19	14381460	19:14492272:T:C:imp:v1	T	C	0.369612	0.880679	33898	ADD	0.0933274	0.00796262	137.374	31.0006	NA	9.99e-32	ADGRE5	rs2302996	0.00403623	137.366
ADGRE5_P48960_OID20260_v1_Cardiometabolic_expo_rt.txt	chr19	14388638	19:14499450:C:G:imp:v1	C	G	0.0862422	0.889212	33898	ADD	-0.139101	0.0136242	104.24	23.7465	NA	1.79e-24	ADGRE5	rs35363541	0.00306571	104.235
ADGRE5_P48960_OID20260_v1_Cardiometabolic_expo_rt.txt	chr19	14388804	19:14499616:C:T:imp:v1	C	T	0.0169479	0.993384	33898	ADD	-0.715177	0.0280463	650.244	142.704	NA	1.98e-143	ADGRE5	rs139113505	0.0188213	650.205
ADGRE5_P48960_OID20260_v1_Cardiometabolic_expo_rt.txt	chr19	14397573	19:14508385:G:A:imp:v1	G	A	0.499451	0.985314	33898	ADD	0.105534	0.00727182	210.618	46.997	NA	1.01e-47	ADGRE5	rs10410071	0.00617496	210.607
ADGRE5_P48960_OID20260_v1_Cardiometabolic_expo_rt.txt	chr19	14398440	19:14509252:T:C:imp:v1	T	C	0.0174857	0.90803	33898	ADD	-0.16038	0.0288887	30.8208	7.54824	NA	2.83e-08	ADGRE5	rs146609992	0.000908397	30.819
ADGRE5_P48960_OID20260_v1_Cardiometabolic_expo_rt.txt	chr19	14405945	19:14516757:G:A:imp:v1	G	A	0.0183584	0.921511	33898	ADD	-0.196105	0.0279974	49.0615	11.6054	NA	2.48e-12	ADGRE5	rs45442397	0.00144524	49.0587
ADGRE5_P48960_OID20260_v1_Cardiometabolic_expo_rt.txt	chr19	14425936	19:14536748:G:A:imp:v1	G	A	0.0376276	1.00163	33898	ADD	-0.131275	0.018951	47.9848	11.367	NA	4.3e-12	ADGRE5	rs117264907	0.00141355	47.9815
ADGRE5_P48960_OID20260_v1_Cardiometabolic_expo_rt.txt	chr19	14464647	19:14575459:A:G:imp:v1	A	G	0.462178	0.999062	33898	ADD	0.0439156	0.00724196	36.7726	8.877	NA	1.33e-09	ADGRE5	rs6511933	0.00108363	36.7705
ADGRE5_P48960_OID20260_v1_Cardiometabolic_expo_rt.txt	chr19	14471656	19:14582468:G:A:imp:v1	G	A	0.0951182	0.963586	33898	ADD	-0.0757168	0.0125259	36.5396	8.82508	NA	1.5e-09	ADGRE5	rs10846	0.00107677	36.5377
ADGRE5_P48960_OID20260_v1_Cardiometabolic_expo_rt.txt	chr19	14485359	19:14596171:A:T:imp:v1	A	T	0.469978	0.974443	33898	ADD	0.0406658	0.00732704	30.8036	7.54439	NA	2.86e-08	ADGRE5	rs1187810	0.000907889	30.8018
ADGRE5_P48960_OID20260_v1_Cardiometabolic_expo_rt.txt	chr19	14497145	19:14607957:C:T:imp:v1	C	T	0.0535872	1.00329	33898	ADD	0.0993477	0.0159969	38.5694	9.27704	NA	5.28e-10	ADGRE5	rs117132863	0.00113652	38.5672
ADGRE5_P48960_OID20260_v1_Cardiometabolic_expo_rt.txt	chr19	14547118	19:14657930:A:T:imp:v1	A	T	0.134304	0.866312	33898	ADD	0.0711966	0.0113703	39.2082	9.41914	NA	3.81e-10	ADGRE5	rs79553685	0.00115531	39.2057
ADGRG1_Q9Y653_OID21294_v1_Oncology_expo_rt.txt	chr16	57605741	16:57639653:G:A:imp:v1	G	A	0.0384081	0.989077	33533	ADD	-0.119513	0.0187476	40.6387	9.73721	NA	1.83e-10	ADGRG1	rs71383252	0.00121043	40.6362
ADGRG1_Q9Y653_OID21294_v1_Oncology_expo_rt.txt	chr16	57607054	16:57640966:C:T:imp:v1	C	T	0.299812	0.983366	33533	ADD	-0.0532449	0.00788704	45.5752	10.833	NA	1.47e-11	ADGRG1	rs11076197	0.00135727	45.5724
ADGRG1_Q9Y653_OID21294_v1_Oncology_expo_rt.txt	chr16	57626796	16:57660708:G:A:imp:v1	G	A	0.477795	0.988894	33533	ADD	-0.0414507	0.00721612	32.9957	8.03449	NA	9.24e-09	ADGRG1	rs8047279	0.000983007	32.9936
ADGRG1_Q9Y653_OID21294_v1_Oncology_expo_rt.txt	chr16	57630418	16:57664330:T:C:imp:v1	T	C	0.324128	1.00681	33533	ADD	0.0490171	0.00763106	41.2597	9.8752	NA	1.33e-10	ADGRG1	rs12448358	0.00122891	41.2572
ADGRG1_Q9Y653_OID21294_v1_Oncology_expo_rt.txt	chr16	57644877	16:57678789:T:C:imp:v1	T	C	0.0993194	0.988923	33533	ADD	-0.0823557	0.0120575	46.6524	11.0718	NA	8.48e-12	ADGRG1	rs12596286	0.0013893	46.6495
ADGRG1_Q9Y653_OID21294_v1_Oncology_expo_rt.txt	chr16	57648363	16:57682275:C:T:imp:v1	C	T	0.406603	0.985374	33533	ADD	0.0710144	0.00735137	93.316	21.3509	NA	4.46e-22	ADGRG1	rs733464	0.00277509	93.3105
ADGRG1_Q9Y653_OID21294_v1_Oncology_expo_rt.txt	chr16	57659586	16:57693498:T:C:imp:v1	T	C	0.0384547	1.00598	33533	ADD	-0.127858	0.0185852	47.3285	11.2216	NA	6e-12	ADGRG1	rs17379472	0.00140941	47.3255
ADGRG1_Q9Y653_OID21294_v1_Oncology_expo_rt.txt	chr16	57662233	16:57696145:C:A:imp:v1	C	A	0.0735863	0.956256	33533	ADD	0.0885905	0.0140356	39.8391	9.55946	NA	2.76e-10	ADGRG1	rs8049441	0.00118665	39.837
ADGRG1_Q9Y653_OID21294_v1_Oncology_expo_rt.txt	chr16	57668793	16:57702705:A:G:imp:v1	A	G	0.76073	0.994106	33533	ADD	-0.0459629	0.00842641	29.7528	7.30911	NA	4.91e-08	ADGRG1	rs7201400	0.000886486	29.7512
ADH1B_P00325_OID30612_v1_Inflammation_II_expo_rt.txt	chr4	99302913	4:100224070:G:A:imp:v1	G	A	0.0109462	0.916575	33187	ADD	-0.20602	0.0370623	30.8996	7.56587	NA	2.72e-08	ADH1B	rs13132430	0.000930212	30.8978
ADH1B_P00325_OID30612_v1_Inflammation_II_expo_rt.txt	chr4	99318162	4:100239319:T:C:imp:v1	T	C	0.97728	0.995751	33187	ADD	0.24475	0.0248901	96.6924	22.0916	NA	8.1e-23	ADH1B	rs1229984	0.0029051	96.6865
ADH1B_P00325_OID30612_v1_Inflammation_II_expo_rt.txt	chr4	99392454	4:100313611:G:A:imp:v1	G	A	0.476698	0.980371	33187	ADD	0.0512212	0.00746406	47.0923	11.1693	NA	6.77e-12	ADH1B	rs284783	0.00141699	47.0894
ADH4_P08319_OID20117_v1_Cardiometabolic_expo_rt.txt	chr4	98851396	4:99772547:A:C:imp:v1	A	C	0.832898	0.990297	33043	ADD	0.0641024	0.00980981	42.7	10.1951	NA	6.38e-11	ADH4	rs10446681	0.00129059	42.6974
ADH4_P08319_OID20117_v1_Cardiometabolic_expo_rt.txt	chr4	98895008	4:99816159:G:A:imp:v1	G	A	0.198622	0.900929	33043	ADD	-0.0538675	0.00961197	31.4072	7.67942	NA	2.09e-08	ADH4	rs72692635	0.000949591	31.4053
ADH4_P08319_OID20117_v1_Cardiometabolic_expo_rt.txt	chr4	98980406	4:99901557:TTTTTCTTTTCTTTTC:T:imp:v1	TTTTTCTTTTCTTTTC	T	0.665054	0.984201	33043	ADD	0.0901278	0.00777785	134.276	30.3229	NA	4.75e-31	ADH4	rs61538297	0.00404723	134.268
ADH4_P08319_OID20117_v1_Cardiometabolic_expo_rt.txt	chr4	99144358	4:100065509:T:G:imp:v1	T	G	0.613069	1.00331	33043	ADD	0.130044	0.00746332	303.611	67.2689	NA	5.38e-68	ADH4	rs1800759	0.00910468	303.592
ADH4_P08319_OID20117_v1_Cardiometabolic_expo_rt.txt	chr4	99222027	4:100143184:G:A:imp:v1	G	A	0.726311	0.99633	33043	ADD	-0.0665187	0.00818434	66.0574	15.3585	NA	4.38e-16	ADH4	rs6830685	0.00199514	66.0532
ADH4_P08319_OID20117_v1_Cardiometabolic_expo_rt.txt	chr4	99242390	4:100163547:C:T:imp:v1	C	T	0.107472	0.992491	33043	ADD	-0.0793688	0.0118026	45.2211	10.7545	NA	1.76e-11	ADH4	rs34600299	0.00136669	45.2187
ADH4_P08319_OID20117_v1_Cardiometabolic_expo_rt.txt	chr4	99273868	4:100195025:A:G:imp:v1	A	G	0.0676962	1.00244	33043	ADD	-0.12147	0.0144727	70.4428	16.3244	NA	4.74e-17	ADH4	rs72679878	0.00212733	70.4389
ADIPOQ_Q15848_OID30748_v1_Inflammation_II_expo_rt.txt	chr3	186477741	3:186195530:T:A:imp:v1	T	A	0.0374516	0.978601	33995	ADD	-0.112566	0.0172797	42.4367	10.1366	NA	7.3e-11	ADIPOQ	rs78193714	0.00124677	42.4342
ADIPOQ_Q15848_OID30748_v1_Inflammation_II_expo_rt.txt	chr3	186488542	3:186206331:C:G:imp:v1	C	G	0.683389	0.992493	33995	ADD	0.0475932	0.00700644	46.1419	10.9586	NA	1.1e-11	ADIPOQ	rs9829553	0.00135547	46.1391
ADIPOQ_Q15848_OID30748_v1_Inflammation_II_expo_rt.txt	chr3	186621080	3:186338869:C:T:imp:v1	C	T	0.0751875	1.00246	33995	ADD	0.0774476	0.0122924	39.6957	9.52758	NA	2.97e-10	ADIPOQ	rs11540663	0.00116633	39.6933
ADIPOQ_Q15848_OID30748_v1_Inflammation_II_expo_rt.txt	chr3	186628483	3:186346272:G:A:imp:v1	G	A	0.229166	0.934982	33995	ADD	-0.0618516	0.00798819	59.9522	14.0124	NA	9.72e-15	ADIPOQ	rs73061438	0.00176045	59.9487
ADIPOQ_Q15848_OID30748_v1_Inflammation_II_expo_rt.txt	chr3	186687192	3:186404981:G:A:imp:v1	G	A	0.33136	0.991368	33995	ADD	-0.0455606	0.0069269	43.2614	10.3197	NA	4.79e-11	ADIPOQ	rs3856929	0.00127096	43.2589
ADIPOQ_Q15848_OID30748_v1_Inflammation_II_expo_rt.txt	chr3	186730456	3:186448245:T:C:imp:v1	T	C	0.376259	0.987802	33995	ADD	-0.0560994	0.00674079	69.2618	16.0644	NA	8.62e-17	ADIPOQ	rs13098645	0.00203327	69.2579
ADIPOQ_Q15848_OID30748_v1_Inflammation_II_expo_rt.txt	chr3	186745554	3:186463343:G:A:imp:v1	G	A	0.137257	0.987987	33995	ADD	-0.0877098	0.00948831	85.4512	19.6244	NA	2.37e-20	ADIPOQ	rs1972703	0.00250734	85.4462
ADIPOQ_Q15848_OID30748_v1_Inflammation_II_expo_rt.txt	chr3	186745590	3:186463379:A:AACGACTC:imp:v1	A	AACGACTC	0.62124	0.988866	33995	ADD	0.0492443	0.00673495	53.4617	12.5789	NA	2.64e-13	ADIPOQ	rs201296141	0.00157017	53.4586
ADIPOQ_Q15848_OID30748_v1_Inflammation_II_expo_rt.txt	chr3	186759364	3:186477153:A:C:imp:v1	A	C	0.414385	0.898139	33995	ADD	0.0473203	0.00695537	46.2865	10.9907	NA	1.02e-11	ADIPOQ	rs13069240	0.00135972	46.2838
ADIPOQ_Q15848_OID30748_v1_Inflammation_II_expo_rt.txt	chr3	186763387	3:186481176:T:G:imp:v1	T	G	0.662538	0.984016	33995	ADD	-0.0841315	0.00692129	147.755	33.2704	NA	5.37e-34	ADIPOQ	rs13073535	0.00432758	147.747
ADIPOQ_Q15848_OID30748_v1_Inflammation_II_expo_rt.txt	chr3	186773749	3:186491538:C:G:imp:v1	C	G	0.405192	1.00704	33995	ADD	-0.0878401	0.00658666	177.85	39.8452	NA	1.43e-40	ADIPOQ	rs62294442	0.00520444	177.84
ADIPOQ_Q15848_OID30748_v1_Inflammation_II_expo_rt.txt	chr3	186788141	3:186505930:C:T:imp:v1	C	T	0.0483748	1.00029	33995	ADD	-0.101927	0.0151273	45.3997	10.7941	NA	1.61e-11	ADIPOQ	rs17299991	0.00133371	45.3973
ADIPOQ_Q15848_OID30748_v1_Inflammation_II_expo_rt.txt	chr3	186829071	3:186546860:C:T:imp:v1	C	T	0.019112	0.955901	33995	ADD	-0.145515	0.0242551	35.992	8.70305	NA	1.98e-09	ADIPOQ	rs77772668	0.00105763	35.9902
ADIPOQ_Q15848_OID30748_v1_Inflammation_II_expo_rt.txt	chr3	186832874	3:186550663:A:G:imp:v1	A	G	0.855076	0.990344	33995	ADD	-0.0794724	0.00928049	73.3316	16.9602	NA	1.1e-17	ADIPOQ	rs266773	0.00215248	73.3272
ADIPOQ_Q15848_OID30748_v1_Inflammation_II_expo_rt.txt	chr3	186833172	3:186550961:A:G:imp:v1	A	G	0.333115	0.997917	33995	ADD	-0.126638	0.00689425	337.407	74.6303	NA	2.34e-75	ADIPOQ	rs1648705	0.00982765	337.387
ADIPOQ_Q15848_OID30748_v1_Inflammation_II_expo_rt.txt	chr3	186834099	3:186551888:C:T:imp:v1	C	T	0.0259864	0.999167	33995	ADD	-0.614829	0.0204078	907.647	198.67	NA	2.14e-199	ADIPOQ	rs143257534	0.0260051	907.592
ADIPOQ_Q15848_OID30748_v1_Inflammation_II_expo_rt.txt	chr3	186840614	3:186558403:G:C:imp:v1	G	C	0.0805449	0.985406	33995	ADD	0.335902	0.0120145	781.656	171.28	NA	5.25e-172	ADIPOQ	rs73185701	0.0224764	781.607
ADIPOQ_Q15848_OID30748_v1_Inflammation_II_expo_rt.txt	chr3	186853334	3:186571123:G:T:imp:v1	G	T	0.257019	0.995003	33995	ADD	0.113963	0.0074476	234.148	52.1293	NA	7.43e-53	ADIPOQ	rs1501299	0.00684068	234.137
ADIPOQ_Q15848_OID30748_v1_Inflammation_II_expo_rt.txt	chr3	186868953	3:186586742:G:A:imp:v1	G	A	0.71297	0.958046	33995	ADD	0.110037	0.00733123	225.281	50.1955	NA	6.38e-51	ADIPOQ	rs4686806	0.00658325	225.267
ADIPOQ_Q15848_OID30748_v1_Inflammation_II_expo_rt.txt	chr3	186871186	3:186588975:C:T:imp:v1	C	T	0.0103115	0.90981	33995	ADD	-0.194049	0.0336954	33.1653	8.07237	NA	8.47e-09	ADIPOQ	rs144033072	0.000974637	33.1632
ADIPOQ_Q15848_OID30748_v1_Inflammation_II_expo_rt.txt	chr3	186884844	3:186602633:A:G:imp:v1	A	G	0.228075	0.833304	33995	ADD	-0.0999252	0.00847451	139.034	31.3635	NA	4.33e-32	ADIPOQ	rs7645946	0.00407318	139.026
ADIPOQ_Q15848_OID30748_v1_Inflammation_II_expo_rt.txt	chr3	186890077	3:186607866:G:A:imp:v1	G	A	0.0220808	0.854579	33995	ADD	-0.152466	0.0238943	40.7155	9.75427	NA	1.76e-10	ADIPOQ	rs150024939	0.00119625	40.7129
ADIPOQ_Q15848_OID30748_v1_Inflammation_II_expo_rt.txt	chr3	186890826	3:186608615:T:A:imp:v1	T	A	0.0201109	0.886657	33995	ADD	-0.153167	0.0245514	38.9201	9.35505	NA	4.42e-10	ADIPOQ	rs113365229	0.00114358	38.9182
ADIPOQ_Q15848_OID30748_v1_Inflammation_II_expo_rt.txt	chr3	186931416	3:186649205:A:G:imp:v1	A	G	0.0225848	0.970989	33995	ADD	-0.13721	0.0221706	38.3017	9.21745	NA	6.06e-10	ADIPOQ	rs139079705	0.00112542	38.2993
ADM_P35318_OID21467_v1_Oncology_expo_rt.txt	chr11	9554974	11:9576521:G:T:imp:v1	G	T	0.369655	0.910432	33966	ADD	0.0477741	0.00764131	39.0885	9.39252	NA	4.05e-10	ADM	rs71476836	0.00114949	39.0862
ADM_P35318_OID21467_v1_Oncology_expo_rt.txt	chr11	9761173	11:9782720:C:T:imp:v1	C	T	0.0656717	0.951057	33966	ADD	-0.0946597	0.0145763	42.1733	10.0781	NA	8.35e-11	ADM	rs147104010	0.00124009	42.1706
ADM_P35318_OID21467_v1_Oncology_expo_rt.txt	chr11	9779054	11:9800601:G:A:imp:v1	G	A	0.627074	0.985393	33966	ADD	-0.0766133	0.00733462	109.107	24.8131	NA	1.54e-25	ADM	rs10118	0.00320196	109.101
ADM_P35318_OID21467_v1_Oncology_expo_rt.txt	chr11	9805245	11:9826792:C:CA:imp:v1	C	CA	0.450665	0.872668	33966	ADD	0.0432766	0.00757671	32.6246	7.9516	NA	1.12e-08	ADM	rs374916401	0.000959585	32.6227
ADM_P35318_OID21467_v1_Oncology_expo_rt.txt	chr11	9865123	11:9886670:C:T:imp:v1	C	T	0.0455596	0.959599	33966	ADD	0.0950393	0.0172336	30.4126	7.45686	NA	3.49e-08	ADM	rs79213491	0.000894584	30.4109
ADM_P35318_OID21467_v1_Oncology_expo_rt.txt	chr11	9867856	11:9889403:T:C:imp:v1	T	C	0.385152	0.992602	33966	ADD	0.0862398	0.00726	141.105	31.8164	NA	1.53e-32	ADM	rs61876914	0.00413711	141.097
ADM_P35318_OID21467_v1_Oncology_expo_rt.txt	chr11	9918895	11:9940442:C:T:imp:v1	C	T	0.723952	0.995619	33966	ADD	0.0811629	0.00789248	105.752	24.078	NA	8.36e-25	ADM	rs7937240	0.0031038	105.746
ADM_P35318_OID21467_v1_Oncology_expo_rt.txt	chr11	9930646	11:9952193:C:A:imp:v1	C	A	0.180315	0.996393	33966	ADD	-0.0909319	0.00917399	98.2464	22.4325	NA	3.69e-23	ADM	rs10840328	0.00288415	98.2405
ADM_P35318_OID21467_v1_Oncology_expo_rt.txt	chr11	9935957	11:9957504:G:C:imp:v1	G	C	0.0236598	0.988069	33966	ADD	-0.150522	0.0232997	41.7349	9.98078	NA	1.05e-10	ADM	rs140020287	0.00122722	41.7324
ADM_P35318_OID21467_v1_Oncology_expo_rt.txt	chr11	10063344	11:10084891:ATT:A:imp:v1	ATT	A	0.332569	0.972799	33966	ADD	0.153431	0.00757711	410.031	90.4425	NA	3.61e-91	ADM	rs7106528	0.0119279	410.009
ADM_P35318_OID21467_v1_Oncology_expo_rt.txt	chr11	10171746	11:10193293:A:G:imp:v1	A	G	0.0324148	0.974948	33966	ADD	0.141172	0.0201392	49.1374	11.6222	NA	2.39e-12	ADM	rs75948396	0.00144458	49.1346
ADM_P35318_OID21467_v1_Oncology_expo_rt.txt	chr11	10173272	11:10194819:C:T:imp:v1	C	T	0.0358845	0.883924	33966	ADD	0.166969	0.0201266	68.8225	15.9676	NA	1.08e-16	ADM	rs145492436	0.00202212	68.8185
ADM_P35318_OID21467_v1_Oncology_expo_rt.txt	chr11	10213045	11:10234592:C:T:imp:v1	C	T	0.0536138	0.89668	33966	ADD	0.171053	0.0165028	107.435	24.4468	NA	3.57e-25	ADM	rs117362045	0.00315305	107.429
ADM_P35318_OID21467_v1_Oncology_expo_rt.txt	chr11	10248195	11:10269742:G:T:imp:v1	G	T	0.0582267	0.949455	33966	ADD	-0.0945871	0.0154291	37.5822	9.05729	NA	8.76e-10	ADM	rs74847924	0.00110524	37.58
ADM_P35318_OID21467_v1_Oncology_expo_rt.txt	chr11	10312679	11:10334226:GT:G:imp:v1	GT	G	0.149347	0.734585	33966	ADD	0.101727	0.0115282	77.8659	17.9575	NA	1.1e-18	ADM	rs185600684	0.00228723	77.8617
ADM_P35318_OID21467_v1_Oncology_expo_rt.txt	chr11	10336912	11:10358459:C:T:imp:v1	C	T	0.472363	0.999662	33966	ADD	0.159271	0.00705197	510.095	112.219	NA	6.04e-113	ADM	rs7926490	0.0147957	510.067
ADM_P35318_OID21467_v1_Oncology_expo_rt.txt	chr11	10351412	11:10372959:C:T:imp:v1	C	T	0.474916	0.998716	33966	ADD	-0.0391628	0.00705192	30.8413	7.55283	NA	2.8e-08	ADM	rs11042750	0.000907181	30.8395
ADM_P35318_OID21467_v1_Oncology_expo_rt.txt	chr11	10362756	11:10384303:G:A:imp:v1	G	A	0.161636	0.9981	33966	ADD	-0.134952	0.00956972	198.867	44.4329	NA	3.69e-45	ADM	rs12793175	0.00582077	198.854
ADM_P35318_OID21467_v1_Oncology_expo_rt.txt	chr11	10403062	11:10424609:G:A:imp:v1	G	A	0.414567	0.983704	33966	ADD	0.0419119	0.00720863	33.8041	8.21503	NA	6.09e-09	ADM	rs11042782	0.000994244	33.8021
AFAP1_Q8N556_OID30569_v1_Inflammation_II_expo_rt.txt	chr4	7480161	4:7481888:A:G:imp:v1	A	G	0.409806	0.983128	33187	ADD	-0.0473791	0.00786673	36.2731	8.7657	NA	1.72e-09	AFAP1	rs56248498	0.0010918	36.271
AFAP1_Q8N556_OID30569_v1_Inflammation_II_expo_rt.txt	chr4	7523939	4:7525666:G:A:imp:v1	G	A	0.0331003	0.994011	33187	ADD	-0.136276	0.0214971	40.1861	9.63659	NA	2.31e-10	AFAP1	rs34082507	0.00120944	40.184
AFAP1_Q8N556_OID30569_v1_Inflammation_II_expo_rt.txt	chr4	7535019	4:7536746:C:T:imp:v1	C	T	0.402806	0.988831	33187	ADD	-0.0688754	0.00786484	76.6917	17.6993	NA	2e-18	AFAP1	rs7696497	0.00230557	76.6871
AFAP1_Q8N556_OID30569_v1_Inflammation_II_expo_rt.txt	chr4	7538551	4:7540278:C:A:imp:v1	C	A	0.0731913	1.01209	33187	ADD	-0.112702	0.0146299	59.3443	13.8782	NA	1.32e-14	AFAP1	rs77351266	0.00178499	59.3409
AFAP1_Q8N556_OID30569_v1_Inflammation_II_expo_rt.txt	chr4	7544871	4:7546598:G:A:imp:v1	G	A	0.753557	1.00311	33187	ADD	-0.084626	0.00888489	90.7202	20.7812	NA	1.66e-21	AFAP1	rs4689138	0.00272615	90.7146
AFAP1_Q8N556_OID30569_v1_Inflammation_II_expo_rt.txt	chr4	7589898	4:7591625:C:T:imp:v1	C	T	0.0434507	1.00532	33187	ADD	-0.108786	0.0187538	33.6486	8.1803	NA	6.6e-09	AFAP1	rs79148301	0.00101288	33.6466
AFAP1_Q8N556_OID30569_v1_Inflammation_II_expo_rt.txt	chr4	7592848	4:7594575:A:G:imp:v1	A	G	0.0467502	0.995583	33187	ADD	0.132035	0.0181993	52.6343	12.396	NA	4.02e-13	AFAP1	rs62277500	0.00158348	52.6311
AFAP1_Q8N556_OID30569_v1_Inflammation_II_expo_rt.txt	chr4	7594424	4:7596151:T:C:imp:v1	T	C	0.542509	1.00221	33187	ADD	-0.0434735	0.00768728	31.982	7.80796	NA	1.56e-08	AFAP1	rs4689144	0.000962759	31.9799
AFAP1_Q8N556_OID30569_v1_Inflammation_II_expo_rt.txt	chr4	7602895	4:7604622:G:A:imp:v1	G	A	0.045841	0.984224	33187	ADD	0.114353	0.0184794	38.2926	9.21544	NA	6.09e-10	AFAP1	rs6832677	0.00115253	38.2907
AFAP1_Q8N556_OID30569_v1_Inflammation_II_expo_rt.txt	chr4	7625983	4:7627710:T:A:imp:v1	T	A	0.0313333	0.934854	33187	ADD	0.151238	0.022753	44.1817	10.5239	NA	2.99e-11	AFAP1	rs77236060	0.00132953	44.1793
AFAP1_Q8N556_OID30569_v1_Inflammation_II_expo_rt.txt	chr4	7628289	4:7630016:G:A:imp:v1	G	A	0.169275	0.93749	33187	ADD	0.0844128	0.0105612	63.8834	14.8794	NA	1.32e-15	AFAP1	rs1808195	0.00192126	63.8799
AFAP1_Q8N556_OID30569_v1_Inflammation_II_expo_rt.txt	chr4	7637253	4:7638980:A:G:imp:v1	A	G	0.456284	0.986227	33187	ADD	-0.0637432	0.00774798	67.6847	15.7171	NA	1.92e-16	AFAP1	rs9991951	0.00203534	67.6807
AFAP1_Q8N556_OID30569_v1_Inflammation_II_expo_rt.txt	chr4	7651273	4:7653000:C:T:imp:v1	C	T	0.734747	0.980639	33187	ADD	-0.0650218	0.00876867	54.9858	12.9158	NA	1.21e-13	AFAP1	rs886370	0.00165411	54.9825
AFAP1_Q8N556_OID30569_v1_Inflammation_II_expo_rt.txt	chr4	7651718	4:7653445:C:T:imp:v1	C	T	0.022498	0.953037	33187	ADD	-0.144794	0.0264824	29.8943	7.34078	NA	4.56e-08	AFAP1	rs116362672	0.000899969	29.8924
AFAP1_Q8N556_OID30569_v1_Inflammation_II_expo_rt.txt	chr4	7660114	4:7661841:G:T:imp:v1	G	T	0.0224174	0.981535	33187	ADD	0.311413	0.0261381	141.946	32.0004	NA	9.99e-33	AFAP1	rs116794593	0.00425896	141.938
AFAP1_Q8N556_OID30569_v1_Inflammation_II_expo_rt.txt	chr4	7663774	4:7665501:T:G:imp:v1	T	G	0.0321963	1.00445	33187	ADD	0.135475	0.0216657	39.0998	9.39504	NA	4.03e-10	AFAP1	rs7679239	0.00117677	39.0973
AFAP1_Q8N556_OID30569_v1_Inflammation_II_expo_rt.txt	chr4	7664258	4:7665985:C:T:imp:v1	C	T	0.140971	0.983207	33187	ADD	-0.0770536	0.0111158	48.0516	11.3818	NA	4.15e-12	AFAP1	rs56160934	0.0014458	48.0483
AFAP1_Q8N556_OID30569_v1_Inflammation_II_expo_rt.txt	chr4	7668903	4:7670630:C:T:imp:v1	C	T	0.139737	0.994894	33187	ADD	0.078938	0.0110843	50.7177	11.972	NA	1.07e-12	AFAP1	rs35235499	0.00152589	50.7142
AFAP1_Q8N556_OID30569_v1_Inflammation_II_expo_rt.txt	chr4	7671819	4:7673546:C:T:imp:v1	C	T	0.11376	0.916871	33187	ADD	0.0994983	0.0126076	62.2822	14.5264	NA	2.98e-15	AFAP1	rs7668169	0.0018732	62.2788
AFAP1_Q8N556_OID30569_v1_Inflammation_II_expo_rt.txt	chr4	7675115	4:7676842:G:T:imp:v1	G	T	0.027602	0.90152	33187	ADD	-0.153709	0.0246459	38.8962	9.34974	NA	4.47e-10	AFAP1	rs80240748	0.00117066	38.894
AFAP1_Q8N556_OID30569_v1_Inflammation_II_expo_rt.txt	chr4	7680860	4:7682587:A:G:imp:v1	A	G	0.152997	0.988178	33187	ADD	-0.137072	0.0107112	163.766	36.769	NA	1.7e-37	AFAP1	rs73202600	0.00491038	163.755
AFAP1_Q8N556_OID30569_v1_Inflammation_II_expo_rt.txt	chr4	7684551	4:7686278:C:T:imp:v1	C	T	0.0244523	0.992619	33187	ADD	0.166914	0.0249122	44.891	10.6813	NA	2.08e-11	AFAP1	rs16840820	0.00135085	44.8885
AFAP1_Q8N556_OID30569_v1_Inflammation_II_expo_rt.txt	chr4	7684999	4:7686726:C:T:imp:v1	C	T	0.2392	0.968671	33187	ADD	-0.0985042	0.00913283	116.332	26.3957	NA	4.02e-27	AFAP1	rs2057724	0.0034931	116.325
AFAP1_Q8N556_OID30569_v1_Inflammation_II_expo_rt.txt	chr4	7695704	4:7697431:GTGGA:G:imp:v1	GTGGA	G	0.721509	0.809243	33187	ADD	0.0567376	0.00950605	35.6239	8.621	NA	2.39e-09	AFAP1	rs55775528	0.00107228	35.6218
AFAP1_Q8N556_OID30569_v1_Inflammation_II_expo_rt.txt	chr4	7699753	4:7701480:C:T:imp:v1	C	T	0.172341	0.95516	33187	ADD	0.165832	0.010386	254.941	56.6626	NA	2.17e-57	AFAP1	rs111648392	0.0076234	254.926
AFAP1_Q8N556_OID30569_v1_Inflammation_II_expo_rt.txt	chr4	7700486	4:7702213:G:A:imp:v1	G	A	0.0178129	0.932754	33187	ADD	0.180116	0.0300098	36.0231	8.70999	NA	1.95e-09	AFAP1	rs142089336	0.00108427	36.0207
AFAP1_Q8N556_OID30569_v1_Inflammation_II_expo_rt.txt	chr4	7701001	4:7702728:G:C:imp:v1	G	C	0.218027	0.927019	33187	ADD	0.0859118	0.00964319	79.3715	18.2885	NA	5.15e-19	AFAP1	rs9997607	0.00238594	79.3666
AFAP1_Q8N556_OID30569_v1_Inflammation_II_expo_rt.txt	chr4	7701035	4:7702762:A:G:imp:v1	A	G	0.0106839	0.880317	33187	ADD	0.291055	0.0397412	53.6375	12.6178	NA	2.41e-13	AFAP1	rs145166371	0.00161361	53.6342
AFAP1_Q8N556_OID30569_v1_Inflammation_II_expo_rt.txt	chr4	7702080	4:7703807:C:T:imp:v1	C	T	0.734903	0.925777	33187	ADD	-0.140384	0.00902545	241.933	53.8267	NA	1.49e-54	AFAP1	rs1989948	0.00723727	241.92
AFAP1_Q8N556_OID30569_v1_Inflammation_II_expo_rt.txt	chr4	7703068	4:7704795:C:T:imp:v1	C	T	0.288514	0.92079	33187	ADD	0.0740945	0.00881909	70.5869	16.3561	NA	4.4e-17	AFAP1	rs2359630	0.00212243	70.5827
AFAP1_Q8N556_OID30569_v1_Inflammation_II_expo_rt.txt	chr4	7703129	4:7704856:C:T:imp:v1	C	T	0.0194786	0.877783	33187	ADD	0.292573	0.0296074	97.6487	22.3014	NA	5e-23	AFAP1	rs143239378	0.00293376	97.6431
AFAP1_Q8N556_OID30569_v1_Inflammation_II_expo_rt.txt	chr4	7707740	4:7709467:G:C:imp:v1	G	C	0.0173845	0.94194	33187	ADD	-0.277291	0.0302218	84.184	19.346	NA	4.51e-20	AFAP1	rs146017558	0.00253024	84.1792
AFAP1_Q8N556_OID30569_v1_Inflammation_II_expo_rt.txt	chr4	7707976	4:7709703:G:A:imp:v1	G	A	0.878857	0.987288	33187	ADD	-0.0659961	0.0118242	31.1524	7.62242	NA	2.39e-08	AFAP1	rs757247	0.000937816	31.1506
AFAP1_Q8N556_OID30569_v1_Inflammation_II_expo_rt.txt	chr4	7712125	4:7713852:C:T:imp:v1	C	T	0.0370094	0.966129	33187	ADD	0.314607	0.0206722	231.614	51.5767	NA	2.65e-52	AFAP1	rs1076228	0.00693067	231.599
AFAP1_Q8N556_OID30569_v1_Inflammation_II_expo_rt.txt	chr4	7713131	4:7714858:G:A:imp:v1	G	A	0.126209	1.00584	33187	ADD	-0.123604	0.0115104	115.315	26.1729	NA	6.72e-27	AFAP1	rs60425287	0.00346266	115.308
AFAP1_Q8N556_OID30569_v1_Inflammation_II_expo_rt.txt	chr4	7713454	4:7715181:G:A:imp:v1	G	A	0.435645	0.974577	33187	ADD	-0.222822	0.00783385	809.029	177.231	NA	5.87e-178	AFAP1	rs11726260	0.0237978	808.983
AFAP1_Q8N556_OID30569_v1_Inflammation_II_expo_rt.txt	chr4	7716070	4:7717797:G:A:imp:v1	G	A	0.0438123	1.01172	33187	ADD	0.112535	0.0186204	36.5258	8.82201	NA	1.51e-09	AFAP1	rs73204721	0.00109939	36.5234
AFAP1_Q8N556_OID30569_v1_Inflammation_II_expo_rt.txt	chr4	7716807	4:7718534:T:G:imp:v1	T	G	0.866746	0.990076	33187	ADD	-0.354941	0.0113352	980.518	214.511	NA	3.08e-215	AFAP1	rs4689835	0.0286973	980.455
AFAP1_Q8N556_OID30569_v1_Inflammation_II_expo_rt.txt	chr4	7722646	4:7724373:C:A:imp:v1	C	A	0.282549	0.923571	33187	ADD	-0.251291	0.0088597	804.477	176.241	NA	5.74e-177	AFAP1	rs11722616	0.0236671	804.433
AFAP1_Q8N556_OID30569_v1_Inflammation_II_expo_rt.txt	chr4	7724124	4:7725851:G:A:imp:v1	G	A	0.476318	0.905536	33187	ADD	0.121847	0.00806637	228.176	50.8268	NA	1.49e-51	AFAP1	rs62290751	0.00682857	228.164
AFAP1_Q8N556_OID30569_v1_Inflammation_II_expo_rt.txt	chr4	7724351	4:7726078:G:T:imp:v1	G	T	0.0131252	0.815527	33187	ADD	-0.275661	0.0372925	54.6396	12.8393	NA	1.45e-13	AFAP1	rs118142304	0.00164371	54.6363
AFAP1_Q8N556_OID30569_v1_Inflammation_II_expo_rt.txt	chr4	7725572	4:7727299:A:G:imp:v1	A	G	0.50904	1.00284	33187	ADD	0.323838	0.00765794	1788.26	390.04	NA	0	AFAP1	rs34786658	0.0511294	1788.16
AFAP1_Q8N556_OID30569_v1_Inflammation_II_expo_rt.txt	chr4	7727451	4:7729178:G:A:imp:v1	G	A	0.0301711	0.946078	33187	ADD	-0.30165	0.0230364	171.466	38.451	NA	3.54e-39	AFAP1	rs115053992	0.0051401	171.455
AFAP1_Q8N556_OID30569_v1_Inflammation_II_expo_rt.txt	chr4	7733384	4:7735111:A:G:imp:v1	A	G	0.081008	0.92318	33187	ADD	0.711304	0.0146258	2365.21	515.384	NA	0	AFAP1	rs79532786	0.066528	2365.08
AFAP1_Q8N556_OID30569_v1_Inflammation_II_expo_rt.txt	chr4	7734401	4:7736128:C:T:imp:v1	C	T	0.0933068	0.94667	33187	ADD	-0.244072	0.0135513	324.396	71.7966	NA	1.6e-72	AFAP1	rs13105903	0.00968014	324.375
AFAP1_Q8N556_OID30569_v1_Inflammation_II_expo_rt.txt	chr4	7737891	4:7739618:T:C:imp:v1	T	C	0.180685	0.961439	33187	ADD	0.237167	0.0101655	544.31	119.662	NA	2.18e-120	AFAP1	rs9996177	0.0161368	544.283
AFAP1_Q8N556_OID30569_v1_Inflammation_II_expo_rt.txt	chr4	7742600	4:7744327:C:A:imp:v1	C	A	0.0298159	0.999476	33187	ADD	-0.289204	0.0225457	164.543	36.9389	NA	1.15e-37	AFAP1	rs2234765	0.00493361	164.534
AFAP1_Q8N556_OID30569_v1_Inflammation_II_expo_rt.txt	chr4	7747206	4:7748933:A:C:imp:v1	A	C	0.429355	0.996697	33187	ADD	0.357192	0.00775788	2119.91	462.094	NA	0	AFAP1	rs10005858	0.0600423	2119.78
AFAP1_Q8N556_OID30569_v1_Inflammation_II_expo_rt.txt	chr4	7748730	4:7750457:C:T:imp:v1	C	T	0.475986	0.951986	33187	ADD	0.246742	0.00786714	983.676	215.197	NA	6.35e-216	AFAP1	rs10805002	0.0287872	983.617
AFAP1_Q8N556_OID30569_v1_Inflammation_II_expo_rt.txt	chr4	7750759	4:7752486:C:T:imp:v1	C	T	0.60589	0.993536	33187	ADD	-0.336697	0.00786989	1830.38	399.192	NA	0	AFAP1	rs4689850	0.0522706	1830.27
AFAP1_Q8N556_OID30569_v1_Inflammation_II_expo_rt.txt	chr4	7752903	4:7754630:T:G:imp:v1	T	G	0.0247608	0.954551	33187	ADD	-0.279314	0.0252541	122.327	27.7083	NA	1.96e-28	AFAP1	rs146821812	0.00367245	122.319
AFAP1_Q8N556_OID30569_v1_Inflammation_II_expo_rt.txt	chr4	7755025	4:7756752:G:A:imp:v1	G	A	0.566857	0.976635	33187	ADD	-0.599204	0.00782803	5859.28	1274.31	NA	0	AFAP1	rs17382351	0.15006	5858.93
AFAP1_Q8N556_OID30569_v1_Inflammation_II_expo_rt.txt	chr4	7755693	4:7757420:A:C:imp:v1	A	C	0.0112393	1.00219	33187	ADD	0.764674	0.0363323	442.961	97.61	NA	2.45e-98	AFAP1	rs182319991	0.0131717	442.936
AFAP1_Q8N556_OID30569_v1_Inflammation_II_expo_rt.txt	chr4	7758931	4:7760658:A:G:imp:v1	A	G	0.01252	1.00194	33187	ADD	-0.300395	0.0344514	76.0277	17.5533	NA	2.8e-18	AFAP1	rs190109880	0.00228565	76.0231
AFAP1_Q8N556_OID30569_v1_Inflammation_II_expo_rt.txt	chr4	7762164	4:7763891:C:G:imp:v1	C	G	0.0263605	0.966864	33187	ADD	-0.371148	0.0243307	232.694	51.8123	NA	1.54e-52	AFAP1	rs73206587	0.00696278	232.68
AFAP1_Q8N556_OID30569_v1_Inflammation_II_expo_rt.txt	chr4	7763839	4:7765566:C:G:imp:v1	C	G	0.11149	0.994081	33187	ADD	-0.355598	0.0122153	847.442	185.582	NA	2.62e-186	AFAP1	rs730420	0.0248996	847.392
AFAP1_Q8N556_OID30569_v1_Inflammation_II_expo_rt.txt	chr4	7766502	4:7768229:G:A:imp:v1	G	A	0.0261569	0.940974	33187	ADD	0.829441	0.0247538	1122.76	245.428	NA	3.73e-246	AFAP1	rs34271107	0.0327242	1122.69
AFAP1_Q8N556_OID30569_v1_Inflammation_II_expo_rt.txt	chr4	7767589	4:7769316:C:T:imp:v1	C	T	0.0826113	0.934393	33187	ADD	-0.274457	0.0144077	362.879	80.1772	NA	6.65e-81	AFAP1	rs757242	0.010816	362.855
AFAP1_Q8N556_OID30569_v1_Inflammation_II_expo_rt.txt	chr4	7768411	4:7770138:G:A:imp:v1	G	A	0.0115748	0.941809	33187	ADD	0.660214	0.0369509	319.243	70.6741	NA	2.12e-71	AFAP1	rs141905227	0.00952782	319.222
AFAP1_Q8N556_OID30569_v1_Inflammation_II_expo_rt.txt	chr4	7768886	4:7770613:C:T:imp:v1	C	T	0.0147171	0.975297	33187	ADD	-0.319533	0.0322276	98.3045	22.4452	NA	3.59e-23	AFAP1	rs62636596	0.00295341	98.2991
AFAP1_Q8N556_OID30569_v1_Inflammation_II_expo_rt.txt	chr4	7770448	4:7772175:C:A:imp:v1	C	A	0.934566	0.984599	33187	ADD	0.333585	0.0156222	455.964	100.44	NA	3.63e-101	AFAP1	rs4234829	0.013553	455.935
AFAP1_Q8N556_OID30569_v1_Inflammation_II_expo_rt.txt	chr4	7773671	4:7775398:G:A:imp:v1	G	A	0.0437822	1.00891	33187	ADD	0.722332	0.0186528	1499.63	327.327	NA	0	AFAP1	rs55680331	0.0432338	1499.54
AFAP1_Q8N556_OID30569_v1_Inflammation_II_expo_rt.txt	chr4	7774180	4:7775907:C:T:imp:v1	C	T	0.0777058	0.992753	33187	ADD	-0.33115	0.0143702	531.037	116.775	NA	1.68e-117	AFAP1	rs4689164	0.0157493	531.004
AFAP1_Q8N556_OID30569_v1_Inflammation_II_expo_rt.txt	chr4	7786879	4:7788606:T:C:imp:v1	T	C	0.0302401	0.949445	33187	ADD	0.838804	0.022973	1333.16	291.154	NA	7.01e-292	AFAP1	rs62289272	0.03862	1333.09
AFAP1_Q8N556_OID30569_v1_Inflammation_II_expo_rt.txt	chr4	7806107	4:7807834:T:C:imp:v1	T	C	0.526437	0.996256	33187	ADD	0.491149	0.00769093	4078.21	887.475	NA	0	AFAP1	rs1106248	0.109437	4077.96
AFAP1_Q8N556_OID30569_v1_Inflammation_II_expo_rt.txt	chr4	7808300	4:7810027:A:C:imp:v1	A	C	0.162805	1.00583	33187	ADD	-0.362502	0.0103565	1225.17	267.685	NA	2.07e-268	AFAP1	rs6846245	0.0356027	1225.09
AFAP1_Q8N556_OID30569_v1_Inflammation_II_expo_rt.txt	chr4	7809270	4:7810997:G:A:imp:v1	G	A	0.0152867	0.943837	33187	ADD	-0.397292	0.0321645	152.569	34.3225	NA	4.76e-35	AFAP1	rs113462604	0.00457621	152.56
AFAP1_Q8N556_OID30569_v1_Inflammation_II_expo_rt.txt	chr4	7810402	4:7812129:C:T:imp:v1	C	T	0.0248099	0.93055	33187	ADD	-0.432809	0.0255489	286.978	63.6449	NA	2.27e-64	AFAP1	rs115661801	0.00857316	286.96
AFAP1_Q8N556_OID30569_v1_Inflammation_II_expo_rt.txt	chr4	7815934	4:7817661:T:C:imp:v1	T	C	0.0752554	1.00435	33187	ADD	-0.359307	0.0144983	614.181	134.861	NA	1.38e-135	AFAP1	rs79910822	0.0181704	614.145
AFAP1_Q8N556_OID30569_v1_Inflammation_II_expo_rt.txt	chr4	7817509	4:7819236:T:C:imp:v1	T	C	0.0415692	0.931656	33187	ADD	0.838626	0.0198985	1776.21	387.422	NA	0	AFAP1	rs111860188	0.0508024	1776.11
AFAP1_Q8N556_OID30569_v1_Inflammation_II_expo_rt.txt	chr4	7817563	4:7819290:C:T:imp:v1	C	T	0.0166212	0.951242	33187	ADD	0.511502	0.0307431	276.821	61.4317	NA	3.7e-62	AFAP1	rs138678160	0.00827225	276.805
AFAP1_Q8N556_OID30569_v1_Inflammation_II_expo_rt.txt	chr4	7825599	4:7827326:A:C:imp:v1	A	C	0.0370627	0.99866	33187	ADD	0.785668	0.0203092	1496.55	326.657	NA	0	AFAP1	rs114885688	0.0431488	1496.46
AFAP1_Q8N556_OID30569_v1_Inflammation_II_expo_rt.txt	chr4	7840106	4:7841833:A:C:imp:v1	A	C	0.404895	0.994758	33187	ADD	-0.170953	0.00783082	476.586	104.927	NA	1.18e-105	AFAP1	rs4689166	0.0141572	476.555
AFAP1_Q8N556_OID30569_v1_Inflammation_II_expo_rt.txt	chr4	7840154	4:7841881:C:T:imp:v1	C	T	0.0133778	0.962288	33187	ADD	-0.363048	0.0340118	113.939	25.8716	NA	1.34e-26	AFAP1	rs138169773	0.00342147	113.931
AFAP1_Q8N556_OID30569_v1_Inflammation_II_expo_rt.txt	chr4	7842553	4:7844280:A:G:imp:v1	A	G	0.100401	0.998153	33187	ADD	0.107331	0.0127699	70.6435	16.3686	NA	4.28e-17	AFAP1	rs56870995	0.00212414	70.6398
AFAP1_Q8N556_OID30569_v1_Inflammation_II_expo_rt.txt	chr4	7849904	4:7851631:A:C:imp:v1	A	C	0.0110289	0.956882	33187	ADD	-0.358136	0.0375244	91.0897	20.8623	NA	1.37e-21	AFAP1	rs74576548	0.00273722	91.084
AFAP1_Q8N556_OID30569_v1_Inflammation_II_expo_rt.txt	chr4	7863433	4:7865160:G:A:imp:v1	G	A	0.0146596	0.911647	33187	ADD	-0.306733	0.0334151	84.2628	19.3633	NA	4.33e-20	AFAP1	rs150068094	0.0025326	84.2576
AFAP1_Q8N556_OID30569_v1_Inflammation_II_expo_rt.txt	chr4	7864069	4:7865796:C:A:imp:v1	C	A	0.441768	0.782938	33187	ADD	-0.140556	0.00872636	259.436	57.6426	NA	2.28e-58	AFAP1	rs79923402	0.0077568	259.422
AFAP1_Q8N556_OID30569_v1_Inflammation_II_expo_rt.txt	chr4	7864170	4:7865897:G:A:imp:v1	G	A	0.0395875	0.975796	33187	ADD	-0.22018	0.0199015	122.401	27.7245	NA	1.89e-28	AFAP1	rs116300129	0.00367466	122.393
AFAP1_Q8N556_OID30569_v1_Inflammation_II_expo_rt.txt	chr4	7887381	4:7889108:T:C:imp:v1	T	C	0.0648612	0.994974	33187	ADD	-0.324464	0.0156048	432.333	95.2969	NA	5.05e-96	AFAP1	rs4696771	0.0128596	432.305
AFAP1_Q8N556_OID30569_v1_Inflammation_II_expo_rt.txt	chr4	7900276	4:7902003:A:C:imp:v1	A	C	0.259154	0.990213	33187	ADD	-0.124821	0.00879449	201.444	44.9954	NA	1.01e-45	AFAP1	rs4478172	0.00603334	201.432
AFAP1_Q8N556_OID30569_v1_Inflammation_II_expo_rt.txt	chr4	7934027	4:7935754:G:C:imp:v1	G	C	0.248605	0.983264	33187	ADD	0.464338	0.00894348	2695.59	587.154	NA	0	AFAP1	rs73214051	0.0751227	2695.44
AFAP1_Q8N556_OID30569_v1_Inflammation_II_expo_rt.txt	chr4	7938958	4:7940685:C:T:imp:v1	C	T	0.172731	0.989755	33187	ADD	-0.295873	0.0102031	840.907	184.162	NA	6.89e-185	AFAP1	rs112934262	0.0247122	840.853
AFAP1_Q8N556_OID30569_v1_Inflammation_II_expo_rt.txt	chr4	7948348	4:7950075:G:A:imp:v1	G	A	0.0182337	0.944108	33187	ADD	0.679806	0.0294881	531.467	116.868	NA	1.36e-117	AFAP1	rs144054591	0.0157619	531.435
AFAP1_Q8N556_OID30569_v1_Inflammation_II_expo_rt.txt	chr4	7952416	4:7954143:G:C:imp:v1	G	C	0.774409	1.00229	33187	ADD	0.258797	0.00916003	798.222	174.881	NA	1.32e-175	AFAP1	rs4320125	0.0234874	798.176
AFAP1_Q8N556_OID30569_v1_Inflammation_II_expo_rt.txt	chr4	7953227	4:7954954:G:A:imp:v1	G	A	0.0154362	0.943162	33187	ADD	-0.278347	0.0320278	75.53	17.4438	NA	3.6e-18	AFAP1	rs141954166	0.00227072	75.5253
AFAP1_Q8N556_OID30569_v1_Inflammation_II_expo_rt.txt	chr4	7955753	4:7957480:C:T:imp:v1	C	T	0.202538	0.976298	33187	ADD	-0.322394	0.00965244	1115.58	243.867	NA	1.36e-244	AFAP1	rs11937652	0.0325217	1115.51
AFAP1_Q8N556_OID30569_v1_Inflammation_II_expo_rt.txt	chr4	7960958	4:7962685:G:A:imp:v1	G	A	0.0204515	0.98145	33187	ADD	-0.333727	0.0273512	148.877	33.5156	NA	3.05e-34	AFAP1	rs145003598	0.00446599	148.869
AFAP1_Q8N556_OID30569_v1_Inflammation_II_expo_rt.txt	chr4	7963762	4:7965489:C:T:imp:v1	C	T	0.0391783	0.96404	33187	ADD	-0.224996	0.0201223	125.025	28.2988	NA	5.03e-29	AFAP1	rs112388834	0.00375313	125.017
AFAP1_Q8N556_OID30569_v1_Inflammation_II_expo_rt.txt	chr4	7965560	4:7967287:A:G:imp:v1	A	G	0.0345316	1.01394	33187	ADD	0.226516	0.020859	117.926	26.7449	NA	1.8e-27	AFAP1	rs73214071	0.00354081	117.919
AFAP1_Q8N556_OID30569_v1_Inflammation_II_expo_rt.txt	chr4	7976528	4:7978255:G:A:imp:v1	G	A	0.231467	0.980509	33187	ADD	-0.0745483	0.00917945	65.9542	15.3358	NA	4.62e-16	AFAP1	rs56357517	0.00198341	65.9502
AFAP1_Q8N556_OID30569_v1_Inflammation_II_expo_rt.txt	chr4	7980910	4:7982637:G:C:imp:v1	G	C	0.0124484	0.86901	33187	ADD	-0.362218	0.0370956	95.3445	21.7959	NA	1.6e-22	AFAP1	rs192662208	0.00286471	95.3387
AFAP1_Q8N556_OID30569_v1_Inflammation_II_expo_rt.txt	chr4	7997350	4:7999077:A:G:imp:v1	A	G	0.018351	0.950585	33187	ADD	-0.261833	0.0293009	79.8524	18.3942	NA	4.03e-19	AFAP1	rs12504635	0.00240035	79.8474
AFAP1_Q8N556_OID30569_v1_Inflammation_II_expo_rt.txt	chr4	8001224	4:8002951:T:C:imp:v1	T	C	0.232161	0.964352	33187	ADD	0.160904	0.00924219	303.098	67.1572	NA	6.96e-68	AFAP1	rs73214082	0.00905039	303.08
AFAP1_Q8N556_OID30569_v1_Inflammation_II_expo_rt.txt	chr4	8002200	4:8003927:G:A:imp:v1	G	A	0.332705	0.969291	33187	ADD	0.140375	0.00826764	288.283	63.9294	NA	1.18e-64	AFAP1	rs11729198	0.00861177	288.264
AFAP1_Q8N556_OID30569_v1_Inflammation_II_expo_rt.txt	chr4	8005921	4:8007648:A:G:imp:v1	A	G	0.0308253	0.994418	33187	ADD	0.225366	0.0222429	102.657	23.3997	NA	3.98e-24	AFAP1	rs17794885	0.00308379	102.652
AFAP1_Q8N556_OID30569_v1_Inflammation_II_expo_rt.txt	chr4	8006764	4:8008491:C:T:imp:v1	C	T	0.356054	0.969247	33187	ADD	-0.113605	0.00813225	195.152	43.6221	NA	2.39e-44	AFAP1	rs13111393	0.005846	195.14
AFAP1_Q8N556_OID30569_v1_Inflammation_II_expo_rt.txt	chr4	8008617	4:8010344:G:A:imp:v1	G	A	0.0112108	0.963929	33187	ADD	-0.269796	0.0370856	52.925	12.4603	NA	3.46e-13	AFAP1	rs41266511	0.00159221	52.9218
AFAP1_Q8N556_OID30569_v1_Inflammation_II_expo_rt.txt	chr4	8009502	4:8011229:T:C:imp:v1	T	C	0.0453127	0.957041	33187	ADD	-0.17949	0.0188391	90.773	20.7928	NA	1.61e-21	AFAP1	rs35704968	0.00272776	90.7683
AFAP1_Q8N556_OID30569_v1_Inflammation_II_expo_rt.txt	chr4	8009904	4:8011631:C:T:imp:v1	C	T	0.0664755	0.989295	33187	ADD	0.192136	0.0154765	154.125	34.6627	NA	2.17e-35	AFAP1	rs1317369	0.00462266	154.115
AFAP1_Q8N556_OID30569_v1_Inflammation_II_expo_rt.txt	chr4	8016738	4:8018465:C:T:imp:v1	C	T	0.0314274	0.93628	33187	ADD	-0.235319	0.0227121	107.349	24.428	NA	3.73e-25	AFAP1	rs114543481	0.00322425	107.343
AFAP1_Q8N556_OID30569_v1_Inflammation_II_expo_rt.txt	chr4	8016782	4:8018509:T:C:imp:v1	T	C	0.0134238	0.931707	33187	ADD	-0.289909	0.0345193	70.5342	16.3445	NA	4.52e-17	AFAP1	rs73214090	0.00212085	70.5299
AFAP1_Q8N556_OID30569_v1_Inflammation_II_expo_rt.txt	chr4	8017301	4:8019028:A:T:imp:v1	A	T	0.303594	0.916662	33187	ADD	-0.0938415	0.00870907	116.104	26.3458	NA	4.51e-27	AFAP1	rs2385897	0.00348628	116.097
AFAP1_Q8N556_OID30569_v1_Inflammation_II_expo_rt.txt	chr4	8024439	4:8026166:C:G:imp:v1	C	G	0.721296	0.994891	33187	ADD	-0.130027	0.00857521	229.921	51.2075	NA	6.2e-52	AFAP1	rs10049904	0.00688036	229.907
AFAP1_Q8N556_OID30569_v1_Inflammation_II_expo_rt.txt	chr4	8027103	4:8028830:C:G:imp:v1	C	G	0.0308908	0.970638	33187	ADD	0.25166	0.0224883	125.233	28.3442	NA	4.53e-29	AFAP1	rs150193895	0.00375934	125.224
AFAP1_Q8N556_OID30569_v1_Inflammation_II_expo_rt.txt	chr4	8028718	4:8030445:G:C:imp:v1	G	C	0.18655	0.990686	33187	ADD	-0.198271	0.00988889	401.999	88.6942	NA	2.02e-89	AFAP1	rs11933541	0.0119681	401.973
AFAP1_Q8N556_OID30569_v1_Inflammation_II_expo_rt.txt	chr4	8031913	4:8033640:C:T:imp:v1	C	T	0.0395603	0.973108	33187	ADD	0.236694	0.0199414	140.885	31.7682	NA	1.71e-32	AFAP1	rs62290639	0.00422723	140.876
AFAP1_Q8N556_OID30569_v1_Inflammation_II_expo_rt.txt	chr4	8043542	4:8045269:C:T:imp:v1	C	T	0.371818	0.983976	33187	ADD	-0.0803072	0.00799555	100.882	23.0103	NA	9.77e-24	AFAP1	rs36015355	0.00303058	100.876
AFAP1_Q8N556_OID30569_v1_Inflammation_II_expo_rt.txt	chr4	8047986	4:8049713:A:G:imp:v1	A	G	0.404108	0.98915	33187	ADD	-0.0469927	0.00785721	35.7704	8.65367	NA	2.22e-09	AFAP1	rs6849076	0.00107668	35.7683
AFAP1_Q8N556_OID30569_v1_Inflammation_II_expo_rt.txt	chr4	8049806	4:8051533:G:C:imp:v1	G	C	0.0264309	0.967244	33187	ADD	0.419835	0.024306	298.353	66.1235	NA	7.52e-67	AFAP1	rs13152121	0.00890995	298.335
AFAP1_Q8N556_OID30569_v1_Inflammation_II_expo_rt.txt	chr4	8052587	4:8054314:G:A:imp:v1	G	A	0.179836	0.965927	33187	ADD	-0.075915	0.0101584	55.8473	13.1061	NA	7.83e-14	AFAP1	rs12641424	0.00167999	55.8442
AFAP1_Q8N556_OID30569_v1_Inflammation_II_expo_rt.txt	chr4	8059931	4:8061658:C:A:imp:v1	C	A	0.808409	0.890945	33187	ADD	-0.181934	0.0103194	310.825	68.8405	NA	1.44e-69	AFAP1	rs10014127	0.00927902	310.808
AFAP1_Q8N556_OID30569_v1_Inflammation_II_expo_rt.txt	chr4	8076430	4:8078157:C:T:imp:v1	C	T	0.176369	0.975147	33187	ADD	-0.0576222	0.0101854	32.0055	7.81322	NA	1.54e-08	AFAP1	rs1573843	0.000963467	32.0035
AFAP1_Q8N556_OID30569_v1_Inflammation_II_expo_rt.txt	chr4	8081233	4:8082960:C:T:imp:v1	C	T	0.287003	0.958477	33187	ADD	0.114173	0.00865725	173.926	38.9884	NA	1.03e-39	AFAP1	rs3817329	0.00521349	173.916
AFAP1_Q8N556_OID30569_v1_Inflammation_II_expo_rt.txt	chr4	8089762	4:8091489:G:C:imp:v1	G	C	0.0285805	1.00856	33187	ADD	0.178218	0.0229121	60.5021	14.1337	NA	7.35e-15	AFAP1	rs116657754	0.00181976	60.4989
AFAP1_Q8N556_OID30569_v1_Inflammation_II_expo_rt.txt	chr4	8090126	4:8091853:C:A:imp:v1	C	A	0.0262411	0.801719	33187	ADD	0.1847	0.0267903	47.5308	11.2664	NA	5.42e-12	AFAP1	rs62289375	0.00143017	47.5283
AFAP1_Q8N556_OID30569_v1_Inflammation_II_expo_rt.txt	chr4	8102309	4:8104036:G:C:imp:v1	G	C	0.0647634	0.894205	33187	ADD	0.166213	0.0164744	101.791	23.2098	NA	6.17e-24	AFAP1	rs71603912	0.00305783	101.785
AFAP1_Q8N556_OID30569_v1_Inflammation_II_expo_rt.txt	chr4	8106744	4:8108471:G:A:imp:v1	G	A	0.137013	0.939617	33187	ADD	0.176272	0.011509	234.58	52.2233	NA	5.98e-53	AFAP1	rs13140321	0.00701883	234.566
AFAP1_Q8N556_OID30569_v1_Inflammation_II_expo_rt.txt	chr4	8107443	4:8109170:G:C:imp:v1	G	C	0.0581146	0.943948	33187	ADD	-0.117165	0.0168692	48.2398	11.4235	NA	3.77e-12	AFAP1	rs74505239	0.00145147	48.237
AFAP1_Q8N556_OID30569_v1_Inflammation_II_expo_rt.txt	chr4	8108891	4:8110618:T:C:imp:v1	T	C	0.133456	0.989434	33187	ADD	-0.124778	0.0113438	120.993	27.4163	NA	3.83e-28	AFAP1	rs62289386	0.00363254	120.985
AFAP1_Q8N556_OID30569_v1_Inflammation_II_expo_rt.txt	chr4	8110760	4:8112487:G:T:imp:v1	G	T	0.0404267	0.881567	33187	ADD	-0.170147	0.0207307	67.3628	15.6461	NA	2.26e-16	AFAP1	rs149671577	0.00202569	67.3588
AFAP1_Q8N556_OID30569_v1_Inflammation_II_expo_rt.txt	chr4	8120802	4:8122529:A:C:imp:v1	A	C	0.624129	0.990063	33187	ADD	-0.0434411	0.00795821	29.797	7.31899	NA	4.8e-08	AFAP1	rs10938693	0.000897043	29.7951
AFAP1_Q8N556_OID30569_v1_Inflammation_II_expo_rt.txt	chr4	8126019	4:8127746:G:A:imp:v1	G	A	0.0338084	0.996372	33187	ADD	-0.117843	0.0212552	30.7381	7.52972	NA	2.95e-08	AFAP1	rs74851400	0.000925352	30.7363
AFAP1_Q8N556_OID30569_v1_Inflammation_II_expo_rt.txt	chr4	8131228	4:8132955:A:G:imp:v1	A	G	0.251773	0.797048	33187	ADD	0.0575125	0.00989696	33.7692	8.20724	NA	6.21e-09	AFAP1	rs6852129	0.00101651	33.7672
AFAP1_Q8N556_OID30569_v1_Inflammation_II_expo_rt.txt	chr4	8137046	4:8138773:G:A:imp:v1	G	A	0.0685488	0.734111	33187	ADD	-0.108026	0.0177039	37.2324	8.9794	NA	1.05e-09	AFAP1	rs75880920	0.00112063	37.23
AFM_P43652_OID30741_v1_Inflammation_II_expo_rt.txt	chr4	73427413	4:74293130:T:C:imp:v1	T	C	0.0234188	0.991718	33995	ADD	0.2201	0.0247411	79.1411	18.2378	NA	5.78e-19	AFM	rs148208728	0.00232262	79.1364
AFM_P43652_OID30741_v1_Inflammation_II_expo_rt.txt	chr4	73480179	4:74345896:T:C:imp:v1	T	C	0.979125	0.989511	33995	ADD	0.336036	0.0262031	164.462	36.9213	NA	1.2e-37	AFM	rs13132712	0.00481454	164.453
AFM_P43652_OID30741_v1_Inflammation_II_expo_rt.txt	chr4	73547872	4:74413589:C:T:imp:v1	C	T	0.740216	1.00153	33995	ADD	0.0829801	0.00849602	95.3932	21.8066	NA	1.56e-22	AFM	rs3756073	0.00279824	95.3875
AFM_P43652_OID30741_v1_Inflammation_II_expo_rt.txt	chr4	73550229	4:74415946:A:G:imp:v1	A	G	0.0400545	0.950958	33995	ADD	0.112773	0.0194858	33.4942	8.14584	NA	7.15e-09	AFM	rs77000511	0.000984308	33.4926
AFM_P43652_OID30741_v1_Inflammation_II_expo_rt.txt	chr4	73807350	4:74673067:A:G:imp:v1	A	G	0.43336	0.99715	33995	ADD	0.0477102	0.00753536	40.088	9.61481	NA	2.43e-10	AFM	rs1951238	0.00117784	40.0856
AFM_P43652_OID30741_v1_Inflammation_II_expo_rt.txt	chr4	73810419	4:74676136:T:A:imp:v1	T	A	0.0151184	0.962196	33995	ADD	-0.185637	0.0311364	35.5462	8.60368	NA	2.49e-09	AFM	rs77633219	0.00104454	35.544
AFP_P02771_OID20978_v1_Neurology_expo_rt.txt	chr4	72638661	4:73504378:T:C:imp:v1	T	C	0.502888	0.961309	33307	ADD	-0.0519219	0.00713247	52.9934	12.4754	NA	3.35e-13	AFP	rs78729805	0.00158853	52.9902
AFP_P02771_OID20978_v1_Neurology_expo_rt.txt	chr4	72724647	4:73590364:A:G:imp:v1	A	G	0.435973	0.984915	33307	ADD	-0.0448683	0.00710164	39.9174	9.57686	NA	2.65e-10	AFP	rs9994933	0.00119703	39.915
AFP_P02771_OID20978_v1_Neurology_expo_rt.txt	chr4	72810971	4:73676688:T:C:imp:v1	T	C	0.107127	0.923875	33307	ADD	0.0820772	0.0117618	48.6964	11.5246	NA	2.99e-12	AFP	rs79880193	0.00145991	48.6935
AFP_P02771_OID20978_v1_Neurology_expo_rt.txt	chr4	72875644	4:73741361:G:GA:imp:v1	G	GA	0.559219	0.993697	33307	ADD	0.0442928	0.00706791	39.2721	9.43335	NA	3.69e-10	AFP	rs201576460	0.00117771	39.2698
AFP_P02771_OID20978_v1_Neurology_expo_rt.txt	chr4	72925583	4:73791300:G:A:imp:v1	G	A	0.0432348	0.959544	33307	ADD	-0.130181	0.0175473	55.0392	12.9276	NA	1.18e-13	AFP	rs111481194	0.00164977	55.0362
AFP_P02771_OID20978_v1_Neurology_expo_rt.txt	chr4	72935369	4:73801086:T:A:imp:v1	T	A	0.248607	0.985221	33307	ADD	0.0480452	0.00815242	34.7318	8.42206	NA	3.78e-09	AFP	rs9997454	0.00104169	34.7297
AFP_P02771_OID20978_v1_Neurology_expo_rt.txt	chr4	72967873	4:73833590:A:C:imp:v1	A	C	0.0502447	0.962197	33307	ADD	-0.141494	0.0163207	75.1621	17.3629	NA	4.34e-18	AFP	rs72661074	0.00225156	75.1575
AFP_P02771_OID20978_v1_Neurology_expo_rt.txt	chr4	72995203	4:73860920:A:G:imp:v1	A	G	0.875522	0.992262	33307	ADD	0.0805732	0.0106314	57.4381	13.4574	NA	3.49e-14	AFP	rs2366716	0.00172154	57.4347
AFP_P02771_OID20978_v1_Neurology_expo_rt.txt	chr4	72995555	4:73861272:C:T:imp:v1	C	T	0.0972597	0.974651	33307	ADD	0.114492	0.0119513	91.7738	21.0125	NA	9.72e-22	AFP	rs113112297	0.00274783	91.7686
AFP_P02771_OID20978_v1_Neurology_expo_rt.txt	chr4	73101664	4:73967381:C:CAA:imp:v1	C	CAA	0.200916	0.865885	33307	ADD	0.0777738	0.00937759	68.7836	15.9591	NA	1.1e-16	AFP	rs199965749	0.00206088	68.7794
AFP_P02771_OID20978_v1_Neurology_expo_rt.txt	chr4	73147108	4:74012825:T:C:imp:v1	T	C	0.0629789	0.929493	33307	ADD	0.0905105	0.0149246	36.7783	8.87825	NA	1.32e-09	AFP	rs79460463	0.00110301	36.7762
AFP_P02771_OID20978_v1_Neurology_expo_rt.txt	chr4	73327803	4:74193520:A:G:imp:v1	A	G	0.959363	0.959263	33307	ADD	-0.123416	0.018076	46.6167	11.0639	NA	8.63e-12	AFP	rs6446921	0.00139764	46.6136
AFP_P02771_OID20978_v1_Neurology_expo_rt.txt	chr4	73328080	4:74193797:T:C:imp:v1	T	C	0.017347	0.991072	33307	ADD	-0.520782	0.0268955	374.931	82.8015	NA	1.58e-83	AFP	rs78100839	0.0111316	374.91
AFP_P02771_OID20978_v1_Neurology_expo_rt.txt	chr4	73334188	4:74199905:C:T:imp:v1	C	T	0.033738	0.949706	33307	ADD	0.118262	0.0198662	35.4375	8.57944	NA	2.63e-09	AFP	rs113093138	0.00106283	35.4352
AFP_P02771_OID20978_v1_Neurology_expo_rt.txt	chr4	73453566	4:74319283:T:G:imp:v1	T	G	0.396859	1.00482	33307	ADD	-0.186045	0.00713109	680.648	149.316	NA	4.83e-150	AFP	rs12506899	0.0200264	680.61
AFP_P02771_OID20978_v1_Neurology_expo_rt.txt	chr4	73494060	4:74359777:G:GGT:imp:v1	G	GGT	0.761064	0.760672	33307	ADD	-0.0990659	0.00940173	111.028	25.2341	NA	5.83e-26	AFP	rs77302008	0.0033224	111.021
AFP_P02771_OID20978_v1_Neurology_expo_rt.txt	chr4	73551912	4:74417629:C:A:imp:v1	C	A	0.0249431	0.994267	33307	ADD	-0.147338	0.0224764	42.971	10.2553	NA	5.56e-11	AFP	rs149941802	0.00128849	42.9685
AFP_P02771_OID20978_v1_Neurology_expo_rt.txt	chr4	73588783	4:74454500:G:GTCATCATCA:imp:v1	G	GTCATCATCA	0.295103	0.772003	33307	ADD	0.0723043	0.00872137	68.732	15.9477	NA	1.13e-16	AFP	rs199829303	0.00205934	68.7278
AFP_P02771_OID20978_v1_Neurology_expo_rt.txt	chr4	73652922	4:74518639:C:T:imp:v1	C	T	0.474254	0.994349	33307	ADD	0.0781795	0.00702176	123.964	28.0665	NA	8.58e-29	AFP	rs10019041	0.00370804	123.956
AFP_P02771_OID20978_v1_Neurology_expo_rt.txt	chr4	73689334	4:74555051:C:T:imp:v1	C	T	0.0670129	0.995403	33307	ADD	-0.171566	0.014012	149.921	33.7438	NA	1.8e-34	AFP	rs72649172	0.00448101	149.912
AFP_P02771_OID20978_v1_Neurology_expo_rt.txt	chr4	73699679	4:74565396:G:T:imp:v1	G	T	0.0493884	0.946404	33307	ADD	0.103085	0.0165834	38.6402	9.29279	NA	5.1e-10	AFP	rs115780817	0.00115879	38.6383
AFP_P02771_OID20978_v1_Neurology_expo_rt.txt	chr4	73874452	4:74740169:C:G:imp:v1	C	G	0.217882	0.989473	33307	ADD	-0.0527221	0.00851444	38.3419	9.2264	NA	5.94e-10	AFP	rs10007826	0.00114984	38.3396
AFP_P02771_OID20978_v1_Neurology_expo_rt.txt	chr4	73940653	4:74806370:A:G:imp:v1	A	G	0.0110058	0.882558	33307	ADD	-0.252309	0.035659	50.0645	11.8275	NA	1.49e-12	AFP	rs149343071	0.00150086	50.0612
AGR2_O95994_OID20896_v1_Neurology_expo_rt.txt	chr7	16790333	7:16829957:T:C:imp:v1	T	C	0.569693	0.863715	32733	ADD	0.0560051	0.00827019	45.8589	10.8959	NA	1.27e-11	AGR2	rs200309162	0.00139904	45.8562
AGR2_O95994_OID20896_v1_Neurology_expo_rt.txt	chr7	16816925	7:16856549:C:T:imp:v1	C	T	0.566428	0.988657	32733	ADD	0.107279	0.00773052	192.582	43.0613	NA	8.68e-44	AGR2	rs7807123	0.00584896	192.569
AGR2_O95994_OID20896_v1_Neurology_expo_rt.txt	chr7	16847772	7:16887396:G:A:imp:v1	G	A	0.167862	0.948072	32733	ADD	-0.0863335	0.0104563	68.1716	15.8243	NA	1.5e-16	AGR2	rs11762974	0.00207832	68.1673
AGRN_O00468_OID20786_v1_Inflammation_expo_rt.txt	chr1	808040	1:743420:G:A:imp:v1	G	A	0.03908	0.726444	33848	ADD	-0.150404	0.0222242	45.8002	10.8829	NA	1.31e-11	AGRN	rs201920982	0.00135128	45.7974
AGRN_O00468_OID20786_v1_Inflammation_expo_rt.txt	chr1	918870	1:854250:A:G:imp:v1	A	G	0.2089	1.00411	33848	ADD	-0.103623	0.00901233	132.202	29.8692	NA	1.35e-30	AGRN	rs7537756	0.00389056	132.194
AGRN_O00468_OID20786_v1_Inflammation_expo_rt.txt	chr1	928131	1:863511:T:C:imp:v1	T	C	0.190545	0.771038	33848	ADD	0.128641	0.010646	146.009	32.8887	NA	1.29e-33	AGRN	rs28626846	0.0042952	146.002
AGRN_O00468_OID20786_v1_Inflammation_expo_rt.txt	chr1	950385	1:885765:G:A:imp:v1	G	A	0.0158081	0.791043	33848	ADD	0.224955	0.0331065	46.1706	10.965	NA	1.08e-11	AGRN	rs114631528	0.0013622	46.1678
AGRN_O00468_OID20786_v1_Inflammation_expo_rt.txt	chr1	951437	1:886817:C:T:imp:v1	C	T	0.909436	0.972783	33848	ADD	0.156626	0.012964	145.966	32.8792	NA	1.32e-33	AGRN	rs10465241	0.00429386	145.957
AGRN_O00468_OID20786_v1_Inflammation_expo_rt.txt	chr1	967369	1:902749:C:G:imp:v1	C	G	0.0505695	0.930496	33848	ADD	-0.183518	0.0173704	111.619	25.3636	NA	4.33e-26	AGRN	rs113967711	0.00328681	111.612
AGRN_O00468_OID20786_v1_Inflammation_expo_rt.txt	chr1	967865	1:903245:A:G:imp:v1	A	G	0.567584	0.933775	33848	ADD	0.12733	0.00766574	275.899	61.2308	NA	5.88e-62	AGRN	rs28690976	0.00808527	275.885
AGRN_O00468_OID20786_v1_Inflammation_expo_rt.txt	chr1	974175	1:909555:A:G:imp:v1	A	G	0.984241	0.860581	33848	ADD	-0.175581	0.0317775	30.5293	7.48298	NA	3.29e-08	AGRN	rs2340594	0.000901137	30.5274
AGRN_O00468_OID20786_v1_Inflammation_expo_rt.txt	chr1	975029	1:910409:T:C:imp:v1	T	C	0.115493	0.931605	33848	ADD	-0.177154	0.0118979	221.697	49.4139	NA	3.86e-50	AGRN	rs28536514	0.00650718	221.685
AGRN_O00468_OID20786_v1_Inflammation_expo_rt.txt	chr1	1001333	1:936713:G:T:imp:v1	G	T	0.114309	0.822318	33848	ADD	0.229845	0.0127242	326.295	72.2102	NA	6.16e-73	AGRN	rs61766282	0.00954794	326.275
AGRN_O00468_OID20786_v1_Inflammation_expo_rt.txt	chr1	1004570	1:939950:C:T:imp:v1	C	T	0.0192466	0.940213	33848	ADD	-0.309095	0.0275493	125.882	28.4864	NA	3.26e-29	AGRN	rs2799057	0.00370525	125.874
AGRN_O00468_OID20786_v1_Inflammation_expo_rt.txt	chr1	1016184	1:951564:A:G:imp:v1	A	G	0.394076	0.989672	33848	ADD	-0.292268	0.00754993	1498.57	327.097	NA	0	AGRN	rs2465141	0.0423964	1498.48
AGRN_O00468_OID20786_v1_Inflammation_expo_rt.txt	chr1	1019790	1:955170:G:A:imp:v1	G	A	0.0454759	0.808524	33848	ADD	-0.370295	0.0195904	357.281	78.9582	NA	1.1e-79	AGRN	rs189343112	0.0104452	357.259
AGRN_O00468_OID20786_v1_Inflammation_expo_rt.txt	chr1	1020947	1:956327:C:T:imp:v1	C	T	0.0618149	0.928498	33848	ADD	-0.194602	0.0158133	151.444	34.0767	NA	8.38e-35	AGRN	rs111893801	0.00445428	151.434
AGRN_O00468_OID20786_v1_Inflammation_expo_rt.txt	chr1	1022824	1:958204:C:A:imp:v1	C	A	0.0162527	0.960964	33848	ADD	-0.369651	0.0296104	155.846	35.0386	NA	9.15e-36	AGRN	rs147326918	0.00458318	155.837
AGRN_O00468_OID20786_v1_Inflammation_expo_rt.txt	chr1	1024129	1:959509:T:G:imp:v1	T	G	0.102133	0.993533	33848	ADD	0.109958	0.0121662	81.6849	18.7969	NA	1.6e-19	AGRN	rs28591569	0.00240749	81.6804
AGRN_O00468_OID20786_v1_Inflammation_expo_rt.txt	chr1	1028281	1:963661:C:T:imp:v1	C	T	0.0455438	0.919023	33848	ADD	0.155966	0.0183678	72.1015	16.6895	NA	2.04e-17	AGRN	rs13303147	0.00212563	72.0975
AGRN_O00468_OID20786_v1_Inflammation_expo_rt.txt	chr1	1046551	1:981931:A:G:imp:v1	A	G	0.913619	0.981424	33848	ADD	-0.13052	0.0131915	97.8955	22.3555	NA	4.41e-23	AGRN	rs2465128	0.00288389	97.8904
AGRN_O00468_OID20786_v1_Inflammation_expo_rt.txt	chr1	1047464	1:982844:G:C:imp:v1	G	C	0.0673169	0.857274	33848	ADD	0.145313	0.0158273	84.294	19.3702	NA	4.26e-20	AGRN	rs76264143	0.00248417	84.2887
AGRN_O00468_OID20786_v1_Inflammation_expo_rt.txt	chr1	1052930	1:988310:A:G:imp:v1	A	G	0.0571428	0.944514	33848	ADD	-0.142345	0.0162718	76.527	17.6631	NA	2.17e-18	AGRN	rs13303307	0.00225579	76.5222
AGRN_O00468_OID20786_v1_Inflammation_expo_rt.txt	chr1	1054120	1:989500:G:A:imp:v1	G	A	0.065529	0.896609	33848	ADD	0.130542	0.0156712	69.3897	16.0925	NA	8.08e-17	AGRN	rs72900467	0.00204585	69.3858
AGRN_O00468_OID20786_v1_Inflammation_expo_rt.txt	chr1	1057986	1:993366:G:T:imp:v1	G	T	0.0176779	0.721567	33848	ADD	0.229038	0.0327904	48.7892	11.5451	NA	2.85e-12	AGRN	rs140894808	0.00143934	48.7861
AGRN_O00468_OID20786_v1_Inflammation_expo_rt.txt	chr1	1068824	1:1004204:G:A:imp:v1	G	A	0.392747	0.72065	33848	ADD	0.120347	0.00885213	184.831	41.3694	NA	4.27e-42	AGRN	rs61766322	0.00543096	184.82
AGRN_O00468_OID20786_v1_Inflammation_expo_rt.txt	chr1	1070689	1:1006069:G:A:imp:v1	G	A	0.108564	0.84925	33848	ADD	0.166552	0.0128066	169.135	37.942	NA	1.14e-38	AGRN	rs55918415	0.00497204	169.124
AGRN_O00468_OID20786_v1_Inflammation_expo_rt.txt	chr1	1075715	1:1011095:A:G:imp:v1	A	G	0.886921	0.961812	33848	ADD	0.376866	0.0118168	1017.12	222.468	NA	3.4e-223	AGRN	rs11810785	0.0291731	1017.06
AGRN_O00468_OID20786_v1_Inflammation_expo_rt.txt	chr1	1085966	1:1021346:A:G:imp:v1	A	G	0.143656	0.970631	33848	ADD	-0.123041	0.0106235	134.141	30.2934	NA	5.09e-31	AGRN	rs10907177	0.00394742	134.134
AGRN_O00468_OID20786_v1_Inflammation_expo_rt.txt	chr1	1087043	1:1022423:G:A:imp:v1	G	A	0.0332368	0.98309	33848	ADD	0.131408	0.0206509	40.4918	9.70456	NA	1.97e-10	AGRN	rs114326054	0.00119485	40.4893
AGRN_O00468_OID20786_v1_Inflammation_expo_rt.txt	chr1	1087734	1:1023114:G:A:imp:v1	G	A	0.0212273	0.996798	33848	ADD	0.165563	0.0255115	42.1167	10.0656	NA	8.6e-11	AGRN	rs61766340	0.00124274	42.1142
AGRN_O00468_OID20786_v1_Inflammation_expo_rt.txt	chr1	1099549	1:1034929:T:C:imp:v1	T	C	0.0649086	0.797961	33848	ADD	-0.101867	0.0166803	37.2959	8.99354	NA	1.01e-09	AGRN	rs202164840	0.00110065	37.2935
AGRN_O00468_OID20786_v1_Inflammation_expo_rt.txt	chr1	1100425	1:1035805:G:A:imp:v1	G	A	0.336991	0.818547	33848	ADD	-0.0488005	0.0085826	32.3303	7.88582	NA	1.3e-08	AGRN	rs12759295	0.000954252	32.3285
AGRN_O00468_OID20786_v1_Inflammation_expo_rt.txt	chr1	1110226	1:1045606:A:C:imp:v1	A	C	0.0117141	0.990699	33848	ADD	-0.21273	0.0342683	38.5363	9.26966	NA	5.37e-10	AGRN	rs12080505	0.00113722	38.5342
AGRN_O00468_OID20786_v1_Inflammation_expo_rt.txt	chr1	1123524	1:1058904:C:T:imp:v1	C	T	0.0232622	0.918973	33848	ADD	-0.432071	0.0253923	289.538	64.2028	NA	6.27e-65	AGRN	rs35322744	0.00848153	289.521
AGRN_O00468_OID20786_v1_Inflammation_expo_rt.txt	chr1	1125436	1:1060816:G:A:imp:v1	G	A	0.0756632	0.922703	33848	ADD	0.0894656	0.0144503	38.3316	9.22412	NA	5.97e-10	AGRN	rs75112400	0.00113119	38.3295
AGRN_O00468_OID20786_v1_Inflammation_expo_rt.txt	chr1	1134062	1:1069442:C:T:imp:v1	C	T	0.314237	0.963779	33848	ADD	-0.134024	0.0080557	276.794	61.4257	NA	3.75e-62	AGRN	rs61766347	0.00811126	276.779
AGRN_O00468_OID20786_v1_Inflammation_expo_rt.txt	chr1	1186177	1:1121557:C:T:imp:v1	C	T	0.0384704	0.909829	33848	ADD	-0.189573	0.0200037	89.8122	20.5819	NA	2.62e-21	AGRN	rs112904239	0.00264636	89.8063
AGRP_O00253_OID20658_v1_Inflammation_expo_rt.txt	chr16	66825659	16:66859562:C:T:imp:v1	C	T	0.0229095	0.965903	34049	ADD	-0.147956	0.024699	35.8842	8.67902	NA	2.09e-09	AGRP	rs16957040	0.0010528	35.8824
AGRP_O00253_OID20658_v1_Inflammation_expo_rt.txt	chr16	67335723	16:67369626:C:A:imp:v1	C	A	0.229469	0.992888	34049	ADD	-0.048589	0.00867181	31.3947	7.67663	NA	2.11e-08	AGRP	rs113914633	0.000921195	31.3929
AGRP_O00253_OID20658_v1_Inflammation_expo_rt.txt	chr16	67418776	16:67452679:C:T:imp:v1	C	T	0.093293	0.972911	34049	ADD	0.0823002	0.0126587	42.2693	10.0995	NA	7.95e-11	AGRP	rs28765128	0.00123988	42.2667
AGRP_O00253_OID20658_v1_Inflammation_expo_rt.txt	chr16	67441899	16:67475802:G:A:imp:v1	G	A	0.0153025	0.964656	34049	ADD	-0.259008	0.0301088	74.0015	17.1076	NA	7.81e-18	AGRP	rs77115810	0.00216866	73.997
AGRP_O00253_OID20658_v1_Inflammation_expo_rt.txt	chr16	68471725	16:68505628:G:A:imp:v1	G	A	0.0185235	0.88036	34049	ADD	-0.169105	0.0286996	34.7187	8.41912	NA	3.81e-09	AGRP	rs148675321	0.00101862	34.7165
AGT_P01019_OID30709_v1_Inflammation_II_expo_rt.txt	chr1	230161913	1:230297659:C:T:imp:v1	C	T	0.612662	0.996445	33985	ADD	-0.0687373	0.00770621	79.5614	18.3302	NA	4.68e-19	AGT	rs2281719	0.00233561	79.5569
AGT_P01019_OID30709_v1_Inflammation_II_expo_rt.txt	chr1	230317567	1:230453313:C:A:imp:v1	C	A	0.222797	1.00098	33985	ADD	0.0555931	0.00900332	38.1274	9.17867	NA	6.63e-10	AGT	rs60920190	0.00112063	38.1251
AGT_P01019_OID30709_v1_Inflammation_II_expo_rt.txt	chr1	230444822	1:230580568:A:G:imp:v1	A	G	0.345839	0.992387	33985	ADD	0.0550701	0.00791102	48.4582	11.4718	NA	3.37e-12	AGT	rs34268709	0.00142384	48.4553
AGT_P01019_OID30709_v1_Inflammation_II_expo_rt.txt	chr1	230512934	1:230648680:T:C:imp:v1	T	C	0.0371296	0.947271	33985	ADD	0.11238	0.0203831	30.3978	7.45355	NA	3.52e-08	AGT	rs74448796	0.000893639	30.3957
AGT_P01019_OID30709_v1_Inflammation_II_expo_rt.txt	chr1	230549127	1:230684873:T:A:imp:v1	T	A	0.505043	0.941874	33985	ADD	-0.0647405	0.00772623	70.213	16.2738	NA	5.32e-17	AGT	rs3904042	0.00206174	70.2088
AGT_P01019_OID30709_v1_Inflammation_II_expo_rt.txt	chr1	230549353	1:230685099:G:C:imp:v1	G	C	0.0352635	0.879129	33985	ADD	0.171591	0.0216773	62.6585	14.6093	NA	2.46e-15	AGT	rs79241508	0.00184031	62.6546
AGT_P01019_OID30709_v1_Inflammation_II_expo_rt.txt	chr1	230561176	1:230696922:C:T:imp:v1	C	T	0.927291	1.00582	33985	ADD	0.132407	0.0143943	84.6142	19.4405	NA	3.63e-20	AGT	rs1327698	0.00248355	84.6087
AGT_P01019_OID30709_v1_Inflammation_II_expo_rt.txt	chr1	230577777	1:230713523:C:T:imp:v1	C	T	0.0254005	0.727222	33985	ADD	-0.155912	0.0279324	31.1559	7.62322	NA	2.38e-08	AGT	rs72749945	0.00091592	31.1542
AGT_P01019_OID30709_v1_Inflammation_II_expo_rt.txt	chr1	230579579	1:230715325:C:CT:imp:v1	C	CT	0.667862	0.842282	33985	ADD	0.0673056	0.00866979	60.2677	14.082	NA	8.28e-15	AGT	rs201621836	0.00177023	60.2642
AGT_P01019_OID30709_v1_Inflammation_II_expo_rt.txt	chr1	230581065	1:230716811:A:G:imp:v1	A	G	0.780636	0.962034	33985	ADD	-0.052794	0.00923503	32.6808	7.96416	NA	1.09e-08	AGT	rs913155	0.0009607	32.6789
AGT_P01019_OID30709_v1_Inflammation_II_expo_rt.txt	chr1	230609532	1:230745278:A:C:imp:v1	A	C	0.0434583	0.989384	33985	ADD	-0.118747	0.0184817	41.2822	9.88021	NA	1.32e-10	AGT	rs1359865	0.00121324	41.2796
AGT_P01019_OID30709_v1_Inflammation_II_expo_rt.txt	chr1	230619980	1:230755726:A:G:imp:v1	A	G	0.2488	0.991327	33985	ADD	0.111096	0.00870537	162.864	36.5721	NA	2.68e-37	AGT	rs12122535	0.00476935	162.853
AGT_P01019_OID30709_v1_Inflammation_II_expo_rt.txt	chr1	230645984	1:230781730:C:T:imp:v1	C	T	0.0381433	0.953298	33985	ADD	-0.139093	0.0200382	48.183	11.4109	NA	3.88e-12	AGT	rs116791031	0.00141576	48.1801
AGT_P01019_OID30709_v1_Inflammation_II_expo_rt.txt	chr1	230676583	1:230812329:C:T:imp:v1	C	T	0.124048	1.00215	33985	ADD	0.462989	0.0113573	1661.83	362.571	NA	0	AGT	rs12046036	0.0466198	1661.75
AGT_P01019_OID30709_v1_Inflammation_II_expo_rt.txt	chr1	230687157	1:230822903:C:T:imp:v1	C	T	0.106109	0.963952	33985	ADD	-0.132253	0.0123975	113.8	25.8413	NA	1.44e-26	AGT	rs2493147	0.00333737	113.793
AGT_P01019_OID30709_v1_Inflammation_II_expo_rt.txt	chr1	230700988	1:230836734:A:G:imp:v1	A	G	0.0698919	0.978085	33985	ADD	0.12233	0.0148648	67.725	15.7259	NA	1.88e-16	AGT	rs61751101	0.00198882	67.7208
AGT_P01019_OID30709_v1_Inflammation_II_expo_rt.txt	chr1	230709246	1:230844992:C:T:imp:v1	C	T	0.359922	0.998388	33985	ADD	0.347413	0.0078162	1975.61	430.744	NA	0	AGT	rs6687360	0.0549381	1975.49
AGT_P01019_OID30709_v1_Inflammation_II_expo_rt.txt	chr1	230709809	1:230845555:G:A:imp:v1	G	A	0.0625717	1.00097	33985	ADD	-0.181415	0.0154649	137.61	31.0522	NA	8.87e-32	AGT	rs11568054	0.00403283	137.603
AGT_P01019_OID30709_v1_Inflammation_II_expo_rt.txt	chr1	230714505	1:230850251:C:T:imp:v1	C	T	0.014746	0.97612	33985	ADD	0.752997	0.0314754	572.326	125.757	NA	1.75e-126	AGT	rs5047	0.0165617	572.293
AGT_P01019_OID30709_v1_Inflammation_II_expo_rt.txt	chr1	230716169	1:230851915:T:G:imp:v1	T	G	0.0287774	1.00511	33985	ADD	0.612016	0.0223665	748.736	164.122	NA	7.55e-165	AGT	rs11568048	0.0215565	748.693
AGT_P01019_OID30709_v1_Inflammation_II_expo_rt.txt	chr1	230719400	1:230855146:C:T:imp:v1	C	T	0.100064	0.990706	33985	ADD	-0.116882	0.0125513	86.7195	19.9029	NA	1.25e-20	AGT	rs7512987	0.00254521	86.7146
AGT_P01019_OID30709_v1_Inflammation_II_expo_rt.txt	chr1	230722513	1:230858259:T:C:imp:v1	T	C	0.0103889	0.894374	33985	ADD	0.700602	0.0390859	321.294	71.1209	NA	7.57e-72	AGT	rs190169797	0.00936545	321.275
AGT_P01019_OID30709_v1_Inflammation_II_expo_rt.txt	chr1	230738065	1:230873811:G:A:imp:v1	G	A	0.063575	0.9523	33985	ADD	-0.17223	0.0157405	119.724	27.1384	NA	7.27e-28	AGT	rs6657006	0.00351048	119.717
AGT_P01019_OID30709_v1_Inflammation_II_expo_rt.txt	chr1	230745009	1:230880755:G:A:imp:v1	G	A	0.166117	0.991967	33985	ADD	-0.141852	0.0101095	196.883	43.9999	NA	1e-44	AGT	rs17787522	0.00575991	196.873
AGT_P01019_OID30709_v1_Inflammation_II_expo_rt.txt	chr1	230745317	1:230881063:C:T:imp:v1	C	T	0.355733	0.853312	33985	ADD	0.0522062	0.00847603	37.9367	9.13622	NA	7.31e-10	AGT	rs2478540	0.00111503	37.9344
AGT_P01019_OID30709_v1_Inflammation_II_expo_rt.txt	chr1	230746300	1:230882046:C:T:imp:v1	C	T	0.108757	0.975353	33985	ADD	0.30609	0.0121877	630.746	138.463	NA	3.44e-139	AGT	rs58463006	0.0182214	630.709
AGT_P01019_OID30709_v1_Inflammation_II_expo_rt.txt	chr1	230750625	1:230886371:G:A:imp:v1	G	A	0.436778	0.987235	33985	ADD	0.0829451	0.00760604	118.923	26.963	NA	1.09e-27	AGT	rs1887208	0.00348706	118.916
AGT_P01019_OID30709_v1_Inflammation_II_expo_rt.txt	chr1	230753789	1:230889535:G:T:imp:v1	G	T	0.950493	0.994813	33985	ADD	0.11803	0.0173255	46.4103	11.0181	NA	9.59e-12	AGT	rs3000063	0.00136374	46.4074
AGT_P01019_OID30709_v1_Inflammation_II_expo_rt.txt	chr1	230759172	1:230894918:C:T:imp:v1	C	T	0.0734717	0.983474	33985	ADD	-0.0981041	0.0144887	45.8474	10.8934	NA	1.28e-11	AGT	rs28359606	0.00134723	45.8448
AGT_P01019_OID30709_v1_Inflammation_II_expo_rt.txt	chr1	230778960	1:230914706:C:A:imp:v1	C	A	0.157056	1.00199	33985	ADD	0.142799	0.0102904	192.57	43.0587	NA	8.74e-44	AGT	rs1933630	0.00563436	192.557
AGT_P01019_OID30709_v1_Inflammation_II_expo_rt.txt	chr1	230794857	1:230930603:C:G:imp:v1	C	G	0.0367368	0.986807	33985	ADD	-0.150816	0.0200589	56.5302	13.257	NA	5.53e-14	AGT	rs7556577	0.00166062	56.5269
AGT_P01019_OID30709_v1_Inflammation_II_expo_rt.txt	chr1	230804508	1:230940254:G:C:imp:v1	G	C	0.594912	0.994634	33985	ADD	0.0491871	0.00765595	41.2767	9.87898	NA	1.32e-10	AGT	rs11122607	0.00121308	41.2742
AGT_P01019_OID30709_v1_Inflammation_II_expo_rt.txt	chr1	230818751	1:230954497:A:G:imp:v1	A	G	0.874886	0.96521	33985	ADD	0.128502	0.0115337	124.131	28.1031	NA	7.89e-29	AGT	rs1202527	0.00363925	124.124
AGT_P01019_OID30709_v1_Inflammation_II_expo_rt.txt	chr1	230825806	1:230961552:G:A:imp:v1	G	A	0.0216419	1.00845	33985	ADD	0.208127	0.0256556	65.81	15.304	NA	4.97e-16	AGT	rs34676964	0.0019327	65.8062
AGT_P01019_OID30709_v1_Inflammation_II_expo_rt.txt	chr1	230827984	1:230963730:A:G:imp:v1	A	G	0.204029	0.951121	33985	ADD	0.0567211	0.00953917	35.3564	8.56136	NA	2.75e-09	AGT	rs78977568	0.00103927	35.3543
AGT_P01019_OID30709_v1_Inflammation_II_expo_rt.txt	chr1	230838746	1:230974492:G:A:imp:v1	G	A	0.0131589	0.934075	33985	ADD	-0.222065	0.0340293	42.5846	10.1695	NA	6.77e-11	AGT	rs79595270	0.00125148	42.5823
AGT_P01019_OID30709_v1_Inflammation_II_expo_rt.txt	chr1	230886024	1:231021770:T:C:imp:v1	T	C	0.522182	1.00083	33985	ADD	-0.0850052	0.00750195	128.393	29.0359	NA	9.21e-30	AGT	rs4028814	0.00376372	128.386
AGT_P01019_OID30709_v1_Inflammation_II_expo_rt.txt	chr1	230915795	1:231051541:C:A:imp:v1	C	A	0.17898	0.847396	33985	ADD	0.102539	0.0106199	93.2265	21.3312	NA	4.66e-22	AGT	rs34943600	0.00273565	93.2206
AGT_P01019_OID30709_v1_Inflammation_II_expo_rt.txt	chr1	230928321	1:231064067:T:C:imp:v1	T	C	0.0189333	0.926315	33985	ADD	0.227597	0.0285704	63.4605	14.7862	NA	1.64e-15	AGT	rs144500588	0.00186382	63.4563
AGT_P01019_OID30709_v1_Inflammation_II_expo_rt.txt	chr1	230935667	1:231071413:T:C:imp:v1	T	C	0.0106518	1.00319	33985	ADD	0.295184	0.0364578	65.5548	15.2478	NA	5.65e-16	AGT	rs75559594	0.00192522	65.551
AGT_P01019_OID30709_v1_Inflammation_II_expo_rt.txt	chr1	230976771	1:231112517:G:A:imp:v1	G	A	0.0663563	0.951277	33985	ADD	-0.112084	0.0154396	52.7003	12.4106	NA	3.89e-13	AGT	rs72746703	0.0015483	52.6974
AGT_P01019_OID30709_v1_Inflammation_II_expo_rt.txt	chr1	230978674	1:231114420:A:C:imp:v1	A	C	0.0728036	0.967995	33985	ADD	0.1865	0.0146614	161.811	36.3419	NA	4.55e-37	AGT	rs114508011	0.00473867	161.801
AGT_P01019_OID30709_v1_Inflammation_II_expo_rt.txt	chr1	231019753	1:231155499:G:C:imp:v1	G	C	0.0112125	0.954324	33985	ADD	0.26654	0.0364382	53.5069	12.5889	NA	2.58e-13	AGT	rs145296244	0.00157196	53.5039
AGT_P01019_OID30709_v1_Inflammation_II_expo_rt.txt	chr1	231034255	1:231170001:C:T:imp:v1	C	T	0.0106036	0.8939	33985	ADD	0.413832	0.0386969	114.366	25.9651	NA	1.08e-26	AGT	rs184354646	0.00335389	114.359
AGT_P01019_OID30709_v1_Inflammation_II_expo_rt.txt	chr1	231064760	1:231200506:T:C:imp:v1	T	C	0.243822	0.987816	33985	ADD	0.0590879	0.00878326	45.257	10.7625	NA	1.73e-11	AGT	rs6701101	0.0013299	45.2543
AGT_P01019_OID30709_v1_Inflammation_II_expo_rt.txt	chr1	231130453	1:231266199:C:G:imp:v1	C	G	0.259629	0.999259	33985	ADD	0.0504453	0.00855545	34.7661	8.42969	NA	3.72e-09	AGT	rs3795654	0.00102194	34.764
AGT_P01019_OID30709_v1_Inflammation_II_expo_rt.txt	chr1	231134890	1:231270636:A:G:imp:v1	A	G	0.23425	1.0056	33985	ADD	-0.0506261	0.00882454	32.9128	8.01598	NA	9.64e-09	AGT	rs12023396	0.000967514	32.9109
AGT_P01019_OID30709_v1_Inflammation_II_expo_rt.txt	chr1	231437239	1:231572985:T:C:imp:v1	T	C	0.42482	0.991623	33985	ADD	0.0435537	0.00761873	32.6802	7.96402	NA	1.09e-08	AGT	rs1765798	0.000960683	32.6783
AGT_P01019_OID30709_v1_Inflammation_II_expo_rt.txt	chr1	231483301	1:231619047:A:G:imp:v1	A	G	0.0355817	0.997764	33985	ADD	0.147853	0.0202602	53.2561	12.5335	NA	2.93e-13	AGT	rs6673974	0.00156461	53.2534
AGXT_P21549_OID20139_v1_Cardiometabolic_expo_rt.txt	chr2	240601228	2:241540645:G:A:imp:v1	G	A	0.0199469	0.964879	33693	ADD	-0.188323	0.0268617	49.1521	11.6255	NA	2.37e-12	AGXT	rs116625530	0.00145669	49.1489
AGXT_P21549_OID20139_v1_Cardiometabolic_expo_rt.txt	chr2	240630867	2:241570284:C:T:imp:v1	C	T	0.010418	0.890021	33693	ADD	-0.220308	0.0385321	32.6901	7.96623	NA	1.08e-08	AGXT	rs142918765	0.000969291	32.6881
AGXT_P21549_OID20139_v1_Cardiometabolic_expo_rt.txt	chr2	240639533	2:241578950:G:A:imp:v1	G	A	0.086443	0.996905	33693	ADD	0.075841	0.0131405	33.3107	8.10486	NA	7.85e-09	AGXT	rs115697922	0.000987678	33.3088
AGXT_P21549_OID20139_v1_Cardiometabolic_expo_rt.txt	chr2	240675306	2:241614723:C:A:imp:v1	C	A	0.607685	0.98179	33693	ADD	-0.052617	0.00762118	47.6659	11.2964	NA	5.05e-12	AGXT	rs113208844	0.00141271	47.6631
AGXT_P21549_OID20139_v1_Cardiometabolic_expo_rt.txt	chr2	240701377	2:241640794:G:A:imp:v1	G	A	0.539813	0.970579	33693	ADD	-0.0510761	0.00751147	46.2366	10.9796	NA	1.05e-11	AGXT	rs7586747	0.00137041	46.2338
AGXT_P21549_OID20139_v1_Cardiometabolic_expo_rt.txt	chr2	240734032	2:241673449:A:G:imp:v1	A	G	0.306012	0.962896	33693	ADD	0.0526547	0.00815676	41.6715	9.96668	NA	1.08e-10	AGXT	rs67643017	0.00123527	41.669
AGXT_P21549_OID20139_v1_Cardiometabolic_expo_rt.txt	chr2	240736369	2:241675786:G:A:imp:v1	G	A	0.18217	0.954777	33693	ADD	-0.108117	0.00977546	122.326	27.708	NA	1.96e-28	AGXT	rs55732147	0.00361743	122.317
AGXT_P21549_OID20139_v1_Cardiometabolic_expo_rt.txt	chr2	240738324	2:241677741:C:T:imp:v1	C	T	0.0136824	0.986128	33693	ADD	-0.231516	0.0319714	52.4371	12.3524	NA	4.44e-13	AGXT	rs114954029	0.0015539	52.434
AGXT_P21549_OID20139_v1_Cardiometabolic_expo_rt.txt	chr2	240782213	2:241721630:G:A:imp:v1	G	A	0.0516322	0.920136	33693	ADD	0.153965	0.0173675	78.59	18.1167	NA	7.64e-19	AGXT	rs113652636	0.00232711	78.5857
AGXT_P21549_OID20139_v1_Cardiometabolic_expo_rt.txt	chr2	240817887	2:241757304:G:A:imp:v1	G	A	0.0133361	0.839103	33693	ADD	-0.278407	0.0350877	62.9578	14.6753	NA	2.11e-15	AGXT	rs141484895	0.00186509	62.9542
AGXT_P21549_OID20139_v1_Cardiometabolic_expo_rt.txt	chr2	240817932	2:241757349:G:C:imp:v1	G	C	0.498551	1.00067	33693	ADD	0.165719	0.0073707	505.504	111.22	NA	6.03e-112	AGXT	rs6725635	0.0147816	505.477
AGXT_P21549_OID20139_v1_Cardiometabolic_expo_rt.txt	chr2	240840378	2:241779795:G:A:imp:v1	G	A	0.0708026	0.988722	33693	ADD	0.0975188	0.0144559	45.5077	10.818	NA	1.52e-11	AGXT	rs77415253	0.00134884	45.5052
AGXT_P21549_OID20139_v1_Cardiometabolic_expo_rt.txt	chr2	240847503	2:241786920:A:G:imp:v1	A	G	0.0338349	1.0022	33693	ADD	-0.20159	0.0203704	97.9361	22.3644	NA	4.32e-23	AGXT	rs79085467	0.00289827	97.9294
AGXT_P21549_OID20139_v1_Cardiometabolic_expo_rt.txt	chr2	240848293	2:241787710:C:T:imp:v1	C	T	0.0434148	0.775329	33693	ADD	-0.300703	0.0205468	214.184	47.7749	NA	1.68e-48	AGXT	rs111487292	0.00631678	214.171
AGXT_P21549_OID20139_v1_Cardiometabolic_expo_rt.txt	chr2	240854128	2:241793545:G:A:imp:v1	G	A	0.310011	0.987906	33693	ADD	-0.287678	0.00802437	1285.26	280.744	NA	1.8e-281	AGXT	rs55649245	0.0367446	1285.18
AGXT_P21549_OID20139_v1_Cardiometabolic_expo_rt.txt	chr2	240861556	2:241800973:G:A:imp:v1	G	A	0.0176001	0.995817	33693	ADD	0.15573	0.0281063	30.7	7.52119	NA	3.01e-08	AGXT	rs77072348	0.000910337	30.6981
AGXT_P21549_OID20139_v1_Cardiometabolic_expo_rt.txt	chr2	240868545	2:241807962:G:A:imp:v1	G	A	0.02039	0.998502	33693	ADD	-0.265715	0.0261302	103.406	23.5639	NA	2.73e-24	AGXT	rs34927888	0.00305968	103.4
AGXT_P21549_OID20139_v1_Cardiometabolic_expo_rt.txt	chr2	240873378	2:241812795:C:G:imp:v1	C	G	0.981029	0.900492	33693	ADD	-0.174119	0.0284859	37.3621	9.00828	NA	9.81e-10	AGXT	rs11691745	0.00110767	37.36
AGXT_P21549_OID20139_v1_Cardiometabolic_expo_rt.txt	chr2	240874407	2:241813824:C:A:imp:v1	C	A	0.0327397	0.884901	33693	ADD	0.164768	0.0220393	55.8919	13.1159	NA	7.66e-14	AGXT	rs111465259	0.00165612	55.8887
AGXT_P21549_OID20139_v1_Cardiometabolic_expo_rt.txt	chr2	240887275	2:241826692:G:A:imp:v1	G	A	0.0123826	0.936151	33693	ADD	0.191401	0.0344622	30.8464	7.55395	NA	2.79e-08	AGXT	rs145078376	0.000914672	30.8444
AGXT_P21549_OID20139_v1_Cardiometabolic_expo_rt.txt	chr2	240889430	2:241828847:C:T:imp:v1	C	T	0.0298033	0.945441	33693	ADD	0.145509	0.0222967	42.5895	10.1706	NA	6.75e-11	AGXT	rs75453643	0.00126244	42.5866
AGXT_P21549_OID20139_v1_Cardiometabolic_expo_rt.txt	chr2	240900394	2:241839811:G:A:imp:v1	G	A	0.0765487	0.987833	33693	ADD	-0.0959955	0.0139602	47.2847	11.2119	NA	6.14e-12	AGXT	rs77029380	0.00140142	47.2817
AGXT_P21549_OID20139_v1_Cardiometabolic_expo_rt.txt	chr2	240924323	2:241863740:G:A:imp:v1	G	A	0.015744	0.8196	33693	ADD	0.2041	0.0327134	38.9255	9.35626	NA	4.4e-10	AGXT	rs191237156	0.00115397	38.9232
AGXT_P21549_OID20139_v1_Cardiometabolic_expo_rt.txt	chr2	240925739	2:241865156:T:C:imp:v1	T	C	0.672426	0.982317	33693	ADD	-0.16235	0.00792973	419.165	92.4309	NA	3.71e-93	AGXT	rs4675847	0.0122879	419.143
AGXT_P21549_OID20139_v1_Cardiometabolic_expo_rt.txt	chr2	240939465	2:241878882:G:A:imp:v1	G	A	0.0142889	0.912515	33693	ADD	0.201504	0.0325199	38.3944	9.23808	NA	5.78e-10	AGXT	rs138872838	0.00113824	38.3922
AGXT_P21549_OID20139_v1_Cardiometabolic_expo_rt.txt	chr2	240941004	2:241880421:T:A:imp:v1	T	A	0.0590279	0.937397	33693	ADD	-0.255914	0.0161636	250.673	55.7323	NA	1.85e-56	AGXT	rs114982800	0.00738504	250.661
AGXT_P21549_OID20139_v1_Cardiometabolic_expo_rt.txt	chr2	240943330	2:241882747:C:T:imp:v1	C	T	0.0190838	0.986768	33693	ADD	-0.248856	0.0271445	84.0492	19.3164	NA	4.83e-20	AGXT	rs13405273	0.00248835	84.044
AGXT_P21549_OID20139_v1_Cardiometabolic_expo_rt.txt	chr2	240970226	2:241909643:G:A:imp:v1	G	A	0.0106073	0.963488	33693	ADD	-0.269809	0.0367006	54.0461	12.7081	NA	1.96e-13	AGXT	rs4072370	0.00160151	54.0432
AGXT_P21549_OID20139_v1_Cardiometabolic_expo_rt.txt	chr2	241005924	2:241945341:G:A:imp:v1	G	A	0.0502627	0.991221	33693	ADD	-0.110737	0.0169534	42.6651	10.1874	NA	6.5e-11	AGXT	rs80028554	0.00126469	42.6625
AHCY_P23526_OID20199_v1_Cardiometabolic_expo_rt.txt	chr20	33866049	20:32453855:G:A:imp:v1	G	A	0.0509514	0.949196	33693	ADD	-0.122146	0.0175002	48.7167	11.5291	NA	2.96e-12	AHCY	rs79881952	0.00144379	48.7132
AHCY_P23526_OID20199_v1_Cardiometabolic_expo_rt.txt	chr20	34022238	20:32610044:C:T:imp:v1	C	T	0.0156169	0.946243	33693	ADD	-1.33701	0.0310903	1849.34	403.31	NA	0	AHCY	rs143272538	0.0520323	1849.24
AHCY_P23526_OID20199_v1_Cardiometabolic_expo_rt.txt	chr20	34186283	20:32774089:C:A:imp:v1	C	A	0.190479	0.945826	33693	ADD	-0.0966505	0.00981743	96.9197	22.1415	NA	7.22e-23	AHCY	rs13042965	0.00286831	96.9141
AHCY_P23526_OID20199_v1_Cardiometabolic_expo_rt.txt	chr20	34666529	20:33254333:T:A:imp:v1	T	A	0.0230268	0.752365	33693	ADD	-0.201116	0.0288233	48.6863	11.5224	NA	3e-12	AHCY	rs144238017	0.00144291	48.6833
AHCY_P23526_OID20199_v1_Cardiometabolic_expo_rt.txt	chr20	34673845	20:33261649:G:A:imp:v1	G	A	0.457212	0.977138	33693	ADD	0.0481987	0.0076139	40.0734	9.61156	NA	2.45e-10	AHCY	rs6059976	0.00118796	40.071
AHCY_P23526_OID20199_v1_Cardiometabolic_expo_rt.txt	chr20	34910531	20:33498334:C:T:imp:v1	C	T	0.0361181	0.965575	33693	ADD	-0.46111	0.0204465	508.596	111.892	NA	1.28e-112	AHCY	rs117954130	0.0148705	508.564
AHCY_P23526_OID20199_v1_Cardiometabolic_expo_rt.txt	chr20	35105376	20:33693179:T:G:imp:v1	T	G	0.264571	0.914679	33693	ADD	-0.0566715	0.0088923	40.6164	9.73225	NA	1.85e-10	AHCY	rs6141533	0.00120403	40.614
AHCY_P23526_OID20199_v1_Cardiometabolic_expo_rt.txt	chr20	35236029	20:33823832:T:C:imp:v1	T	C	0.74418	0.948055	33693	ADD	0.059383	0.00883726	45.1532	10.7394	NA	1.82e-11	AHCY	rs2425020	0.00133834	45.1506
AHCY_P23526_OID20199_v1_Cardiometabolic_expo_rt.txt	chr20	35276444	20:33864247:G:A:imp:v1	G	A	0.0186834	0.997149	33693	ADD	-0.609219	0.0277332	482.554	106.226	NA	5.94e-107	AHCY	rs34569456	0.0141199	482.526
AHNAK2_Q8IVF2_OID30244_v1_Cardiometabolic_II_expo_rt.txt	chr14	104812743	14:105279080:G:A:imp:v1	G	A	0.146457	0.889601	33042	ADD	-0.0789578	0.0113431	48.4538	11.4709	NA	3.38e-12	AHNAK2	rs7144760	0.00146428	48.4507
AHNAK2_Q8IVF2_OID30244_v1_Cardiometabolic_II_expo_rt.txt	chr14	104822011	14:105288348:G:A:imp:v1	G	A	0.0630679	0.820829	33042	ADD	0.138947	0.0171732	65.4634	15.2277	NA	5.92e-16	AHNAK2	rs61995971	0.00197729	65.459
AHNAK2_Q8IVF2_OID30244_v1_Cardiometabolic_II_expo_rt.txt	chr14	104873223	14:105339560:G:C:imp:v1	G	C	0.509549	0.929775	33042	ADD	0.0821382	0.00785181	109.434	24.8847	NA	1.3e-25	AHNAK2	rs28460540	0.00330102	109.427
AHNAK2_Q8IVF2_OID30244_v1_Cardiometabolic_II_expo_rt.txt	chr14	104883841	14:105350178:C:T:imp:v1	C	T	0.401332	0.807409	33042	ADD	0.0486419	0.00858794	32.0807	7.83003	NA	1.48e-08	AHNAK2	rs45449696	0.000969963	32.0787
AHNAK2_Q8IVF2_OID30244_v1_Cardiometabolic_II_expo_rt.txt	chr14	104906882	14:105373219:G:C:imp:v1	G	C	0.0236327	0.693802	33042	ADD	-0.193126	0.029904	41.7085	9.9749	NA	1.06e-10	AHNAK2	rs183632340	0.00126069	41.7058
AHNAK2_Q8IVF2_OID30244_v1_Cardiometabolic_II_expo_rt.txt	chr14	104918904	14:105385241:C:T:imp:v1	C	T	0.137182	0.839824	33042	ADD	-0.165158	0.011999	189.455	42.3788	NA	4.18e-43	AHNAK2	rs10138660	0.00570111	189.445
AHNAK2_Q8IVF2_OID30244_v1_Cardiometabolic_II_expo_rt.txt	chr14	104951261	14:105417598:G:A:imp:v1	G	A	0.0281763	0.973217	33042	ADD	-0.479401	0.0231714	428.049	94.3646	NA	4.32e-95	AHNAK2	rs201134968	0.012789	428.023
AHNAK2_Q8IVF2_OID30244_v1_Cardiometabolic_II_expo_rt.txt	chr14	104951557	14:105417894:C:G:imp:v1	C	G	0.810912	0.814117	33042	ADD	0.0825825	0.0107031	59.5333	13.9199	NA	1.2e-14	AHNAK2	rs2819440	0.00179849	59.5293
AHNAK2_Q8IVF2_OID30244_v1_Cardiometabolic_II_expo_rt.txt	chr14	104952897	14:105419234:T:C:imp:v1	T	C	0.041992	0.99604	33042	ADD	-0.394628	0.0188959	436.154	96.1285	NA	7.44e-97	AHNAK2	rs74090129	0.013028	436.128
AHNAK2_Q8IVF2_OID30244_v1_Cardiometabolic_II_expo_rt.txt	chr14	104961241	14:105427578:A:G:imp:v1	A	G	0.0954719	0.865463	33042	ADD	0.1458	0.013838	111.012	25.2305	NA	5.88e-26	AHNAK2	rs113837512	0.00334846	111.005
AHNAK2_Q8IVF2_OID30244_v1_Cardiometabolic_II_expo_rt.txt	chr14	104961443	14:105427780:G:A:imp:v1	G	A	0.15463	0.839506	33042	ADD	0.0755421	0.0114165	43.7839	10.4357	NA	3.67e-11	AHNAK2	rs185730426	0.00132334	43.781
AHNAK2_Q8IVF2_OID30244_v1_Cardiometabolic_II_expo_rt.txt	chr14	104970720	14:105437057:A:C:imp:v1	A	C	0.642451	0.995415	33042	ADD	0.215521	0.00790973	742.429	162.75	NA	1.78e-163	AHNAK2	rs9805957	0.0219755	742.386
AHNAK2_Q8IVF2_OID30244_v1_Cardiometabolic_II_expo_rt.txt	chr14	104977660	14:105443997:C:T:imp:v1	C	T	0.0625738	0.930433	33042	ADD	0.101975	0.0161904	39.6712	9.52213	NA	3.01e-10	AHNAK2	rs79062923	0.00119918	39.6685
AHNAK2_Q8IVF2_OID30244_v1_Cardiometabolic_II_expo_rt.txt	chr14	104982769	14:105449106:C:T:imp:v1	C	T	0.0216694	0.993554	33042	ADD	-0.15496	0.0260727	35.3239	8.55411	NA	2.79e-09	AHNAK2	rs11625252	0.00106792	35.3216
AHNAK2_Q8IVF2_OID30244_v1_Cardiometabolic_II_expo_rt.txt	chr14	104997951	14:105464288:G:A:imp:v1	G	A	0.0179839	0.989339	33042	ADD	-0.344733	0.0286161	145.126	32.6955	NA	2.02e-33	AHNAK2	rs146460135	0.00437296	145.117
AHNAK2_Q8IVF2_OID30244_v1_Cardiometabolic_II_expo_rt.txt	chr14	105003700	14:105470037:A:G:imp:v1	A	G	0.0597122	0.993718	33042	ADD	-0.124078	0.0160131	60.04	14.0318	NA	9.29e-15	AHNAK2	rs111697633	0.00181378	60.0361
AHNAK2_Q8IVF2_OID30244_v1_Cardiometabolic_II_expo_rt.txt	chr14	105091165	14:105557502:C:A:imp:v1	C	A	0.0392258	0.885057	33042	ADD	0.165365	0.0207083	63.7674	14.8538	NA	1.4e-15	AHNAK2	rs118008550	0.00192617	63.7635
AHNAK2_Q8IVF2_OID30244_v1_Cardiometabolic_II_expo_rt.txt	chr14	105093152	14:105559489:G:C:imp:v1	G	C	0.163443	1.00007	33042	ADD	-0.100766	0.0102304	97.0155	22.1625	NA	6.88e-23	AHNAK2	rs55849896	0.00292754	97.01
AHNAK2_Q8IVF2_OID30244_v1_Cardiometabolic_II_expo_rt.txt	chr14	105113604	14:105579941:C:CA:imp:v1	C	CA	0.638315	0.973455	33042	ADD	0.11974	0.00797895	225.208	50.1795	NA	6.61e-51	AHNAK2	rs372691425	0.00676972	225.196
AHNAK2_Q8IVF2_OID30244_v1_Cardiometabolic_II_expo_rt.txt	chr14	105130629	14:105596966:T:TAAA:imp:v1	T	TAAA	0.770982	0.987325	33042	ADD	0.0963833	0.00905788	113.227	25.7157	NA	1.92e-26	AHNAK2	rs114725345	0.00341506	113.22
AHNAK2_Q8IVF2_OID30244_v1_Cardiometabolic_II_expo_rt.txt	chr14	105155719	14:105622056:A:G:imp:v1	A	G	0.938314	0.9832	33042	ADD	0.0991022	0.0158531	39.0784	9.39027	NA	4.07e-10	AHNAK2	rs2816679	0.00118129	39.0762
AHNAK2_Q8IVF2_OID30244_v1_Cardiometabolic_II_expo_rt.txt	chr14	105170250	14:105636587:G:A:imp:v1	G	A	0.613719	0.99677	33042	ADD	-0.062218	0.00778362	63.8953	14.882	NA	1.31e-15	AHNAK2	rs4146328	0.00193003	63.8914
AHNAK2_Q8IVF2_OID30244_v1_Cardiometabolic_II_expo_rt.txt	chr14	105199402	14:105665739:C:T:imp:v1	C	T	0.019867	0.755018	33042	ADD	-0.20555	0.0311929	43.4233	10.3556	NA	4.41e-11	AHNAK2	rs142317644	0.00131246	43.4207
AHNAK2_Q8IVF2_OID30244_v1_Cardiometabolic_II_expo_rt.txt	chr14	105212569	14:105678906:A:T:imp:v1	A	T	0.371736	0.979486	33042	ADD	-0.0479567	0.00791248	36.7344	8.86848	NA	1.35e-09	AHNAK2	rs3784231	0.00111052	36.7322
AHNAK_Q09666_OID30260_v1_Cardiometabolic_II_expo_rt.txt	chr11	62311829	11:62079301:T:C:imp:v1	T	C	0.0128317	0.898725	33042	ADD	-0.193361	0.0346315	31.1742	7.6273	NA	2.36e-08	AHNAK	rs140297612	0.000942582	31.1723
AHNAK_Q09666_OID30260_v1_Cardiometabolic_II_expo_rt.txt	chr11	62478626	11:62246098:T:C:imp:v1	T	C	0.421687	0.951247	33042	ADD	-0.0444401	0.00767099	33.562	8.16098	NA	6.9e-09	AHNAK	rs563143	0.00101471	33.5599
AHNAK_Q09666_OID30260_v1_Cardiometabolic_II_expo_rt.txt	chr11	62481104	11:62248576:G:T:imp:v1	G	T	0.0293394	0.790245	33042	ADD	-0.134578	0.0246293	29.857	7.33244	NA	4.65e-08	AHNAK	rs12290042	0.000902787	29.855
AHNAK_Q09666_OID30260_v1_Cardiometabolic_II_expo_rt.txt	chr11	62526476	11:62293948:G:A:imp:v1	G	A	0.773378	0.962412	33042	ADD	0.0728091	0.00899468	65.5239	15.241	NA	5.74e-16	AHNAK	rs486903	0.00197912	65.52
AHNAK_Q09666_OID30260_v1_Cardiometabolic_II_expo_rt.txt	chr11	62529129	11:62296601:T:C:imp:v1	T	C	0.0280249	0.997832	33042	ADD	-0.473173	0.0224177	445.51	98.1647	NA	6.84e-99	AHNAK	rs74853209	0.0133038	445.483
AHNAK_Q09666_OID30260_v1_Cardiometabolic_II_expo_rt.txt	chr11	62548723	11:62316195:C:G:imp:v1	C	G	0.373037	1.00549	33042	ADD	0.0515157	0.00761946	45.712	10.8633	NA	1.37e-11	AHNAK	rs11231138	0.00138154	45.7093
AHNAK_Q09666_OID30260_v1_Cardiometabolic_II_expo_rt.txt	chr11	62652165	11:62419637:C:CA:imp:v1	C	CA	0.697916	0.768804	33042	ADD	0.0556303	0.00917892	36.7316	8.86785	NA	1.36e-09	AHNAK	rs201224172	0.00111043	36.7294
AHNAK_Q09666_OID30260_v1_Cardiometabolic_II_expo_rt.txt	chr11	62897014	11:62664486:C:T:imp:v1	C	T	0.230611	0.978936	33042	ADD	-0.0546266	0.00886968	37.9307	9.13489	NA	7.33e-10	AHNAK	rs12804436	0.00114664	37.9285
AHSG_P02765_OID30706_v1_Inflammation_II_expo_rt.txt	chr3	186291970	3:186009759:A:G:imp:v1	A	G	0.0318817	1.01378	33985	ADD	-0.192348	0.0214289	80.5707	18.5521	NA	2.8e-19	AHSG	rs114539921	0.00236516	80.5657
AHSG_P02765_OID30706_v1_Inflammation_II_expo_rt.txt	chr3	186295846	3:186013635:T:C:imp:v1	T	C	0.876267	0.959372	33985	ADD	-0.0684163	0.0117452	33.9309	8.24334	NA	5.71e-09	AHSG	rs6768234	0.000997419	33.9291
AHSG_P02765_OID30706_v1_Inflammation_II_expo_rt.txt	chr3	186295991	3:186013780:C:T:imp:v1	C	T	0.346037	0.986003	33985	ADD	-0.0599486	0.00802011	55.8723	13.1116	NA	7.73e-14	AHSG	rs13086383	0.00164133	55.8691
AHSG_P02765_OID30706_v1_Inflammation_II_expo_rt.txt	chr3	186323062	3:186040851:C:T:imp:v1	C	T	0.0382659	0.933615	33985	ADD	-0.256466	0.0204377	157.469	35.3934	NA	4.04e-36	AHSG	rs77275504	0.00461212	157.46
AHSG_P02765_OID30706_v1_Inflammation_II_expo_rt.txt	chr3	186326126	3:186043915:T:C:imp:v1	T	C	0.017608	0.93087	33985	ADD	0.190772	0.029859	40.8205	9.7776	NA	1.67e-10	AHSG	rs147755428	0.00119969	40.8181
AHSG_P02765_OID30706_v1_Inflammation_II_expo_rt.txt	chr3	186338574	3:186056363:G:A:imp:v1	G	A	0.0539796	0.935872	33985	ADD	0.103397	0.0173273	35.6085	8.61757	NA	2.41e-09	AHSG	rs77021071	0.00104667	35.6064
AHSG_P02765_OID30706_v1_Inflammation_II_expo_rt.txt	chr3	186357183	3:186074972:A:G:imp:v1	A	G	0.954774	1.00033	33985	ADD	0.12146	0.0182269	44.4064	10.5738	NA	2.67e-11	AHSG	rs4234593	0.00130493	44.4033
AHSG_P02765_OID30706_v1_Inflammation_II_expo_rt.txt	chr3	186363008	3:186080797:G:T:imp:v1	G	T	0.0554936	0.950054	33985	ADD	-0.210249	0.0169797	153.323	34.4873	NA	3.26e-35	AHSG	rs80325620	0.00449123	153.314
AHSG_P02765_OID30706_v1_Inflammation_II_expo_rt.txt	chr3	186370290	3:186088079:A:G:imp:v1	A	G	0.0531172	0.973787	33985	ADD	0.135437	0.0171195	62.5877	14.5937	NA	2.55e-15	AHSG	rs60125869	0.00183826	62.5845
AHSG_P02765_OID30706_v1_Inflammation_II_expo_rt.txt	chr3	186371096	3:186088885:C:T:imp:v1	C	T	0.509682	0.926219	33985	ADD	0.0489849	0.00787516	38.6907	9.30401	NA	4.97e-10	AHSG	rs6802330	0.00113717	38.6883
AHSG_P02765_OID30706_v1_Inflammation_II_expo_rt.txt	chr3	186371920	3:186089709:T:C:imp:v1	T	C	0.809887	0.966192	33985	ADD	0.182409	0.00982399	344.759	76.2315	NA	5.87e-77	AHSG	rs4615068	0.0100426	344.74
AHSG_P02765_OID30706_v1_Inflammation_II_expo_rt.txt	chr3	186375173	3:186092962:A:T:imp:v1	A	T	0.117619	0.939247	33985	ADD	0.118669	0.0121321	95.6754	21.8685	NA	1.35e-22	AHSG	rs35454572	0.00280734	95.6703
AHSG_P02765_OID30706_v1_Inflammation_II_expo_rt.txt	chr3	186386769	3:186104558:C:T:imp:v1	C	T	0.590636	0.969454	33985	ADD	0.153753	0.00782766	385.817	85.1714	NA	6.74e-86	AHSG	rs11719519	0.0112252	385.796
AHSG_P02765_OID30706_v1_Inflammation_II_expo_rt.txt	chr3	186388070	3:186105859:A:G:imp:v1	A	G	0.0142857	1.00013	33985	ADD	0.18676	0.0319106	34.2528	8.31518	NA	4.84e-09	AHSG	rs62290700	0.00100687	34.2509
AHSG_P02765_OID30706_v1_Inflammation_II_expo_rt.txt	chr3	186415270	3:186133059:T:C:imp:v1	T	C	0.0155303	0.763763	33985	ADD	0.205985	0.0350653	34.5076	8.37204	NA	4.25e-09	AHSG	rs189433019	0.00101435	34.5057
AHSG_P02765_OID30706_v1_Inflammation_II_expo_rt.txt	chr3	186421392	3:186139181:G:T:imp:v1	G	T	0.053794	0.931939	33985	ADD	-0.154226	0.0173913	78.6409	18.1279	NA	7.45e-19	AHSG	rs146265629	0.00230866	78.6367
AHSG_P02765_OID30706_v1_Inflammation_II_expo_rt.txt	chr3	186424873	3:186142662:A:T:imp:v1	A	T	0.0126186	0.789372	33985	ADD	0.412273	0.0381952	116.507	26.4341	NA	3.68e-27	AHSG	rs144749939	0.00341648	116.5
AHSG_P02765_OID30706_v1_Inflammation_II_expo_rt.txt	chr3	186428530	3:186146319:A:T:imp:v1	A	T	0.0532272	0.971224	33985	ADD	0.19295	0.017122	126.993	28.7296	NA	1.86e-29	AHSG	rs34080048	0.00372283	126.986
AHSG_P02765_OID30706_v1_Inflammation_II_expo_rt.txt	chr3	186436153	3:186153942:C:A:imp:v1	C	A	0.0462297	0.919063	33985	ADD	0.127616	0.0188167	45.9968	10.9265	NA	1.18e-11	AHSG	rs112179874	0.0013516	45.9936
AHSG_P02765_OID30706_v1_Inflammation_II_expo_rt.txt	chr3	186467603	3:186185392:G:A:imp:v1	G	A	0.0330448	0.992664	33985	ADD	0.235184	0.0212731	122.223	27.6856	NA	2.06e-28	AHSG	rs78552457	0.0035835	122.216
AHSG_P02765_OID30706_v1_Inflammation_II_expo_rt.txt	chr3	186478209	3:186195998:T:C:imp:v1	T	C	0.3402	1.00363	33985	ADD	0.0675428	0.00798262	71.5926	16.5775	NA	2.65e-17	AHSG	rs6789743	0.00210216	71.5882
AHSG_P02765_OID30706_v1_Inflammation_II_expo_rt.txt	chr3	186482135	3:186199924:C:A:imp:v1	C	A	0.0102989	0.983078	33985	ADD	-0.393416	0.0378456	108.063	24.5843	NA	2.6e-25	AHSG	rs186703728	0.00316962	108.056
AHSG_P02765_OID30706_v1_Inflammation_II_expo_rt.txt	chr3	186484362	3:186202151:T:C:imp:v1	T	C	0.023172	0.998378	33985	ADD	0.202996	0.0251995	64.8918	15.1017	NA	7.91e-16	AHSG	rs75536647	0.00190579	64.8882
AHSG_P02765_OID30706_v1_Inflammation_II_expo_rt.txt	chr3	186489704	3:186207493:T:C:imp:v1	T	C	0.0107776	0.889606	33985	ADD	0.27555	0.0388891	50.2049	11.8586	NA	1.38e-12	AHSG	rs148874900	0.00147508	50.2018
AHSG_P02765_OID30706_v1_Inflammation_II_expo_rt.txt	chr3	186495725	3:186213514:C:A:imp:v1	C	A	0.0236626	0.955899	33985	ADD	-0.308714	0.025494	146.635	33.0255	NA	9.43e-34	AHSG	rs62290743	0.00429615	146.626
AHSG_P02765_OID30706_v1_Inflammation_II_expo_rt.txt	chr3	186495995	3:186213784:A:G:imp:v1	A	G	0.862857	0.995666	33985	ADD	0.351315	0.0110432	1012.06	221.367	NA	4.3e-222	AHSG	rs11918665	0.0289183	1011.99
AHSG_P02765_OID30706_v1_Inflammation_II_expo_rt.txt	chr3	186501160	3:186218949:G:A:imp:v1	G	A	0.405133	1.00179	33985	ADD	0.168419	0.00771048	477.11	105.041	NA	9.1e-106	AHSG	rs7645347	0.0138445	477.083
AHSG_P02765_OID30706_v1_Inflammation_II_expo_rt.txt	chr3	186508895	3:186226684:C:T:imp:v1	C	T	0.0297043	1.00103	33985	ADD	0.198466	0.0223138	79.1087	18.2307	NA	5.88e-19	AHSG	rs55645028	0.00232235	79.1042
AHSG_P02765_OID30706_v1_Inflammation_II_expo_rt.txt	chr3	186512214	3:186230003:T:C:imp:v1	T	C	0.212711	1.00497	33985	ADD	0.145103	0.00923788	246.723	54.871	NA	1.35e-55	AHSG	rs745588	0.00720741	246.708
AHSG_P02765_OID30706_v1_Inflammation_II_expo_rt.txt	chr3	186516075	3:186233864:G:T:imp:v1	G	T	0.760924	1.00429	33985	ADD	0.438829	0.00886466	2450.56	533.926	NA	0	AHSG	rs4686784	0.0672575	2450.42
AHSG_P02765_OID30706_v1_Inflammation_II_expo_rt.txt	chr3	186516248	3:186234037:C:T:imp:v1	C	T	0.0257208	0.982498	33985	ADD	0.158331	0.0241396	43.0202	10.2662	NA	5.42e-11	AHSG	rs112628179	0.00126426	43.0176
AHSG_P02765_OID30706_v1_Inflammation_II_expo_rt.txt	chr3	186522308	3:186240097:C:T:imp:v1	C	T	0.227176	0.991258	33985	ADD	0.353364	0.00908282	1513.58	330.357	NA	0	AHSG	rs13063106	0.0426376	1513.48
AHSG_P02765_OID30706_v1_Inflammation_II_expo_rt.txt	chr3	186523666	3:186241455:A:C:imp:v1	A	C	0.0231191	0.836639	33985	ADD	-0.483927	0.0275608	308.302	68.2909	NA	5.12e-69	AHSG	rs79828486	0.00899015	308.284
AHSG_P02765_OID30706_v1_Inflammation_II_expo_rt.txt	chr3	186558135	3:186275924:T:C:imp:v1	T	C	0.0692364	1.00187	33985	ADD	0.272187	0.014909	333.302	73.7363	NA	1.84e-74	AHSG	rs74753001	0.00971207	333.282
AHSG_P02765_OID30706_v1_Inflammation_II_expo_rt.txt	chr3	186577079	3:186294868:G:C:imp:v1	G	C	0.0154092	0.908606	33985	ADD	0.358878	0.0322595	123.759	28.0218	NA	9.51e-29	AHSG	rs116570955	0.00362838	123.752
AHSG_P02765_OID30706_v1_Inflammation_II_expo_rt.txt	chr3	186578910	3:186296699:C:T:imp:v1	C	T	0.0111108	0.835245	33985	ADD	-0.487567	0.0395418	152.039	34.2068	NA	6.21e-35	AHSG	rs116168669	0.00445379	152.03
AHSG_P02765_OID30706_v1_Inflammation_II_expo_rt.txt	chr3	186588833	3:186306622:A:ACT:imp:v1	A	ACT	0.965667	0.970802	33985	ADD	0.510057	0.0211408	582.097	127.882	NA	1.31e-128	AHSG	rs201729259	0.0168396	582.062
AHSG_P02765_OID30706_v1_Inflammation_II_expo_rt.txt	chr3	186596945	3:186314734:G:A:imp:v1	G	A	0.0131534	0.867495	33985	ADD	0.366938	0.0357052	105.615	24.0479	NA	8.96e-25	AHSG	rs769324	0.00309804	105.608
AHSG_P02765_OID30706_v1_Inflammation_II_expo_rt.txt	chr3	186597446	3:186315235:G:C:imp:v1	G	C	0.0525329	0.946897	33985	ADD	0.339834	0.0174493	379.294	83.7514	NA	1.77e-84	AHSG	rs71322407	0.0110375	379.273
AHSG_P02765_OID30706_v1_Inflammation_II_expo_rt.txt	chr3	186597727	3:186315516:T:C:imp:v1	T	C	0.164903	0.989726	33985	ADD	0.205134	0.0102628	399.527	88.1562	NA	6.98e-89	AHSG	rs3916377	0.0116193	399.501
AHSG_P02765_OID30706_v1_Inflammation_II_expo_rt.txt	chr3	186613992	3:186331781:T:C:imp:v1	T	C	0.0306753	1.00497	33985	ADD	0.303792	0.0219292	191.915	42.9157	NA	1.21e-43	AHSG	rs115036351	0.00561532	191.903
AHSG_P02765_OID30706_v1_Inflammation_II_expo_rt.txt	chr3	186617890	3:186335679:A:G:imp:v1	A	G	0.0305723	1.00023	33985	ADD	0.307496	0.0220032	195.302	43.6549	NA	2.21e-44	AHSG	rs73185622	0.00571388	195.291
AHSG_P02765_OID30706_v1_Inflammation_II_expo_rt.txt	chr3	186618170	3:186335959:T:C:imp:v1	T	C	0.0167173	0.924435	33985	ADD	0.279307	0.0307358	82.5798	18.9936	NA	1.01e-19	AHSG	rs113740045	0.002424	82.5751
AHSG_P02765_OID30706_v1_Inflammation_II_expo_rt.txt	chr3	186622454	3:186340243:G:A:imp:v1	G	A	0.0926779	0.991534	33985	ADD	-0.308007	0.0131216	550.993	121.116	NA	7.66e-122	AHSG	rs16860932	0.0159542	550.962
AHSG_P02765_OID30706_v1_Inflammation_II_expo_rt.txt	chr3	186623236	3:186341025:T:C:imp:v1	T	C	0.0112674	0.969058	33985	ADD	1.64703	0.0364559	2041.12	444.976	NA	0	AHSG	rs149062332	0.0566565	2040.99
AHSG_P02765_OID30706_v1_Inflammation_II_expo_rt.txt	chr3	186626825	3:186344614:C:T:imp:v1	C	T	0.136749	0.981389	33985	ADD	-0.589534	0.0111363	2802.44	610.363	NA	0	AHSG	rs9870756	0.0761792	2802.27
AHSG_P02765_OID30706_v1_Inflammation_II_expo_rt.txt	chr3	186627056	3:186344845:T:G:imp:v1	T	G	0.0177132	0.961268	33985	ADD	0.334138	0.0292933	130.112	29.4119	NA	3.87e-30	AHSG	rs113522309	0.00381389	130.104
AHSG_P02765_OID30706_v1_Inflammation_II_expo_rt.txt	chr3	186635071	3:186352860:G:C:imp:v1	G	C	0.504429	0.936491	33985	ADD	0.327935	0.00783191	1753.23	382.43	NA	0	AHSG	rs9814347	0.0490577	1753.13
AHSG_P02765_OID30706_v1_Inflammation_II_expo_rt.txt	chr3	186639582	3:186357371:T:C:imp:v1	T	C	0.0170014	0.873527	33985	ADD	0.313028	0.0313961	99.4065	22.6869	NA	2.06e-23	AHSG	rs151238375	0.00291648	99.4007
AHSG_P02765_OID30706_v1_Inflammation_II_expo_rt.txt	chr3	186639602	3:186357391:T:C:imp:v1	T	C	0.0254524	1.00117	33985	ADD	-0.176793	0.0240397	54.0844	12.7166	NA	1.92e-13	AHSG	rs11918268	0.00158889	54.0812
AHSG_P02765_OID30706_v1_Inflammation_II_expo_rt.txt	chr3	186639624	3:186357413:A:G:imp:v1	A	G	0.12429	0.894971	33985	ADD	-0.279159	0.012145	528.331	116.186	NA	6.52e-117	AHSG	rs75828796	0.0153081	528.303
AHSG_P02765_OID30706_v1_Inflammation_II_expo_rt.txt	chr3	186639627	3:186357416:A:G:imp:v1	A	G	0.0119867	0.843707	33985	ADD	0.222	0.0379009	34.3088	8.32768	NA	4.7e-09	AHSG	rs111993713	0.00100851	34.3069
AHSG_P02765_OID30706_v1_Inflammation_II_expo_rt.txt	chr3	186640577	3:186358366:A:C:imp:v1	A	C	0.129292	0.998926	33985	ADD	-0.120453	0.0113003	113.62	25.8019	NA	1.58e-26	AHSG	rs1047115	0.0033321	113.613
AHSG_P02765_OID30706_v1_Inflammation_II_expo_rt.txt	chr3	186645641	3:186363430:T:C:imp:v1	T	C	0.0163278	0.952472	33985	ADD	0.252546	0.0306342	67.9621	15.7781	NA	1.67e-16	AHSG	rs142403242	0.00199578	67.9583
AHSG_P02765_OID30706_v1_Inflammation_II_expo_rt.txt	chr3	186652684	3:186370473:C:T:imp:v1	C	T	0.0226718	1.00071	33985	ADD	0.230202	0.0254404	81.8787	18.8395	NA	1.45e-19	AHSG	rs116329575	0.00240347	81.8738
AHSG_P02765_OID30706_v1_Inflammation_II_expo_rt.txt	chr3	186663473	3:186381262:T:C:imp:v1	T	C	0.206414	0.990061	33985	ADD	0.106689	0.0094075	128.614	29.0841	NA	8.24e-30	AHSG	rs55636108	0.00377019	128.607
AHSG_P02765_OID30706_v1_Inflammation_II_expo_rt.txt	chr3	186664498	3:186382287:C:A:imp:v1	C	A	0.019641	0.987606	33985	ADD	0.20708	0.0274713	56.8223	13.3215	NA	4.77e-14	AHSG	rs78140870	0.00166919	56.8188
AHSG_P02765_OID30706_v1_Inflammation_II_expo_rt.txt	chr3	186665920	3:186383709:A:G:imp:v1	A	G	0.0250986	0.971795	33985	ADD	0.295193	0.0245641	144.414	32.5399	NA	2.88e-33	AHSG	rs78954048	0.00423137	144.406
AHSG_P02765_OID30706_v1_Inflammation_II_expo_rt.txt	chr3	186668797	3:186386586:C:T:imp:v1	C	T	0.0152356	0.901848	33985	ADD	-0.374406	0.0325734	132.117	29.8507	NA	1.41e-30	AHSG	rs55759544	0.00387246	132.109
AHSG_P02765_OID30706_v1_Inflammation_II_expo_rt.txt	chr3	186670578	3:186388367:G:A:imp:v1	G	A	0.0131946	0.835821	33985	ADD	0.24106	0.0363135	44.0671	10.4985	NA	3.17e-11	AHSG	rs116297009	0.00129498	44.0645
AHSG_P02765_OID30706_v1_Inflammation_II_expo_rt.txt	chr3	186672039	3:186389828:A:G:imp:v1	A	G	0.118542	1.00833	33985	ADD	0.0912691	0.0116757	61.1054	14.2668	NA	5.41e-15	AHSG	rs9856702	0.00179479	61.1021
AHSG_P02765_OID30706_v1_Inflammation_II_expo_rt.txt	chr3	186689988	3:186407777:G:A:imp:v1	G	A	0.331947	0.990068	33985	ADD	-0.209357	0.00808625	670.319	147.07	NA	8.51e-148	AHSG	rs2052766	0.0193424	670.278
AHSG_P02765_OID30706_v1_Inflammation_II_expo_rt.txt	chr3	186693415	3:186411204:G:A:imp:v1	G	A	0.0360254	0.993822	33985	ADD	0.361715	0.020398	314.454	69.631	NA	2.34e-70	AHSG	rs77188638	0.00916792	314.436
AHSG_P02765_OID30706_v1_Inflammation_II_expo_rt.txt	chr3	186696470	3:186414259:G:A:imp:v1	G	A	0.0165749	0.975473	33985	ADD	-0.176437	0.0300406	34.4953	8.36928	NA	4.27e-09	AHSG	rs184036273	0.00101399	34.4934
AHSG_P02765_OID30706_v1_Inflammation_II_expo_rt.txt	chr3	186705548	3:186423337:G:A:imp:v1	G	A	0.220769	0.980891	33985	ADD	-0.0556003	0.00922399	36.3343	8.77933	NA	1.66e-09	AHSG	rs76675228	0.00106799	36.3321
AHSG_P02765_OID30706_v1_Inflammation_II_expo_rt.txt	chr3	186716391	3:186434180:A:G:imp:v1	A	G	0.197461	0.992814	33985	ADD	0.16349	0.00955004	293.07	64.9723	NA	1.07e-65	AHSG	rs80355270	0.00854979	293.053
AHSG_P02765_OID30706_v1_Inflammation_II_expo_rt.txt	chr3	186733568	3:186451357:A:C:imp:v1	A	C	0.0258723	0.994399	33985	ADD	-0.16906	0.0239286	49.9165	11.7947	NA	1.6e-12	AHSG	rs5030106	0.00146664	49.9139
AHSG_P02765_OID30706_v1_Inflammation_II_expo_rt.txt	chr3	186733795	3:186451584:C:T:imp:v1	C	T	0.0441504	0.955698	33985	ADD	-0.316981	0.0188673	282.258	62.6164	NA	2.42e-63	AHSG	rs35477316	0.00823697	282.242
AHSG_P02765_OID30706_v1_Inflammation_II_expo_rt.txt	chr3	186743560	3:186461349:G:C:imp:v1	G	C	0.131892	0.975794	33985	ADD	0.127646	0.0113351	126.814	28.6903	NA	2.04e-29	AHSG	rs5030095	0.00371757	126.806
AHSG_P02765_OID30706_v1_Inflammation_II_expo_rt.txt	chr3	186745590	3:186463379:A:AACGACTC:imp:v1	A	AACGACTC	0.621011	0.988839	33985	ADD	0.0461193	0.00786004	34.4283	8.35433	NA	4.42e-09	AHSG	rs201296141	0.00101202	34.4263
AHSG_P02765_OID30706_v1_Inflammation_II_expo_rt.txt	chr3	186749020	3:186466809:CA:C:imp:v1	CA	C	0.757085	0.975089	33985	ADD	0.121	0.00894859	182.836	40.9338	NA	1.16e-41	AHSG	rs76470501	0.00535111	182.825
AHSG_P02765_OID30706_v1_Inflammation_II_expo_rt.txt	chr3	186762912	3:186480701:T:G:imp:v1	T	G	0.508291	0.913506	33985	ADD	0.0723277	0.00792702	83.2509	19.141	NA	7.23e-20	AHSG	rs71631277	0.00244365	83.2461
AHSG_P02765_OID30706_v1_Inflammation_II_expo_rt.txt	chr3	186768074	3:186485863:T:C:imp:v1	T	C	0.0914496	0.923183	33985	ADD	0.0874264	0.0136799	40.8431	9.78264	NA	1.65e-10	AHSG	rs73185679	0.00120036	40.8408
AHSG_P02765_OID30706_v1_Inflammation_II_expo_rt.txt	chr3	186771052	3:186488841:G:A:imp:v1	G	A	0.0551673	0.947964	33985	ADD	0.182788	0.017054	114.88	26.0777	NA	8.36e-27	AHSG	rs73185681	0.00336892	114.873
AHSG_P02765_OID30706_v1_Inflammation_II_expo_rt.txt	chr3	186786359	3:186504148:T:C:imp:v1	T	C	0.36368	0.994779	33985	ADD	-0.0480674	0.00789762	37.0433	8.93729	NA	1.16e-09	AHSG	rs266718	0.0010888	37.041
AHSG_P02765_OID30706_v1_Inflammation_II_expo_rt.txt	chr3	186786414	3:186504203:G:A:imp:v1	G	A	0.0236722	1.00249	33985	ADD	-0.194909	0.0248847	61.3477	14.3203	NA	4.78e-15	AHSG	rs62294447	0.00180189	61.3442
AHSG_P02765_OID30706_v1_Inflammation_II_expo_rt.txt	chr3	186827549	3:186545338:A:G:imp:v1	A	G	0.374187	0.982068	33985	ADD	0.102193	0.00789873	167.388	37.5604	NA	2.75e-38	AHSG	rs266771	0.00490125	167.379
AHSG_P02765_OID30706_v1_Inflammation_II_expo_rt.txt	chr3	186835281	3:186553070:T:C:imp:v1	T	C	0.829098	0.991285	33985	ADD	0.0994095	0.0101178	96.5344	22.057	NA	8.77e-23	AHSG	rs1656932	0.00283246	96.5291
AHSG_P02765_OID30706_v1_Inflammation_II_expo_rt.txt	chr3	186851010	3:186568799:C:A:imp:v1	C	A	0.178564	0.972224	33985	ADD	0.0611328	0.0100318	37.1359	8.9579	NA	1.1e-09	AHSG	rs7627128	0.00109151	37.1334
AHSG_P02765_OID30706_v1_Inflammation_II_expo_rt.txt	chr3	186867592	3:186585381:T:C:imp:v1	T	C	0.89006	0.954052	33985	ADD	-0.0839314	0.0123964	45.8415	10.8921	NA	1.28e-11	AHSG	rs7628649	0.00134705	45.8387
AHSG_P02765_OID30706_v1_Inflammation_II_expo_rt.txt	chr3	186885033	3:186602822:C:T:imp:v1	C	T	0.0136309	0.858655	33985	ADD	-0.236327	0.0352617	44.918	10.6873	NA	2.05e-11	AHSG	rs187620481	0.00131996	44.9153
AHSG_P02765_OID30706_v1_Inflammation_II_expo_rt.txt	chr3	186886547	3:186604336:A:G:imp:v1	A	G	0.108238	0.870752	33985	ADD	0.0713668	0.0130678	29.8255	7.32538	NA	4.73e-08	AHSG	rs9865095	0.000876838	29.8237
AHSG_P02765_OID30706_v1_Inflammation_II_expo_rt.txt	chr3	186971238	3:186689026:G:A:imp:v1	G	A	0.101987	0.971388	33985	ADD	-0.103888	0.0127035	66.8784	15.5394	NA	2.89e-16	AHSG	rs112699814	0.00196401	66.8742
AHSG_P02765_OID30706_v1_Inflammation_II_expo_rt.txt	chr3	186981822	3:186699610:A:G:imp:v1	A	G	0.400647	1.0061	33985	ADD	-0.0548927	0.0077105	50.6832	11.9644	NA	1.09e-12	AHSG	rs6444191	0.00148912	50.6802
AHSP_Q9NZD4_OID21078_v1_Neurology_expo_rt.txt	chr16	31526303	16:31537624:C:A:imp:v1	C	A	0.034542	0.955337	33620	ADD	0.117633	0.0199204	34.8709	8.45308	NA	3.52e-09	AHSP	rs72790561	0.00103613	34.8688
AHSP_Q9NZD4_OID21078_v1_Neurology_expo_rt.txt	chr16	31527737	16:31539058:CTTT:C:imp:v1	CTTT	C	0.160828	0.996241	33620	ADD	-0.0529586	0.00968666	29.89	7.33982	NA	4.57e-08	AHSP	rs79688408	0.000888262	29.8882
AIF1L_Q9BQI0_OID30204_v1_Cardiometabolic_II_expo_rt.txt	chr9	130989559	9:133864946:A:G:imp:v1	A	G	0.805403	0.991955	33042	ADD	-0.0532098	0.00975514	29.7521	7.30894	NA	4.91e-08	AIF1L	rs4740392	0.00089962	29.7502
AIF1L_Q9BQI0_OID30204_v1_Cardiometabolic_II_expo_rt.txt	chr9	130998436	9:133873823:G:A:imp:v1	G	A	0.0975618	0.808948	33042	ADD	0.106639	0.0144068	54.7895	12.8724	NA	1.34e-13	AIF1L	rs34324511	0.00165543	54.7862
AIF1L_Q9BQI0_OID30204_v1_Cardiometabolic_II_expo_rt.txt	chr9	131005559	9:133880946:G:A:imp:v1	G	A	0.0378202	0.881243	33042	ADD	0.160005	0.0214793	55.4911	13.0274	NA	9.39e-14	AIF1L	rs116866401	0.00167661	55.4882
AIF1L_Q9BQI0_OID30204_v1_Cardiometabolic_II_expo_rt.txt	chr9	131032445	9:133907832:C:T:imp:v1	C	T	0.431635	0.815276	33042	ADD	0.0795779	0.00860078	85.6069	19.6586	NA	2.19e-20	AIF1L	rs56228165	0.00258416	85.6018
AIF1L_Q9BQI0_OID30204_v1_Cardiometabolic_II_expo_rt.txt	chr9	131036319	9:133911706:C:T:imp:v1	C	T	0.494537	0.999033	33042	ADD	0.0567281	0.00769717	54.3167	12.7679	NA	1.71e-13	AIF1L	rs2275131	0.00164117	54.3135
AIF1L_Q9BQI0_OID30204_v1_Cardiometabolic_II_expo_rt.txt	chr9	131036605	9:133911992:G:A:imp:v1	G	A	0.0536564	0.976549	33042	ADD	-0.101391	0.0172642	34.4908	8.36828	NA	4.28e-09	AIF1L	rs3818799	0.00104276	34.4889
AIF1L_Q9BQI0_OID30204_v1_Cardiometabolic_II_expo_rt.txt	chr9	131039428	9:133914815:T:A:imp:v1	T	A	0.53018	0.904316	33042	ADD	-0.0522712	0.00810111	41.6328	9.95809	NA	1.1e-10	AIF1L	rs2293519	0.00125841	41.6303
AIF1L_Q9BQI0_OID30204_v1_Cardiometabolic_II_expo_rt.txt	chr9	131041000	9:133916387:G:T:imp:v1	G	T	0.459949	0.988195	33042	ADD	-0.0924426	0.0077632	141.795	31.9674	NA	1.08e-32	AIF1L	rs11244254	0.00427304	141.787
AIF1L_Q9BQI0_OID30204_v1_Cardiometabolic_II_expo_rt.txt	chr9	131044222	9:133919609:C:T:imp:v1	C	T	0.0398546	0.983229	33042	ADD	-0.184879	0.0198274	86.9453	19.9525	NA	1.12e-20	AIF1L	rs116939484	0.00262444	86.9395
AIF1L_Q9BQI0_OID30204_v1_Cardiometabolic_II_expo_rt.txt	chr9	131058619	9:133934006:C:T:imp:v1	C	T	0.0124207	0.918354	33042	ADD	0.294617	0.0362271	66.1375	15.3762	NA	4.21e-16	AIF1L	rs118147646	0.00199762	66.1336
AIF1L_Q9BQI0_OID30204_v1_Cardiometabolic_II_expo_rt.txt	chr9	131059539	9:133934926:G:A:imp:v1	G	A	0.684455	0.998036	33042	ADD	-0.310504	0.00828445	1404.78	306.715	NA	1.93e-307	AIF1L	rs7856365	0.0407811	1404.69
AIF1L_Q9BQI0_OID30204_v1_Cardiometabolic_II_expo_rt.txt	chr9	131067171	9:133942558:C:T:imp:v1	C	T	0.0325495	0.998071	33042	ADD	0.256656	0.0216965	139.934	31.5603	NA	2.75e-32	AIF1L	rs34652877	0.00421718	139.926
AIF1L_Q9BQI0_OID30204_v1_Cardiometabolic_II_expo_rt.txt	chr9	131079793	9:133955180:G:A:imp:v1	G	A	0.0172825	0.972701	33042	ADD	-0.218063	0.0299236	53.105	12.5001	NA	3.16e-13	AIF1L	rs79689420	0.00160462	53.1019
AIF1L_Q9BQI0_OID30204_v1_Cardiometabolic_II_expo_rt.txt	chr9	131093079	9:133968466:C:G:imp:v1	C	G	0.232996	0.989926	33042	ADD	-0.229476	0.00914253	630.001	138.301	NA	5e-139	AIF1L	rs752931	0.01871	629.964
AIF1L_Q9BQI0_OID30204_v1_Cardiometabolic_II_expo_rt.txt	chr9	131103828	9:133979215:T:A:imp:v1	T	A	0.0114364	0.96762	33042	ADD	-0.304981	0.0367593	68.8357	15.9705	NA	1.07e-16	AIF1L	rs79713253	0.00207894	68.8311
AIF1L_Q9BQI0_OID30204_v1_Cardiometabolic_II_expo_rt.txt	chr9	131119927	9:133995314:T:A:imp:v1	T	A	0.05251	0.987007	33042	ADD	0.308147	0.0173515	315.387	69.8342	NA	1.46e-70	AIF1L	rs34310012	0.00945475	315.366
AIF1L_Q9BQI0_OID30204_v1_Cardiometabolic_II_expo_rt.txt	chr9	131122484	9:133997871:T:C:imp:v1	T	C	0.0286442	0.99353	33042	ADD	0.180513	0.0231294	60.91	14.2237	NA	5.97e-15	AIF1L	rs79967688	0.00184002	60.9063
AIF1L_Q9BQI0_OID30204_v1_Cardiometabolic_II_expo_rt.txt	chr9	131125771	9:134001158:C:G:imp:v1	C	G	0.133407	0.982495	33042	ADD	-0.0658033	0.0114102	33.259	8.09332	NA	8.07e-09	AIF1L	rs77164468	0.00100555	33.257
AIF1L_Q9BQI0_OID30204_v1_Cardiometabolic_II_expo_rt.txt	chr9	131131873	9:134007260:G:C:imp:v1	G	C	0.0181156	0.957605	33042	ADD	-0.173793	0.0294621	34.7966	8.4365	NA	3.66e-09	AIF1L	rs139746821	0.001052	34.7945
AIF1L_Q9BQI0_OID30204_v1_Cardiometabolic_II_expo_rt.txt	chr9	131157310	9:134032697:G:A:imp:v1	G	A	0.0162237	0.913893	33042	ADD	-0.181569	0.0318346	32.5301	7.93047	NA	1.17e-08	AIF1L	rs118148697	0.000983538	32.5281
AIF1L_Q9BQI0_OID30204_v1_Cardiometabolic_II_expo_rt.txt	chr9	131167448	9:134042835:G:A:imp:v1	G	A	0.0119434	0.90322	33042	ADD	-0.346517	0.0372448	86.5598	19.8678	NA	1.36e-20	AIF1L	rs117155251	0.00261285	86.5549
AIF1L_Q9BQI0_OID30204_v1_Cardiometabolic_II_expo_rt.txt	chr9	131203456	9:134078843:A:T:imp:v1	A	T	0.220417	0.970912	33042	ADD	-0.108726	0.00941889	133.251	30.0986	NA	7.97e-31	AIF1L	rs35834418	0.00401655	133.242
AIF1L_Q9BQI0_OID30204_v1_Cardiometabolic_II_expo_rt.txt	chr9	131213220	9:134088607:G:T:imp:v1	G	T	0.075631	0.996103	33042	ADD	-0.110131	0.014572	57.1194	13.3871	NA	4.1e-14	AIF1L	rs113526407	0.0017257	57.1156
AIF1L_Q9BQI0_OID30204_v1_Cardiometabolic_II_expo_rt.txt	chr9	131255672	9:134131059:C:T:imp:v1	C	T	0.333285	0.916675	33042	ADD	-0.05973	0.00852214	49.1234	11.6191	NA	2.4e-12	AIF1L	rs12380413	0.00148449	49.1203
AIF1L_Q9BQI0_OID30204_v1_Cardiometabolic_II_expo_rt.txt	chr9	131290501	9:134165888:T:C:imp:v1	T	C	0.523637	0.966951	33042	ADD	-0.0470491	0.00782895	36.1157	8.73061	NA	1.86e-09	AIF1L	rs11244356	0.00109183	36.1135
AIF1L_Q9BQI0_OID30204_v1_Cardiometabolic_II_expo_rt.txt	chr9	131293248	9:134168635:A:G:imp:v1	A	G	0.582847	0.940431	33042	ADD	-0.0819866	0.00804426	103.876	23.6667	NA	2.15e-24	AIF1L	rs11352413	0.00313389	103.869
AIF1L_Q9BQI0_OID30204_v1_Cardiometabolic_II_expo_rt.txt	chr9	131323046	9:134198433:C:T:imp:v1	C	T	0.0247653	0.929314	33042	ADD	-0.174316	0.0256654	46.1295	10.9559	NA	1.11e-11	AIF1L	rs144789453	0.00139414	46.1267
AIF1L_Q9BQI0_OID30204_v1_Cardiometabolic_II_expo_rt.txt	chr9	131334099	9:134209486:A:G:imp:v1	A	G	0.105184	0.975912	33042	ADD	0.135203	0.0126879	113.551	25.7867	NA	1.63e-26	AIF1L	rs505950	0.00342481	113.545
AIF1L_Q9BQI0_OID30204_v1_Cardiometabolic_II_expo_rt.txt	chr9	131334901	9:134210288:C:A:imp:v1	C	A	0.39188	1.00149	33042	ADD	-0.0921949	0.00787329	137.12	30.945	NA	1.14e-31	AIF1L	rs7850041	0.00413272	137.112
AIF1L_Q9BQI0_OID30204_v1_Cardiometabolic_II_expo_rt.txt	chr9	131337016	9:134212403:G:T:imp:v1	G	T	0.0566673	0.866276	33042	ADD	0.114464	0.017865	41.052	9.82906	NA	1.48e-10	AIF1L	rs726171	0.00124087	41.0493
AIF1L_Q9BQI0_OID30204_v1_Cardiometabolic_II_expo_rt.txt	chr9	131341739	9:134217126:C:G:imp:v1	C	G	0.187355	0.974219	33042	ADD	0.0775127	0.00998493	60.2637	14.0811	NA	8.3e-15	AIF1L	rs11521842	0.00182053	60.26
AKAP12_Q02952_OID30571_v1_Inflammation_II_expo_rt.txt	chr6	151267379	6:151588514:A:T:imp:v1	A	T	0.227885	1.00444	33187	ADD	0.0521861	0.00914284	32.5797	7.94156	NA	1.14e-08	AKAP12	rs7773463	0.000980739	32.5778
AKAP12_Q02952_OID30571_v1_Inflammation_II_expo_rt.txt	chr6	151292905	6:151614040:T:C:imp:v1	T	C	0.952334	1.00433	33187	ADD	-0.113963	0.0179964	40.1011	9.61771	NA	2.41e-10	AKAP12	rs1555104	0.00120688	40.0987
AKR1B1_P15121_OID21244_v1_Oncology_expo_rt.txt	chr7	134450869	7:134135621:T:C:imp:v1	T	C	0.0135078	0.990868	32907	ADD	-0.586504	0.0333472	309.331	68.515	NA	3.05e-69	AKR1B1	rs2229542	0.00931261	309.312
AKR1B1_P15121_OID21244_v1_Oncology_expo_rt.txt	chr7	134503187	7:134187939:A:G:imp:v1	A	G	0.032857	0.983449	32907	ADD	0.149314	0.0216739	47.4601	11.2508	NA	5.61e-12	AKR1B1	rs782545	0.00144017	47.457
AKR1C4_P17516_OID20062_v1_Cardiometabolic_expo_rt.txt	chr10	5219196	10:5261159:A:G:imp:v1	A	G	0.177002	0.99787	33043	ADD	-0.068129	0.0101002	45.4996	10.8162	NA	1.53e-11	AKR1C4	rs11253048	0.00137508	45.4965
AKR7L_Q8NHP1_OID30488_v1_Inflammation_II_expo_rt.txt	chr1	18826868	1:19153362:C:A:imp:v1	C	A	0.02791	1.00817	32981	ADD	-0.129885	0.0230544	31.7402	7.7539	NA	1.76e-08	AKR7L	rs115361338	0.000961455	31.7383
AKR7L_Q8NHP1_OID30488_v1_Inflammation_II_expo_rt.txt	chr1	18914740	1:19241234:T:C:imp:v1	T	C	0.19936	0.927635	32981	ADD	-0.054135	0.00991467	29.8127	7.32251	NA	4.76e-08	AKR7L	rs7530141	0.000903116	29.8108
AKR7L_Q8NHP1_OID30488_v1_Inflammation_II_expo_rt.txt	chr1	18929177	1:19255671:C:T:imp:v1	C	T	0.165585	0.988003	32981	ADD	-0.0969135	0.0103151	88.2723	20.2439	NA	5.7e-21	AKR7L	rs6698642	0.0026693	88.2664
AKR7L_Q8NHP1_OID30488_v1_Inflammation_II_expo_rt.txt	chr1	19029641	1:19356135:G:A:imp:v1	G	A	0.188311	0.980976	32981	ADD	-0.0936889	0.00984754	90.515	20.7362	NA	1.84e-21	AKR7L	rs2147948	0.00273695	90.5096
AKR7L_Q8NHP1_OID30488_v1_Inflammation_II_expo_rt.txt	chr1	19149298	1:19475792:C:T:imp:v1	C	T	0.450896	0.994211	32981	ADD	-0.122602	0.00768367	254.598	56.5879	NA	2.58e-57	AKR7L	rs12565575	0.00766045	254.584
AKR7L_Q8NHP1_OID30488_v1_Inflammation_II_expo_rt.txt	chr1	19270347	1:19596841:G:A:imp:v1	G	A	0.872521	1.00406	32981	ADD	0.0961294	0.0114049	71.0445	16.4569	NA	3.49e-17	AKR7L	rs7536049	0.00214947	71.04
AKR7L_Q8NHP1_OID30488_v1_Inflammation_II_expo_rt.txt	chr1	19282519	1:19609013:C:T:imp:v1	C	T	0.097373	0.992242	32981	ADD	-0.316627	0.012902	602.257	132.267	NA	5.41e-133	AKR7L	rs59622577	0.0179333	602.22
AKR7L_Q8NHP1_OID30488_v1_Inflammation_II_expo_rt.txt	chr1	19301437	1:19627931:C:T:imp:v1	C	T	0.174748	1.00439	32981	ADD	0.1257	0.0100159	157.502	35.4006	NA	3.98e-36	AKR7L	rs12132200	0.00475289	157.494
AKR7L_Q8NHP1_OID30488_v1_Inflammation_II_expo_rt.txt	chr1	19303285	1:19629779:T:C:imp:v1	T	C	0.087547	1.00127	32981	ADD	0.156181	0.0134772	134.293	30.3267	NA	4.71e-31	AKR7L	rs75708060	0.00405535	134.286
AKR7L_Q8NHP1_OID30488_v1_Inflammation_II_expo_rt.txt	chr1	19320617	1:19647111:G:A:imp:v1	G	A	0.316018	0.957615	32981	ADD	-0.0640869	0.00837714	58.5257	13.6976	NA	2.01e-14	AKR7L	rs7521086	0.00177139	58.5222
AKR7L_Q8NHP1_OID30488_v1_Inflammation_II_expo_rt.txt	chr1	19332737	1:19659231:C:T:imp:v1	C	T	0.0346764	0.967041	32981	ADD	-0.184261	0.0211885	75.6249	17.4647	NA	3.43e-18	AKR7L	rs111638867	0.00228775	75.6206
AKR7L_Q8NHP1_OID30488_v1_Inflammation_II_expo_rt.txt	chr1	19337917	1:19664411:G:C:imp:v1	G	C	0.516495	0.997526	32981	ADD	0.0842793	0.00764057	121.672	27.5649	NA	2.72e-28	AKR7L	rs183339	0.00367559	121.665
AKR7L_Q8NHP1_OID30488_v1_Inflammation_II_expo_rt.txt	chr1	19357046	1:19683540:G:C:imp:v1	G	C	0.344733	0.997778	32981	ADD	0.0712574	0.00802747	78.7958	18.1619	NA	6.89e-19	AKR7L	rs214347	0.00238343	78.7909
AKR7L_Q8NHP1_OID30488_v1_Inflammation_II_expo_rt.txt	chr1	19476217	1:19802711:T:C:imp:v1	T	C	0.0159609	0.848906	32981	ADD	-0.297097	0.0330125	80.9916	18.6446	NA	2.27e-19	AKR7L	rs112270419	0.00244969	80.9866
AKR7L_Q8NHP1_OID30488_v1_Inflammation_II_expo_rt.txt	chr1	19489315	1:19815809:G:A:imp:v1	G	A	0.520594	0.939794	32981	ADD	-0.0525194	0.00787	44.5338	10.6021	NA	2.5e-11	AKR7L	rs7532554	0.00134847	44.5311
AKR7L_Q8NHP1_OID30488_v1_Inflammation_II_expo_rt.txt	chr1	19501329	1:19827823:A:G:imp:v1	A	G	0.0768035	0.986352	32981	ADD	-0.0876021	0.0144083	36.9658	8.92004	NA	1.2e-09	AKR7L	rs17400406	0.00111958	36.9639
AKR7L_Q8NHP1_OID30488_v1_Inflammation_II_expo_rt.txt	chr1	19661982	1:19988475:G:T:imp:v1	G	T	0.0346866	1.00119	32981	ADD	-0.126743	0.0208196	37.0597	8.94094	NA	1.15e-09	AKR7L	rs61768262	0.00112241	37.0576
ALCAM_Q13740_OID20273_v1_Cardiometabolic_expo_rt.txt	chr3	104695739	3:104414583:G:A:imp:v1	G	A	0.373418	0.995758	34090	ADD	-0.0443535	0.00716138	38.3586	9.23012	NA	5.89e-10	ALCAM	rs2947779	0.00112395	38.3563
ALCAM_Q13740_OID20273_v1_Cardiometabolic_expo_rt.txt	chr3	105140433	3:104859277:G:C:imp:v1	G	C	0.507491	0.986258	34090	ADD	0.0422141	0.00696506	36.7338	8.86834	NA	1.35e-09	ALCAM	rs12486550	0.00107639	36.7316
ALCAM_Q13740_OID20273_v1_Cardiometabolic_expo_rt.txt	chr3	105184985	3:104903829:T:C:imp:v1	T	C	0.0129515	0.931274	34090	ADD	-0.221494	0.0316602	48.9439	11.5794	NA	2.63e-12	ALCAM	rs76103097	0.00143366	48.9408
ALCAM_Q13740_OID20273_v1_Cardiometabolic_expo_rt.txt	chr3	105285068	3:105003912:C:T:imp:v1	C	T	0.290104	1.00395	34090	ADD	-0.0806866	0.00759818	112.767	25.615	NA	2.43e-26	ALCAM	rs9865072	0.00329703	112.761
ALCAM_Q13740_OID20273_v1_Cardiometabolic_expo_rt.txt	chr3	105352333	3:105071177:T:C:imp:v1	T	C	0.127468	1.00189	34090	ADD	0.138186	0.0103537	178.131	39.9065	NA	1.24e-40	ALCAM	rs111551757	0.00519812	178.119
ALCAM_Q13740_OID20273_v1_Cardiometabolic_expo_rt.txt	chr3	105414522	3:105133366:G:T:imp:v1	G	T	0.0204508	0.983059	34090	ADD	0.188087	0.024637	58.2831	13.644	NA	2.27e-14	ALCAM	rs113646777	0.00170676	58.2796
ALCAM_Q13740_OID20273_v1_Cardiometabolic_expo_rt.txt	chr3	105455580	3:105174424:A:T:imp:v1	A	T	0.482344	1.00339	34090	ADD	-0.0541744	0.00690354	61.5808	14.3717	NA	4.25e-15	ALCAM	rs2053307	0.00180316	61.5771
ALCAM_Q13740_OID20273_v1_Cardiometabolic_expo_rt.txt	chr3	105467422	3:105186266:G:A:imp:v1	G	A	0.0184442	0.982912	34090	ADD	0.266887	0.0259186	106.03	24.139	NA	7.26e-25	ALCAM	rs74537900	0.00310067	106.025
ALCAM_Q13740_OID20273_v1_Cardiometabolic_expo_rt.txt	chr3	105533195	3:105252039:T:C:imp:v1	T	C	0.0115061	0.998564	34090	ADD	0.186314	0.03242	33.0266	8.04141	NA	9.09e-09	ALCAM	rs75035331	0.000967871	33.0247
ALCAM_Q13740_OID20273_v1_Cardiometabolic_expo_rt.txt	chr3	105545332	3:105264176:G:T:imp:v1	G	T	0.0485333	1.01124	34090	ADD	-0.30284	0.0159911	358.649	79.2562	NA	5.54e-80	ALCAM	rs34926152	0.0104111	358.628
ALCAM_Q13740_OID20273_v1_Cardiometabolic_expo_rt.txt	chr3	105563170	3:105282014:T:A:imp:v1	T	A	0.0884085	0.991874	34090	ADD	0.0669347	0.0122265	29.9709	7.35795	NA	4.39e-08	ALCAM	rs79156306	0.000878395	29.969
ALCAM_Q13740_OID20273_v1_Cardiometabolic_expo_rt.txt	chr3	105570811	3:105289655:G:A:imp:v1	G	A	0.366064	1.00908	34090	ADD	-0.0635816	0.00714215	79.251	18.262	NA	5.47e-19	ALCAM	rs11705950	0.00231937	79.2464
ALCAM_Q13740_OID20273_v1_Cardiometabolic_expo_rt.txt	chr3	105584318	3:105303162:T:C:imp:v1	T	C	0.0398131	0.964893	34090	ADD	0.132646	0.0180002	54.3045	12.7652	NA	1.72e-13	ALCAM	rs115830163	0.00159043	54.301
ALDH1A1_P00352_OID21128_v1_Neurology_expo_rt.txt	chr9	72635916	9:75250832:A:G:imp:v1	A	G	0.0240515	0.963621	33687	ADD	-0.139182	0.0238572	34.0352	8.2666	NA	5.41e-09	ALDH1A1	rs79402502	0.00100931	34.0331
ALDH1A1_P00352_OID21128_v1_Neurology_expo_rt.txt	chr9	72929058	9:75543974:T:TAA:imp:v1	T	TAA	0.900871	0.987675	33687	ADD	0.0898359	0.0120775	55.328	12.9914	NA	1.02e-13	ALDH1A1	rs200691652	0.00163972	55.3248
ALDH1A1_P00352_OID21128_v1_Neurology_expo_rt.txt	chr9	72933610	9:75548526:A:T:imp:v1	A	T	0.265491	0.98927	33687	ADD	0.0908858	0.00817207	123.688	28.0062	NA	9.86e-29	ALDH1A1	rs112596047	0.00365825	123.681
[truncated: 47,347 more rows]

## Sheet: Table S4
Table S4. Summary of ferroptosis-related exposure data with F-statistics in the present study.
[truncated: 8,219 more rows]

[truncated: 13 more sheets: Table S, Table S6, Table S7, Table S8, Table S9, Table S10, Table S11, Table S12, Table S13, Table S14, Table S15, Table S16, Table S17]
